# Supplementary material for: Highly chemoselective oxidative dimerization of indolosesquiterpene alkaloids: a biomimetic approach to dixiamycin
Source: Royal Society of Chemistry journal article supplement (doi:10.1039/d4sc01396d), 2024-01-01
Supplement: d4sc01396d1.pdf [file d4sc01396d1.pdf]

Supplemental material for:

## Highly Chemoselective Oxidative Dimerization of Indolosesquiterpene Alkaloids: Biomimetic Approach to Dixiamycin

Mintu Munda,<sup>§a</sup> Ayan Mondal,<sup>§b</sup> Nanda Kishore Roy,<sup>a</sup> Ranjit Murmu,<sup>b</sup> Sovan Niyogi,<sup>b</sup> and  
Alakesh Bisai<sup>\*a,b</sup>

<sup>a</sup>Department of Chemistry, Indian Institute of Science Education and Research Bhopal,  
Bhopal Bypass Road, Bhopal, MP - 462 066, India.

<sup>b</sup>Department of Chemical Sciences, Indian Institute of Science Education and Research  
Kolkata, Mohanpur, Nadia, WB - 741 246, India.

e-Mail: [alakesh@iiserkol.ac.in](mailto:alakesh@iiserkol.ac.in), [alakeshb@gmail.com](mailto:alakeshb@gmail.com)

<sup>§</sup>both authors contributed equally to this work.

### Table of Contents

|           |                                                                                                |
|-----------|------------------------------------------------------------------------------------------------|
| S2:       | Materials and Methods                                                                          |
| S3-S23:   | Substrate (Deoxy-xiamycin derivatives) preparation for Oxidative Dimerization                  |
| S24-S30:  | General procedure for the synthesis of compound <i>epi</i> -(+)- <b>8a</b>                     |
| S30-S36:  | Substrate (Deoxy-oridamycin derivatives) preparation for Oxidative<br>Dimerization             |
| S37-S44:  | General procedure for the synthesis of compound (+)- <b>24</b>                                 |
| S44-S49:  | Substrate (Regioisomeric deoxy-xiamycin derivatives) preparation for Oxidative<br>Dimerization |
| S50-S51:  | Optimization of dimerization and general procedure for oxidative dimerization<br>reaction      |
| S51-S69:  | Substrate Scope of Indolosesquiterpenoids                                                      |
| S69-S72:  | Total Synthesis of (+)-Xiamycin A methyl ester [(+)- <b>14</b> ]                               |
| S73-S74:  | Synthesis of C-C dimer of xiamycin A methyl ester [(+)- <b>15</b> ]                            |
| S74-S77:  | Total Synthesis of (+)-Xiamycin A [(+)- <b>5</b> ]                                             |
| S77-S78:  | Synthesis of C-C dimer of xiamycin A [(+)- <b>3</b> ]                                          |
| S79-S79:  | References and Notes                                                                           |
| S80-S195: | Spectral traces                                                                                |

## Materials and Methods

Unless otherwise stated, reactions were performed in oven-dried glassware fitted with rubber septa under an inert atmosphere and were stirred with Teflon-coated magnetic stirring bars. The Syringe was used to transfer the solvents and liquid reagents. Tetrahydrofuran (THF) and diethyl ether (Et<sub>2</sub>O) were distilled over sodium/benzophenone ketyl. Dichloromethane (CH<sub>2</sub>Cl<sub>2</sub>), toluene, and benzene were distilled over calcium hydride. All other solvents and reagents were used as received unless otherwise noted. Reaction temperatures above 25 °C refer to oil bath temperature. Thin layer chromatography was performed using silica gel 60 F-254 precoated plates (0.25 mm) and visualized by UV irradiation, anisaldehyde stain and other stains. Silicagel of particle size 230-400 and 100-200 mesh were used for flash chromatography. Melting points were recorded on a digital melting point apparatus. <sup>1</sup>H and <sup>13</sup>C NMR spectra were recorded 400, 500 MHz spectrometers with <sup>13</sup>C operating frequencies of 100, 125 MHz respectively. Chemical shifts (δ) are reported in ppm relative to the residual solvent (CDCl<sub>3</sub>) signal (δ = 7.26 for <sup>1</sup>H NMR and δ = 77.0 for <sup>13</sup>C NMR), (CD<sub>3</sub>)<sub>2</sub>SO signal (δ = 2.50 for <sup>1</sup>H NMR and δ = 39.5 for <sup>13</sup>C NMR) and CD<sub>3</sub>OD signal (δ = 3.33 for <sup>1</sup>H NMR and δ = 49.0 for <sup>13</sup>C NMR). Data for <sup>1</sup>H NMR spectra are reported as follows: chemical shift (multiplicity, coupling constants, and number of hydrogen). Abbreviations are as follows: s (singlet), d (doublet), t (triplet), q (quartet), m (multiplet), br (broad). IR spectra were recorded on a FT-IR system (Spectrum BX) and are reported in frequency of absorption (cm<sup>-1</sup>). Only selected IR absorbencies are reported. High-Resolution Mass Spectrometry (HRMS) data was recorded on MicrOTOF-Q-II mass spectrometer using methanol as solvent. Optical rotations were measured on an automatic polarimeter.

## Substrate (Deoxy-xiamycin derivatives) preparation for Oxidative Dimerization:

Compound **8a**<sup>1</sup> was synthesized by the following literature protocol.

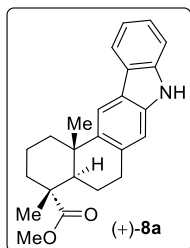

(4*R*,4*aR*,13*bS*)-methyl 4,13*b*-dimethyl-2,3,4,4*a*,5,6,8,13*b*-octahydro-1*H*-naphtho[2,1-**b**]carbazole-4-carboxylate [(+)-**8a**]: Following the general procedure (+)-**8a** was obtained as yellow foam (30 mmol scale of reaction; 10% yield over six steps from abietic acid).  $R_f = 0.35$  (20% EtOAc in *n*-hexane).

<sup>1</sup>H NMR (500 MHz, CDCl<sub>3</sub>)  $\delta$  8.03 (d,  $J = 7.8$  Hz, 1H), 7.96 (s, 1H), 7.85 (s, 1H), 7.37 – 7.32 (m, 2H), 7.20 (t,  $J = 7.3$  Hz, 1H), 7.03 (s, 1H), 3.70 (d,  $J = 1.5$  Hz, 3H), 3.13 – 3.05 (m, 2H), 2.56 (d,  $J = 12.4$  Hz, 1H), 2.39 – 2.33 (m, 1H), 1.95 (ddd,  $J = 22.8, 12.8, 9.2$  Hz, 1H), 1.83 (dd,  $J = 21.6, 11.5$  Hz, 3H), 1.73 – 1.67 (m, 2H), 1.51 (dt,  $J = 10.6, 3.6$  Hz, 1H), 1.35 (d,  $J = 1.5$  Hz, 3H), 1.32 (s, 3H).

<sup>13</sup>C NMR (125 MHz, CDCl<sub>3</sub>)  $\delta$  179.4, 142.0, 140.2, 138.2, 133.8, 125.4, 123.8, 122.0, 120.0, 119.2, 115.5, 110.6, 110.0, 52.1, 47.9, 45.3, 38.9, 37.6, 36.9, 30.8, 25.9, 22.0, 18.9, 16.7.

IR (neat)  $\nu_{\max}$  3402, 2926, 1720, 1465, 1243, 1023, 823, 750, 582 cm<sup>-1</sup>.

HRMS (ESI)  $m/z$ : [M + H]<sup>+</sup> calcd. for [C<sub>24</sub>H<sub>27</sub>NO<sub>2</sub> + H]<sup>+</sup> 362.2120, found 362.2113.

$[\alpha]_{589}^{20} = +61.3$  (c = 0.3, CHCl<sub>3</sub>).

## Methylation of Carbazole derivative (+)-**8a**:

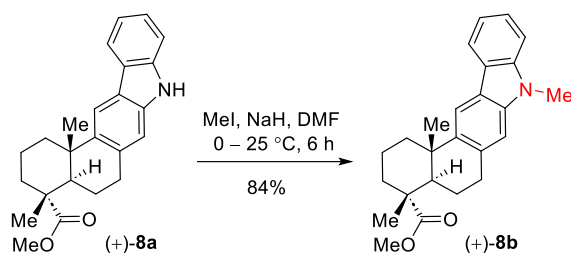

Carbazole (+)-**8a** (250 mg, 0.69 mmol, 1.0 equiv.) was taken in an oven dried round bottom flask dissolved in 4 mL of DMF maintaining N<sub>2</sub> inertness and set on an ice bath. Sodium hydride (55.2 mg, 1.38 mmol, 2.0 equiv.) was added in portion-wise manner to the reaction vessel and stirred for 15 min at 0 °C. Then iodomethane (65.6 μL, 1.04 mmol, 1.5 equiv.) was directly added to the solution and the reaction mixture was allowed to stir at 25 °C for 4 h until the full consumption of starting material (monitored by TLC). The reaction was quenched with excess of saturated aqueous NH<sub>4</sub>Cl solution. Then the solution was extracted with EtOAc and water. The aqueous phase was extracted with EtOAc (6 mL X 3). The combined organic layers were dried over anhydrous Na<sub>2</sub>SO<sub>4</sub> and concentrated in a rotary evaporator under vacuum. The crude product was purified by flash chromatography with 15% EtOAc in *n*-hexane to afford (+)-**8b** as yellow foam (217.6 mg, 84% yield).

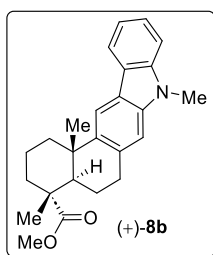

(4*R*,4*aR*,13*bS*)-methyl 4,8,13*b*-trimethyl-2,3,4,4*a*,5,6,8,13*b*-octahydro-1*H*-naphtho[2,1-**b**]carbazole-4-carboxylate [(+)-**8b**]: (+)-**8b** was obtained as yellow foam (0.69 mmol scale of reaction; 84% yield). *R*<sub>f</sub> = 0.7 (20% EtOAc in *n*-hexane).

<sup>1</sup>H NMR (500 MHz, CDCl<sub>3</sub>) δ 8.05 (d, *J* = 7.7 Hz, 1H), 7.99 (s, 1H), 7.44 – 7.42 (m, 1H), 7.34 (d, *J* = 8.1 Hz, 1H), 7.22 – 7.18 (m, 1H), 7.06 (s, 1H), 3.78 (s, 3H), 3.70 (s, 3H), 3.19 – 3.15 (m, 2H), 2.60 – 2.56 (m, 1H), 2.37 (dd, *J* = 12.5, 2.4 Hz, 1H), 2.00 – 1.94 (m, 1H), 1.87 – 1.83

(m, 2H), 1.82 – 1.78 (m, 1H), 1.72 – 1.68 (m, 2H), 1.55 – 1.50 (m, 1H), 1.35 (s, 3H), 1.33 (s, 3H).

$^{13}\text{C}$  NMR (125 MHz,  $\text{CDCl}_3$ )  $\delta$  179.3, 141.6, 141.5, 139.8, 133.7, 125.3, 123.2, 121.4, 120.0, 118.6, 115.6, 108.3, 107.9, 52.0, 47.9, 45.4, 39.0, 37.6, 36.9, 31.0, 29.1, 25.9, 22.1, 18.9, 16.8.

IR (neat)  $\nu_{\text{max}}$  3320, 2926, 1740, 1465, 1342, 1247, 1023, 853, 750, 682  $\text{cm}^{-1}$ .

HRMS (ESI)  $m/z$ :  $[\text{M} + \text{H}]^+$  calcd. for  $[\text{C}_{25}\text{H}_{29}\text{NO}_2 + \text{H}]^+$  376.2277, found 376.2276.

$[\alpha]_{589}^{25} = +75.6$  ( $c = 0.6$ ,  $\text{CHCl}_3$ ).

### Ethylation of Carbazole derivative (+)-**8a**:

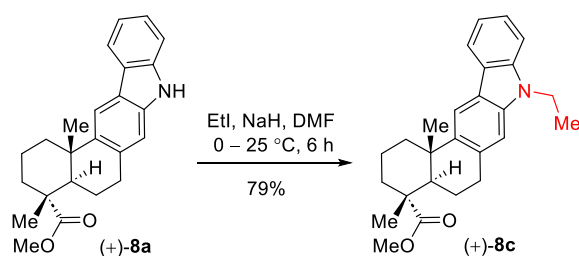

Carbazole (+)-**8a** (275 mg, 0.76 mmol, 1.0 equiv.) was taken in an oven dried round bottom flask dissolved in 5 mL of DMF maintaining  $\text{N}_2$  inertness and set on an ice bath. Sodium hydride (60.8 mg, 1.52 mmol, 2.0 equiv.) was added in portion-wise manner to the reaction vessel and stirred for 15 min at 0 °C. Then ethyl iodide (92.6  $\mu\text{L}$ , 1.14 mmol, 1.5 equiv.) was directly added to the solution and the reaction mixture was allowed to stir at 25 °C for 4 h until the full consumption of starting material (monitored by TLC). The reaction was quenched with excess of saturated aqueous  $\text{NH}_4\text{Cl}$  solution. Then the solution was extracted with EtOAc and water. The aqueous phase was extracted with EtOAc (7 mL X 3). The combined organic layers were dried over anhydrous  $\text{Na}_2\text{SO}_4$  and concentrated in a rotary evaporator under vacuum. The crude product was purified by flash chromatography with 10% EtOAc in *n*-hexane to afford (+)-**8c** as white solid (233.9 mg, 79% yield).

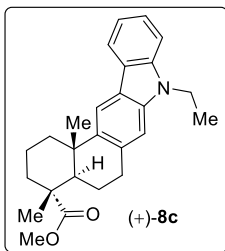

(4*R*,4*aR*,13*bS*)-methyl 8-ethyl-4,13*b*-dimethyl-2,3,4,4*a*,5,6,8,13*b*-octahydro-1*H*-naphtho[2,1-*b*]carbazole-4-carboxylate [(+)-8c]: (+)-8c was obtained as white solid (0.76 mmol scale of reaction; 79% yield).  $R_f = 0.6$  (10% EtOAc in *n*-hexane).

$^1\text{H NMR}$  (500 MHz,  $\text{CDCl}_3$ )  $\delta$  8.06 (d,  $J = 7.7$  Hz, 1H), 8.00 (s, 1H), 7.43 (ddd,  $J = 8.2, 7.1, 1.2$  Hz, 1H), 7.35 (d,  $J = 8.1$  Hz, 1H), 7.20 (ddd,  $J = 8.0, 7.1, 1.0$  Hz, 1H), 7.07 (s, 1H), 4.30 (q,  $J = 7.2$  Hz, 2H), 3.70 (s, 3H), 3.18 (ddd,  $J = 8.9, 5.4, 3.8$  Hz, 2H), 2.61 – 2.56 (m, 1H), 2.37 (dd,  $J = 12.5, 2.4$  Hz, 1H), 1.97 (ddd,  $J = 10.6, 8.6, 3.3$  Hz, 1H), 1.87 – 1.84 (m, 2H), 1.83 – 1.79 (m, 1H), 1.73 – 1.69 (m, 2H), 1.53 (ddd,  $J = 9.8, 4.8, 2.2$  Hz, 1H), 1.42 (t,  $J = 7.2$  Hz, 3H), 1.35 (s, 3H), 1.34 – 1.34 (m, 3H).

$^{13}\text{C NMR}$  (125 MHz,  $\text{CDCl}_3$ )  $\delta$  179.4, 141.4, 140.5, 138.7, 133.6, 125.2, 123.3, 121.5, 120.1, 118.5, 115.7, 108.3, 107.9, 52.1, 47.9, 45.4, 39.0, 37.6, 37.5, 36.9, 31.0, 25.9, 22.1, 18.9, 16.7, 13.9.

**IR** (neat)  $\nu_{\text{max}}$  3320, 2840, 1740, 1650, 1465, 1340, 1247, 1023, 867, 750, 646  $\text{cm}^{-1}$ .

**HRMS** (ESI)  $m/z$ :  $[\text{M} + \text{H}]^+$  calcd. for  $[\text{C}_{26}\text{H}_{31}\text{NO}_2 + \text{H}]^+$  390.2433, found 390.2426.

$[\alpha]_{589}^{25} = +82.1$  ( $c = 0.7$ ,  $\text{CHCl}_3$ ).

### Benylation of Carbazole derivative (+)-8a:

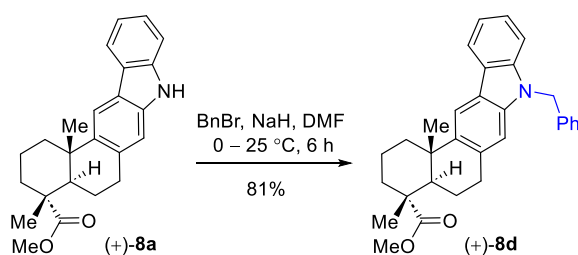

Carbazole (+)-**8a** (255 mg, 0.71 mmol, 1.0 equiv.) was taken in an oven dried round bottom flask dissolved in 5 mL of DMF maintaining N<sub>2</sub> inertness and set on an ice bath. Sodium hydride (56.4 mg, 1.41 mmol, 2.0 equiv.) was added in portion-wise manner to the reaction vessel and stirred for 15 min at 0 °C. Then benzyl bromide (126.5 μL, 1.07 mmol, 1.5 equiv.) was directly added to the solution and the reaction mixture was allowed to stir at 25 °C for 4 h until the full consumption of starting material (monitored by TLC). The reaction was quenched with excess of saturated aqueous NH<sub>4</sub>Cl solution. Then the solution was extracted with EtOAc and water. The aqueous phase was extracted with EtOAc (6 mL X 3). The combined organic layers were dried over anhydrous Na<sub>2</sub>SO<sub>4</sub> and concentrated in a rotary evaporator under vacuum. The crude product was purified by flash chromatography with 10% EtOAc in *n*-hexane to afford (+)-**8d** as yellow liquid (259.7 mg, 81% yield).

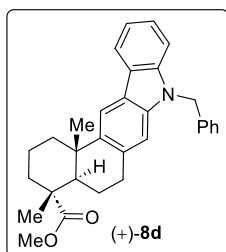

(4*R*,4*aR*,13*bS*)-methyl 8-benzyl-4,13*b*-dimethyl-2,3,4,4*a*,5,6,8,13*b*-octahydro-1*H*-naphtho[2,1-*b*]carbazole-4-carboxylate [(+)-**8d**]: (+)-**8d** was obtained as yellow liquid (0.71 mmol scale of reaction; 81% yield). *R*<sub>f</sub> = 0.6 (10% EtOAc in *n*-hexane).

<sup>1</sup>H NMR (500 MHz, CDCl<sub>3</sub>) δ 8.07 (d, *J* = 7.7 Hz, 1H), 8.01 (s, 1H), 7.41 – 7.38 (m, 2H), 7.36 (d, *J* = 7.1 Hz, 2H), 7.29 (s, 1H), 7.27 (d, *J* = 4.4 Hz, 1H), 7.18 – 7.15 (m, 2H), 7.01 (s, 1H), 5.44 (s, 2H), 3.68 (s, 3H), 3.09 (dd, *J* = 10.3, 5.7 Hz, 2H), 2.57 (d, *J* = 12.5 Hz, 1H), 2.34 (dd, *J* = 12.5, 2.5 Hz, 1H), 1.86 – 1.83 (m, 2H), 1.82 – 1.79 (m, 2H), 1.70 (dd, *J* = 9.2, 3.2 Hz, 2H), 1.51 – 1.47 (m, 1H), 1.33 (s, 3H), 1.33 (s, 3H).

<sup>13</sup>C NMR (125 MHz, CDCl<sub>3</sub>) δ 179.3, 141.8, 141.3, 139.5, 137.6, 133.9, 128.9, 127.5, 126.6, 125.5, 123.5, 121.6, 120.1, 119.0, 115.7, 108.8, 108.3, 52.0, 47.9, 46.7, 45.3, 39.0, 37.6, 36.9, 30.9, 25.8, 22.0, 18.9, 16.8.

IR (neat)  $\nu_{\max}$  3310, 2840, 1740, 1632, 1465, 1365, 1247, 1015, 900, 867, 750, 610 cm<sup>-1</sup>.

**HRMS** (ESI)  $m/z$ :  $[M + H]^+$  calcd. for  $[C_{31}H_{33}NO_2 + H]^+$  452.2589, found 452.2614.

$[\alpha]_D^{25} = +43.0$  ( $c = 0.5$ ,  $CHCl_3$ ).

### Synthesis of Carbazole derivative (+)-**8e**:

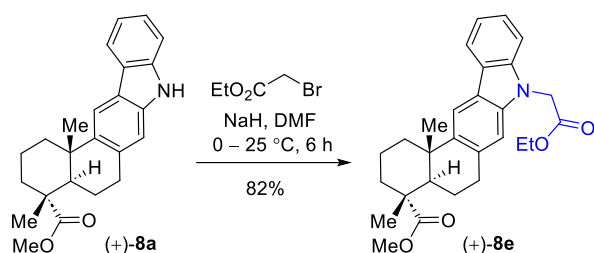

Carbazole (+)-**8a** (250 mg, 0.69 mmol, 1.0 equiv.) was taken in an oven dried round bottom flask dissolved in 5 mL of DMF maintaining  $N_2$  inertness and set on an ice bath. Sodium hydride (55.2 mg, 1.38 mmol, 2.0 equiv.) was added in portion-wise manner to the reaction vessel and stirred for 15 min at 0 °C. Then ethyl bromoacetate (119.2  $\mu$ L, 1.04 mmol, 1.5 equiv.) was directly added to the solution and the reaction mixture was allowed to stir at 25 °C for 4 h until the full consumption of starting material (monitored by TLC). The reaction was quenched with excess of saturated aqueous  $NH_4Cl$  solution. Then the solution was extracted with EtOAc and water. The aqueous phase was extracted with EtOAc (6 mL X 3). The combined organic layers were dried over anhydrous  $Na_2SO_4$  and concentrated in a rotary evaporator under vacuum. The crude product was purified by flash chromatography with 15% EtOAc in *n*-hexane to afford (+)-**8e** as yellow oil (253.3 mg, 82% yield).

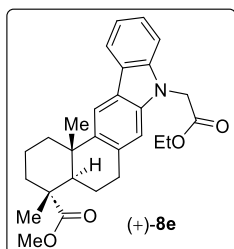

(4*R*,4*aR*,13*bS*)-methyl 8-(2-ethoxy-2-oxoethyl)-4,13*b*-dimethyl-2,3,4,4*a*,5,6,8,13*b*-octahydro-1*H*-naphtho[2,1-*b*]carbazole-4-carboxylate [(+)-**8e**]: (+)-**8e** was obtained as yellow oil (0.69 mmol scale of reaction; 82% yield).  $R_f = 0.3$  (10% EtOAc in *n*-hexane).



**<sup>1</sup>H NMR** (500 MHz, CDCl<sub>3</sub>) δ 8.02 (d, *J* = 7.7 Hz, 1H), 7.96 (s, 1H), 7.39 (t, *J* = 7.7 Hz, 1H), 7.25 (d, *J* = 2.8 Hz, 1H), 7.20 (t, *J* = 7.5 Hz, 1H), 6.96 (s, 1H), 4.90 (s, 2H), 4.20 (d, *J* = 7.0 Hz, 2H), 3.68 (s, 3H), 3.14 – 3.10 (m, 2H), 2.54 (d, *J* = 12.6 Hz, 1H), 2.33 (dd, *J* = 12.5, 2.5 Hz, 1H), 1.96 – 1.90 (m, 1H), 1.83 (d, *J* = 11.8 Hz, 2H), 1.80 – 1.76 (m, 1H), 1.71 – 1.65 (m, 2H), 1.52 – 1.46 (m, 1H), 1.32 (s, 3H), 1.30 (s, 3H), 1.23 (d, *J* = 7.1 Hz, 3H).

**<sup>13</sup>C NMR** (125 MHz, CDCl<sub>3</sub>) δ 179.3, 168.8, 142.2, 141.2, 139.3, 134.0, 125.5, 123.7, 121.8, 120.1, 119.4, 115.8, 108.3, 107.9, 61.7, 61.2, 52.0, 47.9, 45.3, 39.0, 37.6, 36.9, 30.9, 25.8, 22.0, 18.9, 16.7, 14.3.

**IR** (neat)  $\nu_{\max}$  3346, 2946, 1735, 1632, 1465, 1163, 1020, 943, 867, 790, 685 cm<sup>-1</sup>.

**HRMS** (ESI) *m/z*: [M + H]<sup>+</sup> calcd. for [C<sub>28</sub>H<sub>33</sub>NO<sub>4</sub> + H]<sup>+</sup> 448.2488, found 448.2482.

[ $\alpha$ ]<sub>D</sub><sup>25</sup> = +45.1 (c = 0.4, CHCl<sub>3</sub>).

#### Prenylation of Carbazole derivative (+)-**8a**:

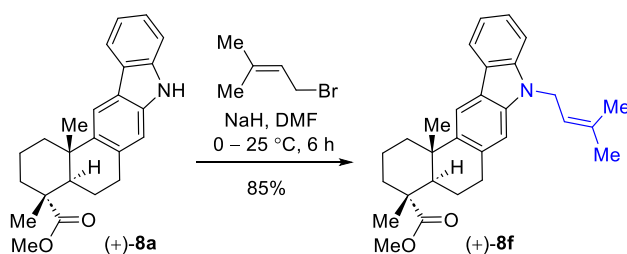

Carbazole (+)-**8a** (245 mg, 0.68 mmol, 1.0 equiv.) was taken in an oven dried round bottom flask dissolved in 5 mL of DMF maintaining N<sub>2</sub> inertness and set on an ice bath. Sodium hydride (54.2 mg, 1.36 mmol, 2.0 equiv.) was added in portion-wise manner to the reaction vessel and stirred for 15 min at 0 °C. Then prenyl bromide (152  $\mu$ L, 1.02 mmol, 1.5 equiv.) was directly added to the solution and the reaction mixture was allowed to stir at 25 °C for 4 h until the full consumption of starting material (monitored by TLC). The reaction was quenched with excess of saturated aqueous NH<sub>4</sub>Cl solution. Then the solution was extracted with EtOAc and water. The aqueous phase was extracted with EtOAc (6 mL X 3). The combined organic layers were dried over anhydrous Na<sub>2</sub>SO<sub>4</sub> and concentrated in a rotary evaporator under

vacuum. The crude product was purified by flash chromatography with 8% EtOAc in *n*-hexane to afford (+)-**8f** as yellow gel (248.3 mg, 85% yield).

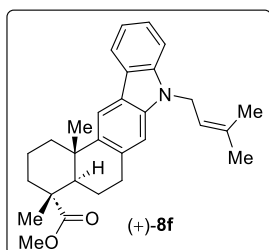

(4*R*,4*aR*,13*bS*)-methyl 4,13*b*-dimethyl-8-(3-methylbut-2-en-1-yl)-2,3,4,4*a*,5,6,8,13*b*-octahydro-1*H*-naphtho[2,1-*b*]carbazole-4-carboxylate [(+)-**8f**]: (+)-**8f** was obtained as yellow gel (0.68 mmol scale of reaction; 85% yield).  $R_f = 0.7$  (10% EtOAc in *n*-hexane).

**<sup>1</sup>H NMR** (500 MHz, CDCl<sub>3</sub>)  $\delta$  8.04 (d,  $J = 7.7$  Hz, 1H), 7.98 (s, 1H), 7.40 (t,  $J = 7.6$  Hz, 1H), 7.32 (d,  $J = 8.1$  Hz, 1H), 7.18 (t,  $J = 7.4$  Hz, 1H), 7.03 (s, 1H), 5.27 (d,  $J = 6.6$  Hz, 1H), 4.82 (d,  $J = 6.4$  Hz, 2H), 3.69 (s, 3H), 3.18 – 3.14 (m, 2H), 2.57 (d,  $J = 12.6$  Hz, 1H), 2.36 (dd,  $J = 12.5, 2.4$  Hz, 1H), 2.00 – 1.95 (m, 1H), 1.93 (s, 3H), 1.85 (d,  $J = 11.2$  Hz, 2H), 1.80 (d,  $J = 15.7$  Hz, 1H), 1.71 (s, 3H), 1.67 (d,  $J = 11.1$  Hz, 2H), 1.51 (dd,  $J = 9.0, 4.9$  Hz, 1H), 1.35 (s, 3H), 1.33 (s, 3H).

**<sup>13</sup>C NMR** (125 MHz, CDCl<sub>3</sub>)  $\delta$  179.3, 141.4, 140.9, 139.1, 135.0, 133.6, 125.2, 123.4, 121.6, 120.4, 120.0, 118.5, 115.6, 108.7, 108.2, 52.0, 47.9, 45.4, 41.1, 39.0, 37.6, 36.9, 31.0, 25.8, 25.7, 22.1, 18.9, 18.3, 16.8.

**IR** (neat)  $\nu_{\max}$  3310, 2946, 1740, 1632, 1465, 1247, 1064, 900, 867, 790, 665 cm<sup>-1</sup>.

**HRMS** (ESI)  $m/z$ :  $[M + H]^+$  calcd. for [C<sub>29</sub>H<sub>35</sub>NO<sub>2</sub> + H]<sup>+</sup> 430.2746, found 430.2759.

$[\alpha]_{589}^{25} = +54.2$  ( $c = 0.5$ , CHCl<sub>3</sub>).

## Propargylation of Carbazole derivative (+)-8a:

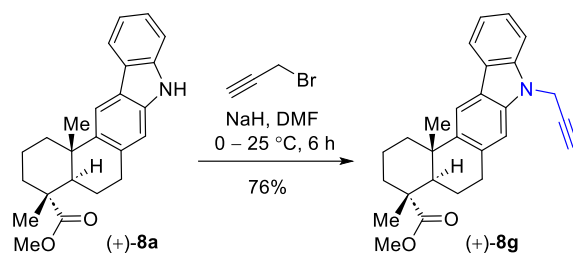

Carbazole (+)-**8a** (260 mg, 0.72 mmol, 1.0 equiv.) was taken in an oven dried round bottom flask dissolved in 5 mL of DMF maintaining N<sub>2</sub> inertness and set on an ice bath. Sodium hydride (57.5 mg, 1.44 mmol, 2.0 equiv.) was added in portion-wise manner to the reaction vessel and stirred for 15 min at 0 °C. Then propargyl bromide (81.8 μL, 1.08 mmol, 1.5 equiv.) was directly added to the solution and the reaction mixture was allowed to stir at 25 °C for 4 h until the full consumption of starting material (monitored by TLC). The reaction was quenched with excess of saturated aqueous NH<sub>4</sub>Cl solution. Then the solution was extracted with EtOAc and water. The aqueous phase was extracted with EtOAc (6 mL X 3). The combined organic layers were dried over anhydrous Na<sub>2</sub>SO<sub>4</sub> and concentrated in a rotary evaporator under vacuum. The crude product was purified by flash chromatography with 10% EtOAc in *n*-hexane to afford (+)-**8g** as yellow foam (218.6 g, 76% yield).

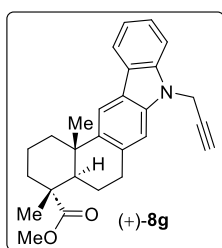

(4*R*,4*aR*,13*bS*)-methyl 4,13*b*-dimethyl-8-(prop-2-yn-1-yl)-2,3,4,4*a*,5,6,8,13*b*-octahydro-1*H*-naphtho[2,1-*b*]carbazole-4-carboxylate [(+)-**8g**]: (+)-**8g** was obtained as yellow foam (0.72 mmol scale of reaction; 76% yield). *R<sub>f</sub>* = 0.5 (10% EtOAc in *n*-hexane).

<sup>1</sup>H NMR (500 MHz, CDCl<sub>3</sub>) δ 8.04 (d, *J* = 7.8 Hz, 1H), 7.98 (s, 1H), 7.45 – 7.41 (m, 2H), 7.23 (t, *J* = 7.5 Hz, 1H), 7.13 (s, 1H), 4.96 (s, 2H), 3.69 (s, 3H), 3.17 (dd, *J* = 8.3, 3.7 Hz, 2H), 2.56 (d, *J* = 12.7 Hz, 1H), 2.35 (d, *J* = 12.5 Hz, 1H), 2.24 (s, 1H), 1.96 (t, *J* = 11.0 Hz, 1H), 1.84 (d,

$J = 11.4$  Hz, 2H), 1.80 (d,  $J = 11.0$  Hz, 1H), 1.72 – 1.66 (m, 2H), 1.54 – 1.49 (m, 1H), 1.34 (s, 3H), 1.32 (s, 3H).

$^{13}\text{C}$  NMR (125 MHz,  $\text{CDCl}_3$ )  $\delta$  179.3, 142.1, 140.4, 138.6, 134.0, 125.5, 123.7, 121.8, 120.1, 119.4, 115.8, 108.7, 108.2, 78.2, 72.2, 52.1, 47.8, 45.3, 38.9, 37.6, 36.9, 32.4, 31.0, 25.8, 22.0, 18.9, 16.7.

IR (neat)  $\nu_{\text{max}}$  3466, 2946, 1865, 1632, 1465, 1247, 1064, 943, 867, 790, 643  $\text{cm}^{-1}$ .

HRMS (ESI)  $m/z$ :  $[\text{M} + \text{H}]^+$  calcd. for  $[\text{C}_{27}\text{H}_{29}\text{NO}_2 + \text{H}]^+$  400.2277, found 400.2281.

$[\alpha]_{589}^{25} = +25.0$  ( $c = 0.1$ ,  $\text{CHCl}_3$ ).

### Procedure for the Synthesis of Alcohol (+)-8h:

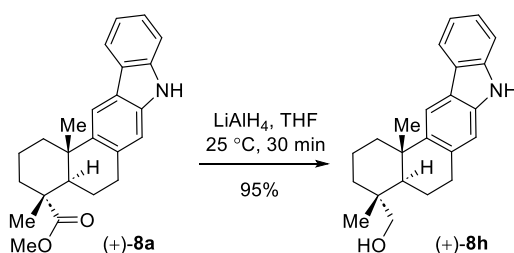

To a stirred solution (+)-8a (250 mg, 0.69 mmol, 1 equiv.) in tetrahydrofuran (4 mL), lithium aluminum hydride (26.6 mg, 0.7 mmol, 1.01 equiv.) was added at  $0\text{ }^\circ\text{C}$ , and the reaction mixture was stirred for 30 min at  $25\text{ }^\circ\text{C}$ . Distilled water (0.5 ml), 1M aq. NaOH (1 M, 0.5 ml), and distilled water (0.15 ml) was sequentially added at  $0\text{ }^\circ\text{C}$  and the resulting mixture was warmed to  $25\text{ }^\circ\text{C}$ . Dried over sodium sulfate and filtered over a pad of celite and washed with ethyl acetate. The combined organic layer was concentrated under reduced pressure, and the resulting crude residue was purified by flash column chromatography on silica gel with ~40-50% EtOAc in *n*-hexane to provide compound (+)-8h as colourless liquid (218.6 mg, 95%).

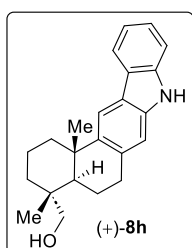

((4*R*,4*aR*,13*bS*)-4,13*b*-dimethyl-2,3,4,4*a*,5,6,8,13*b*-octahydro-1*H*-naphtho[2,1-*b*]carbazol-4-yl)methanol [(+)-**8h**]: (+)-**8h** was obtained as colourless liquid (0.69 mmol scale of reaction; 95% yield).  $R_f = 0.4$  (30% EtOAc in *n*-hexane).

**<sup>1</sup>H NMR** (500 MHz, CDCl<sub>3</sub>)  $\delta$  8.02 (d,  $J = 7.7$  Hz, 1H), 7.97 (s, 1H), 7.79 (s, 1H), 7.35 (d,  $J = 8.0$  Hz, 2H), 7.19 (t,  $J = 7.2$  Hz, 1H), 7.03 (s, 1H), 3.51 (d,  $J = 10.8$  Hz, 1H), 3.26 (d,  $J = 10.8$  Hz, 1H), 3.14 – 3.04 (m, 2H), 2.54 (d,  $J = 12.6$  Hz, 1H), 1.85 (dt,  $J = 11.1, 5.2$  Hz, 2H), 1.80 – 1.73 (m, 2H), 1.62 (d,  $J = 13.3$  Hz, 1H), 1.56 (dd,  $J = 13.0, 3.9$  Hz, 1H), 1.48 (dd,  $J = 12.9, 4.1$  Hz, 1H), 1.42 (d,  $J = 4.6$  Hz, 1H), 1.32 (s, 3H), 0.95 (s, 3H).

**<sup>13</sup>C NMR** (125 MHz, CDCl<sub>3</sub>)  $\delta$  142.4, 140.1, 138.1, 134.0, 125.4, 123.9, 121.9, 120.0, 119.2, 115.6, 110.5, 109.9, 72.4, 44.3, 39.4, 38.1, 38.0, 35.4, 30.8, 26.0, 19.2, 18.9, 17.6.

**IR** (neat)  $\nu_{\max}$  3584, 3300, 1720, 1465, 1243, 1085, 823, 720, 582 cm<sup>-1</sup>.

**HRMS** (ESI)  $m/z$ : [M + H]<sup>+</sup> calcd. for [C<sub>23</sub>H<sub>27</sub>NO + H]<sup>+</sup> 334.2171, found 334.2172.

$[\alpha]_{589}^{25} = +46.6$  ( $c = 0.5$ , CHCl<sub>3</sub>).

#### Reduction of *N*-Benzyl Carbazole derivative (+)-**8d**:

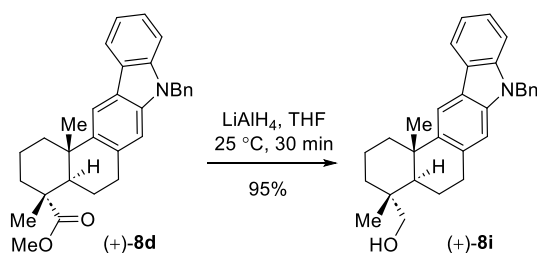

To a stirred solution (+)-**8d** (265 mg, 0.59 mmol, 1 equiv.) in tetrahydrofuran (6 mL), lithium aluminum hydride (22.5 mg, 0.59 mmol, 1.01 equiv.) was added at 0 °C, and the reaction mixture was stirred for 30 min at 25 °C. Distilled water (0.5 ml), 1M aq. NaOH (1 M, 1.0 ml), and distilled water (0.5 ml) was sequentially added at 0 °C and the resulting mixture was warmed to 25 °C. Dried over sodium sulfate and filtered over a pad of celite and washed with ethyl acetate. The combined organic layer was concentrated under reduced pressure, and the

resulting crude residue was purified by flash column chromatography on silica gel with 20% EtOAc in *n*-Hexane to provide compound (+)-**8i** as white foam (237.4 mg, 95%).

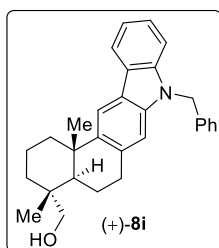

((4*R*,4*aR*,13*bS*)-**8-benzyl-4,13b-dimethyl-2,3,4,4a,5,6,8,13b-octahydro-1H-naphtho[2,1-b]carbazol-4-yl)methanol** [(+)-**8i**]: (+)-**8i** was obtained as white foam (0.59 mmol scale of reaction; 95% yield).  $R_f = 0.3$  (10% EtOAc in *n*-hexane).

**$^1\text{H NMR}$**  (500 MHz,  $\text{CDCl}_3$ )  $\delta$  8.11 (dt,  $J = 7.8, 0.9$  Hz, 1H), 8.06 (s, 1H), 7.40 (ddd,  $J = 8.2, 7.1, 1.2$  Hz, 1H), 7.32 – 7.29 (m, 2H), 7.28 – 7.27 (m, 1H), 7.27 – 7.21 (m, 2H), 7.21 – 7.18 (m, 2H), 7.04 (s, 1H), 5.46 (s, 2H), 3.53 (d,  $J = 10.9$  Hz, 1H), 3.29 (d,  $J = 11.0$  Hz, 1H), 3.16 – 3.07 (m, 2H), 2.59 (dq,  $J = 12.9, 2.8$  Hz, 1H), 1.90 – 1.85 (m, 2H), 1.84 – 1.80 (m, 1H), 1.77 (dd,  $J = 10.8, 4.0$  Hz, 1H), 1.62 (td,  $J = 13.1, 3.9$  Hz, 2H), 1.51 (dd,  $J = 12.9, 4.0$  Hz, 1H), 1.49 – 1.44 (m, 1H), 1.37 (s, 3H), 0.98 (s, 3H).

**$^{13}\text{C NMR}$**  (125 MHz,  $\text{CDCl}_3$ )  $\delta$  142.2, 141.2, 139.4, 137.6, 134.1, 128.8, 127.4, 126.6, 125.4, 123.5, 121.5, 120.0, 118.9, 115.8, 108.8, 108.2, 72.4, 46.6, 44.3, 39.4, 38.1, 38.0, 35.3, 31.0, 26.0, 19.2, 18.9, 17.6.

**IR** (neat)  $\nu_{\text{max}}$  3630, 3355, 1765, 1420, 1278, 1085, 953, 720, 682  $\text{cm}^{-1}$ .

**HRMS** (ESI)  $m/z$ :  $[\text{M} + \text{H}]^+$  calcd. for  $[\text{C}_{30}\text{H}_{33}\text{NO} + \text{H}]^+$  424.2640, found 424.2643.

$[\alpha]_{589}^{25} = +54.9$  ( $c = 0.7$ ,  $\text{CHCl}_3$ ).

### Procedure for the Synthesis of Silyl ether (+)-8j:

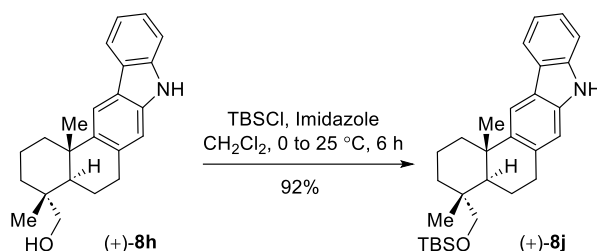

To a stirred solution of (+)-**8h** (260 mg, 0.78 mmol, 1 equiv.) in dichloromethane (8 mL), imidazole (79.7 mg, 1.17 mmol, 1.5 eq.), and chlorotrimethylsilane (141.7 mg, 0.94 mmol, 1.2 eq.) was added at 0 °C. The resulting mixture was stirred for 6 h at 25 °C, and then quenched with sat. aq. NaHCO<sub>3</sub> at 0 °C. The aqueous layer was extracted twice with dichloromethane. The combined organic layer was dried over Na<sub>2</sub>SO<sub>4</sub>. After filtration and concentration under reduced pressure, the resulting crude residue was purified by column chromatography on silica gel with ~5-15% EtOAc in *n*-hexane to provide compound (+)-**8j** as white solid (321.3 mg, 92%).

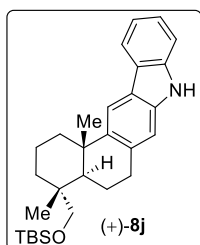

(4*R*,4*aR*,13*bS*)-4-(((*tert*-butyldimethylsilyl)oxy)methyl)-4,13*b*-dimethyl-

**2,3,4,4*a*,5,6,8,13*b*-octahydro-1*H*-naphtho[2,1-*b*]carbazole [(+)-**8j**]:** (+)-**8j** was obtained as white solid (0.78 mmol scale of reaction; 92% yield). *R<sub>f</sub>* = 0.6 (10% EtOAc in *n*-hexane).

**<sup>1</sup>H NMR** (500 MHz, CDCl<sub>3</sub>) δ 8.02 (d, *J* = 7.8 Hz, 1H), 7.98 (s, 1H), 7.77 (s, 1H), 7.35 (d, *J* = 4.0 Hz, 2H), 7.18 (dt, *J* = 8.3, 4.2 Hz, 1H), 7.07 (s, 1H), 3.47 (d, *J* = 9.6 Hz, 1H), 3.12 (d, *J* = 9.6 Hz, 1H), 3.09 – 3.03 (m, 2H), 2.51 (d, *J* = 12.7 Hz, 1H), 1.86 (t, *J* = 10.4 Hz, 3H), 1.78 – 1.70 (m, 2H), 1.59 – 1.52 (m, 3H), 1.32 (s, 3H), 0.88 (s, 3H), 0.88 – 0.86 (m, 9H), 0.04 (d, *J* = 1.5 Hz, 6H).

$^{13}\text{C}$  NMR (125 MHz,  $\text{CDCl}_3$ )  $\delta$  142.8, 140.2, 138.1, 134.4, 125.3, 124.0, 122.0, 120.0, 119.2, 115.8, 110.5, 109.9, 72.0, 44.1, 39.6, 38.3, 38.1, 35.6, 31.4, 26.3, 26.1, 19.2, 19.2, 18.5, 17.8, -5.4, -5.4.

IR (neat)  $\nu_{\text{max}}$  2950, 1720, 1565, 1300, 1085, 965, 823, 720, 680  $\text{cm}^{-1}$ .

HRMS (ESI)  $m/z$ :  $[\text{M} + \text{H}]^+$  calcd. for  $[\text{C}_{29}\text{H}_{41}\text{NOSi} + \text{H}]^+$  448.3036, found 448.3046.

$[\alpha]^{25}_{589} = +61.2$  ( $c = 0.3$ ,  $\text{CHCl}_3$ ).

### Deacetylation of Compound (+)-**8p**:

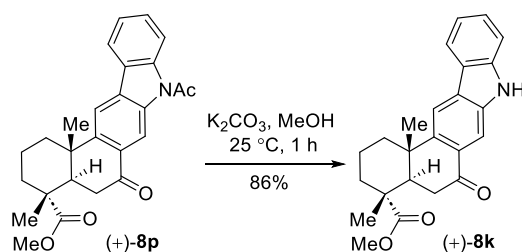

In an oven-dried round-bottom flask (+)-**8p** (300 mg, 0.72 mmol, 1.0 equiv.) was dissolved in 10 mL of methanol. To the reaction mixture solid  $\text{K}_2\text{CO}_3$  (198.6 mg, 1.44 mmol, 2.0 equiv.) was added at 25 °C and stirred for 1 h. After completion of the reaction (monitored by TLC) the reaction mixture was directly evaporated under reduced pressure. The mixture was then extracted with EtOAc (15 mL X 3). The combined organic layers were washed with brine and dried over  $\text{Na}_2\text{SO}_4$  and concentrated under reduced pressure. Then the crude product was purified by flash chromatography with 50% EtOAc in *n*-hexane to afford (+)-**8k** as yellow foam (232.5 mg, 86% yield).

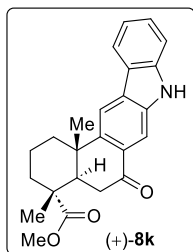



(4*R*,4*aR*,13*bS*)-methyl 4,13*b*-dimethyl-6-oxo-2,3,4,4*a*,5,6,8,13*b*-octahydro-1*H*-naphtho[2,1-*b*]carbazole-4-carboxylate [(+)-**8k**]: (+)-**8k** was obtained as yellow foam (0.72 mmol scale of reaction; 86% yield).  $R_f = 0.4$  (40% EtOAc in *n*-hexane).

$^1\text{H NMR}$  (500 MHz,  $\text{CDCl}_3$ )  $\delta$  8.94 (s, 1H), 8.20 (s, 1H), 8.09 (d,  $J = 7.8$  Hz, 1H), 8.01 (s, 1H), 7.45 (d,  $J = 2.9$  Hz, 2H), 7.24 (td,  $J = 5.2, 2.5$  Hz, 1H), 3.68 (s, 3H), 2.84 (d,  $J = 2.6$  Hz, 2H), 2.58 (d,  $J = 11.5$  Hz, 1H), 2.50 – 2.46 (m, 1H), 1.88 (d,  $J = 9.1$  Hz, 3H), 1.82 – 1.77 (m, 2H), 1.40 (s, 3H), 1.32 (s, 3H).

$^{13}\text{C NMR}$  (125 MHz,  $\text{CDCl}_3$ )  $\delta$  199.3, 178.2, 147.0, 142.0, 137.8, 128.8, 128.4, 127.6, 122.6, 121.2, 119.7, 114.5, 111.3, 110.0, 52.3, 46.9, 44.2, 38.1, 37.9, 37.7, 36.8, 24.6, 18.4, 16.6.

**IR** (neat)  $\nu_{\text{max}}$  3525, 2944, 1655, 1460, 1445, 1172, 823, 776, 665  $\text{cm}^{-1}$ .

**HRMS** (ESI)  $m/z$ :  $[\text{M} + \text{Na}]^+$  calcd. for  $[\text{C}_{24}\text{H}_{25}\text{NO}_3 + \text{Na}]^+$  398.1732, found 398.1732.

$[\alpha]_{589}^{25} = +104.3$  ( $c = 0.2$ ,  $\text{CHCl}_3$ ).

#### Stereoselective reduction of (+)-**8k**:

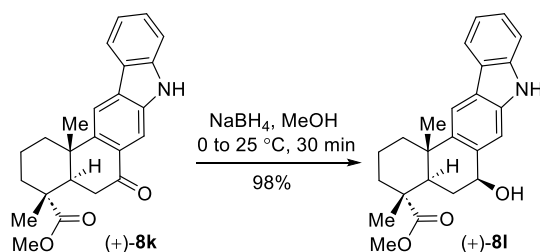

In an oven-dried round-bottom flask (+)-**8k** (232 mg, 0.62 mmol, 1.0 equiv.) in MeOH (4 mL) was taken at 0 °C,  $\text{NaBH}_4$  (28.2 mg, 0.74 mmol, 1.2 equiv.) was added portion wise and the reaction mixture was stirred at 25 °C temperature for 30 min. After complete consumption of starting material (monitored by TLC analysis), it was quenched with saturated  $\text{NH}_4\text{Cl}$  (2 mL) and extracted with EtOAc (8 mL X 2). The organic layers were dried over  $\text{Na}_2\text{SO}_4$  and concentrated on a rotary evaporator under reduced pressure. The crude products were purified by flash chromatography with 60% EtOAc in *n*-hexane to afford (+)-**8l** as colourless liquid (229.4 mg, 98% yield).

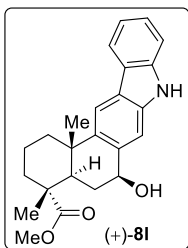

(4*R*,4*aR*,6*S*,13*bS*)-methyl 6-hydroxy-4,13*b*-dimethyl-2,3,4,4*a*,5,6,8,13*b*-octahydro-1*H*-naphtho[2,1-*b*]carbazole-4-carboxylate [(+)-**8l**]: (+)-**8l** was obtained as colourless liquid (0.62 mmol scale of reaction; 98% yield).  $R_f = 0.3$  (40% EtOAc in *n*-hexane).

**<sup>1</sup>H NMR** (500 MHz, CD<sub>3</sub>OD)  $\delta$  8.00 (d,  $J = 7.7$  Hz, 1H), 7.93 (s, 1H), 7.59 (s, 1H), 7.38 (d,  $J = 8.1$  Hz, 1H), 7.32 (t,  $J = 7.6$  Hz, 1H), 7.10 (t,  $J = 7.6$  Hz, 1H), 4.91 (dt,  $J = 14.2, 7.3$  Hz, 1H), 4.09 (p,  $J = 8.7, 8.0$  Hz, 1H), 3.69 (s, 3H), 2.58 (d,  $J = 13.0$  Hz, 1H), 2.31 (d,  $J = 12.7$  Hz, 1H), 2.00 (d,  $J = 6.4$  Hz, 1H), 1.93 (d,  $J = 12.2$  Hz, 1H), 1.76 (dt,  $J = 13.5, 6.7$  Hz, 3H), 1.70 – 1.64 (m, 1H), 1.58 – 1.51 (m, 1H), 1.38 (s, 3H), 1.34 (s, 3H).

**<sup>13</sup>C NMR** (125 MHz, CD<sub>3</sub>OD)  $\delta$  180.6, 142.4, 142.0, 140.2, 137.6, 126.4, 124.4, 124.1, 120.8, 119.4, 116.0, 111.6, 110.2, 71.9, 52.6, 45.3, 40.2, 39.2, 37.8, 33.8, 26.7, 19.7, 17.1, 14.4.

**IR** (neat)  $\nu_{\max}$  3610, 3158, 2855, 1764, 1695, 1535, 1430, 1365, 1169, 850 cm<sup>-1</sup>.

**HRMS** (ESI)  $m/z$ :  $[M + Na]^+$  calcd. for  $[C_{24}H_{27}NO_3 + Na]^+$  400.1889, found 400.1902.

$[\alpha]_{589}^{25} = +101.4$  ( $c = 0.4$ , MeOH).

#### Procedure for the Synthesis of Acid (+)-**8m**:

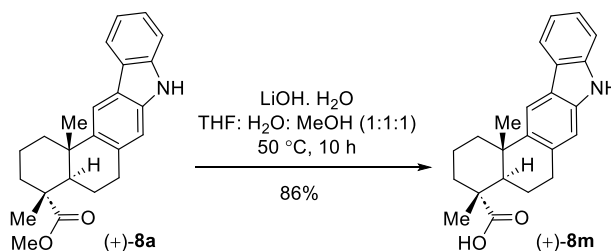

In an oven dried round-bottom flask (+)-**8a** (265 mg, 0.73 mmol, 1.0 equiv.) was taken in a mixture of THF, methanol and water [THF: MeOH: H<sub>2</sub>O (1:1:1)]. To the solution LiOH·H<sub>2</sub>O (1.23 g, 29.3 mmol, 40 equiv.) were added and reaction mixture was refluxed for 10 h at 50 °C. After completion of the reaction confirmed by TLC, reaction mixture was quenched with 4(N) HCl at 0 °C and the pH of the reaction mixture was adjusted to ~1-2. Then the reaction mixture was extracted with ethyl acetate (6mL X 3). The organic layer was collected, dried over Na<sub>2</sub>SO<sub>4</sub> and concentrated under reduced pressure. The crude product was purified by flash column chromatography with ~40-60% EtOAc in *n*-Hexane to afford (+)-**8m** as yellow liquid (218.2 mg, 86% yield).

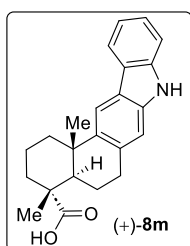

(4*R*,4*aR*,13*bS*)-**4,13b-dimethyl-2,3,4,4a,5,6,8,13b-octahydro-1H-naphtho[2,1-b]carbazole-4-carboxylic acid** [(+)-**8m**]: (+)-**8m** was obtained as yellow liquid (0.73 mmol scale of reaction; 86% yield). *R<sub>f</sub>* = 0.3 (30% EtOAc in *n*-hexane).

**<sup>1</sup>H NMR** (500 MHz, CDCl<sub>3</sub>) δ 8.05 (d, *J* = 7.8 Hz, 1H), 7.99 (s, 1H), 7.35 (t, *J* = 7.6 Hz, 1H), 7.27 (s, 1H), 7.23 (t, *J* = 7.5 Hz, 1H), 7.03 (d, *J* = 7.8 Hz, 1H), 6.71 (s, 1H), 3.14 (d, *J* = 7.5 Hz, 2H), 2.60 (d, *J* = 12.6 Hz, 1H), 2.43 (d, *J* = 12.4 Hz, 1H), 2.03 (t, *J* = 10.4 Hz, 1H), 1.95 – 1.88 (m, 2H), 1.85 (s, 1H), 1.81 (d, *J* = 9.9 Hz, 1H), 1.73 – 1.66 (m, 2H), 1.39 (s, 3H), 1.35 (s, 3H).

**<sup>13</sup>C NMR** (125 MHz, CDCl<sub>3</sub>) δ 142.0, 140.1, 138.2, 133.9, 125.5, 123.6, 121.8, 119.9, 119.2, 115.4, 110.7, 110.2, 47.7, 45.1, 39.0, 37.5, 37.1, 30.8, 25.9, 22.1, 18.9, 16.5.

**IR** (neat)  $\nu_{\max}$  3000, 2866, 2369, 1760, 1498, 1245, 1123, 915, 768 cm<sup>-1</sup>.

**HRMS** (ESI) *m/z*: [M + H]<sup>+</sup> calcd. for [C<sub>23</sub>H<sub>25</sub>NO<sub>2</sub> + H]<sup>+</sup> 348.1964, found 348.1950.

[α]<sub>D</sub><sup>25</sup> = +74.5 (c = 0.5, CHCl<sub>3</sub>).

### Acetylation of Carbazole derivative (+)-**8a**:

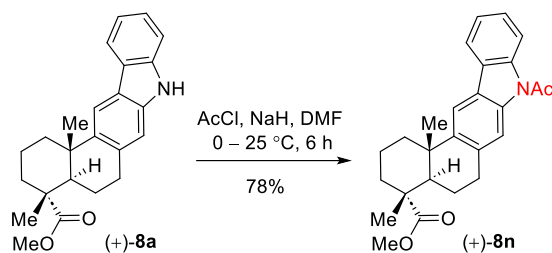

Carbazole (+)-**8a** (500 mg, 1.4 mmol, 1.0 equiv.) was taken in an oven dried round bottom flask dissolved in 9 mL of DMF maintaining N<sub>2</sub> inertness and set on an ice bath. Sodium hydride (112 mg, 2.8 mmol, 2.0 equiv.) was added in portion-wise manner to the reaction vessel and stirred for 15 min at 0 °C. Then acetyl chloride (150 μL, 2.1 mmol, 1.5 equiv.) was directly added to the solution and the reaction mixture was allowed to stir at 25 °C for 4 h until the full consumption of starting material (monitored by TLC). The reaction was quenched with excess of saturated aqueous NH<sub>4</sub>Cl solution. Then the solution was extracted with EtOAc and water. The aqueous phase was extracted with EtOAc (12 mL X 3). The combined organic layers were dried over anhydrous Na<sub>2</sub>SO<sub>4</sub> and concentrated in a rotary evaporator under vacuum. The crude product was purified by flash chromatography with 15% EtOAc in *n*-hexane to afford (+)-**8n** as white foam (440.6 mg, 78% yield).

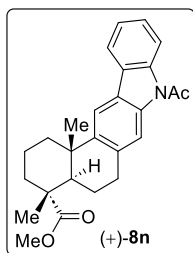

(4*R*,4*aR*,13*bS*)-methyl 8-acetyl-4,13*b*-dimethyl-2,3,4,4*a*,5,6,8,13*b*-octahydro-1*H*-naphtho[2,1-*b*]carbazole-4-carboxylate [(+)-**8n**]: Following the general procedure (+)-**8n** was obtained as white foam (1.4 mmol scale of reaction; 78% yield). *R*<sub>f</sub> = 0.3 (10% EtOAc in *n*-hexane).

**<sup>1</sup>H NMR** (500 MHz, CDCl<sub>3</sub>) δ 8.19 (d, *J* = 8.3 Hz, 1H), 7.94 (dd, *J* = 7.6, 1.4 Hz, 1H), 7.86 (s, 1H), 7.85 (s, 1H), 7.43 (ddd, *J* = 8.4, 7.2, 1.4 Hz, 1H), 7.37 – 7.34 (m, 1H), 3.69 (s, 3H), 3.11 (dd, *J* = 9.1, 4.7 Hz, 2H), 2.84 (s, 3H), 2.51 (d, *J* = 12.8 Hz, 1H), 2.31 (dd, *J* = 12.5, 2.4 Hz, 1H), 1.96 – 1.90 (m, 1H), 1.86 – 1.83 (m, 1H), 1.82 – 1.78 (m, 2H), 1.72 – 1.69 (m, 1H), 1.67 – 1.63 (m, 1H), 1.54 – 1.49 (m, 1H), 1.33 (s, 3H), 1.30 (s, 3H).

**<sup>13</sup>C NMR** (125 MHz, CDCl<sub>3</sub>) δ 179.2, 170.1, 146.0, 139.1, 137.1, 135.3, 127.0, 126.9, 124.8, 123.7, 119.5, 116.5, 116.4, 115.2, 52.1, 47.8, 45.1, 38.6, 37.6, 36.8, 31.1, 27.8, 25.6, 21.9, 18.8, 16.7.

**IR** (neat)  $\nu_{\max}$  3402, 2924, 1720, 1660, 1465, 1243, 1032, 823, 705, 528 cm<sup>-1</sup>.

**HRMS** (ESI) *m/z*: [M + H]<sup>+</sup> calcd. for [C<sub>26</sub>H<sub>29</sub>NO<sub>3</sub> + H]<sup>+</sup> 404.2226, found 404.2224.

$[\alpha]^{20}_{589} = +35.5$  (*c* = 0.2, CHCl<sub>3</sub>).

#### Tosylation of Carbazole derivative (+)-**8a**:

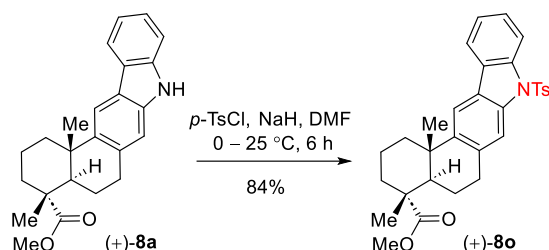

Carbazole (+)-**8a** (200 mg, 0.6 mmol, 1.0 equiv.) was taken in an oven dried round bottom flask dissolved in 4 mL of DMF maintaining N<sub>2</sub> inertness and set on an ice bath. Sodium hydride (48 mg, 1.2 mmol, 2.0 equiv.) was added in portion-wise manner to the reaction vessel and stirred for 15 min at 0 °C. Then solid *p*-toluene sulphonyl chloride (172 mg, 0.9 mmol, 1.5 equiv.) was directly added to the solution and the reaction mixture was allowed to stir at 25 °C for 4 h until the full consumption of starting material (monitored by TLC). The reaction was quenched with excess of saturated aqueous NH<sub>4</sub>Cl solution. Then the solution was extracted with EtOAc and water. The aqueous phase was extracted with EtOAc (6 mL X 3). The combined organic layers were dried over anhydrous Na<sub>2</sub>SO<sub>4</sub> and concentrated in a rotary

evaporator under vacuum. The crude product was purified by flash chromatography with 15% EtOAc in *n*-hexane to afford (+)-**8o** as white foam (259.9 mg, 84% yield).

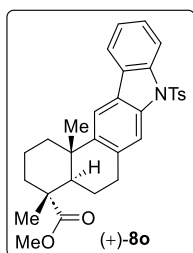

(4*R*,4*aR*,13*bS*)-methyl 4,13*b*-dimethyl-8-tosyl-2,3,4,4*a*,5,6,8,13*b*-octahydro-1*H*-naphtho[2,1-*b*]carbazole-4-carboxylate [(+)-**8o**]: (+)-**8o** was obtained as white foam (0.6 mmol scale of reaction; 84% yield).  $R_f = 0.35$  (20% EtOAc in *n*-hexane).

**<sup>1</sup>H NMR** (500 MHz, CDCl<sub>3</sub>)  $\delta$  8.26 (d,  $J = 8.4$  Hz, 1H), 7.95 (s, 1H), 7.84 (d,  $J = 7.7$  Hz, 1H), 7.75 (s, 1H), 7.69 (d,  $J = 8.0$  Hz, 2H), 7.42 (t,  $J = 7.8$  Hz, 1H), 7.31 (t,  $J = 7.6$  Hz, 1H), 7.11 (d,  $J = 8.1$  Hz, 2H), 3.70 (s, 3H), 3.13 (dd,  $J = 9.6, 6.7$  Hz, 2H), 2.45 (d,  $J = 11.8$  Hz, 1H), 2.28 (s, 3H), 2.27 (s, 1H), 1.93 (td,  $J = 12.7, 6.6$  Hz, 1H), 1.86 – 1.73 (m, 4H), 1.69 (d,  $J = 9.2$  Hz, 1H), 1.51 (dd,  $J = 11.3, 4.7$  Hz, 1H), 1.32 (s, 3H), 1.26 (s, 3H).

**<sup>13</sup>C NMR** (125 MHz, CDCl<sub>3</sub>)  $\delta$  179.1, 146.0, 144.6, 138.5, 136.6, 135.4, 135.2, 129.7, 126.8, 126.7, 126.5, 124.4, 123.6, 119.5, 115.2, 115.0, 114.7, 52.0, 47.6, 44.9, 38.4, 37.5, 36.7, 30.8, 25.5, 21.7, 21.5, 18.6, 16.6.

**IR** (neat)  $\nu_{\max}$  2921, 1710, 1598, 1368, 1182, 995, 810, 747, 668, 581 cm<sup>-1</sup>.

$[\alpha]^{25}_{589} = +139.2$  ( $c = 0.8$ , CHCl<sub>3</sub>).

### Benzylic Oxidation of Compound (+)-**8n**:

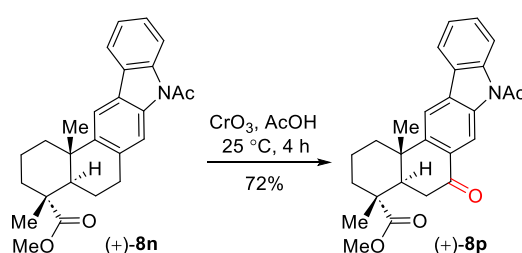

In an oven-dried round-bottom flask (+)-**8n** (425 mg, 1.05 mmol, 1.0 equiv.) was dissolved in 6 mL of acetic acid. To the reaction mixture solid CrO<sub>3</sub> (210.7 mg, 2.11 mmol, 2.0 equiv.) was added at 25 °C and stirred for 4 h. After completion of the reaction (monitored by TLC) the reaction mixture was diluted with ethyl acetate and quenched with saturated aqueous sodium bicarbonate solution. The mixture was extracted with EtOAc (12 mL X 3). The combined organic layers were washed with brine and dried over Na<sub>2</sub>SO<sub>4</sub> and concentrated under reduced pressure. Then the crude product was purified by flash chromatography with 40% EtOAc in *n*-hexane to afford (+)-**8p** as yellow foam (315.6 mg, 72% yield).

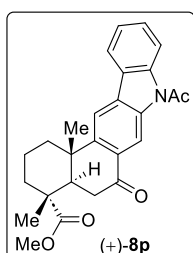

**(4*R*,4*aR*,13*bS*)-methyl 8-acetyl-4,13*b*-dimethyl-6-oxo-2,3,4,4*a*,5,6,8,13*b*-octahydro-1*H*-naphtho[2,1-*b*]carbazole-4-carboxylate [(+)-**8p**]**: (+)-**8p** was obtained as yellow foam (1.05 mmol scale of reaction; 72% yield). *R<sub>f</sub>* = 0.2 (20% EtOAc in *n*-hexane).

**<sup>1</sup>H NMR** (500 MHz, CDCl<sub>3</sub>) δ 8.62 (s, 1H), 8.46 (d, *J* = 8.4 Hz, 1H), 8.02 (d, *J* = 7.7 Hz, 1H), 7.97 (s, 1H), 7.55 (t, *J* = 7.6 Hz, 1H), 7.41 (t, *J* = 7.5 Hz, 1H), 3.68 (s, 3H), 2.92 (s, 3H), 2.80 (s, 1H), 2.57 (d, *J* = 12.0 Hz, 1H), 2.46 (d, *J* = 13.9 Hz, 1H), 1.89 (d, *J* = 7.4 Hz, 3H), 1.85 – 1.75 (m, 3H), 1.39 (s, 3H), 1.35 (s, 3H).

**<sup>13</sup>C NMR** (125 MHz, CDCl<sub>3</sub>) δ 197.9, 177.9, 170.0, 151.1, 140.9, 136.7, 131.6, 130.0, 129.3, 125.4, 124.2, 120.5, 117.5, 114.7, 114.7, 52.4, 46.9, 44.0, 38.0, 37.9, 37.7, 36.7, 27.8, 24.3, 18.4, 16.6.

**IR** (neat)  $\nu_{\max}$  3500, 2924, 1725, 1660, 1460, 1243, 1132, 823, 767, 528 cm<sup>-1</sup>.

**HRMS** (ESI) *m/z*: [M + H]<sup>+</sup> calcd. for [C<sub>26</sub>H<sub>27</sub>NO<sub>4</sub> + H]<sup>+</sup> 418.2018, found 418.2024.

[ $\alpha$ ]<sub>25</sub><sup>589</sup> = +49.6 (c = 0.5, CHCl<sub>3</sub>).

**General procedure for the synthesis of compound *epi*-(+)-8a:**

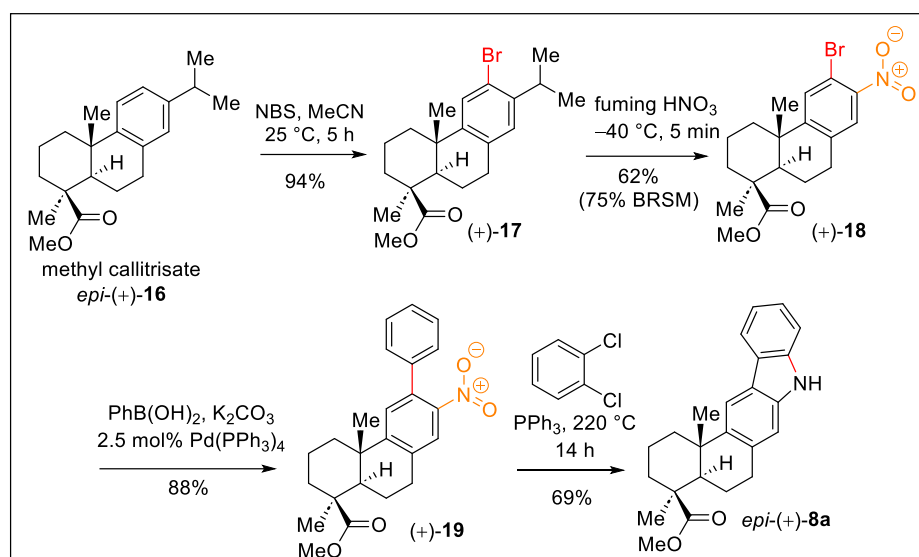

Methyl callitrisate *epi*-(+)-16<sup>2</sup> was synthesized by the following literature protocol.

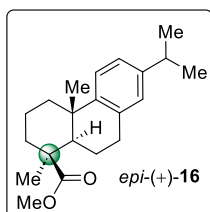

(1*S*,4*aS*,10*aR*)-methyl 7-isopropyl-1,4*a*-dimethyl-1,2,3,4,4*a*,9,10,10*a*-octahydrophenanthrene-1-carboxylate [*epi*-(+)-16]: Following the general procedure *epi*-(+)-16 was obtained as white solid (130 mmol scale of reaction; 12% overall yield from abietic acid). *R<sub>f</sub>* = 0.6 (5% EtOAc in *n*-hexane).

<sup>1</sup>H NMR (400 MHz, CDCl<sub>3</sub>) δ 7.22 (d, *J* = 8.2 Hz, 1H), 7.03 (dd, *J* = 8.0, 2.1 Hz, 1H), 6.93 (d, *J* = 1.9 Hz, 1H), 3.69 (s, 3H), 2.96 – 2.77 (m, 3H), 2.30 (td, *J* = 8.6, 4.3 Hz, 2H), 2.25 – 2.18 (m, 1H), 2.08 – 1.97 (m, 2H), 1.66 (dq, *J* = 14.4, 3.6 Hz, 1H), 1.58 (dd, *J* = 12.2, 1.8 Hz, 1H), 1.44 (dd, *J* = 13.4, 4.2 Hz, 1H), 1.31 (s, 3H), 1.27 (s, 3H), 1.25 (s, 3H), 1.13 (dd, *J* = 13.7, 4.3 Hz, 1H), 1.07 (s, 3H).



$^{13}\text{C}$  NMR (100 MHz,  $\text{CDCl}_3$ )  $\delta$  178.0, 145.7, 145.6, 135.1, 126.9, 125.6, 124.1, 77.5, 53.0, 51.3, 44.1, 39.5, 38.3, 37.8, 33.5, 32.2, 28.7, 24.1, 23.1, 21.2, 20.1.

IR (neat)  $\nu_{\text{max}}$  2958, 2957, 2866, 2369, 1726, 1498, 1243, 1121, 915, 768  $\text{cm}^{-1}$ .

$[\alpha]_{\text{D}}^{25} = +73.9$  ( $c = 2.1$ ,  $\text{CHCl}_3$ ); lit.<sup>2</sup>  $[\alpha]_{\text{D}}^{25} = +137$  ( $c = 0.642$ ,  $\text{EtOH}$ ).

### Aromatic Electrophilic Bromination of *epi*-(+)-**16**:

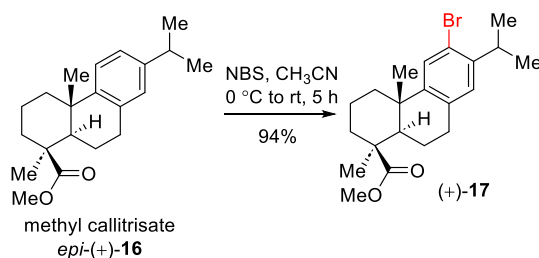

In an oven dried round-bottom flask *epi*-(+)-**16** (8.0 g, 25.5 mmol, 1.0 equiv.) was taken in 108 mL of  $\text{CH}_3\text{CN}$ . To the reaction mixture NBS (5.44 g, 30.6 mmol, 1.2 equiv.) was added at 25  $^\circ\text{C}$  and stirred at the same temperature for 5 h. After completion of the reaction (monitored by TLC), saturated aqueous  $\text{Na}_2\text{S}_2\text{O}_3$  solution was added to the reaction mixture. The reaction mixture was then partitioned and extracted with  $\text{EtOAc}$  (50 mL X 3). The combined organic layers were concentrated in a rotary evaporator under reduced pressure and crude product was purified through column chromatography with 5%  $\text{EtOAc}$  in *n*-hexane to afford (+)-**17** as yellow gel (9.4 g, 94% yield).

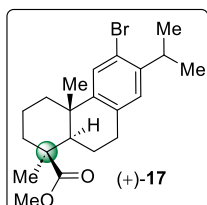

(1*S*,4*aS*,10*aR*)-methyl 6-bromo-7-isopropyl-1,4*a*-dimethyl-1,2,3,4,4*a*,9,10,10*a*-octahydrophenanthrene-1-carboxylate [(+)-**17**]: Following the general procedure (+)-**17** was obtained as yellow gel (25.5 mmol scale of reaction; 94% yield).  $R_f = 0.75$  (5%  $\text{EtOAc}$  in *n*-hexane).

**<sup>1</sup>H NMR** (500 MHz, CDCl<sub>3</sub>) δ 7.39 (s, 1H), 6.93 (s, 1H), 3.66 (s, 4H), 3.26 (p, *J* = 6.9 Hz, 1H), 2.86 (ddd, *J* = 16.9, 5.6, 1.8 Hz, 1H), 2.73 (td, *J* = 11.9, 11.1, 6.3 Hz, 1H), 2.28 (d, *J* = 13.7 Hz, 1H), 2.22 – 2.16 (m, 2H), 1.98 (td, *J* = 8.7, 7.9, 4.5 Hz, 2H), 1.64 – 1.61 (m, 1H), 1.53 – 1.47 (m, 2H), 1.37 (dd, *J* = 13.4, 3.9 Hz, 1H), 1.27 (s, 3H), 1.23 (s, 3H), 1.20 (s, 3H), 1.02 (s, 3H).

**<sup>13</sup>C NMR** (125 MHz, CDCl<sub>3</sub>) δ 177.8, 147.7, 144.0, 134.9, 129.9, 127.1, 121.7, 52.6, 51.3, 44.0, 39.4, 38.3, 37.7, 32.4, 31.7, 28.6, 23.1, 23.0, 22.9, 21.0, 20.0.

**IR** (neat)  $\nu_{\max}$  3015, 1842, 1798, 1641, 1495, 1381, 1332, 1201, 1105, 978, 703 cm<sup>-1</sup>.

$[\alpha]_{589}^{25} = +296.9$  (c = 0.8, CHCl<sub>3</sub>).

#### ***Ips*-nitration of (+)-**17**:**

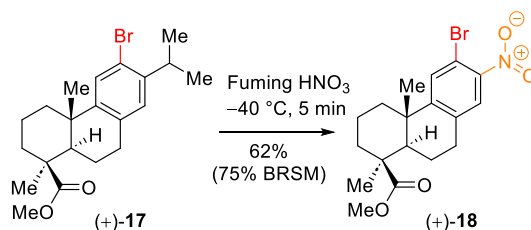

In an oven-dried round-bottom flask 4 mL of fuming nitric acid was taken and set at -40 °C. Then solid compound (+)-**17** (800 mg, 2.03 mmol, 1.0 equiv.) was directly charged into the previously cooled fuming nitric acid system and the whole solution was scratched well with a spatula maintaining the -40 °C temperature. After scratching the solution for 5 minutes, the reaction was quenched with excess of water. The reaction mixture was then partitioned between water and dichloromethane. The organic layer was then washed with saturated bicarbonate solution. The organic layer was dried over Na<sub>2</sub>SO<sub>4</sub> and concentrated under reduced pressure. The crude product was then purified by column chromatography with 15% EtOAc in *n*-hexane to afford (+)-**18** as yellow foam [602.8 mg, 75% yield (brsm)].

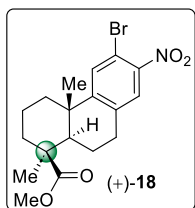

(1*S*,4*aS*,10*aR*)-methyl 6-bromo-1,4*a*-dimethyl-7-nitro-1,2,3,4,4*a*,9,10,10*a*-octahydrophenanthrene-1-carboxylate [(+)-18]: (+)-18 was obtained as yellow foam (2.03 mmol scale of reaction; 75% yield).  $R_f = 0.4$  (10% EtOAc in *n*-hexane).

$^1\text{H NMR}$  (500 MHz,  $\text{CDCl}_3$ )  $\delta$  7.59 (s, 1H), 7.58 (s, 1H), 3.68 (s, 3H), 2.96 – 2.91 (m, 1H), 2.81 – 2.73 (m, 1H), 2.30 (dt,  $J = 13.7, 3.6$  Hz, 1H), 2.24 (ddd,  $J = 10.7, 8.6, 5.3$  Hz, 2H), 2.03 – 1.95 (m, 2H), 1.70 – 1.65 (m, 1H), 1.50 (dd,  $J = 12.4, 1.8$  Hz, 1H), 1.38 (dd,  $J = 13.2, 4.2$  Hz, 1H), 1.29 (s, 3H), 1.11 (dd,  $J = 13.6, 4.3$  Hz, 1H), 1.05 – 1.02 (m, 3H).

$^{13}\text{C NMR}$  (125 MHz,  $\text{CDCl}_3$ )  $\delta$  177.5, 154.9, 136.7, 132.8, 126.4, 125.7, 111.4, 52.0, 51.6, 44.1, 39.2, 39.2, 37.4, 31.4, 28.6, 23.0, 20.5, 19.9.

**IR** (neat)  $\nu_{\text{max}}$  2932, 1721, 1527, 1450, 1365, 1248, 1112, 981, 883, 734  $\text{cm}^{-1}$ .

**HRMS** (ESI)  $m/z$ :  $[\text{M} + \text{Na}]^+$  calcd. for  $[\text{C}_{18}\text{H}_{22}\text{BrNO}_4 + \text{Na}]^+$  418.0630, found 418.0624.

$[\alpha]_{\text{D}}^{25} = +52.6$  ( $c = 0.1$ ,  $\text{CHCl}_3$ ).

### Suzuki-Miyaura Coupling of (+)-18 with Phenylboronic acid:

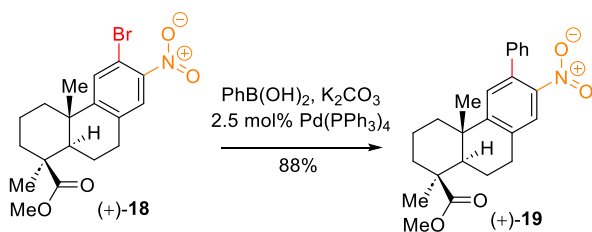

In an oven-dried round-bottom flask, compound (+)-18 (6.6 g, 16.7 mmol, 1 equiv.) was taken in 55 mL mixed solvent system of benzene: ethanol: water (2:1:1) equipped with a magnetic stir-bar. Then phenylboronic acid (2.44 g, 20.0 mmol, 1.2 equiv.) and potassium carbonate (4.6 g, 33.4 mmol, 2 equiv.) were directly added to the reaction mixture. After the complete

dissolution of the solid materials the reaction mixture was degassed for 10 mins using N<sub>2</sub> gas balloon. Then tetrakis(triphenylphosphine)palladium(0) (386.3 mg, 0.33 mmol, 0.02 equiv.) was rapidly added and the reaction mixture was allowed to reflux at 100 °C on a preheated oil-bath for 8 h maintaining N<sub>2</sub> inertness until the full consumption of starting material (monitored by TLC). The mixture was cooled and was poured into an aqueous ammonium chloride solution. The mixture was extracted with 20% EtOAc in *n*-hexane (25 mL X 3). The combined organic layers were washed with brine (20 mL X 1), dried over Na<sub>2</sub>SO<sub>4</sub> and concentrated in a rotary evaporator under reduced pressure. Now the crude product was purified by flash chromatography with 25% EtOAc in *n*-hexane to afford (+)-**19** as yellow foam (5.8 g, 88% yield).

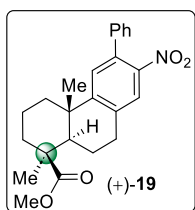

**(1*S*,4*aS*,10*aR*)-methyl 1,4*a*-dimethyl-7-nitro-6-phenyl-1,2,3,4,4*a*,9,10,10*a*-octahydrophenanthrene-1-carboxylate [(+)-**19**]**: (+)-**19** was obtained as yellow foam (16.7 mmol scale of reaction; 88% yield). *R<sub>f</sub>* = 0.4 (10% EtOAc in *n*-hexane).

**<sup>1</sup>H NMR** (500 MHz, CDCl<sub>3</sub>) δ 7.59 (s, 1H), 7.42 – 7.36 (m, 3H), 7.30 – 7.25 (m, 3H), 3.68 (s, 3H), 3.05 – 2.98 (m, 1H), 2.91 – 2.83 (m, 1H), 2.34 – 2.21 (m, 4H), 2.07 – 1.97 (m, 2H), 1.47 – 1.39 (m, 1H), 1.30 (s, 3H), 1.27 – 1.24 (m, 1H), 1.15 – 1.09 (m, 1H), 1.07 (s, 3H).

**<sup>13</sup>C NMR** (125 MHz, CDCl<sub>3</sub>) δ 177.7, 153.3, 146.6, 138.2, 136.4, 134.0, 129.7, 128.7, 128.1, 128.0, 124.8, 124.2, 120.9, 52.4, 51.6, 44.1, 39.3, 39.1, 37.5, 31.6, 28.6, 23.1, 20.7, 19.9.

**IR** (neat)  $\nu_{\max}$  3015, 1842, 1798, 1641, 1495, 1381, 1332, 1201, 1105, 978, 703 cm<sup>-1</sup>.

$[\alpha]_{589}^{25} = +95.0$  (c = 0.3, CHCl<sub>3</sub>).

## Cadogan Reaction of (+)-**19**:

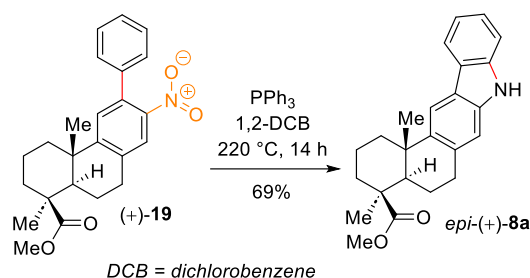

In an oven-dried round-bottom flask compound (+)-**19** (5.5 g, 14.0 mmol, 1.0 equiv.) was taken in 30 mL of 1, 2-dichlorobenzene maintaining N<sub>2</sub> inertness. Then to the reaction mixture solid triphenyl phosphine (11.0 g, 41.9 mmol, 3.0 equiv.) was added and refluxed at 220 °C on a preheated oil-bath for 14 h until the full consumption of starting material (monitored by TLC). Now the crude product was purified by flash chromatography with 25% EtOAc in *n*-hexane to afford *epi*-(+)-**8a** as white foam (3.5 g, 69% yield).

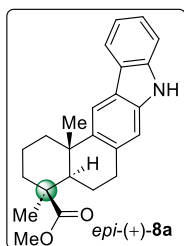

(4*S*,4*aR*,13*bS*)-methyl 4,13*b*-dimethyl-2,3,4,4*a*,5,6,8,13*b*-octahydro-1*H*-naphtho[2,1-*b*]carbazole-4-carboxylate [*epi*-(+)-**8a**]: *epi*-(+)-**8a** was obtained as white foam (14.0 mmol scale of reaction; 69% yield).  $R_f = 0.35$  (10% EtOAc in *n*-hexane).

**<sup>1</sup>H NMR** (500 MHz, CDCl<sub>3</sub>)  $\delta$  8.02 (d,  $J = 7.8$  Hz, 1H), 8.00 (s, 1H), 7.80 (s, 1H), 7.38 – 7.35 (m, 1H), 7.32 (d,  $J = 8.0$  Hz, 1H), 7.22 – 7.18 (m, 1H), 7.02 (s, 1H), 3.71 (s, 3H), 3.14 – 3.07 (m, 1H), 3.06 – 2.96 (m, 1H), 2.53 (d,  $J = 13.0$  Hz, 1H), 2.34 (d,  $J = 13.7$  Hz, 1H), 2.31 – 2.24 (m, 1H), 2.10 (ddd,  $J = 17.7, 8.2, 4.8$  Hz, 2H), 1.72 (tt,  $J = 7.5, 3.1$  Hz, 1H), 1.67 (dd,  $J = 12.2, 1.9$  Hz, 1H), 1.58 – 1.51 (m, 1H), 1.34 (s, 3H), 1.30 – 1.27 (m, 1H), 1.16 (s, 3H).

**<sup>13</sup>C NMR** (125 MHz, CDCl<sub>3</sub>)  $\delta$  178.2, 140.4, 140.2, 138.2, 134.2, 125.5, 123.7, 122.2, 120.0, 119.2, 117.0, 110.5, 109.8, 53.4, 51.4, 44.2, 40.5, 38.8, 37.9, 33.1, 28.8, 24.0, 21.4, 20.3.

IR (neat)  $\nu_{\max}$  3402, 2926, 1720, 1465, 1243, 1023, 823, 750, 582  $\text{cm}^{-1}$ .

HRMS (ESI)  $m/z$ :  $[\text{M} + \text{Na}]^+$  calcd. for  $[\text{C}_{24}\text{H}_{27}\text{NO}_2 + \text{Na}]^+$  362.2120, found 362.2108.

$[\alpha]_{589}^{25} = +95.1$  ( $c = 0.8$ ,  $\text{CHCl}_3$ ).

### Substrate (Deoxy-oridamycin derivatives) preparation for Oxidative Dimerization:

#### Methylation of Carbazole derivative *epi*-(+)-**8a**:

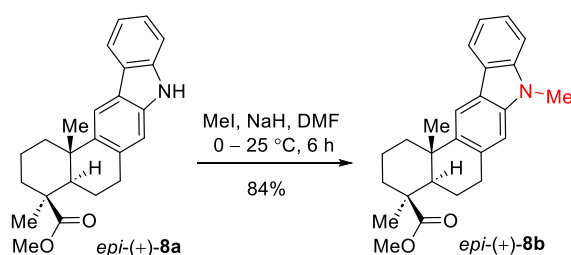

Carbazole *epi*-(+)-**8a** (230 mg, 0.64 mmol, 1.0 equiv.) was taken in an oven dried round bottom flask dissolved in 4 mL of DMF maintaining  $\text{N}_2$  inertness and set on an ice bath. Sodium hydride (50.9 mg, 1.27 mmol, 2.0 equiv.) was added in portion-wise manner to the reaction vessel and stirred for 15 min at 0 °C. Then iodomethane (60.6  $\mu\text{L}$ , 0.96 mmol, 1.5 equiv.) was directly added to the solution and the reaction mixture was allowed to stir at 25 °C for 4 h until the full consumption of starting material (monitored by TLC). The reaction was quenched with excess of saturated aqueous  $\text{NH}_4\text{Cl}$  solution. Then the solution was extracted with EtOAc and water. The aqueous phase was extracted with EtOAc (6 mL X 3). The combined organic layers were dried over anhydrous  $\text{Na}_2\text{SO}_4$  and concentrated in a rotary evaporator under vacuum. The crude product was purified by flash chromatography with 10% EtOAc in *n*-hexane to afford *epi*-(+)-**8b** as colourless gel (201.7 mg, 84% yield).

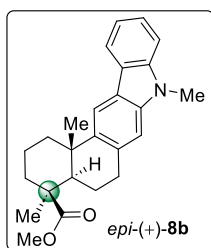

(4*S*,4*aR*,13*bS*)-methyl 4,8,13*b*-trimethyl-2,3,4,4*a*,5,6,8,13*b*-octahydro-1*H*-naphtho[2,1-*b*]carbazole-4-carboxylate [*epi*-(+)-**8b**]: *epi*-(+)-**8b** was obtained as colourless gel (0.64 mmol scale of reaction; 84% yield).  $R_f = 0.6$  (10% EtOAc in *n*-hexane).

**<sup>1</sup>H NMR** (500 MHz, CDCl<sub>3</sub>)  $\delta$  8.05 (dt,  $J = 7.7, 0.9$  Hz, 1H), 8.04 (s, 1H), 7.45 – 7.41 (m, 1H), 7.34 (d,  $J = 8.1$  Hz, 1H), 7.23 – 7.19 (m, 1H), 7.06 (s, 1H), 3.78 (s, 3H), 3.72 (s, 3H), 3.22 – 3.15 (m, 1H), 3.11 – 3.05 (m, 1H), 2.55 (d,  $J = 13.2$  Hz, 1H), 2.35 (dd,  $J = 13.6, 3.0$  Hz, 1H), 2.32 – 2.26 (m, 1H), 2.19 – 2.07 (m, 3H), 1.75 – 1.71 (m, 1H), 1.69 (dd,  $J = 12.2, 1.9$  Hz, 1H), 1.54 (dd,  $J = 13.4, 4.0$  Hz, 1H), 1.35 (s, 3H), 1.18 (s, 3H).

**<sup>13</sup>C NMR** (125 MHz, CDCl<sub>3</sub>)  $\delta$  178.1, 141.6, 139.8, 139.7, 134.0, 125.3, 123.1, 121.6, 120.0, 118.6, 117.1, 108.3, 107.7, 53.5, 51.4, 44.2, 40.5, 38.8, 37.9, 33.4, 29.0, 28.8, 24.0, 21.5, 20.3.

**IR** (neat)  $\nu_{\max}$  3350, 2974, 1740, 1465, 1310, 1250, 1023, 853, 750, 665 cm<sup>-1</sup>.

**HRMS** (ESI)  $m/z$ :  $[M + H]^+$  calcd. for  $[C_{25}H_{29}NO_2 + H]^+$  376.2277, found 376.2278.

$[\alpha]_{589}^{25} = +40.2$  ( $c = 1.0$ , CHCl<sub>3</sub>).

### Benylation of Carbazole derivative *epi*-(+)-**8a**:

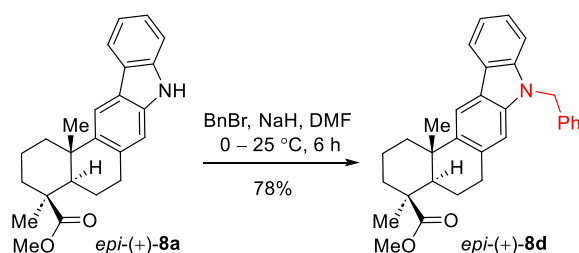

Carbazole *epi*-(+)-**8a** (255 mg, 0.71 mmol, 1.0 equiv.) was taken in an oven dried round bottom flask dissolved in 6 mL of DMF maintaining N<sub>2</sub> inertness and set on an ice bath. Sodium hydride (56.4 mg, 1.41 mmol, 2.0 equiv.) was added in portion-wise manner to the reaction vessel and stirred for 15 min at 0 °C. Then benzyl bromide (126.5  $\mu$ L, 1.07 mmol, 1.5 equiv.) was directly added to the solution and the reaction mixture was allowed to stir at 25 °C for 4 h until the full consumption of starting material (monitored by TLC). The reaction was quenched with excess of saturated aqueous NH<sub>4</sub>Cl solution. Then the solution was extracted with EtOAc

and water. The aqueous phase was extracted with EtOAc (6 mL X 3). The combined organic layers were dried over anhydrous Na<sub>2</sub>SO<sub>4</sub> and concentrated in a rotary evaporator under vacuum. The crude product was purified by flash chromatography with 10% EtOAc in *n*-hexane to afford *epi*-(+)-**8d** as colourless gel (250.1 mg, 78% yield).

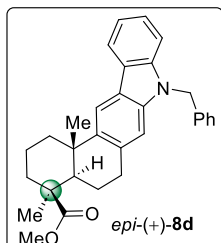

(4*S*,4*aR*,13*bS*)-methyl 8-benzyl-4,13*b*-dimethyl-2,3,4,4*a*,5,6,8,13*b*-octahydro-1*H*-naphtho[2,1-*b*]carbazole-4-carboxylate [*epi*-(+)-**8d**]: *epi*-(+)-**8d** was obtained as colourless gel (0.71 mmol scale of reaction; 78% yield). *R<sub>f</sub>* = 0.6 (10% EtOAc in *n*-hexane).

**<sup>1</sup>H NMR** (500 MHz, CDCl<sub>3</sub>) δ 8.11 – 8.09 (m, 1H), 8.08 (s, 1H), 7.44 – 7.41 (m, 1H), 7.40 – 7.37 (m, 1H), 7.30 (d, *J* = 1.0 Hz, 1H), 7.28 (d, *J* = 2.3 Hz, 1H), 7.27 (d, *J* = 0.8 Hz, 1H), 7.23 (d, *J* = 7.9 Hz, 1H), 7.19 (d, *J* = 1.9 Hz, 1H), 7.17 (d, *J* = 1.8 Hz, 1H), 7.03 (s, 1H), 5.43 (s, 2H), 3.72 (s, 3H), 3.14 – 3.09 (m, 1H), 3.06 – 2.98 (m, 1H), 2.57 (d, *J* = 13.1 Hz, 1H), 2.38 – 2.34 (m, 1H), 2.29 – 2.24 (m, 1H), 2.15 – 2.08 (m, 2H), 1.77 – 1.73 (m, 1H), 1.69 – 1.66 (m, 1H), 1.62 – 1.56 (m, 1H), 1.34 (s, 3H), 1.32 – 1.30 (m, 1H), 1.20 (d, *J* = 1.4 Hz, 3H).

**<sup>13</sup>C NMR** (125 MHz, CDCl<sub>3</sub>) δ 178.1, 141.2, 140.2, 139.4, 137.6, 134.2, 128.8, 127.4, 126.5, 126.5, 125.5, 123.3, 121.8, 120.1, 119.0, 117.2, 108.8, 108.1, 53.4, 51.3, 46.6, 44.2, 40.4, 38.8, 37.8, 33.3, 28.7, 24.0, 21.4, 20.3.

**IR** (neat)  $\nu_{\max}$  3450, 2942, 1751, 1624, 1476, 1356, 1258, 1004, 924, 876, 762, 632 cm<sup>-1</sup>.

**HRMS** (ESI) *m/z*: [M + H]<sup>+</sup> calcd. for [C<sub>31</sub>H<sub>33</sub>NO<sub>2</sub> + H]<sup>+</sup> 452.2589, found 452.2592.

[ $\alpha$ ]<sup>25</sup><sub>589</sub> = +28.2 (c = 1.6, CHCl<sub>3</sub>).



### Procedure for the Synthesis of Alcohol *epi*-(+)-**8h**:

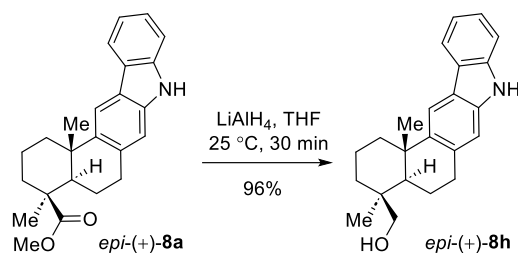

To a stirred solution *epi*-(+)-**8a** (252 mg, 0.7 mmol, 1.0 equiv.) in tetrahydrofuran (4 mL), lithium aluminum hydride (26.8 mg, 0.70 mmol, 1.01 equiv.) was added at 0 °C, and the reaction mixture was stirred for 30 min at 25 °C. Distilled water (0.5 mL), 1M aq. NaOH (1 M, 1.0 mL), and distilled water (0.5 mL) was sequentially added at 0 °C and the resulting mixture was warmed to 25 °C. Dried over sodium sulfate and filtered over a pad of celite and washed with ethyl acetate. The combined organic layer was concentrated under reduced pressure, and the resulting crude residue was purified by flash column chromatography on silica gel with ~30-40% EtOAc in *n*-hexane to provide compound *epi*-(+)-**8h** as colourless gel (224.1 mg, 96%).

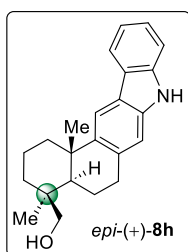

((4*S*,4*aR*,13*bS*)-**4,13b-dimethyl-2,3,4,4a,5,6,8,13b-octahydro-1H-naphtho[2,1-b]carbazol-4-yl**)methanol [*epi*-(+)-**8h**]: *epi*-(+)-**8h** was obtained as colourless gel (0.7 mmol scale of reaction; 96% yield).  $R_f = 0.3$  (20% EtOAc in *n*-hexane).

$^1\text{H NMR}$  (500 MHz,  $\text{CDCl}_3$ )  $\delta$  8.02 (d,  $J = 7.8$  Hz, 1H), 7.97 (s, 1H), 7.81 (s, 1H), 7.37 – 7.32 (m, 2H), 7.19 (ddd,  $J = 8.0, 6.5, 1.6$  Hz, 1H), 7.04 (s, 1H), 3.93 (d,  $J = 11.0$  Hz, 1H), 3.61 (d,  $J = 11.0$  Hz, 1H), 3.16 – 3.10 (m, 1H), 3.05 (ddd,  $J = 17.4, 11.2, 7.3$  Hz, 1H), 2.57 (d,  $J = 12.4$  Hz, 1H), 2.08 – 2.02 (m, 1H), 1.96 – 1.92 (m, 1H), 1.81 (ddd,  $J = 13.8, 8.0, 4.2$  Hz, 2H), 1.72 (tdd,  $J = 14.0, 7.0, 3.5$  Hz, 2H), 1.62 (dd,  $J = 13.0, 2.7$  Hz, 2H), 1.28 (s, 3H), 1.10 (s, 3H).

$^{13}\text{C}$  NMR (125 MHz,  $\text{CDCl}_3$ )  $\delta$  142.3, 140.2, 138.2, 133.7, 125.4, 123.8, 122.0, 120.0, 119.2, 115.9, 110.5, 109.9, 65.5, 51.7, 39.9, 38.9, 38.1, 35.4, 31.8, 27.0, 26.6, 19.5, 19.3.

IR (neat)  $\nu_{\text{max}}$  3610, 3365, 1720, 1465, 1243, 1085, 876, 720, 552  $\text{cm}^{-1}$ .

HRMS (ESI)  $m/z$ :  $[\text{M} + \text{H}]^+$  calcd. for  $[\text{C}_{23}\text{H}_{27}\text{NO} + \text{H}]^+$  334.2171, found 334.2172.

$[\alpha]^{25}_{589} = +78.4$  ( $c = 0.5$ ,  $\text{CHCl}_3$ ).

### Reduction of *N*-Benzyl Carbazole derivative *epi*-(+)-**8d**:

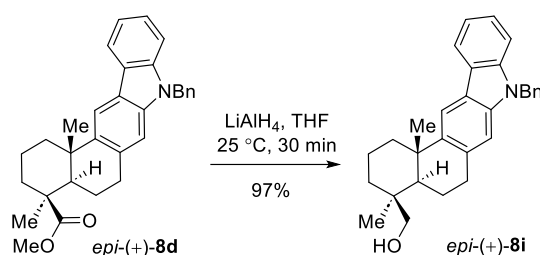

To a stirred solution *epi*-(+)-**8d** (225 mg, 0.5 mmol, 1 equiv.) in tetrahydrofuran (4 mL), lithium aluminum hydride (19.1 mg, 0.5 mmol, 1.01 equiv.) was added at  $0\text{ }^\circ\text{C}$ , and the reaction mixture was stirred for 30 min at  $25\text{ }^\circ\text{C}$ . Distilled water (0.5 mL), 1M aq. NaOH (1 M, 1.0 mL), and distilled water (0.5 mL) was sequentially added at  $0\text{ }^\circ\text{C}$  and the resulting mixture was warmed to  $25\text{ }^\circ\text{C}$ . Dried over sodium sulfate and filtered over a pad of celite and washed with ethyl acetate. The combined organic layer was concentrated under reduced pressure, and the resulting crude residue was purified by flash column chromatography on silica gel with ~20-30% EtOAc in *n*-hexane to provide compound *epi*-(+)-**8i** as colourless gel (205.4 mg, 97%).

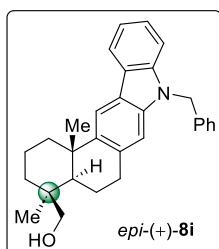

((4*S*,4*aR*,13*bS*)-8-benzyl-4,13*b*-dimethyl-2,3,4,4*a*,5,6,8,13*b*-octahydro-1*H*-naphtho[2,1-*b*]carbazol-4-yl)methanol [*epi*-(+)-**8i**]: *epi*-(+)-**8i** was obtained as colourless gel (0.5 mmol scale of reaction; 97% yield).  $R_f = 0.2$  (10% EtOAc in *n*-hexane).

**<sup>1</sup>H NMR** (500 MHz, CDCl<sub>3</sub>)  $\delta$  8.07 (d,  $J = 8.0$  Hz, 1H), 8.02 (d,  $J = 3.2$  Hz, 1H), 7.42 – 7.35 (m, 2H), 7.21 (d,  $J = 8.6$  Hz, 2H), 7.16 (d,  $J = 6.5$  Hz, 3H), 7.01 (s, 1H), 5.43 (s, 2H), 3.96 – 3.91 (m, 1H), 3.62 (dd,  $J = 18.4, 10.1$  Hz, 2H), 3.12 (dd,  $J = 17.8, 6.3$  Hz, 1H), 3.04 (q,  $J = 8.8$  Hz, 1H), 2.59 (d,  $J = 12.8$  Hz, 1H), 2.04 (d,  $J = 11.8$  Hz, 1H), 1.95 (s, 1H), 1.79 (t,  $J = 13.6$  Hz, 2H), 1.69 (s, 1H), 1.62 (d,  $J = 11.9$  Hz, 2H), 1.29 (s, 3H), 1.08 (d,  $J = 3.1$  Hz, 3H).

**<sup>13</sup>C NMR** (125 MHz, CDCl<sub>3</sub>)  $\delta$  142.0, 141.3, 139.4, 137.6, 133.8, 128.9, 127.5, 126.6, 126.6, 125.5, 121.7, 120.1, 119.0, 116.0, 108.8, 108.2, 65.5, 51.7, 46.6, 39.9, 38.9, 38.1, 35.4, 32.0, 27.0, 26.6, 19.6, 19.3.

**IR** (neat)  $\nu_{\max}$  3612, 3346, 1756, 1453, 1248, 1067, 935, 752, 663 cm<sup>-1</sup>.

**HRMS** (ESI)  $m/z$ :  $[M + H]^+$  calcd. for [C<sub>30</sub>H<sub>33</sub>NO + H]<sup>+</sup> 424.2640, found 424.2634.

$[\alpha]^{25}_{589} = +31.1$  ( $c = 0.3$ , CHCl<sub>3</sub>).

#### Tosylation of Carbazole derivative *epi*-(+)-**8a**:

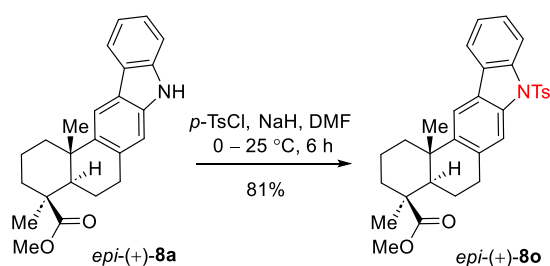

Carbazole *epi*-(+)-**8a** (200 mg, 0.6 mmol, 1.0 equiv.) was taken in an oven dried round bottom flask dissolved in 4 mL of DMF maintaining N<sub>2</sub> inertness and set on an ice bath. Sodium hydride (48 mg, 1.2 mmol, 2.0 equiv.) was added in portion-wise manner to the reaction vessel and stirred for 15 min at 0 °C. Then solid *p*-toluene sulphonyl chloride (172 mg, 0.9 mmol, 1.5 equiv.) was directly added to the solution and the reaction mixture was allowed to stir at 25 °C for 4 h until the full consumption of starting material (monitored by TLC). The reaction was

quenched with excess of saturated aqueous  $\text{NH}_4\text{Cl}$  solution. Then the solution was extracted with EtOAc and water. The aqueous phase was extracted with EtOAc (6 mL X 3). The combined organic layers were dried over anhydrous  $\text{Na}_2\text{SO}_4$  and concentrated in a rotary evaporator under vacuum. The crude product was purified by flash chromatography with 15% EtOAc in *n*-hexane to afford *epi*-(+)-**8o** as white foam (250.6 mg, 81% yield).

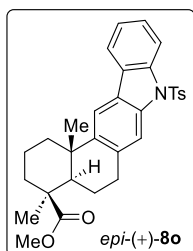

(4*S*,4*aR*,13*bS*)-methyl 4,13*b*-dimethyl-8-tosyl-2,3,4,4*a*,5,6,8,13*b*-octahydro-1*H*-naphtho[2,1-*b*]carbazole-4-carboxylate [*epi*-(+)-**8o**]: Following the general procedure *epi*-(+)-**8o** was obtained as white foam (0.6 mmol scale of reaction; 81% yield).  $R_f = 0.5$  (20% EtOAc in *n*-hexane).

$^1\text{H NMR}$  (500 MHz,  $\text{CDCl}_3$ )  $\delta$  8.25 (d,  $J = 8.3$  Hz, 1H), 7.97 (s, 1H), 7.85 – 7.81 (m, 1H), 7.79 (s, 1H), 7.70 (d,  $J = 8.4$  Hz, 2H), 7.41 (ddd,  $J = 8.5, 7.3, 1.3$  Hz, 1H), 7.30 (td,  $J = 7.5, 1.0$  Hz, 1H), 7.09 (d,  $J = 8.2$  Hz, 2H), 3.68 (s, 3H), 3.16 (ddd,  $J = 17.2, 5.3, 1.8$  Hz, 1H), 3.07 – 2.98 (m, 1H), 2.44 – 2.38 (m, 1H), 2.31 (dd,  $J = 14.2, 3.7$  Hz, 1H), 2.25 (s, 4H), 2.12 – 2.02 (m, 2H), 1.70 – 1.65 (m, 1H), 1.63 (dd,  $J = 12.4, 1.8$  Hz, 1H), 1.46 (td,  $J = 12.8, 12.2, 3.5$  Hz, 1H), 1.32 (s, 3H), 1.27 (ddd,  $J = 11.3, 5.8, 3.1$  Hz, 1H), 1.10 (s, 3H).

$^{13}\text{C NMR}$  (125 MHz,  $\text{CDCl}_3$ )  $\delta$  177.9, 144.6, 144.5, 138.5, 136.6, 135.8, 135.3, 129.6, 126.8, 126.69, 126.5, 124.6, 123.7, 119.6, 116.8, 115.0, 114.6, 52.8, 51.3, 44.1, 40.0, 38.7, 37.6, 33.2, 28.6, 23.6, 21.5, 21.1, 20.1.

**IR** (neat)  $\nu_{\text{max}}$  2921, 1710, 1598, 1368, 1182, 995, 810, 747, 668, 581  $\text{cm}^{-1}$ .

$[\alpha]^{25}_{589} = +78.8$  ( $c = 0.8, \text{CHCl}_3$ ).

## General procedure for the synthesis of compound (+)-24:

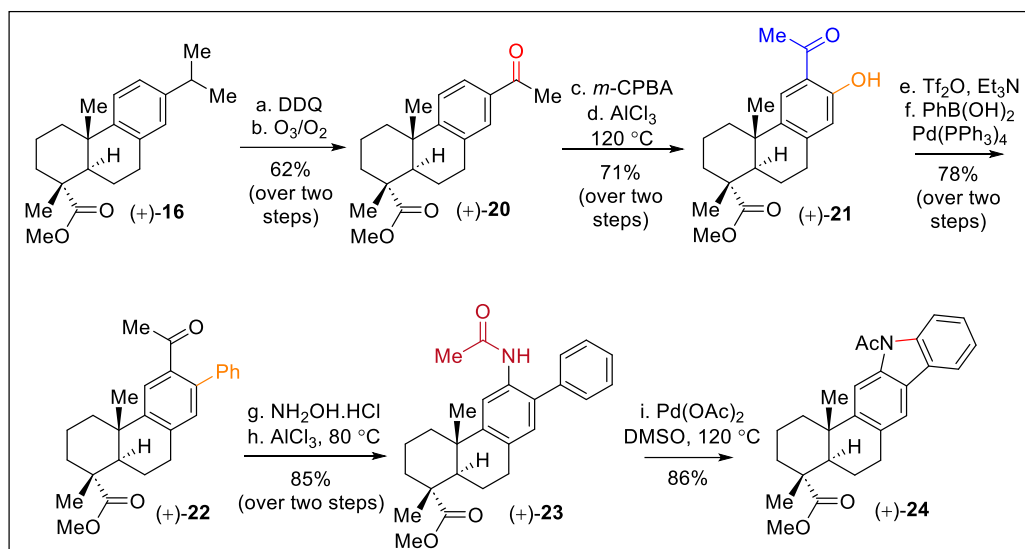

## Synthesis of Acetophenone derivative (+)-20:

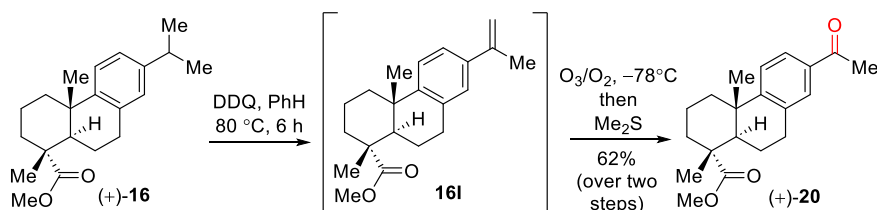

A solution of Methyl dehydroabietate (+)-**16** (10 g, 31.8 mmol, 1.0 equiv.) and dichloro dicyano quinone (8.7 g, 38.2 mmol, 1.2 equiv.) in benzene was refluxed at 80 °C for 6 h under N<sub>2</sub> atmosphere. Then, the mixture was cooled and filtered through a short pad of Celite 512 washing with 15 mL of fresh benzene and concentrated to give the crude alkene-ester **16I** (8.6 g) as a brown semisolid which was used in the next step without further purification (same R<sub>f</sub>).

The crude alkene-ester **16I** (8.6 g) obtained above was dissolved in a 5:1 mixture of CH<sub>2</sub>Cl<sub>2</sub>:MeOH (36 mL). An ozone stream was bubbled through this suspension at -78 °C until complete consumption of **16I** was observed by TLC analysis. Then Dimethyl sulfide (DMS) (4 mL) was added, and the reaction mixture was warmed to room temperature over four hours. The solvent was removed in vacuo and after evaporation of the solvent the residue was purified by flash column chromatography with ~15-20% EtOAc in *n*-hexane to afford (+)-**20** as colourless gel (6.2 g, 62%).

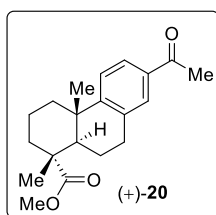

(1*R*,4*aS*,10*aR*)-methyl

7-acetyl-1,4*a*-dimethyl-1,2,3,4,4*a*,9,10,10*a*-

octahydrophenanthrene-1-carboxylate [(+)-20]: (+)-20 was obtained as colorless gel (31.8 mmol scale of reaction; 62% yield).  $R_f = 0.35$  (10% EtOAc in *n*-hexane).

$^1\text{H NMR}$  (500 MHz,  $\text{CDCl}_3$ )  $\delta$  7.72 – 7.68 (m, 1H), 7.63 (dd,  $J = 2.0, 1.1$  Hz, 1H), 7.32 (dd,  $J = 8.4, 1.2$  Hz, 1H), 3.67 (d,  $J = 1.3$  Hz, 3H), 2.97 – 2.91 (m, 2H), 2.55 (s, 3H), 2.36 – 2.29 (m, 1H), 2.21 (dt,  $J = 12.5, 1.8$  Hz, 1H), 1.90 – 1.70 (m, 4H), 1.70 – 1.62 (m, 1H), 1.53 – 1.42 (m, 2H), 1.28 (d,  $J = 1.3$  Hz, 3H), 1.21 (d,  $J = 1.8$  Hz, 3H).

$^{13}\text{C NMR}$  (125 MHz,  $\text{CDCl}_3$ )  $\delta$  198.1, 178.9, 155.0, 135.5, 134.6, 129.4, 125.9, 124.7, 52.1, 47.7, 44.6, 37.8, 37.8, 36.7, 30.0, 26.6, 24.9, 21.6, 18.6, 16.7.

**IR** (neat)  $\nu_{\text{max}}$  2932, 2872, 1780, 1674, 1602, 1451, 1232, 1206, 1155, 865  $\text{cm}^{-1}$ .

**HRMS** (ESI)  $m/z$ :  $[\text{M} + \text{H}]^+$  calcd. for  $[\text{C}_{20}\text{H}_{26}\text{O}_3 + \text{H}]^+$  315.1955, found 315.1945.

$[\alpha]_{589}^{20} = +112.2$  ( $c = 0.1$ ,  $\text{CHCl}_3$ ).

### Synthesis of *o*-hydroxy Acetophenone (+)-21:

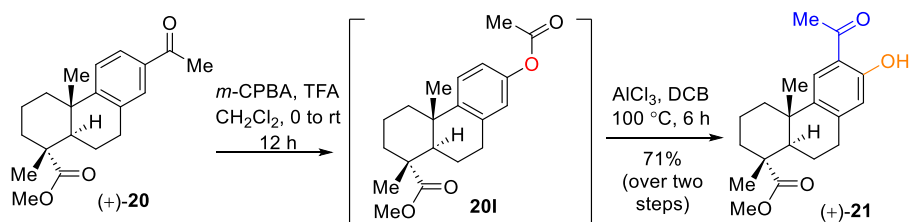

In an oven-dried round-bottom flask compound (+)-20 (6.2 g, 19.7 mmol, 1.0 equiv.) was taken in 65 mL of DCM and *m*-CPBA (10.3 g, 59.1 mmol, 3 equiv.) was added at 0 °C. Then to the reaction mixture TFA (1.9 mL, 23.64 mmol, 1.2 equiv.) was added in a drop-wise manner at 0

°C. Then reaction mixture was run for 12 h at rt After completion of reaction monitored by TLC it was quenched with saturated aqueous NaHCO<sub>3</sub> solution. The reaction mixture was then partitioned between water and DCM. The organic layer was dried over Na<sub>2</sub>SO<sub>4</sub> and concentrated under reduced pressure. The crude product **20I** was charged for next step.

In an oven-dried round-bottom flask compound **20I** was taken in 55 mL of 1,2-dichloro benzene and anhydrous AlCl<sub>3</sub> (6.6 g, 49.25 mmol, 2.5 equiv.) was added at 25 °C. Then reaction mixture was run at 100 °C for 4 h. After completion of reaction monitored by TLC, the reaction mixture was then partitioned between water and ethyl acetate. Finally, the crude products were purified by flash chromatography with 10% EtOAc in *n*-hexane to afford product (+)-**21** as yellow liquid (4.62 g, 71%).

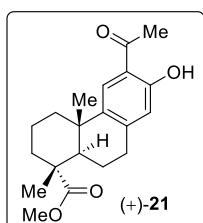

(1*R*,4*aS*,10*aR*)-methyl 6-acetyl-7-hydroxy-1,4*a*-dimethyl-1,2,3,4,4*a*,9,10,10*a*-octahydrophenanthrene-1-carboxylate [(+)-**21**]: (+)-**21** was obtained as yellow liquid (19.7 mmol scale of reaction; 71% yield). *R<sub>f</sub>* = 0.5 (10% EtOAc in *n*-hexane).

<sup>1</sup>H NMR (500 MHz, CDCl<sub>3</sub>) δ 11.94 (s, 1H), 7.57 (s, 1H), 6.64 (s, 1H), 3.68 (s, 3H), 2.89 (dt, *J* = 8.6, 4.6 Hz, 2H), 2.60 (s, 3H), 2.33 – 2.29 (m, 1H), 2.17 (dd, *J* = 12.6, 2.4 Hz, 1H), 1.82 (d, *J* = 8.7 Hz, 1H), 1.79 (s, 1H), 1.75 (d, *J* = 11.3 Hz, 2H), 1.68 (d, *J* = 6.9 Hz, 1H), 1.51 (d, *J* = 12.1 Hz, 1H), 1.46 – 1.42 (m, 1H), 1.28 (s, 3H), 1.20 (s, 3H).

<sup>13</sup>C NMR (125 MHz, CDCl<sub>3</sub>) δ 204.1, 179.0, 159.7, 146.0, 141.2, 126.4, 118.3, 117.6, 52.2, 47.6, 44.8, 38.4, 36.8, 36.8, 30.3, 26.6, 25.5, 21.3, 18.60, 16.6.

IR (neat) ν<sub>max</sub> 3320, 2958, 2848, 2396, 1745, 1489, 1234, 1105, 956, 790, 737 cm<sup>-1</sup>.

HRMS (ESI) *m/z*: [M + H]<sup>+</sup> calcd. for [C<sub>20</sub>H<sub>26</sub>O<sub>4</sub> + H]<sup>+</sup> 331.1909, found 331.1905.

[α]<sub>D</sub><sup>25</sup> = +35.6 (c = 0.2, CHCl<sub>3</sub>).

### Synthesis of Biaryl derivative (+)-22:

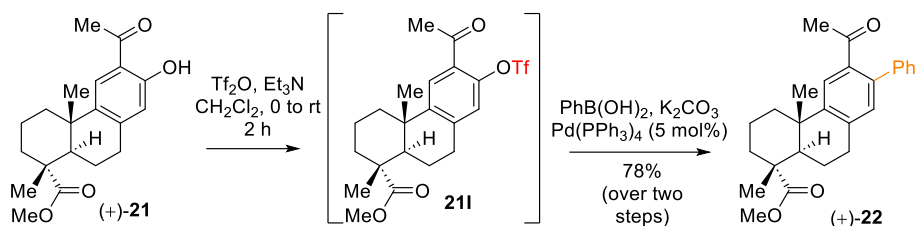

To a stirred solution of *ortho*-hydroxy acetophenone (+)-**21** (4.5 g, 13.62 mmol, 1.0 equiv.) in  $\text{CH}_2\text{Cl}_2$  (36 mL) at 0 °C was added triethyl amine (2.8 mL, 20.43 mmol, 1.5 equiv.) and trifluoromethanesulfonic anhydride (2.8 mL, 15 mmol, 1.1 equiv.) consecutively dropwise over 5 min. Then the reaction was allowed to run at room temperature. After 6 h the reaction was quenched with water, extracted into  $\text{CH}_2\text{Cl}_2$  (15 mL X 3) and the organic phase washed with 1 M hydrochloric acid (10 mL), water (5 mL) and brine (5 mL). The organic phase was dried over anhydrous sodium sulfate, filtered and the solvent removed *in vacuo*. The crude product **21I** was charged for next step.

A sealed tube or a round-bottom flask equipped with reflux condenser with  $\text{N}_2$  atmosphere was charged with  $\text{K}_2\text{CO}_3$  (3.8 g, 27.24 mmol, 2.0 equiv.), Phenylboronic acid (2 g, 16.34 mmol, 1.2 equiv), compound **21I** and  $\text{Pd(PPh}_3)_4$  (157 mg, 0.14 mmol, 0.01 equiv.), using a mixture of Benzene (12 mL), EtOH (6 mL) in  $\text{H}_2\text{O}$  (6 mL). The reaction mixture was heated at 100 °C (oil bath) with stirring for 8 h. The resulting mixture was diluted with  $\text{H}_2\text{O}$  (15 mL) and extracted with EtOAc (3 × 20 mL). The organic layer was dried ( $\text{Na}_2\text{SO}_4$ ) and then filtered. The solvent was removed in *vacuo*, and the crude product was purified by silica gel chromatography with 20% EtOAc in *n*-hexane to afford the product (+)-**22** as yellow foam (4.15 g, 78%).

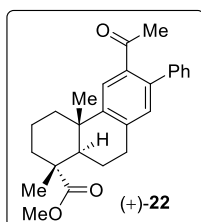



(1*R*,4*aS*,10*aR*)-methyl 6-acetyl-1,4*a*-dimethyl-7-phenyl-1,2,3,4,4*a*,9,10,10*a*-octahydrophenanthrene-1-carboxylate [(+)-**22**]: (+)-**22** was obtained as yellow foam (13.62 mmol scale of reaction; 78% yield).  $R_f = 0.35$  (10% EtOAc in *n*-hexane).

$^1\text{H NMR}$  (500 MHz,  $\text{CDCl}_3$ )  $\delta$  8.09 (s, 1H), 7.99 (d,  $J = 8.1$  Hz, 1H), 7.69 (s, 1H), 7.60 – 7.57 (m, 1H), 7.42 (t,  $J = 7.9$  Hz, 2H), 6.97 (s, 1H), 3.68 (s, 3H), 2.95 (dd,  $J = 8.8, 4.7$  Hz, 2H), 2.60 (s, 3H), 2.34 (d,  $J = 13.1$  Hz, 1H), 2.19 (dd,  $J = 12.5, 2.2$  Hz, 1H), 1.86 – 1.82 (m, 1H), 1.79 – 1.74 (m, 3H), 1.70 (d,  $J = 2.9$  Hz, 1H), 1.54 – 1.47 (m, 2H), 1.29 (s, 3H), 1.22 (s, 3H).

$^{13}\text{C NMR}$  (125 MHz,  $\text{CDCl}_3$ )  $\delta$  204.8, 179.1, 149.1, 138.7, 138.6, 138.1, 131.1, 131.1, 129.0, 128.7, 127.7, 124.6, 52.1, 47.7, 44.8, 38.0, 37.4, 36.8, 30.6, 25.1, 21.5, 18.6, 16.6, 14.2.

**IR** (neat)  $\nu_{\text{max}}$  2958, 2848, 2369, 1710, 1489, 1234, 1112, 965, 786, 720  $\text{cm}^{-1}$ .

$[\alpha]^{25}_{589} = +46.5$  ( $c = 0.5$ ,  $\text{CHCl}_3$ ).

### Synthesis of Biaryl Acetanilide derivative (+)-**23**:

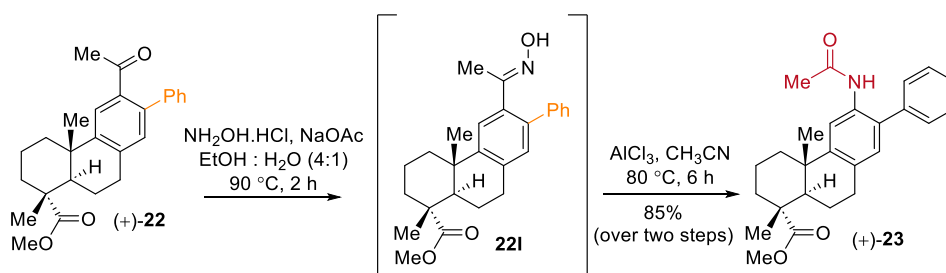

The ketone (+)-**22** (4.1 g, 10.5 mmol, 1.0 equiv.) was dissolved in EtOH (44 mL) in  $\text{H}_2\text{O}$  (11 mL). Sodium acetate (1.03 g, 12.6 mmol, 1.2 equiv.) and hydroxylamine hydrochloride (1.61 g, 23.1 mmol, 2.2 equiv.) were added before heating the mixture to reflux. After 1 h, the reaction was allowed to cool to ambient temperature and concentrated to dryness *in vacuo*. To the residue was added EtOAc (15 mL X 3) and washed with  $\text{H}_2\text{O}$  (10 mL X 2). The organic layer was dried ( $\text{Na}_2\text{SO}_4$ ), filtered and concentrated *in vacuo* to afford the crude product **22I**, which was used in the next reaction without further purification.

A mixture of oxime **22I** (1.0 equiv.) and anhydrous AlCl<sub>3</sub> (1.40 g, 10.5 mmol, 1.0 equiv.) in acetonitrile (40 mL) was stirred for 4 h at 80°C under N<sub>2</sub>. The mixture was evaporated under reduced pressure to dryness. The residue was washed with dichloromethane (25 mL X 2) and the mixture was evaporated under reduced pressure. Finally, the crude products were purified by flash chromatography with 60% EtOAc in *n*-hexane to afford product (+)-**23** as brown foam (3.62 g, 85%).

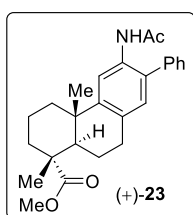

(1*R*,4*aS*,10*aR*)-methyl 6-acetamido-1,4*a*-dimethyl-7-phenyl-1,2,3,4,4*a*,9,10,10*a*-octahydrophenanthrene-1-carboxylate [(+)-**23**]: Following the general procedure (+)-**23** was obtained as brown foam (10.5 mmol scale of reaction; 85% yield).  $R_f = 0.2$  (20% EtOAc in *n*-hexane).

<sup>1</sup>H NMR (500 MHz, CDCl<sub>3</sub>) δ 8.14 (s, 1H), 7.45 (t,  $J = 7.8$  Hz, 2H), 7.40 – 7.37 (m, 1H), 7.36 – 7.34 (m, 2H), 7.07 (s, 1H), 6.92 (s, 1H), 3.67 (s, 3H), 2.91 – 2.84 (m, 2H), 2.41 – 2.36 (m, 1H), 2.26 (dd,  $J = 12.5, 2.2$  Hz, 1H), 2.00 (s, 3H), 1.89 – 1.80 (m, 2H), 1.80 – 1.75 (m, 2H), 1.66 (d,  $J = 8.0$  Hz, 1H), 1.56 (d,  $J = 4.6$  Hz, 1H), 1.45 – 1.41 (m, 1H), 1.29 (s, 3H), 1.28 (s, 3H).

<sup>13</sup>C NMR (125 MHz, CDCl<sub>3</sub>) δ 179.6, 168.6, 147.9, 138.4, 132.6, 131.5, 130.6, 130.2, 129.4, 129.1, 127.8, 118.2, 52.1, 47.8, 44.9, 38.1, 37.6, 36.8, 29.6, 25.1, 24.7, 21.8, 18.6, 16.7.

IR (neat)  $\nu_{\max}$  2968, 1745, 1690, 1564, 1215 cm<sup>-1</sup>.

HRMS (ESI)  $m/z$ : [M + H]<sup>+</sup> calcd. for [C<sub>26</sub>H<sub>31</sub>NO<sub>3</sub> + H]<sup>+</sup> 406.2382, found 406.2387.

$[\alpha]_{589}^{25} = +76.2$  (c = 0.6, CHCl<sub>3</sub>).

## Synthesis of Carbazole derivative (+)-24:

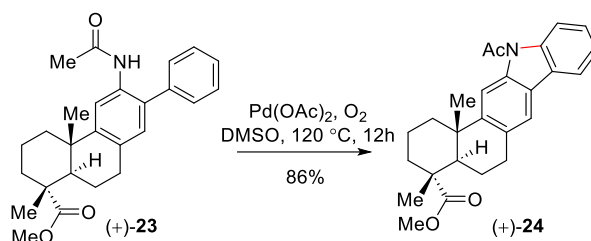

An oven-dried Schlenk tube was cooled under Ar. Biarylamide (+)-23 (3.5 g, 8.63 mmol, 1.0 equiv.), Pd(OAc)<sub>2</sub> (387.5 mg, 1.73 mmol, 0.2 equiv.) were added under air. The tube was evacuated and refilled with Ar. Under a positive Ar pressure, DMSO (25 mL) was added *via* syringe. The reaction mixture was sonicated and degassed under a weak vacuum and refilled with O<sub>2</sub> from the double manifold (this sequence was carried out three times). The sealed Schlenk tube was lowered into an oil bath at 120 °C and stirred for 10 h. After cooling to room temperature, H<sub>2</sub>O (15 mL) and EtOAc (45 mL) were added to reaction mixture. The organic phase was separated, and the aqueous phase was further extracted with EtOAc (10 mL X 2). The combined organic layers were dried over anhydrous Na<sub>2</sub>SO<sub>4</sub>, filtered through Celite, and concentrated. The residue was purified by silica gel chromatography with 15% EtOAc in *n*-hexane to afford the desired carbazole (+)-24 as white foam (3 g, 86%).

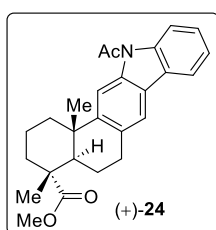

(4*R*,4*aR*,13*bS*)-methyl 12-acetyl-4,13*b*-dimethyl-2,3,4,4*a*,5,6,12,13*b*-octahydro-1*H*-naphtho[1,2-*b*]carbazole-4-carboxylate [(+)-24]: (+)-24 was obtained as white foam (8.63 mmol scale of reaction; 86% yield). *R*<sub>f</sub> = 0.5 (10% EtOAc in *n*-hexane).

<sup>1</sup>H NMR (500 MHz, CDCl<sub>3</sub>) δ 8.19 (s, 1H), 8.12 (d, *J* = 8.4 Hz, 1H), 7.91 (dd, *J* = 7.8, 1.5 Hz, 1H), 7.63 (s, 1H), 7.43 (ddd, *J* = 8.5, 7.3, 1.4 Hz, 1H), 7.34 (td, *J* = 7.5, 1.0 Hz, 1H), 3.69 (s, 3H), 3.08 (dd, *J* = 8.8, 4.4 Hz, 2H), 2.87 (s, 3H), 2.47 (d, *J* = 12.7 Hz, 1H), 2.36 (d, *J* = 7.5 Hz,

1H), 2.32 (dd,  $J = 12.5, 2.4$  Hz, 1H), 1.83 (d,  $J = 2.6$  Hz, 1H), 1.81 – 1.80 (m, 1H), 1.69 (d,  $J = 7.4$  Hz, 1H), 1.66 – 1.62 (m, 2H), 1.54 – 1.49 (m, 1H), 1.33 (s, 3H), 1.30 (s, 3H).

$^{13}\text{C}$  NMR (125 MHz,  $\text{CDCl}_3$ )  $\delta$  179.2, 170.1, 149.8, 139.2, 137.8, 131.2, 127.0, 126.6, 124.4, 123.7, 119.8, 119.8, 116.2, 112.3, 52.2, 47.9, 45.1, 38.7, 38.3, 36.8, 30.0, 27.9, 25.6, 21.9, 18.8, 16.8.

IR (neat)  $\nu_{\text{max}}$  3437, 2906, 1746, 1651, 1446, 1225, 1023, 834, 714, 546  $\text{cm}^{-1}$ .

HRMS (ESI)  $m/z$ :  $[\text{M} + \text{H}]^+$  calcd. for  $[\text{C}_{26}\text{H}_{29}\text{NO}_3 + \text{H}]^+$  404.2220, found 404.2224.

$[\alpha]_{589}^{25} = +68.6$  ( $c = 0.3$ ,  $\text{CHCl}_3$ ).

### Substrate (Regioisomeric deoxy-xiamycin derivatives) preparation for Oxidative Dimerization:

#### Deacetylation of Compound (+)-24:

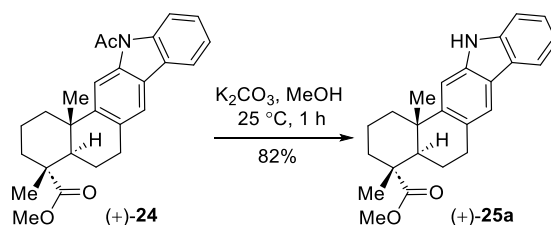

In an oven-dried round-bottom flask (+)-24 (2.9 g, 7.2 mmol, 1.0 equiv.) was dissolved in 30 mL of methanol. To the reaction mixture solid  $\text{K}_2\text{CO}_3$  (2.0 g, 14.4 mmol, 2.0 equiv.) was added at 25 °C and stirred for 1 h. After completion of the reaction (monitored by TLC) the reaction mixture was directly evaporated under reduced pressure. The mixture was then extracted with EtOAc (15 mL X 3). The combined organic layers were washed with brine and dried over  $\text{Na}_2\text{SO}_4$  and concentrated under reduced pressure. Then the crude product was purified by flash chromatography with 20% EtOAc in *n*-hexane to afford (+)-25a as white foam (2.13 g, 82% yield).

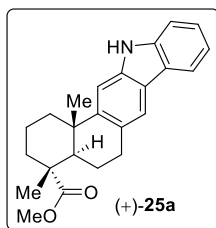

(4*R*,4*aR*,13*bS*)-methyl 4,13*b*-dimethyl-2,3,4,4*a*,5,6,12,13*b*-octahydro-1*H*-naphtho[1,2-*b*]carbazole-4-carboxylate [(+)-25a]: (+)-25a was obtained as white foam (7.2 mmol scale of reaction; 82% yield).  $R_f = 0.7$  (20% EtOAc in *n*-hexane).

$^1\text{H NMR}$  (500 MHz,  $\text{CDCl}_3$ )  $\delta$  8.00 (d,  $J = 7.8$  Hz, 1H), 7.87 (s, 1H), 7.73 (s, 1H), 7.37 – 7.34 (m, 2H), 7.29 (s, 1H), 7.19 (td,  $J = 7.0, 6.2, 1.8$  Hz, 1H), 3.70 (s, 3H), 3.15 – 3.10 (m, 2H), 2.44 – 2.39 (m, 1H), 2.36 (dd,  $J = 12.5, 2.5$  Hz, 1H), 1.95 (ddd,  $J = 14.1, 8.6, 3.3$  Hz, 1H), 1.86 – 1.81 (m, 2H), 1.80 – 1.76 (m, 1H), 1.70 (dt,  $J = 10.3, 2.5$  Hz, 1H), 1.66 (q,  $J = 6.4, 5.3$  Hz, 1H), 1.54 – 1.49 (m, 1H), 1.35 (s, 3H), 1.30 (s, 3H).

$^{13}\text{C NMR}$  (125 MHz,  $\text{CDCl}_3$ )  $\delta$  179.3, 148.5, 140.3, 138.7, 126.6, 125.5, 123.3, 120.2, 120.2, 119.2, 110.5, 105.7, 52.1, 47.9, 45.1, 38.7, 38.0, 36.8, 30.1, 25.6, 22.1, 18.9, 16.8.

**IR** (neat)  $\nu_{\text{max}}$  3425, 2918, 1742, 1447, 1264, 1045, 814, 705, 593  $\text{cm}^{-1}$ .

**HRMS** (ESI)  $m/z$ :  $[\text{M} + \text{H}]^+$  calcd. for  $[\text{C}_{24}\text{H}_{27}\text{NO}_2 + \text{H}]^+$  362.2120, found 362.2115.

$[\alpha]_{589}^{25} = +38.3$  ( $c = 0.7$ ,  $\text{CHCl}_3$ ).

#### Methylation of Carbazole derivative (+)-25a:

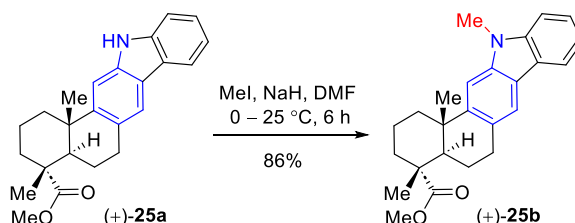

Carbazole (+)-25a (255 mg, 0.71 mmol, 1.0 equiv.) was taken in an oven dried round bottom flask dissolved in 5 mL of DMF maintaining  $\text{N}_2$  inertness and set on an ice bath. Sodium

hydride (56.8 mg, 1.42 mmol, 2.0 equiv.) was added in portion-wise manner to the reaction vessel and stirred for 15 min at 0 °C. Then iodomethane (67.2  $\mu$ L, 1.07 mmol, 1.5 equiv.) was directly added to the solution and the reaction mixture was allowed to stir at 25 °C for 4 h until the full consumption of starting material (monitored by TLC). The reaction was quenched with excess of saturated aqueous  $\text{NH}_4\text{Cl}$  solution. Then the solution was extracted with EtOAc and water. The aqueous phase was extracted with EtOAc (6 mL X 3). The combined organic layers were dried over anhydrous  $\text{Na}_2\text{SO}_4$  and concentrated in a rotary evaporator under vacuum. The crude product was purified by flash chromatography with 10% EtOAc in *n*-hexane to afford (+)-**25b** as yellow foam (227.8 mg, 86% yield).

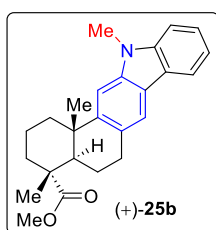

**(4*R*,4*aR*,13*bS*)-methyl 4,12,13*b*-trimethyl-2,3,4,4*a*,5,6,12,13*b*-octahydro-1*H*-naphtho[1,2-*b*]carbazole-4-carboxylate [(+)-25b]:** (+)-25b was obtained as yellow foam (0.71 mmol scale of reaction; 86% yield).  $R_f = 0.7$  (10% EtOAc in *n*-hexane).

**$^1\text{H NMR}$**  (500 MHz,  $\text{CDCl}_3$ )  $\delta$  8.07 – 8.03 (m, 1H), 7.79 (s, 1H), 7.49 – 7.44 (m, 1H), 7.36 (d,  $J = 8.2$  Hz, 1H), 7.29 (s, 1H), 7.24 – 7.20 (m, 1H), 3.82 (s, 3H), 3.73 (s, 3H), 3.21 – 3.11 (m, 2H), 2.60 – 2.47 (m, 1H), 2.41 (dd,  $J = 12.5, 2.4$  Hz, 1H), 2.24 – 2.04 (m, 1H), 2.04 – 1.94 (m, 1H), 1.89 (dd,  $J = 9.2, 2.4$  Hz, 1H), 1.87 – 1.82 (m, 1H), 1.79 – 1.70 (m, 2H), 1.59 – 1.53 (m, 1H), 1.38 (d,  $J = 7.6$  Hz, 6H).

**$^{13}\text{C NMR}$**  (125 MHz,  $\text{CDCl}_3$ )  $\delta$  179.2, 148.3, 141.7, 140.2, 12.0, 125.3, 122.6, 121.1, 120.2, 120.1, 118.5, 108.2, 103.4, 52.0, 47.9, 45.1, 38.8, 38.1, 36.8, 30.0, 29.1, 25.7, 22.1, 18.8, 16.8.

**IR** (neat)  $\nu_{\text{max}}$  3355, 2915, 1740, 1465, 1384, 1250, 1005, 853, 760, 647  $\text{cm}^{-1}$ .

**HRMS** (ESI)  $m/z$ :  $[\text{M} + \text{H}]^+$  calcd. for  $[\text{C}_{25}\text{H}_{29}\text{NO}_2 + \text{H}]^+$  376.2277, found 376.2190.

$[\alpha]_{589}^{25} = +36.6$  ( $c = 1.5$ ,  $\text{CHCl}_3$ ).

### Benylation of Carbazole derivative (+)-25a:

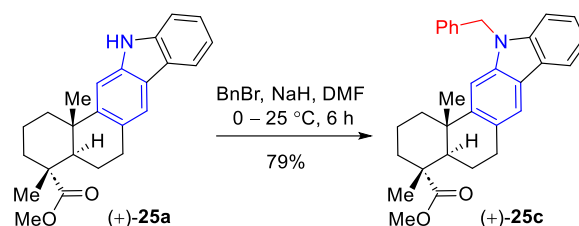

Carbazole (+)-**25a** (230 mg, 0.64 mmol, 1.0 equiv.) was taken in an oven dried round bottom flask dissolved in 5 mL of DMF maintaining N<sub>2</sub> inertness and set on an ice bath. Sodium hydride (51.2 mg, 1.28 mmol, 2.0 equiv.) was added in portion-wise manner to the reaction vessel and stirred for 15 min at 0 °C. Then benzyl bromide (114 μL, 0.96 mmol, 1.5 equiv.) was directly added to the solution and the reaction mixture was allowed to stir at 25 °C for 4 h until the full consumption of starting material (monitored by TLC). The reaction was quenched with excess of saturated aqueous NH<sub>4</sub>Cl solution. Then the solution was extracted with EtOAc and water. The aqueous phase was extracted with EtOAc (6 mL X 3). The combined organic layers were dried over anhydrous Na<sub>2</sub>SO<sub>4</sub> and concentrated in a rotary evaporator under vacuum. The crude product was purified by flash chromatography with 10% EtOAc in *n*-hexane to afford (+)-**25c** as colourless liquid (228.3 mg, 79% yield).

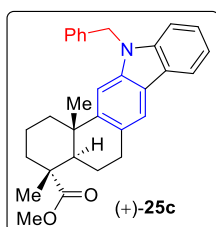

(4*R*,4*aR*,13*bS*)-methyl 12-benzyl-4,13*b*-dimethyl-2,3,4,4*a*,5,6,12,13*b*-octahydro-1*H*-naphtho[1,2-*b*]carbazole-4-carboxylate [(+)-**25c**]: (+)-**25c** was obtained as colourless liquid (0.64 mmol scale of reaction; 79% yield). *R*<sub>f</sub> = 0.6 (10% EtOAc in *n*-hexane).

<sup>1</sup>H NMR (500 MHz, CDCl<sub>3</sub>) δ 8.11 (d, *J* = 7.7 Hz, 1H), 7.85 (d, *J* = 2.5 Hz, 1H), 7.43 (t, *J* = 7.7 Hz, 1H), 7.33 (d, *J* = 10.3 Hz, 2H), 7.31 (d, *J* = 4.6 Hz, 2H), 7.28 (d, *J* = 1.5 Hz, 1H), 7.26 (d, *J* = 7.7 Hz, 1H), 7.21 (d, *J* = 7.3 Hz, 2H), 5.52 (s, 2H), 3.75 (s, 3H), 3.19 (ddd, *J* = 27.2, 8.3, 4.8 Hz, 2H), 2.52 – 2.38 (m, 2H), 2.05 – 1.96 (m, 1H), 1.92 – 1.83 (m, 2H), 1.80 (dt, *J* =

6.2, 3.0 Hz, 1H), 1.76 – 1.72 (m, 1H), 1.67 (dt,  $J = 12.0, 5.8$  Hz, 1H), 1.60 – 1.54 (m, 1H), 1.39 (d,  $J = 2.0$  Hz, 3H), 1.34 (d,  $J = 1.9$  Hz, 3H).

$^{13}\text{C}$  NMR (125 MHz,  $\text{CDCl}_3$ )  $\delta$  179.2, 148.5, 141.3, 139.9, 137.5, 128.8, 127.4, 126.6, 126.6, 126.4, 125.5, 122.9, 121.4, 120.3, 118.9, 108.8, 103.9, 52.0, 47.9, 46.6, 45.0, 38.6, 38.1, 36.8, 30.1, 25.6, 22.1, 18.8, 16.8.

IR (neat)  $\nu_{\text{max}}$  3529, 2953, 1760, 1615, 1484, 1356, 1249, 1015, 932, 894, 762, 650  $\text{cm}^{-1}$ .

HRMS (ESI)  $m/z$ :  $[\text{M} + \text{H}]^+$  calcd. for  $[\text{C}_{31}\text{H}_{33}\text{NO}_2 + \text{H}]^+$  452.2589, found 452.2592.

$[\alpha]_{\text{D}}^{25} = +35.6$  ( $c = 1.8, \text{CHCl}_3$ ).

#### Procedure for the Synthesis of Alcohol (+)-25d:

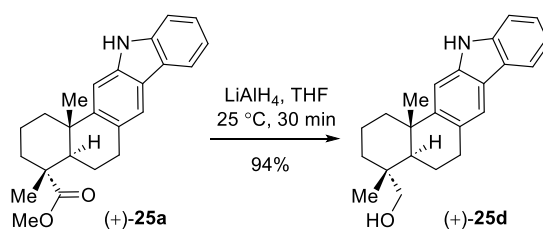

To a stirred solution (+)-25a (222 mg, 0.61 mmol, 1 equiv.) in tetrahydrofuran (4 mL), lithium aluminum hydride (23.6 mg, 0.62 mmol, 1.01 equiv.) was added at  $0\text{ }^\circ\text{C}$ , and the reaction mixture was stirred for 30 min at  $25\text{ }^\circ\text{C}$ . Water (0.5 mL), 1M aq. NaOH (1 M, 1.0 mL), and distilled water (0.5 mL) was sequentially added at  $0\text{ }^\circ\text{C}$  and the resulting mixture was warmed to  $25\text{ }^\circ\text{C}$ . Dried over sodium sulfate and filtered over a pad of celite and washed with ethyl acetate. The combined organic layer was concentrated under reduced pressure, and the resulting crude residue was purified by flash column chromatography on silica gel with ~20-30% EtOAc in *n*-hexane to provide compound (+)-25d as yellow foam (191.2 mg, 94%).

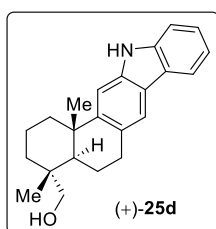



**((4*R*,4*aR*,13*bS*)-4,13*b*-dimethyl-2,3,4,4*a*,5,6,12,13*b*-octahydro-1*H*-naphtho[1,2-*b*]carbazol-4-yl)methanol [(+)-25*d*]:** (+)-25*d* was obtained as yellow foam (0.61 mmol scale of reaction; 94% yield).  $R_f = 0.4$  (20% EtOAc in *n*-hexane).

**$^1\text{H NMR}$**  (500 MHz,  $\text{CDCl}_3$ )  $\delta$  8.00 (d,  $J = 7.8$  Hz, 1H), 7.88 (d,  $J = 6.2$  Hz, 1H), 7.73 (d,  $J = 4.8$  Hz, 1H), 7.38 – 7.32 (m, 2H), 7.28 (s, 1H), 7.20 (ddd,  $J = 8.0, 6.7, 1.4$  Hz, 1H), 3.53 (dd,  $J = 14.3, 11.0$  Hz, 1H), 3.27 (d,  $J = 10.9$  Hz, 1H), 3.21 – 3.05 (m, 2H), 2.44 – 2.35 (m, 1H), 1.90 – 1.79 (m, 3H), 1.79 – 1.72 (m, 2H), 1.55 (dd,  $J = 13.1, 3.9$  Hz, 1H), 1.50 (dd,  $J = 8.8, 4.0$  Hz, 1H), 1.46 – 1.41 (m, 1H), 1.31 (s, 3H), 0.95 (s, 3H).

**$^{13}\text{C NMR}$**  (125 MHz,  $\text{CDCl}_3$ )  $\delta$  149.0, 140.2, 138.7, 126.7, 125.4, 123.3, 121.5, 120.2, 120.0, 119.1, 110.5, 105.8, 72.3, 44.0, 39.2, 38.4, 38.1, 35.2, 30.1, 25.7, 19.3, 18.9, 17.6.

**IR** (neat)  $\nu_{\text{max}}$  3662, 3353, 1754, 1456, 1261, 1076, 841, 702, 642  $\text{cm}^{-1}$ .

**HRMS** (ESI)  $m/z$ :  $[\text{M} + \text{H}]^+$  calcd. for  $[\text{C}_{23}\text{H}_{27}\text{NO} + \text{H}]^+$  334.2171, found 334.2172.

$[\alpha]_{589}^{25} = +21.9$  ( $c = 0.9$ ,  $\text{CHCl}_3$ ).

## Dimerizing optimization:

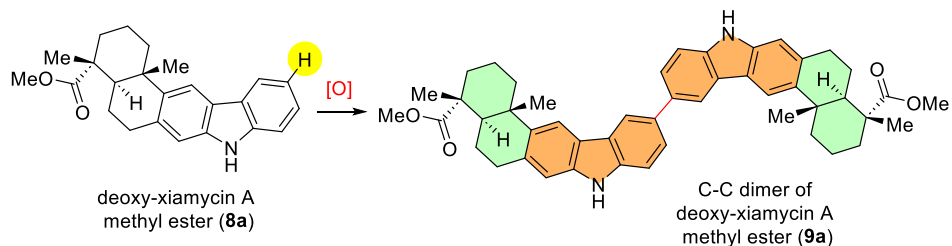

| entry    | oxidant                                   | additive                              | solvent                             | temp          | time       | yield <b>9a</b> (%) |
|----------|-------------------------------------------|---------------------------------------|-------------------------------------|---------------|------------|---------------------|
| 1        | PhI(OCOCF <sub>3</sub> ) <sub>2</sub>     | —                                     | CH <sub>2</sub> Cl <sub>2</sub>     | 25 °C         | 12 h       | NR                  |
| 2        | FeCl <sub>3</sub>                         | —                                     | CHCl <sub>3</sub>                   | 25 °C         | 6 h        | < 8%                |
| 3        | DDQ                                       | MsOH                                  | CHCl <sub>3</sub>                   | 25 °C         | 6 h        | < 15%               |
| 4        | CAN                                       | —                                     | H <sub>2</sub> O                    | 25 °C         | 12 h       | NR                  |
| 5        | AgSbF <sub>6</sub>                        | TTBP                                  | (CH <sub>2</sub> Cl) <sub>2</sub>   | 25 °C         | 2 h        | ---                 |
| 6        | PhI(OCOCF <sub>3</sub> ) <sub>2</sub>     | Et <sub>3</sub> N                     | (CH <sub>2</sub> Cl) <sub>2</sub>   | 0 °C          | 6 h        | NR                  |
| 7        | PhI(OCOCF <sub>3</sub> ) <sub>2</sub>     | BF <sub>3</sub> .OEt <sub>2</sub>     | CH <sub>2</sub> Cl <sub>2</sub>     | 0 °C          | 2 h        | 27                  |
| 8        | PhI(OCOCF <sub>3</sub> ) <sub>2</sub>     | BF <sub>3</sub> .OEt <sub>2</sub>     | CH <sub>2</sub> Cl <sub>2</sub>     | -40 °C        | 2 h        | 43                  |
| <b>9</b> | <b>PhI(OCOCF<sub>3</sub>)<sub>2</sub></b> | <b>BF<sub>3</sub>.OEt<sub>2</sub></b> | <b>CH<sub>2</sub>Cl<sub>2</sub></b> | <b>-78 °C</b> | <b>2 h</b> | <b>77</b>           |
| 10       | PhI(OCOCF <sub>3</sub> ) <sub>2</sub>     | BF <sub>3</sub> .OEt <sub>2</sub>     | HFIP                                | -78 °C        | 2 h        | 64                  |
| 11       | PhI(OCOCF <sub>3</sub> ) <sub>2</sub>     | BBr <sub>3</sub>                      | CH <sub>2</sub> Cl <sub>2</sub>     | -78 °C        | 2 h        | 36                  |
| 12       | PhI(OCOCF <sub>3</sub> ) <sub>2</sub>     | TMSI                                  | CH <sub>2</sub> Cl <sub>2</sub>     | -78 °C        | 2 h        | 55                  |
| 13       | PhI(OCOCF <sub>3</sub> ) <sub>2</sub>     | BF <sub>3</sub> .OEt <sub>2</sub>     | CH <sub>2</sub> Cl <sub>2</sub>     | -78 °C        | 2 h        | 31°                 |
| 14       | PhI(OCOCH <sub>3</sub> ) <sub>2</sub>     | BF <sub>3</sub> .OEt <sub>2</sub>     | CH <sub>2</sub> Cl <sub>2</sub>     | -78 °C        | 2 h        | 62                  |
| 15       | PhIO                                      | BF <sub>3</sub> .OEt <sub>2</sub>     | CH <sub>2</sub> Cl <sub>2</sub>     | -78 °C        | 2 h        | < 5%                |

**Table 1.** Optimization of reaction conditions for oxidative dimerization of indolosesquiterpenoids. [a] Yield of the isolated product. [b] All reactions were performed on 0.15 mmol scale, oxidant was 1.0 equiv., additive was 1.0 equiv. [c] The catalytic amount of PIFA was 50 mol %. MsOH: methanesulfonic acid; TTBP: 2,4,6-tri-*tert*-butyl-4-methylpyrimidine; CAN: ceric ammonium nitrate; TMSI: iodotrimethylsilane.

## General procedure for the Hypervalent Iodine (PIFA)-mediated oxidative dimerization reaction

To a stirred solution of monomeric indolosesquiterpenoids (0.55 mmol, 1.0 equiv.) in CH<sub>2</sub>Cl<sub>2</sub> (15 mL), PIFA (0.55 mmol, 1.0 equiv.) and BF<sub>3</sub>.OEt<sub>2</sub> (0.55 mmol, 1.0 equiv.) were quickly added at -78 °C. The reaction mixture was then stirred for 2 hours, while the reaction temperature was maintained at -78 °C. After the reaction completion, saturated aqueous NaHCO<sub>3</sub> (ca. 20 mL) was added to the mixture, and then stirred for an additional 10 minutes at ambient temperature. The organic layer was separated and the aqueous phase was extracted with CH<sub>2</sub>Cl<sub>2</sub>. The combined extract was dried with Na<sub>2</sub>SO<sub>4</sub> and evaporated to dryness. The residue was purified by column chromatography (SiO<sub>2</sub> (neutral)/*n*-hexane-AcOEt) to give C-C dimeric indolosesquiterpenoids.

### Substrate Scope of Indolosesquiterpenoids:

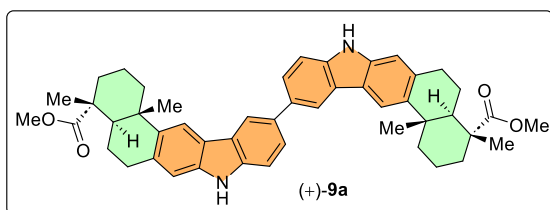

(4*R*,4*aR*,4'*R*,4'*aR*,13*bS*,13'*bS*)-**dimethyl 4,4',13*b*,13'*b*-tetramethyl-2,2',3,3',4,4*a*,4',4'*a*,5,5',6,6',8,8',13*b*,13'*b*-hexadecahydro-1*H*,1'*H*-[11,11'-binaphtho[2,1-*b*]carbazole]-4,4'-dicarboxylate [(+)-9a]**: Following the general procedure (+)-9a was obtained as yellow amorphous (0.55 mmol scale of reaction; 77% yield). *R*<sub>f</sub> = 0.25 (20% EtOAc in *n*-hexane).

<sup>1</sup>H NMR (500 MHz, DMSO) δ 10.88 (s, 1H), 8.48 (s, 1H), 8.14 (s, 1H), 7.73 (d, *J* = 8.5 Hz, 1H), 7.46 (dd, *J* = 8.4, 2.3 Hz, 1H), 7.08 (s, 1H), 3.61 (s, 3H), 3.06 (dd, *J* = 17.3, 7.0 Hz, 1H), 3.02 – 2.94 (m, 1H), 2.63 (d, *J* = 12.4 Hz, 1H), 2.15 (d, *J* = 12.3 Hz, 1H), 1.86 (t, *J* = 10.0 Hz, 1H), 1.76 – 1.69 (m, 3H), 1.61 (d, *J* = 11.8 Hz, 1H), 1.51 (t, *J* = 12.7 Hz, 1H), 1.37 (t, *J* = 10.2 Hz, 1H), 1.24 (s, 6H).

$^{13}\text{C}$  NMR (125 MHz, DMSO)  $\delta$  178.2, 140.8, 139.2, 138.8, 132.7, 131.9, 124.2, 123.6, 121.4, 117.7, 115.6, 110.8, 109.9, 51.8, 47.0, 45.2, 38.6, 37.0, 36.4, 30.1, 25.4, 21.3, 18.2, 16.4.

IR (neat)  $\nu_{\text{max}}$  3400, 2950, 1720, 1456, 1243, 1010, 823, 750, 582  $\text{cm}^{-1}$ .

HRMS (ESI)  $m/z$ :  $[\text{M} + \text{H}]^+$  calcd. for  $[\text{C}_{48}\text{H}_{52}\text{N}_2\text{O}_4 + \text{H}]^+$  721.4005, found 721.3997.

$[\alpha]_{589}^{25} = +150.8$  ( $c = 1.1$ ,  $\text{CHCl}_3$ ).

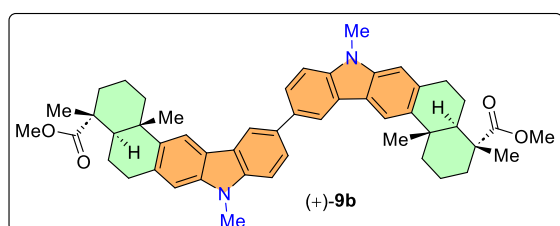

(4*R*,4*aR*,4'*R*,4'*aR*,13*bS*,13'*bS*)-dimethyl 4,4',8,8',13*b*,13'*b*-hexamethyl-2,2',3,3',4,4*a*,4',4'*a*,5,5',6,6',8,8',13*b*,13'*b*-hexadecahydro-1*H*,1'*H*-[11,11'-binaphtho[2,1-*b*]carbazole]-4,4'-dicarboxylate [(+)-9b]: Following the general procedure (+)-9b was obtained as yellow amorphous (0.55 mmol scale of reaction; 85% yield).  $R_f = 0.3$  (10% EtOAc in *n*-hexane).

$^1\text{H}$  NMR (500 MHz, DMSO)  $\delta$  8.57 (s, 1H), 8.21 (s, 1H), 7.86 – 7.83 (m, 1H), 7.57 (d,  $J = 8.5$  Hz, 1H), 7.18 (s, 1H), 3.82 (s, 3H), 3.64 (s, 3H), 3.13 (dd,  $J = 17.2, 6.8$  Hz, 1H), 3.05 (q,  $J = 8.6, 8.1$  Hz, 1H), 2.66 (d,  $J = 12.8$  Hz, 1H), 2.18 (dd,  $J = 12.5, 2.5$  Hz, 1H), 1.89 (dd,  $J = 11.8, 7.5$  Hz, 1H), 1.83 (d,  $J = 14.6$  Hz, 1H), 1.73 (d,  $J = 13.0$  Hz, 2H), 1.63 (d,  $J = 10.6$  Hz, 1H), 1.52 (t,  $J = 13.4$  Hz, 1H), 1.41 (t,  $J = 9.9$  Hz, 1H), 1.27 (d,  $J = 4.8$  Hz, 6H).

$^{13}\text{C}$  NMR (125 MHz, DMSO)  $\delta$  178.1, 141.0, 140.1, 139.7, 133.0, 131.8, 124.2, 123.1, 120.9, 117.7, 115.8, 109.0, 108.1, 79.1, 51.8, 47.0, 45.2, 37.0, 36.3, 30.3, 28.9, 25.4, 21.3, 18.2, 16.4.

IR (neat)  $\nu_{\text{max}}$  3415, 2962, 1752, 1457, 1353, 1258, 1035, 835, 756, 694  $\text{cm}^{-1}$ .

HRMS (ESI)  $m/z$ :  $[\text{M}]^+$  calcd. for  $[\text{C}_{50}\text{H}_{56}\text{N}_2\text{O}_4]^+$  748.4240, found 748.4215.

$[\alpha]_{589}^{25} = +102.5$  ( $c = 0.6$ ,  $\text{CHCl}_3$ ).

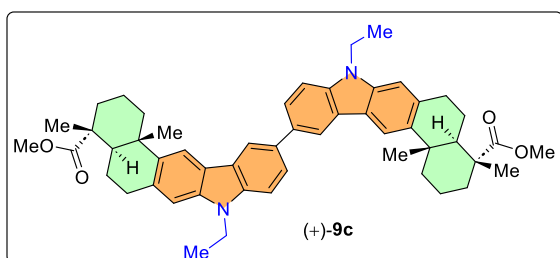

(4*R*,4*aR*,4'*R*,4'*aR*,13*bS*,13'*bS*)-**dimethyl 8,8'-diethyl-4,4',13*b*,13'*b*-tetramethyl-2,2',3,3',4,4*a*,4',4'*a*,5,5',6,6',8,8',13*b*,13'*b*-hexadecahydro-1*H*,1'*H*-[11,11'-binaphtho[2,1-*b*]carbazole]-4,4'-dicarboxylate [(+)-9c**: Following the general procedure (+)-9c was obtained as colourless liquid (0.55 mmol scale of reaction; 82% yield).  $R_f = 0.65$  (20% EtOAc in *n*-hexane).

**$^1\text{H NMR}$**  (500 MHz,  $\text{CDCl}_3$ )  $\delta$  8.49 – 8.29 (m, 1H), 8.09 (d,  $J = 3.7$  Hz, 1H), 7.79 (s, 1H), 7.46 (d,  $J = 8.7$  Hz, 1H), 7.08 (s, 1H), 4.35 (s, 2H), 3.70 (s, 3H), 3.23 – 3.13 (m, 2H), 2.63 (d,  $J = 11.9$  Hz, 1H), 2.47 (dd,  $J = 12.9, 2.3$  Hz, 1H), 2.39 (dd,  $J = 12.5, 2.4$  Hz, 1H), 2.02 – 1.93 (m, 1H), 1.85 (dd,  $J = 10.8, 7.4$  Hz, 2H), 1.71 (d,  $J = 9.2$  Hz, 2H), 1.55 – 1.50 (m, 1H), 1.48 – 1.45 (m, 3H), 1.36 (d,  $J = 2.0$  Hz, 3H), 1.35 (d,  $J = 2.3$  Hz, 3H).

**$^{13}\text{C NMR}$**  (125 MHz,  $\text{CDCl}_3$ )  $\delta$  179.4, 131.3, 125.1, 124.4, 123.9, 122.2, 121.8, 120.9, 119.0, 118.7, 115.9, 115.9, 108.5, 52.1, 47.9, 45.4, 39.1, 37.6, 37.6, 36.9, 31.1, 25.9, 22.1, 18.9, 16.8, 16.6.

**IR** (neat)  $\nu_{\text{max}}$  3320, 2840, 1762, 1650, 1465, 1345, 1247, 1032, 867, 750, 669  $\text{cm}^{-1}$ .

**HRMS** (ESI)  $m/z$ :  $[M]^+$  calcd. for  $[\text{C}_{52}\text{H}_{60}\text{N}_2\text{O}_4]^+$  776.4553, found 776.4553.

$[\alpha]_{589}^{25} = +63.9$  ( $c = 0.4$ ,  $\text{CHCl}_3$ ).

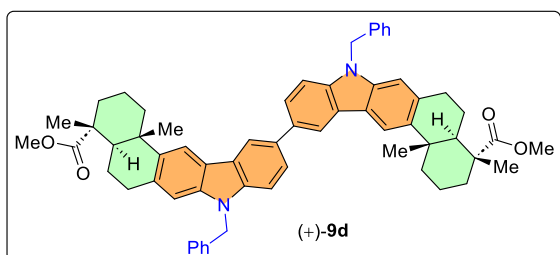

(4*R*,4*aR*,4'*R*,4'*aR*,13*bS*,13'*bS*)-dimethyl 8,8'-dibenzyl-4,4',13*b*,13'*b*-tetramethyl-2,2',3,3',4,4*a*,4',4'*a*,5,5',6,6',8,8',13*b*,13'*b*-hexadecahydro-1*H*,1'*H*-[11,11'-binaphtho[2,1-*b*]carbazole]-4,4'-dicarboxylate [(+)-**9d**]: Following the general procedure (+)-**9d** was obtained as yellow foam (0.55 mmol scale of reaction; 76% yield).  $R_f = 0.25$  (10% EtOAc in *n*-hexane).

$^1\text{H NMR}$  (500 MHz,  $\text{CDCl}_3$ )  $\delta$  8.38 (s, 1H), 8.10 (s, 1H), 7.72 (dd,  $J = 8.5, 1.9$  Hz, 1H), 7.38 – 7.32 (m, 2H), 7.29 (d,  $J = 7.5$  Hz, 2H), 7.22 – 7.20 (m, 2H), 7.02 (s, 1H), 5.47 (s, 2H), 3.68 (s, 3H), 3.14 – 3.07 (m, 2H), 2.62 (d,  $J = 12.5$  Hz, 1H), 2.36 (dd,  $J = 12.6, 2.4$  Hz, 1H), 1.97 – 1.90 (m, 1H), 1.87 – 1.80 (m, 3H), 1.70 (d,  $J = 11.1$  Hz, 2H), 1.51 – 1.46 (m, 1H), 1.35 (s, 3H), 1.34 (s, 3H).

$^{13}\text{C NMR}$  (125 MHz,  $\text{CDCl}_3$ )  $\delta$  179.3, 141.9, 140.4, 140.0, 137.7, 134.0, 128.9, 128.2, 127.5, 126.7, 125.3, 124.1, 121.9, 118.7, 115.8, 109.0, 108.4, 52.0, 47.9, 46.8, 45.4, 39.1, 37.7, 36.9, 31.0, 25.9, 22.0, 18.9, 16.8.

**IR** (neat)  $\nu_{\text{max}}$  3450, 2924, 1751, 1620, 1476, 1359, 1258, 1025, 924, 856, 762, 685  $\text{cm}^{-1}$ .

**HRMS** (ESI)  $m/z$ :  $[\text{M} + \text{H}]^+$  calcd. for  $[\text{C}_{62}\text{H}_{64}\text{N}_2\text{O}_4 + \text{H}]^+$  901.4944, found 901.4921.

$[\alpha]_{589}^{25} = +98.8$  ( $c = 0.5$ ,  $\text{CHCl}_3$ ).

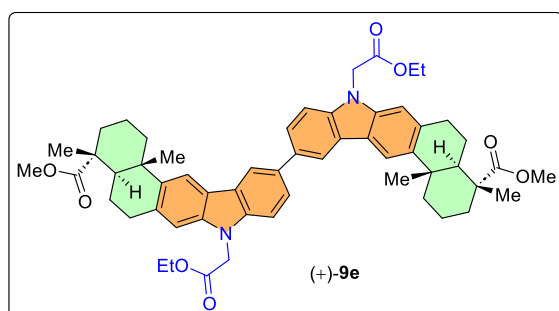

(4*R*,4*aR*,4'*R*,4'*aR*,13*bS*,13'*bS*)-dimethyl 8,8'-bis(2-ethoxy-2-oxoethyl)-4,4',13*b*,13'*b*-tetramethyl-2,2',3,3',4,4*a*,4',4'*a*,5,5',6,6',8,8',13*b*,13'*b*-hexadecahydro-1*H*,1'*H*-[11,11'-binaphtho[2,1-*b*]carbazole]-4,4'-dicarboxylate [(+)-**9e**]: Following the general procedure (+)-**9e** was obtained as yellow liquid (0.55 mmol scale of reaction; 57% yield).  $R_f = 0.25$  (20% EtOAc in *n*-hexane).

**<sup>1</sup>H NMR** (500 MHz, CDCl<sub>3</sub>) δ 8.35 (d, *J* = 1.8 Hz, 1H), 8.07 (s, 1H), 7.76 (dd, *J* = 8.4, 1.8 Hz, 1H), 7.34 (d, *J* = 8.4 Hz, 1H), 7.00 (s, 1H), 4.95 (s, 2H), 4.24 (q, *J* = 7.1 Hz, 2H), 3.70 (s, 3H), 3.17 – 3.13 (m, 2H), 2.62 (d, *J* = 12.6 Hz, 1H), 2.36 (dd, *J* = 12.5, 2.3 Hz, 1H), 1.96 (ddd, *J* = 12.2, 9.0, 3.3 Hz, 1H), 1.85 (d, *J* = 12.1 Hz, 2H), 1.81 (s, 1H), 1.73 – 1.69 (m, 2H), 1.54 – 1.49 (m, 1H), 1.34 (d, *J* = 2.2 Hz, 6H), 1.28 (d, *J* = 7.1 Hz, 3H).

**<sup>13</sup>C NMR** (125 MHz, CDCl<sub>3</sub>) δ 179.4, 168.9, 142.2, 140.2, 139.8, 134.1, 134.0, 125.4, 124.3, 122.0, 118.8, 116.0, 108.5, 108.0, 61.8, 52.1, 47.9, 45.3, 45.0, 39.0, 37.6, 36.9, 31.0, 25.9, 22.0, 18.9, 16.8, 14.3.

**IR** (neat)  $\nu_{\max}$  3360, 2946, 1768, 1632, 1456, 1163, 1002, 943, 872, 790, 635 cm<sup>-1</sup>.

**HRMS** (ESI) *m/z*: [M + H]<sup>+</sup> calcd. for [C<sub>56</sub>H<sub>64</sub>N<sub>2</sub>O<sub>8</sub> + H]<sup>+</sup> 893.4741, found 893.4727.

[ $\alpha$ ]<sub>589</sub><sup>25</sup> = +76.1 (c = 0.2, CHCl<sub>3</sub>).

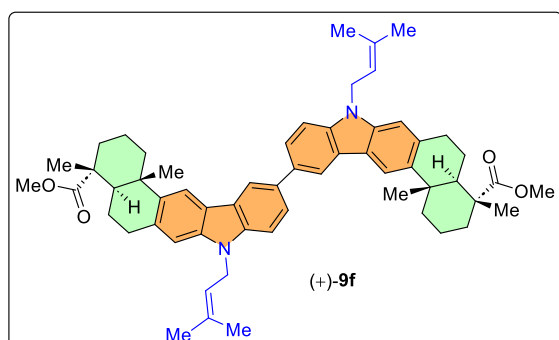

(4*R*,4*aR*,4'*R*,4'*aR*,13*bS*,13'*bS*)-**dimethyl 4,4',13*b*,13'*b*-tetramethyl-8,8'-bis(3-methylbut-2-en-1-yl)-2,2',3,3',4,4*a*,4',4'*a*,5,5',6,6',8,8',13*b*,13'*b*-hexadecahydro-1*H*,1'*H*-[11,11'-binaphtho[2,1-*b*]carbazole]-4,4'-dicarboxylate [(+)-**9f****]: Following the general procedure (+)-**9f** was obtained as yellow liquid (0.55 mmol scale of reaction; 48% yield). *R<sub>f</sub>* = 0.5 (5% EtOAc in *n*-hexane).

**<sup>1</sup>H NMR** (500 MHz, CDCl<sub>3</sub>) δ 8.36 (s, 1H), 8.08 (s, 1H), 7.77 (d, *J* = 8.5 Hz, 1H), 7.39 (d, *J* = 8.4 Hz, 1H), 7.04 (s, 1H), 5.31 (d, *J* = 6.7 Hz, 1H), 4.86 (d, *J* = 6.3 Hz, 2H), 3.69 (s, 3H), 3.16 (d, *J* = 7.8 Hz, 2H), 2.62 (d, *J* = 12.6 Hz, 1H), 2.38 (d, *J* = 12.3 Hz, 1H), 1.95 (s, 3H), 1.87 –

1.84 (m, 2H), 1.73 (s, 3H), 1.69 (d,  $J = 5.3$  Hz, 2H), 1.57 (d,  $J = 6.7$  Hz, 1H), 1.53 (d,  $J = 6.6$  Hz, 1H), 1.35 (s, 6H).

$^{13}\text{C}$  NMR (125 MHz,  $\text{CDCl}_3$ )  $\delta$  179.4, 141.4, 139.9, 139.5, 135.0, 133.6, 133.5, 125.1, 124.0, 121.9, 120.4, 118.6, 115.8, 108.8, 108.3, 52.1, 47.9, 45.4, 41.3, 39.1, 37.6, 36.9, 31.1, 25.9, 25.8, 22.1, 18.9, 18.4, 16.8.

IR (neat)  $\nu_{\text{max}}$  3325, 2946, 1765, 1632, 1442, 1247, 1046, 900, 852, 790, 656  $\text{cm}^{-1}$ .

HRMS (ESI)  $m/z$ :  $[\text{M} + \text{H}]^+$  calcd. for  $[\text{C}_{58}\text{H}_{68}\text{N}_2\text{O}_4 + \text{H}]^+$  857.5258, found 857.5268.

$[\alpha]_{589}^{25} = +101.7$  ( $c = 0.2$ ,  $\text{CHCl}_3$ ).

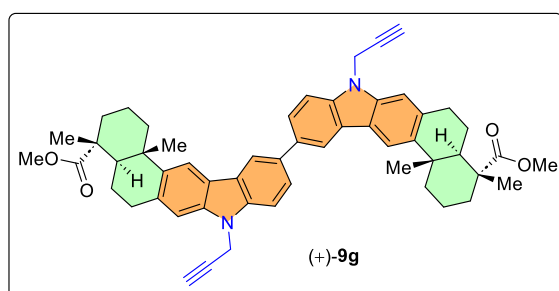

(4*R*,4*aR*,4'*R*,4'*aR*,13*bS*,13'*bS*)-dimethyl 4,4',13*b*,13'*b*-tetramethyl-8,8'-di(prop-2-yn-1-yl)-2,2',3,3',4,4*a*,4',4'*a*,5,5',6,6',8,8',13*b*,13'*b*-hexadecahydro-1*H*,1'*H*-[11,11'-binaphtho[2,1-*b*]carbazole]-4,4'-dicarboxylate [(+)-**9g**]: Following the general procedure (+)-**9g** was obtained as yellow liquid (0.55 mmol scale of reaction; 56% yield).  $R_f = 0.5$  (20% EtOAc in *n*-hexane).

$^1\text{H}$  NMR (500 MHz,  $\text{CDCl}_3$ )  $\delta$  8.36 (d,  $J = 1.8$  Hz, 1H), 8.08 (s, 1H), 7.80 (dd,  $J = 8.4, 1.8$  Hz, 1H), 7.50 (d,  $J = 8.4$  Hz, 1H), 7.15 (s, 1H), 5.00 (d,  $J = 2.5$  Hz, 2H), 3.70 (s, 3H), 3.21 – 3.17 (m, 2H), 2.62 (d,  $J = 12.3$  Hz, 1H), 2.37 (dd,  $J = 12.5, 2.4$  Hz, 1H), 2.28 (t,  $J = 2.4$  Hz, 1H), 2.00 – 1.94 (m, 1H), 1.87 – 1.83 (m, 2H), 1.83 – 1.80 (m, 1H), 1.73 – 1.69 (m, 2H), 1.53 (ddd,  $J = 12.8, 5.3, 2.8$  Hz, 1H), 1.35 (s, 6H).

$^{13}\text{C}$  NMR (125 MHz,  $\text{CDCl}_3$ )  $\delta$  179.4, 142.2, 139.5, 139.1, 134.1, 134.0, 125.4, 124.3, 122.1, 118.8, 116.0, 108.9, 108.3, 78.3, 72.3, 52.1, 47.9, 45.3, 39.0, 37.6, 36.9, 32.5, 31.0, 25.9, 22.0, 18.9, 16.8.



**IR** (neat)  $\nu_{\max}$  3466, 2952, 1865, 1665, 1465, 1274, 1064, 965, 867, 778, 643  $\text{cm}^{-1}$ .

**HRMS** (ESI)  $m/z$ :  $[M + H]^+$  calcd. for  $[\text{C}_{54}\text{H}_{56}\text{N}_2\text{O}_4 + H]^+$  797.4318, found 797.4338.

$[\alpha]^{25}_{589} = +109.7$  ( $c = 0.6$ ,  $\text{CHCl}_3$ ).

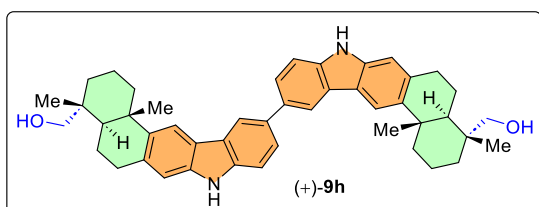

**((4*R*,4*aR*,4'*R*,4'*aR*,13*bS*,13'*bS*)-4,4',13*b*,13'*b*-tetramethyl-2,2',3,3',4,4*a*,4',4'*a*,5,5',6,6',8,8',13*b*,13'*b*-hexadecahydro-1*H*,1'*H*-[11,11'-binaphtho[2,1-*b*]carbazole]-4,4'-diyl)dimethanol [(+)-9*h*]**: Following the general procedure (+)-9*h* was obtained as white amorphous (0.55 mmol scale of reaction; 62% yield).  $R_f = 0.2$  (50% EtOAc in *n*-hexane).

**$^1\text{H NMR}$**  (500 MHz, DMSO)  $\delta$  10.84 (s, 1H), 8.47 (s, 1H), 8.13 (s, 1H), 7.74 – 7.70 (m, 1H), 7.45 (d,  $J = 8.3$  Hz, 1H), 7.07 (s, 1H), 4.50 (t,  $J = 5.6$  Hz, 2H), 3.04 – 3.02 (m, 1H), 2.98 – 2.94 (m, 1H), 2.59 (d,  $J = 12.7$  Hz, 1H), 1.82 (d,  $J = 8.4$  Hz, 2H), 1.71 (s, 1H), 1.68 (s, 2H), 1.54 (t,  $J = 12.6$  Hz, 2H), 1.39 (d,  $J = 11.9$  Hz, 1H), 1.25 (s, 3H), 0.82 (s, 3H).

**$^{13}\text{C NMR}$**  (125 MHz, DMSO)  $\delta$  141.4, 139.1, 138.6, 133.4, 131.8, 124.0, 123.7, 121.2, 117.6, 115.6, 110.8, 109.8, 70.0, 43.3, 39.9, 39.8, 37.6, 37.4, 35.0, 30.3, 25.8, 18.5, 17.6.

**IR** (neat)  $\nu_{\max}$  3590, 3317, 1720, 1476, 1243, 1056, 885, 776, 582  $\text{cm}^{-1}$ .

**HRMS** (ESI)  $m/z$ :  $[M + H]^+$  calcd. for  $[\text{C}_{46}\text{H}_{52}\text{N}_2\text{O}_2 + H]^+$  665.4107, found 665.4093.

$[\alpha]^{25}_{589} = +99.3$  ( $c = 0.3$ ,  $\text{CHCl}_3$ ).

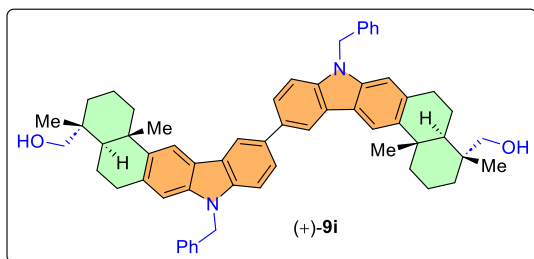

((4*R*,4*aR*,4'*R*,4'*aR*,13*bS*,13'*bS*)-8,8'-dibenzyl-4,4',13*b*,13'*b*-tetramethyl-2,2',3,3',4,4*a*,4',4'*a*,5,5',6,6',8,8',13*b*,13'*b*-hexadecahydro-1*H*,1'*H*-[11,11'-binaphtho[2,1-*b*]carbazole]-4,4'-diyl)dimethanol [(+)-**9i**]: Following the general procedure (+)-**9i** was obtained as white amorphous (0.55 mmol scale of reaction; 54% yield).  $R_f = 0.4$  (40% EtOAc in *n*-hexane).

**<sup>1</sup>H NMR** (500 MHz, CDCl<sub>3</sub>)  $\delta$  8.47 – 8.31 (m, 1H), 8.11 (d,  $J = 3.9$  Hz, 1H), 7.72 (dt,  $J = 11.1, 9.1$  Hz, 1H), 7.43 (dd,  $J = 8.6, 4.5$  Hz, 1H), 7.35 (t,  $J = 7.2$  Hz, 1H), 7.29 – 7.27 (m, 2H), 7.21 – 7.19 (m, 2H), 7.03 (d,  $J = 4.2$  Hz, 1H), 5.47 (s, 2H), 3.51 (d,  $J = 10.9$  Hz, 1H), 3.26 (d,  $J = 11.0$  Hz, 1H), 3.10 (q,  $J = 8.8, 7.4$  Hz, 2H), 2.60 (d,  $J = 11.9$  Hz, 1H), 1.88 – 1.84 (m, 2H), 1.79 – 1.74 (m, 2H), 1.62 (h,  $J = 6.3, 4.6$  Hz, 2H), 1.52 – 1.47 (m, 2H), 1.35 (d,  $J = 1.6$  Hz, 3H), 0.95 (s, 3H).

**<sup>13</sup>C NMR** (125 MHz, CDCl<sub>3</sub>)  $\delta$  142.2, 140.3, 139.9, 137.7, 134.1, 133.6, 128.9, 127.5, 127.5, 126.7, 126.6, 125.6, 125.2, 125.1, 124.5, 124.1, 122.9, 122.1, 121.8, 121.7, 121.0, 118.7, 115.9, 109.0, 108.7, 108.3, 72.4, 46.8, 44.4, 44.3, 44.1, 39.5, 39.5, 38.1, 38.1, 38.0, 38.0, 37.8, 35.4, 32.1, 31.1, 29.8, 29.8, 26.0, 22.8, 19.3, 19.0, 17.6, 17.6.

**IR** (neat)  $\nu_{\max}$  3634, 3337, 1765, 1415, 1220, 1085, 965, 720, 628 cm<sup>-1</sup>.

**HRMS** (ESI)  $m/z$ : [M]<sup>+</sup> calcd. for [C<sub>60</sub>H<sub>64</sub>N<sub>2</sub>O<sub>2</sub>]<sup>+</sup> 844.4968, found 844.4971.

$[\alpha]_{589}^{25} = +42.8$  ( $c = 0.2$ , CHCl<sub>3</sub>).

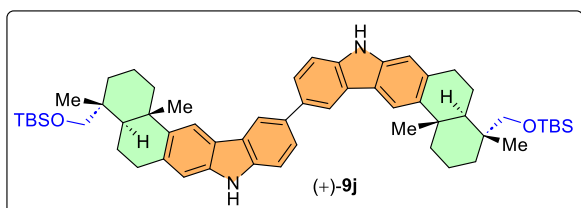

(4*R*,4*aR*,4'*R*,4'*aR*,13*bS*,13'*bS*)-4,4'-bis(((*tert*-butyldimethylsilyl)oxy)methyl)-4,4',13*b*,13'*b*-tetramethyl-2,2',3,3',4,4*a*,4',4'*a*,5,5',6,6',8,8',13*b*,13'*b*-hexadecahydro-1*H*,1'*H*-11,11'-binaphtho[2,1-*b*]carbazole [(+)-**9j**]: Following the general procedure (+)-**9j** was obtained as yellow amorphous (0.55 mmol scale of reaction; 61% yield).  $R_f = 0.5$  (20% EtOAc in *n*-hexane).

<sup>1</sup>H NMR (500 MHz, CDCl<sub>3</sub>) δ 8.34 (d, *J* = 1.9 Hz, 1H), 8.08 (s, 1H), 7.79 (s, 1H), 7.72 (dd, *J* = 8.3, 1.8 Hz, 1H), 7.43 (d, *J* = 8.3 Hz, 1H), 7.09 (s, 1H), 3.47 (d, *J* = 9.6 Hz, 1H), 3.13 (d, *J* = 9.6 Hz, 1H), 3.11 – 3.06 (m, 2H), 2.57 (d, *J* = 12.6 Hz, 1H), 1.89 (dd, *J* = 12.4, 2.3 Hz, 2H), 1.84 (dq, *J* = 9.3, 4.9, 4.2 Hz, 2H), 1.79 – 1.73 (m, 2H), 1.60 (ddd, *J* = 11.6, 7.2, 4.1 Hz, 2H), 1.34 (s, 3H), 0.89 (s, 3H), 0.88 (s, 9H), 0.04 (s, 6H).

<sup>13</sup>C NMR (125 MHz, CDCl<sub>3</sub>) δ 142.8, 139.2, 138.6, 134.4, 133.9, 125.2, 124.6, 122.3, 118.6, 116.0, 110.6, 110.1, 72.0, 44.1, 39.6, 38.3, 38.1, 35.6, 31.4, 26.4, 26.1, 19.2, 19.2, 18.5, 17.8, -5.4, -5.4.

IR (neat)  $\nu_{\max}$  2945, 1712, 1556, 1354, 1058, 965, 823, 702, 692 cm<sup>-1</sup>.

HRMS (ESI) *m/z*: [M + H]<sup>+</sup> calcd. for [C<sub>58</sub>H<sub>80</sub>N<sub>2</sub>O<sub>2</sub>Si<sub>2</sub> + H]<sup>+</sup> 893.5837, found 893.5852.

$[\alpha]_{589}^{25} = +125.5$  (c = 0.2, CHCl<sub>3</sub>).

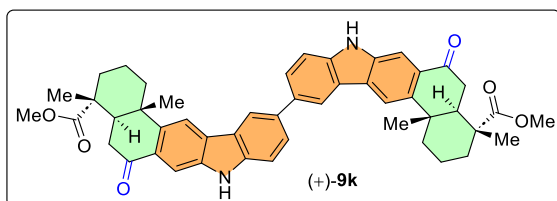

(4*R*,4*aR*,4'*R*,4'*aR*,13*bS*,13'*bS*)-dimethyl 4,4',13*b*,13'*b*-tetramethyl-6,6'-dioxo-2,2',3,3',4,4*a*,4',4'*a*,5,5',6,6',8,8',13*b*,13'*b*-hexadecahydro-1*H*,1'*H*-[11,11'-binaphtho[2,1-*b*]carbazole]-4,4'-dicarboxylate [(+)-**9k**]: Following the general procedure (+)-**9k** was obtained as yellow amorphous (0.55 mmol scale of reaction; 41% yield).  $R_f = 0.25$  (40% EtOAc in *n*-hexane).

**<sup>1</sup>H NMR** (500 MHz, DMSO)  $\delta$  11.43 (s, 1H), 8.72 (s, 1H), 8.40 (s, 1H), 8.02 (s, 1H), 7.94 (d,  $J = 8.2$  Hz, 1H), 7.62 (d,  $J = 8.5$  Hz, 1H), 3.63 (s, 3H), 2.89 (dd,  $J = 17.6, 14.2$  Hz, 1H), 2.73 (d,  $J = 12.5$  Hz, 1H), 2.64 (dd,  $J = 14.1, 3.2$  Hz, 1H), 2.24 – 2.18 (m, 1H), 1.87 (t,  $J = 13.5$  Hz, 1H), 1.79 (d,  $J = 14.0$  Hz, 2H), 1.70 (d,  $J = 12.8$  Hz, 2H), 1.33 (d,  $J = 4.4$  Hz, 6H).

**<sup>13</sup>C NMR** (125 MHz, DMSO)  $\delta$  197.4, 177.4, 146.2, 141.0, 138.2, 132.2, 128.2, 127.7, 126.6, 122.7, 119.2, 115.4, 111.6, 109.1, 52.1, 46.2, 44.2, 37.7, 37.7, 37.4, 36.3, 24.2, 17.8, 16.2.

**IR** (neat)  $\nu_{\max}$  3552, 2944, 1640, 1460, 1476, 1172, 832, 776, 675  $\text{cm}^{-1}$ .

**HRMS** (ESI)  $m/z$ :  $[\text{M} + \text{H}]^+$  calcd. for  $[\text{C}_{48}\text{H}_{48}\text{N}_2\text{O}_6 + \text{H}]^+$  749.3591, found 749.3583.

$[\alpha]_{589}^{25} = +9.7$  ( $c = 0.5$ , MeOH).

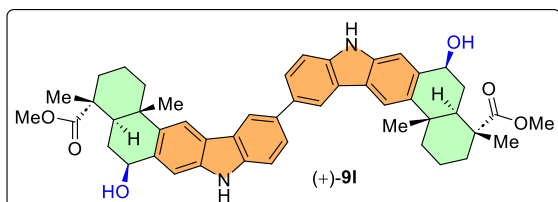

(4*R*,4*aR*,4'*R*,4'*aR*,6*S*,6'*S*,13*bS*,13'*bS*)-dimethyl 6,6'-dihydroxy-4,4',13*b*,13'*b*-tetramethyl-2,2',3,3',4,4*a*,4',4'*a*,5,5',6,6',8,8',13*b*,13'*b*-hexadecahydro-1*H*,1'*H*-[11,11'-binaphtho[2,1-*b*]carbazole]-4,4'-dicarboxylate [(+)-**9I**]: Following the general procedure (+)-**9I** was obtained as white amorphous (0.55 mmol scale of reaction; 34% yield).  $R_f = 0.5$  (70% EtOAc in *n*-hexane).

**<sup>1</sup>H NMR** (500 MHz, CD<sub>3</sub>OD)  $\delta$  8.65 (s, 1H), 7.87 – 7.86 (m, 1H), 7.84 (s, 1H), 7.56 (s, 1H), 7.51 (d,  $J = 8.3$  Hz, 1H), 4.91 (s, 1H), 3.68 (s, 3H), 2.19 (d,  $J = 12.4$  Hz, 2H), 1.90 – 1.83 (m, 1H), 1.72 – 1.65 (m, 2H), 1.55 (d,  $J = 14.3$  Hz, 1H), 1.51 – 1.46 (m, 2H), 1.41 – 1.35 (m, 1H), 1.24 (s, 3H), 1.15 (s, 3H).

**<sup>13</sup>C NMR** (125 MHz, CD<sub>3</sub>OD)  $\delta$  180.6, 142.0, 141.4, 140.7, 137.6, 134.7, 126.3, 125.2, 124.4, 119.3, 116.5, 111.9, 110.2, 72.0, 52.5, 45.2, 39.9, 39.1, 37.7, 33.7, 33.1, 30.7, 26.5, 17.0.

**IR** (neat)  $\nu_{\max}$  3614, 3198, 2855, 1743, 1695, 1565, 1430, 1376, 1169, 845  $\text{cm}^{-1}$ .

**HRMS** (ESI)  $m/z$ :  $[M]^+$  calcd. for  $[C_{48}H_{52}N_2O_6]^+$  752.3825, found 752.4019.

$[\alpha]^{25}_{589} = +64.5$  ( $c = 0.2$ , MeOH).

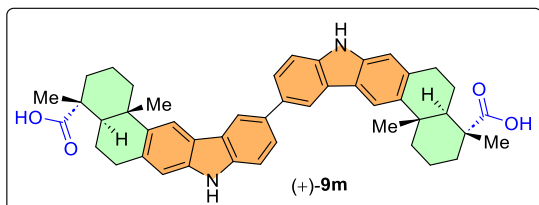

(4*R*,4*aR*,4'*R*,4'*aR*,13*bS*,13'*bS*)-4,4',13*b*,13'*b*-tetramethyl-2,2',3,3',4,4*a*,4',4'*a*,5,5',6,6',8,8',13*b*,13'*b*-hexadecahydro-1*H*,1'*H*-[11,11'-binaphtho[2,1-*b*]carbazole]-4,4'-dicarboxylic acid [(+)-9*m*]: Following the general procedure (+)-9*m* was obtained as yellow amorphous (0.55 mmol scale of reaction; 59% yield).  $R_f = 0.2$  (40% EtOAc in *n*-hexane).

**$^1H$  NMR** (500 MHz, DMSO)  $\delta$  12.15 (s, 1H), 10.89 (s, 1H), 8.50 (d,  $J = 1.9$  Hz, 1H), 8.16 (s, 1H), 7.75 (dd,  $J = 8.3, 1.9$  Hz, 1H), 7.48 (d,  $J = 8.4$  Hz, 1H), 7.11 (s, 1H), 3.10 (dd,  $J = 16.9, 6.8$  Hz, 1H), 3.01 (dt,  $J = 17.5, 9.1$  Hz, 1H), 2.68 – 2.64 (m, 1H), 2.18 (dd,  $J = 12.4, 2.4$  Hz, 1H), 1.88 (dd,  $J = 11.7, 7.3$  Hz, 1H), 1.86 – 1.80 (m, 1H), 1.76 (s, 1H), 1.74 (d,  $J = 4.3$  Hz, 1H), 1.66 – 1.62 (m, 1H), 1.55 – 1.48 (m, 2H), 1.27 (s, 3H), 1.24 (s, 3H).

**$^{13}C$  NMR** (125 MHz, DMSO)  $\delta$  179.5, 140.9, 139.1, 138.7, 132.8, 131.9, 124.1, 123.6, 121.4, 117.7, 115.6, 110.8, 109.9, 46.4, 45.0, 38.7, 37.0, 36.4, 30.2, 25.5, 21.4, 18.3, 16.5.

**IR** (neat)  $\nu_{max}$  3016, 2857, 2378, 1779, 1487, 1256, 1145, 937, 776  $cm^{-1}$ .

**HRMS** (ESI)  $m/z$ :  $[M + H]^+$  calcd. for  $[C_{46}H_{48}N_2O_4 + H]^+$  693.3693, found 693.3685.

$[\alpha]^{25}_{589} = +77.9$  ( $c = 0.2$ , MeOH).

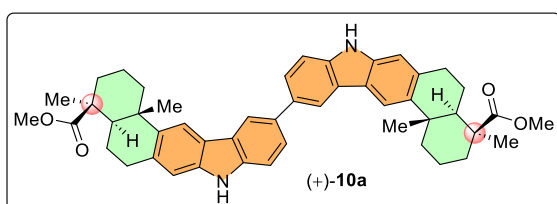

(4*S*,4*aR*,4'*S*,4'*aR*,13*bS*,13'*bS*)-dimethyl

4,4',13*b*,13'*b*-tetramethyl-

2,2',3,3',4,4*a*,4',4'*a*,5,5',6,6',8,8',13*b*,13'*b*-hexadecahydro-1*H*,1'*H*-[11,11'-binaphtho[2,1-*b*]carbazole]-4,4'-dicarboxylate [(+)-10*a*]: Following the general procedure (+)-10*a* was obtained as brown amorphous (0.55 mmol scale of reaction; 75% yield).  $R_f = 0.45$  (30% EtOAc in *n*-hexane).

<sup>1</sup>H NMR (500 MHz, CDCl<sub>3</sub>) δ 8.43 (s, 1H), 8.31 (d,  $J = 17.0$  Hz, 1H), 8.07 (d,  $J = 7.7$  Hz, 2H), 7.84 (s, 1H), 7.78 – 7.70 (m, 2H), 7.50 (d,  $J = 8.9$  Hz, 1H), 7.41 (dd,  $J = 8.7, 2.1$  Hz, 2H), 7.28 (s, 1H), 7.06 (d,  $J = 4.9$  Hz, 1H), 3.72 – 3.69 (m, 6H), 3.37 (td,  $J = 13.6, 13.1, 6.9$  Hz, 1H), 3.13 – 2.97 (m, 2H), 2.56 (dd,  $J = 10.2, 6.6$  Hz, 1H), 2.47 (dd,  $J = 14.0, 7.1$  Hz, 1H), 2.41 – 2.38 (m, 1H), 2.33 (dd,  $J = 13.5, 3.5$  Hz, 2H), 2.29 – 2.23 (m, 1H), 2.19 (dd,  $J = 13.2, 5.2$  Hz, 1H), 2.13 – 2.04 (m, 3H), 1.75 (s, 3H), 1.71 – 1.63 (m, 3H), 1.56 (td,  $J = 13.1, 3.7$  Hz, 1H), 1.50 – 1.41 (m, 2H), 1.35 (d,  $J = 4.8$  Hz, 3H), 1.33 (s, 3H), 1.18 (s, 3H), 1.18 (d,  $J = 1.7$  Hz, 3H).

<sup>13</sup>C NMR (125 MHz, CDCl<sub>3</sub>) δ 178.2, 140.5, 139.7, 139.2, 139.0, 138.7, 137.9, 134.3, 131.5, 131.5, 125.1, 124.9, 124.3, 124.1, 122.5, 122.1, 121.8, 121.3, 121.2, 118.9, 117.2, 110.7, 110.6, 110.0, 108.6, 53.5, 52.8, 51.4, 44.3, 44.2, 40.5, 38.9, 38.6, 37.9, 37.8, 33.2, 31.1, 29.8, 28.8, 28.8, 28.7, 24.1, 23.2, 21.5, 20.9, 20.3.

IR (neat)  $\nu_{\max}$  3487, 2950, 1776, 1456, 1243, 1068, 823, 735, 579 cm<sup>-1</sup>.

HRMS (ESI)  $m/z$ : [M + H]<sup>+</sup> calcd. for [C<sub>48</sub>H<sub>52</sub>N<sub>2</sub>O<sub>4</sub> + H]<sup>+</sup> 721.4005, found 721.3986.

$[\alpha]_{589}^{25} = +302.3$  (c = 0.2, CHCl<sub>3</sub>).

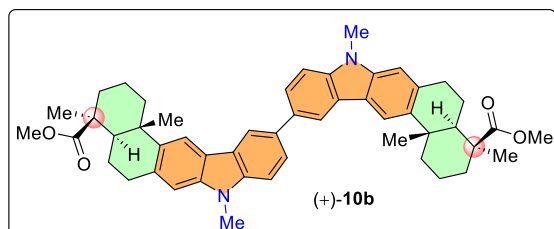

(4*S*,4*aR*,4'*S*,4'*aR*,13*bS*,13'*bS*)-dimethyl

4,4',8,8',13*b*,13'*b*-hexamethyl-

2,2',3,3',4,4*a*,4',4'*a*,5,5',6,6',8,8',13*b*,13'*b*-hexadecahydro-1*H*,1'*H*-[11,11'-binaphtho[2,1-

**b]carbazole]-4,4'-dicarboxylate [(+)-10b]**: Following the general procedure (+)-10b was obtained as yellow foam (0.55 mmol scale of reaction; 82% yield).  $R_f = 0.6$  (20% EtOAc in *n*-hexane).

$^1\text{H NMR}$  (500 MHz,  $\text{CDCl}_3$ )  $\delta$  8.12 (s, 2H), 7.81 (s, 4H), 7.49 (d,  $J = 1.8$  Hz, 2H), 7.47 (d,  $J = 1.9$  Hz, 2H), 3.71 (s, 3H), 3.71 (s, 3H), 3.70 (s, 6H), 3.19 (dd,  $J = 16.6, 5.2$  Hz, 2H), 3.10 (d,  $J = 13.2$  Hz, 2H), 2.59 (d,  $J = 13.2$  Hz, 2H), 2.48 (td,  $J = 8.5, 7.6, 4.0$  Hz, 2H), 2.41 (d,  $J = 12.8$  Hz, 2H), 2.36 – 2.32 (m, 4H), 2.12 – 2.09 (m, 3H), 1.76 – 1.74 (m, 2H), 1.70 (d,  $J = 10.4$  Hz, 3H), 1.34 (s, 3H), 1.19 (s, 3H), 1.19 (d,  $J = 1.9$  Hz, 6H).

$^{13}\text{C NMR}$  (125 MHz,  $\text{CDCl}_3$ )  $\delta$  178.2, 140.7, 140.4, 139.8, 139.1, 131.6, 124.9, 124.3, 124.3, 123.8, 123.6, 122.1, 121.9, 121.8, 120.6, 118.8, 117.3, 117.3, 108.5, 108.3, 107.9, 106.5, 53.5, 52.9, 51.4, 44.3, 44.2, 38.9, 38.6, 37.9, 37.8, 33.4, 32.1, 31.1, 31.1, 29.8, 28.8, 28.8, 28.7, 24.0, 23.2, 22.8, 21.5, 20.9, 20.3.

**IR** (neat)  $\nu_{\text{max}}$  3322, 2965, 1749, 1456, 1345, 1285, 1013, 853, 760, 688  $\text{cm}^{-1}$ .

**HRMS** (ESI)  $m/z$ :  $[\text{M}]^+$  calcd. for  $[\text{C}_{50}\text{H}_{56}\text{N}_2\text{O}_4]^+$  748.4240, found 748.4255.

$[\alpha]_{589}^{25} = +97.9$  ( $c = 0.5$ ,  $\text{CHCl}_3$ ).

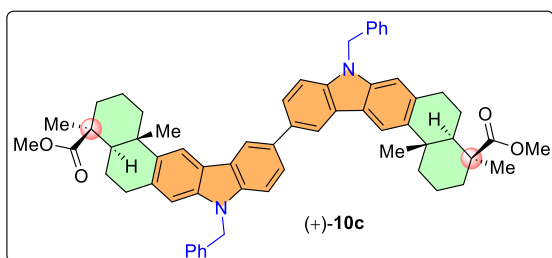

**(4*S*,4*aR*,4'*S*,4'*aR*,13*bS*,13'*bS*)-dimethyl 8,8'-dibenzyl-4,4',13*b*,13'*b*-tetramethyl-2,2',3,3',4,4*a*,4',4'*a*,5,5',6,6',8,8',13*b*,13'*b*-hexadecahydro-1*H*,1'*H*-[11,11'-binaphtho[2,1-*b*]carbazole]-4,4'-dicarboxylate [(+)-10c]**: Following the general procedure (+)-10c was obtained as yellow gel (0.55 mmol scale of reaction; 69% yield).  $R_f = 0.5$  (20% EtOAc in *n*-hexane).

**<sup>1</sup>H NMR** (500 MHz, CDCl<sub>3</sub>) δ 8.49 – 8.48 (m, 1H), 8.39 – 8.33 (m, 1H), 8.14 (d, *J* = 1.7 Hz, 1H), 7.76 (dd, *J* = 8.5, 1.7 Hz, 1H), 7.74 – 7.71 (m, 1H), 7.45 (d, *J* = 8.3 Hz, 1H), 7.42 (dd, *J* = 8.9, 3.1 Hz, 2H), 7.39 – 7.37 (m, 1H), 7.30 (d, *J* = 1.7 Hz, 1H), 7.29 – 7.28 (m, 2H), 7.27 (s, 1H), 7.25 (s, 1H), 7.23 – 7.22 (m, 1H), 7.21 (d, *J* = 1.9 Hz, 2H), 7.20 – 7.19 (m, 2H), 7.03 (d, *J* = 6.9 Hz, 1H), 5.52 (d, *J* = 3.5 Hz, 2H), 5.46 (d, *J* = 5.8 Hz, 2H), 3.71 (d, *J* = 1.5 Hz, 3H), 3.70 (s, 3H), 3.40 (td, *J* = 11.7, 6.1 Hz, 1H), 3.13 – 3.08 (m, 1H), 3.03 (dq, *J* = 11.3, 6.6, 6.0 Hz, 1H), 2.59 (d, *J* = 12.9 Hz, 1H), 2.49 (dt, *J* = 14.3, 7.6 Hz, 2H), 2.38 – 2.30 (m, 4H), 2.25 – 2.19 (m, 2H), 2.13 – 2.04 (m, 4H), 1.75 (dd, *J* = 12.4, 1.9 Hz, 2H), 1.69 – 1.66 (m, 2H), 1.59 – 1.56 (m, 1H), 1.48 – 1.44 (m, 1H), 1.36 (d, *J* = 5.5 Hz, 3H), 1.32 (s, 3H), 1.19 (d, *J* = 2.5 Hz, 6H).

**<sup>13</sup>C NMR** (125 MHz, CDCl<sub>3</sub>) δ 178.2, 140.2, 140.0, 139.5, 139.2, 137.6, 134.3, 134.1, 131.6, 128.9, 128.7, 127.5, 127.5, 127.1, 126.7, 126.6, 125.1, 124.6, 124.1, 122.2, 120.8, 118.9, 117.4, 109.0, 108.8, 108.2, 106.9, 53.5, 52.9, 51.4, 51.4, 46.7, 44.3, 44.2, 40.5, 38.9, 38.6, 37.9, 37.8, 33.4, 31.2, 29.8, 28.8, 28.8, 28.7, 24.1, 23.2, 22.8, 21.5, 20.9, 20.3.

**IR** (neat)  $\nu_{\max}$  3445, 2920, 1740, 1635, 1476, 1359, 1285, 1025, 942, 856, 726, 680 cm<sup>-1</sup>.

**HRMS** (ESI) *m/z*: [M]<sup>+</sup> calcd. for [C<sub>62</sub>H<sub>64</sub>N<sub>2</sub>O<sub>4</sub>]<sup>+</sup> 900.4866, found 900.4888.

[ $\alpha$ ]<sub>D</sub><sup>25</sup> = +89.3 (c = 0.5, CHCl<sub>3</sub>).

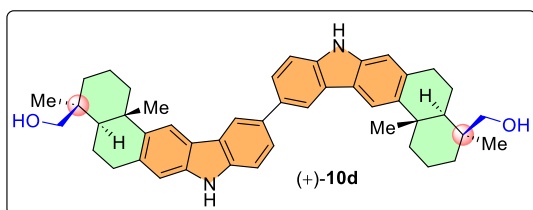

((4*S*,4*aR*,4'*S*,4'*aR*,13*bS*,13'*bS*)-4,4',13*b*,13'*b*-tetramethyl-2,2',3,3',4,4*a*,4',4'*a*,5,5',6,6',8,8',13*b*,13'*b*-hexadecahydro-1*H*,1'*H*-[11,11'-binaphtho[2,1-*b*]carbazole]-4,4'-diyl)dimethanol [(+)-10*d*]: Following the general procedure (+)-10*d* was obtained as yellow amorphous (0.55 mmol scale of reaction; 57% yield). *R*<sub>f</sub> = 0.3 (40% EtOAc in *n*-hexane).



**<sup>1</sup>H NMR** (500 MHz, DMSO)  $\delta$  11.18 – 10.79 (m, 2H), 8.43 (dd,  $J = 40.4, 1.9$  Hz, 1H), 8.32 (dd,  $J = 5.1, 1.8$  Hz, 1H), 8.12 (d,  $J = 4.5$  Hz, 1H), 7.75 (dd,  $J = 8.4, 1.7$  Hz, 1H), 7.73 – 7.67 (m, 1H), 7.55 (d,  $J = 8.3$  Hz, 1H), 7.53 – 7.43 (m, 1H), 7.34 (d,  $J = 8.7$  Hz, 1H), 7.27 (d,  $J = 8.5$  Hz, 1H), 7.06 (s, 1H), 4.32 – 4.24 (m, 2H), 3.71 – 3.66 (m, 2H), 3.56 (dd,  $J = 17.2, 6.5$  Hz, 1H), 3.07 (dd,  $J = 16.8, 6.4$  Hz, 1H), 2.99 – 2.91 (m, 1H), 2.64 – 2.58 (m, 1H), 2.40 (d,  $J = 12.5$  Hz, 1H), 2.21 – 2.15 (m, 1H), 1.98 – 1.85 (m, 4H), 1.82 (dd,  $J = 12.2, 6.4$  Hz, 1H), 1.72 (dq,  $J = 12.8, 7.3, 5.4$  Hz, 3H), 1.61 – 1.57 (m, 1H), 1.56 – 1.51 (m, 3H), 1.48 – 1.42 (m, 2H), 1.37 – 1.30 (m, 2H), 1.22 (s, 3H), 1.21 – 1.20 (m, 3H), 1.01 (d,  $J = 1.5$  Hz, 3H), 0.98 (d,  $J = 1.5$  Hz, 3H).

**<sup>13</sup>C NMR** (125 MHz, DMSO)  $\delta$  141.3, 140.2, 140.2, 139.1, 138.9, 138.7, 138.0, 133.0, 132.5, 132.5, 132.3, 130.0, 124.1, 123.9, 123.6, 122.6, 121.3, 120.7, 120.0, 118.0, 110.8, 109.8, 108.7, 62.6, 62.6, 51.4, 51.1, 38.5, 38.4, 37.7, 37.4, 35.1, 35.0, 31.3, 29.9, 29.0, 27.4, 27.3, 27.3, 26.4, 26.1, 26.0, 22.1, 18.9, 18.7.

**IR** (neat)  $\nu_{\max}$  **IR** (neat)  $\nu_{\max}$  3534, 3320, 1767, 1439, 1243, 1035, 823, 706, 572  $\text{cm}^{-1}$ .

**HRMS** (ESI)  $m/z$ :  $[\text{M} + \text{H}]^+$  calcd. for  $[\text{C}_{46}\text{H}_{52}\text{N}_2\text{O}_2 + \text{H}]^+$  665.4107, found 665.4101.

$[\alpha]^{25}_{589} = +32.5$  ( $c = 0.5$ , MeOH).

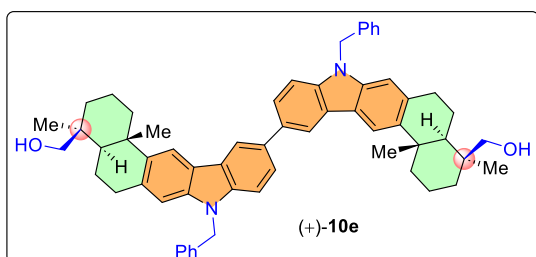

((4*S*,4*aR*,4'*S*,4'*aR*,13*bS*,13'*bS*)-8,8'-dibenzyl-4,4',13*b*,13'*b*-tetramethyl-

2,2',3,3',4,4*a*,4',4'*a*,5,5',6,6',8,8',13*b*,13'*b*-hexadecahydro-1*H*,1'*H*-[11,11'-binaphtho[2,1-*b*]carbazole]-4,4'-diyl)dimethanol [(+)-10e]: Following the general procedure (+)-10e was obtained as yellow amorphous (0.55 mmol scale of reaction; 61% yield).  $R_f = 0.3$  (30% EtOAc in *n*-hexane).

**<sup>1</sup>H NMR** (500 MHz, CDCl<sub>3</sub>) δ 8.39 (d, *J* = 59.7 Hz, 1H), 7.73 (d, *J* = 20.2 Hz, 1H), 7.47 – 7.40 (m, 1H), 7.31 – 7.26 (m, 2H), 7.25 (dd, *J* = 5.7, 1.1 Hz, 1H), 7.20 (td, *J* = 6.0, 5.5, 2.3 Hz, 2H), 5.49 (d, *J* = 27.8 Hz, 2H), 3.94 (dd, *J* = 11.0, 3.7 Hz, 1H), 3.77 – 3.67 (m, 1H), 3.66 – 3.59 (m, 1H), 3.20 – 2.95 (m, 1H), 2.76 – 2.59 (m, 1H), 2.44 (d, *J* = 12.8 Hz, 1H), 2.27 (dd, *J* = 12.9, 7.6 Hz, 1H), 2.03 (d, *J* = 9.1 Hz, 1H), 1.98 – 1.86 (m, 2H), 1.81 – 1.70 (m, 2H), 1.69 – 1.60 (m, 2H), 1.50 (d, *J* = 13.1 Hz, 1H), 1.31 (s, 3H), 1.11 (d, *J* = 14.6 Hz, 3H).

**<sup>13</sup>C NMR** (125 MHz, CDCl<sub>3</sub>) δ 141.2, 140.1, 139.2, 137.6, 134.1, 133.9, 131.1, 128.9, 127.5, 127.5, 126.7, 126.6, 126.6, 125.6, 125.0, 124.5, 124.0, 123.1, 122.3, 122.1, 120.8, 118.9, 118.7, 116.2, 109.0, 108.8, 108.3, 106.8, 65.5, 65.5, 51.8, 51.5, 51.4, 46.7, 40.0, 38.9, 38.9, 38.2, 38.0, 35.4, 35.4, 32.0, 30.6, 29.8, 27.0, 27.0, 27.0, 26.6, 26.2, 19.6, 19.3.

**IR** (neat)  $\nu_{\max}$  3600, 3337, 1751, 1415, 1240, 1085, 969, 720, 678 cm<sup>-1</sup>.

**HRMS** (ESI) *m/z*: [M]<sup>+</sup> calcd. for [C<sub>60</sub>H<sub>64</sub>N<sub>2</sub>O<sub>2</sub>]<sup>+</sup> 844.4968, found 844.4984.

[ $\alpha$ ]<sub>D</sub><sup>25</sup> = +11.8 (c = 0.4, CHCl<sub>3</sub>).

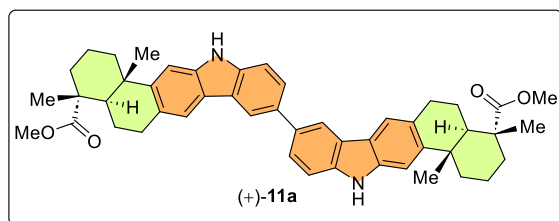

(4*R*,4*aR*,4'*R*,4'*aR*,13*bS*,13'*bS*)-**dimethyl 4,4',13*b*,13'*b*-tetramethyl-2,2',3,3',4,4*a*,4',4'*a*,5,5',6,6',12,12',13*b*,13'*b*-hexadecahydro-1*H*,1'*H*-[9,9'-binaphtho[1,2-*b*]carbazole]-4,4'-dicarboxylate [(+)-11*a*]**: Following the general procedure (+)-11*a* was obtained as brown amorphous (0.55 mmol scale of reaction; 72% yield). *R*<sub>f</sub> = 0.3 (20% EtOAc in *n*-hexane).

**<sup>1</sup>H NMR** (500 MHz, CDCl<sub>3</sub>) δ 8.30 (s, 1H), 7.90 (s, 1H), 7.77 (s, 1H), 7.72 – 7.70 (m, 1H), 7.40 (d, *J* = 8.3 Hz, 1H), 7.28 (s, 1H), 3.71 (s, 3H), 3.11 (s, 2H), 2.40 (d, *J* = 12.5 Hz, 1H), 2.36 (dd, *J* = 12.5, 2.5 Hz, 1H), 1.98 – 1.92 (m, 1H), 1.86 – 1.82 (m, 2H), 1.77 (q, *J* = 2.8 Hz, 1H), 1.71 – 1.68 (m, 1H), 1.66 – 1.63 (m, 1H), 1.51 (ddd, *J* = 13.0, 5.6, 3.1 Hz, 1H), 1.34 (s, 3H), 1.30 (s, 3H).

$^{13}\text{C}$  NMR (125 MHz,  $\text{CDCl}_3$ )  $\delta$  179.4, 148.6, 139.3, 139.2, 133.8, 126.6, 125.4, 124.0, 122.0, 120.3, 118.7, 110.6, 105.8, 52.1, 47.9, 45.1, 38.7, 38.0, 36.9, 30.1, 25.6, 22.1, 18.9, 16.8.

IR (neat)  $\nu_{\text{max}}$  3443, 2906, 1720, 1456, 1267, 1010, 823, 790, 576  $\text{cm}^{-1}$ .

HRMS (ESI)  $m/z$ :  $[\text{M}]^+$  calcd. for  $[\text{C}_{48}\text{H}_{52}\text{N}_2\text{O}_4]^+$  720.3927, found 720.3920.

$[\alpha]^{25}_{589} = +12.7$  ( $c = 0.4$ ,  $\text{CHCl}_3$ ).

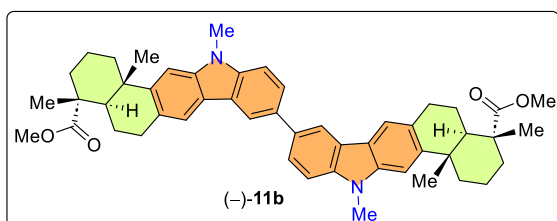

(4*R*,4*aR*,4'*R*,4'*aR*,13*bS*,13'*bS*)-dimethyl 4,4',12,12',13*b*,13'*b*-hexamethyl-2,2',3,3',4,4*a*,4',4'*a*,5,5',6,6',12,12',13*b*,13'*b*-hexadecahydro-1*H*,1'*H*-[9,9'-binaphtho[1,2-*b*]carbazole]-4,4'-dicarboxylate [(-)-11*b*]: Following the general procedure (-)-11*b* was obtained as colourless amorphous (0.55 mmol scale of reaction; 78% yield).  $R_f = 0.3$  (20% EtOAc in *n*-hexane).

$^1\text{H}$  NMR (500 MHz,  $\text{CDCl}_3$ )  $\delta$  8.33 (s, 1H), 7.84 (s, 1H), 7.79 (d,  $J = 8.4$  Hz, 1H), 7.41 (d,  $J = 8.0$  Hz, 1H), 7.27 (s, 1H), 3.86 (d,  $J = 9.7$  Hz, 3H), 3.70 (s, 3H), 3.16 (s, 2H), 2.53 (d,  $J = 12.4$  Hz, 1H), 2.39 (dd,  $J = 12.5, 2.4$  Hz, 1H), 1.97 (ddd,  $J = 12.6, 9.0, 3.6$  Hz, 1H), 1.88 – 1.79 (m, 3H), 1.71 (d,  $J = 11.1$  Hz, 2H), 1.56 – 1.51 (m, 1H), 1.35 (s, 6H).

$^{13}\text{C}$  NMR (125 MHz,  $\text{CDCl}_3$ )  $\delta$  179.3, 148.4, 140.8, 140.7, 133.2, 126.1, 125.2, 123.2, 121.4, 120.4, 118.7, 108.4, 103.5, 52.1, 47.9, 45.2, 38.9, 38.2, 36.8, 30.1, 29.3, 25.7, 22.2, 18.9, 16.8.

IR (neat)  $\nu_{\text{max}}$  3420, 2926, 1750, 1459, 1345, 1258, 1035, 940, 853, 756, 650  $\text{cm}^{-1}$ .

HRMS (ESI)  $m/z$ :  $[\text{M}]^+$  calcd. for  $[\text{C}_{50}\text{H}_{56}\text{N}_2\text{O}_4]^+$  748.4240, found 748.4237.

$[\alpha]^{25}_{589} = -3.9$  ( $c = 0.4$ ,  $\text{CHCl}_3$ ).

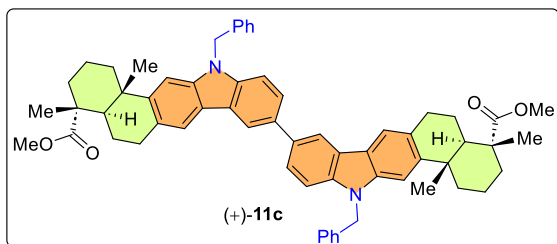

(4*R*,4*aR*,4'*R*,4'*aR*,13*bS*,13'*bS*)-dimethyl 12,12'-dibenzyl-4,4',13*b*,13'*b*-tetramethyl-2,2',3,3',4,4*a*,4',4'*a*,5,5',6,6',12,12',13*b*,13'*b*-hexadecahydro-1*H*,1'*H*-[9,9'-binaphtho[1,2-*b*]carbazole]-4,4'-dicarboxylate [(+)-11c]: Following the general procedure (+)-11c was obtained as colourless gel (0.55 mmol scale of reaction; 68% yield).  $R_f = 0.5$  (20% EtOAc in *n*-hexane).

<sup>1</sup>H NMR (500 MHz, CDCl<sub>3</sub>)  $\delta$  8.36 (s, 1H), 7.89 (s, 1H), 7.73 (dd,  $J = 8.4, 1.8$  Hz, 1H), 7.37 (d,  $J = 8.3$  Hz, 1H), 7.31 (d,  $J = 7.4$  Hz, 2H), 7.27 (s, 2H), 7.24 – 7.21 (m, 2H), 5.53 (s, 2H), 3.71 (s, 3H), 3.23 – 3.13 (m, 2H), 2.39 (dd,  $J = 12.6, 2.5$  Hz, 2H), 1.84 (q,  $J = 5.0$  Hz, 2H), 1.77 (t,  $J = 3.3$  Hz, 1H), 1.70 (d,  $J = 8.0$  Hz, 1H), 1.66 – 1.59 (m, 2H), 1.56 – 1.51 (m, 1H), 1.35 (s, 3H), 1.31 (s, 3H).

<sup>13</sup>C NMR (125 MHz, CDCl<sub>3</sub>)  $\delta$  179.3, 148.6, 140.4, 140.4, 137.6, 133.5, 128.9, 127.5, 126.7, 126.5, 125.4, 123.5, 121.7, 120.4, 118.8, 109.0, 104.0, 52.1, 47.9, 46.8, 45.1, 38.7, 38.1, 36.8, 30.1, 25.7, 22.1, 18.8, 16.8.

IR (neat)  $\nu_{\max}$  3405, 2922, 1765, 1690, 1467, 1395, 1285, 1020, 942, 856, 735, 680 cm<sup>-1</sup>.

HRMS (ESI)  $m/z$ : [M]<sup>+</sup> calcd. for [C<sub>62</sub>H<sub>64</sub>N<sub>2</sub>O<sub>4</sub>]<sup>+</sup> 900.4866, found 900.4851.

$[\alpha]^{25}_{589} = +1.6$  ( $c = 0.4$ , CHCl<sub>3</sub>).

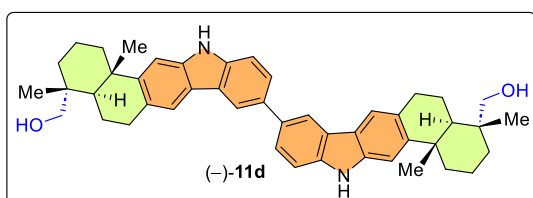

((4*R*,4*aR*,4'*R*,4'*aR*,13*bS*,13'*bS*)-4,4',13*b*,13'*b*-tetramethyl-2,2',3,3',4,4*a*,4',4'*a*,5,5',6,6',12,12',13*b*,13'*b*-hexadecahydro-1*H*,1'*H*-[9,9'-binaphtho[1,2-

**b]carbazole]-4,4'-diyl)dimethanol [(-)-11d]:** Following the general procedure (-)-11d was obtained as white amorphous (0.55 mmol scale of reaction; 55% yield).  $R_f = 0.35$  (40% EtOAc in *n*-hexane).

**<sup>1</sup>H NMR** (500 MHz, DMSO)  $\delta$  10.87 (s, 1H), 8.37 (s, 1H), 7.83 (s, 1H), 7.72 – 7.67 (m, 1H), 7.46 (d,  $J = 8.3$  Hz, 1H), 7.32 (s, 1H), 4.54 – 4.49 (m, 1H), 3.05 (d,  $J = 8.9$  Hz, 2H), 2.96 (dd,  $J = 10.7, 5.5$  Hz, 1H), 2.38 (d,  $J = 12.4$  Hz, 1H), 1.98 (dd,  $J = 3.1, 1.3$  Hz, 1H), 1.88 – 1.81 (m, 1H), 1.80 – 1.74 (m, 1H), 1.72 (s, 1H), 1.65 (d,  $J = 12.1$  Hz, 1H), 1.54 (q,  $J = 14.1, 11.6$  Hz, 2H), 1.40 (t,  $J = 12.9$  Hz, 1H), 1.24 (s, 3H), 0.82 (s, 3H).

**<sup>13</sup>C NMR** (125 MHz, DMSO)  $\delta$  148.5, 139.3, 139.2, 131.8, 125.6, 124.1, 123.0, 120.8, 119.7, 117.6, 110.8, 105.8, 70.0, 42.9, 37.8, 37.6, 34.9, 29.6, 25.5, 22.1, 18.6, 18.5, 17.7.

**IR** (neat)  $\nu_{\max}$  3500, 3320, 1720, 1439, 1243, 1085, 823, 760, 572  $\text{cm}^{-1}$ .

**HRMS** (ESI)  $m/z$ :  $[M + H]^+$  calcd. for  $[\text{C}_{46}\text{H}_{52}\text{N}_2\text{O}_2 + H]^+$  665.4107, found 665.4119.

$[\alpha]^{25}_{589} = -10.3$  ( $c = 0.2$ ,  $\text{CHCl}_3$ ).

#### **Procedure for the trapping of radical intermediate in hypervalent iodine (PIFA)-mediated oxidative dimerization reaction.**

To a stirred solution of monomeric indolosesquiterpenoid **8a** (50 mg, 0.14 mmol, 1.0 equiv.) in  $\text{CH}_2\text{Cl}_2$  (2 mL),  $\text{BF}_3 \cdot \text{OEt}_2$  (40  $\mu\text{L}$ , 0.14 mmol, 1.0 equiv.), PIFA (60 mg, 0.14 mmol, 1.0 equiv.) at  $-78$  °C, TEMPO (23 mg, 0.14 mmol, 1 equiv.) was quickly added. The reaction mixture was then stirred for 2 hours, while the reaction temperature was maintained at  $-78$  °C. After 2h of the reaction saturated aqueous  $\text{NaHCO}_3$  (ca. 20 mL) was added to the mixture, and then stirred for an additional 10 minutes at ambient temperature. The organic layer was separated and the aqueous phase was extracted with  $\text{CH}_2\text{Cl}_2$ . The combined extract was dried with  $\text{Na}_2\text{SO}_4$  and evaporated to dryness. The residue was purified by column chromatography ( $\text{SiO}_2$  (neutral)/*n*-hexane-EtOAc) to give C-C dimeric indolosesquiterpenoid **9a**. The crude reaction mixture before quenching was taken for mass spectrometry. From the mass spectrum

we got the two required mass peaks, one of which is in compliance with TEMPO adduct with one unit of model substrate and another is the C-C dimer product.

**HRMS (ESI)  $m/z$ :**  $[M + H]^+$  calcd. for  $[C_{33}H_{44}N_2O_3 + H]^+$  517.3430, found 517.3439.

**HRMS (ESI)  $m/z$ :**  $[M + H]^+$  calcd. for  $[C_{48}H_{52}N_2O_4 + H]^+$  721.4005, found 721.4002.

### Dehydroxylation of Xiamycin D (+)-13:

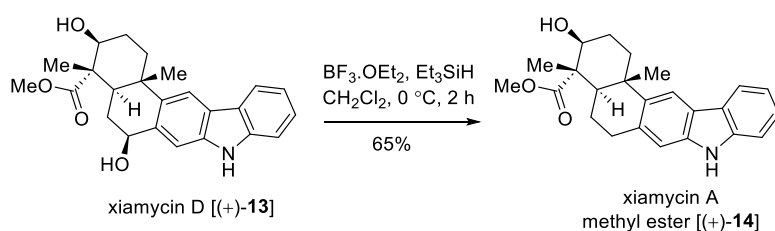

A flame-dried round-bottom flask was charged with Xiamycin D (+)-13 (172 mg, 0.44 mmol, 1.0 equiv.) in dichloromethane (10 mL) under an inert atmosphere. To this reaction mixture,  $BF_3 \cdot OEt_2$  (81.4  $\mu\text{L}$ , 0.66 mmol, 1.5 equiv.) was added at  $0\text{ }^\circ\text{C}$  temperature followed by the addition of triethylsilane (140.2  $\mu\text{L}$ , 0.88 mmol, 2.0 equiv.). Finally, the reaction mixture was allowed to run at  $25\text{ }^\circ\text{C}$  for 2 h. Upon completion of the reaction, the reaction mixture was diluted with 15 mL of dichloromethane and then it was extracted with 10 mL of saturated sodium bicarbonate. The organic layers were dried over sodium sulphate and the crude materials were purified by flash chromatography using EtOAc in *n*-hexane to afford Xiamycin A methyl ester (+)-14 as white foam (108 mg, 65%).

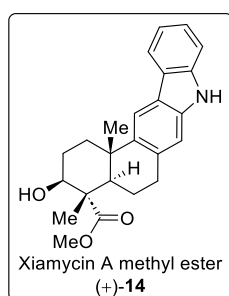

(3*S*,4*S*,4*aR*,13*bS*)-methyl 3-hydroxy-4,13*b*-dimethyl-2,3,4,4*a*,5,6,8,13*b*-octahydro-1*H*-naphtho[2,1-*b*]carbazole-4-carboxylate [(+)-14]: Xiamycin A methyl ester (+)-14 was

obtained as white foam (0.44 mmol scale of reaction; 65% yield).  $R_f = 0.5$  (40% EtOAc in *n*-hexane).

**$^1\text{H}$  NMR** (500 MHz,  $\text{CDCl}_3$ )  $\delta$  8.01 (dd,  $J = 7.8, 0.9$  Hz, 1H), 7.94 (s, 1H), 7.85 (s, 1H), 7.37 – 7.36 (m, 2H), 7.21 – 7.18 (m, 1H), 7.07 (s, 1H), 4.10 (dd,  $J = 11.2, 4.4$  Hz, 1H), 3.75 (s, 3H), 3.12 – 3.05 (m, 2H), 2.59 (dt,  $J = 12.7, 2.8$  Hz, 1H), 2.23 (dd,  $J = 12.5, 2.4$  Hz, 1H), 2.03 – 1.94 (m, 2H), 1.90 – 1.80 (m, 2H), 1.50 (ddd,  $J = 13.1, 6.8, 2.8$  Hz, 1H), 1.31 (s, 6H).

**$^{13}\text{C}$  NMR** (125 MHz,  $\text{CDCl}_3$ )  $\delta$  178.0, 141.3, 140.2, 138.4, 133.5, 125.6, 123.8, 122.2, 120.1, 119.3, 115.8, 110.6, 110.0, 75.5, 54.0, 52.4, 46.0, 37.6, 37.4, 30.9, 27.6, 26.0, 21.7, 10.9.

**IR** (neat)  $\nu_{\text{max}}$  3409, 2926, 2854, 1715, 1612, 1466, 1320, 1244, 1133, 1069, 940, 800, 735, 606, 536  $\text{cm}^{-1}$ .

**HRMS** (ESI)  $m/z$ :  $[\text{M} + \text{Na}]^+$  calcd. for  $[\text{C}_{24}\text{H}_{27}\text{NO}_3 + \text{Na}]^+$  400.1889, found 400.1901.

$[\alpha]_{589}^{25} = +49.5$  ( $c = 0.2$ ,  $\text{CHCl}_3$ ); lit.<sup>4</sup>  $[\alpha]_{\text{D}}^{20} = +75.9$  ( $c = 0.216$ ,  $\text{CHCl}_3$ ).

#### Chemical Shifts of $^1\text{H}$ -NMR for Natural and Synthetic Xiamycin A methyl ester (+)-14

| This Report<br>(500 MHz, $\text{CDCl}_3$ ) | Natural <sup>3</sup><br>(300 MHz, $\text{CD}_3\text{OD}$ ) | Dethe <sup>4</sup><br>(500 MHz, $\text{CDCl}_3$ ) |
|--------------------------------------------|------------------------------------------------------------|---------------------------------------------------|
| 8.01 (dd, $J = 7.8, 0.9$ Hz, 1H)           | 7.96 (dd, $J = 7.7, 1.1$ Hz, 1H)                           | 7.99 (d, $J = 7.8$ Hz, 1H)                        |
| 7.94 (s, 1H)                               | 7.92 (s, 1 H)                                              | 7.92 (s, 1H)                                      |
| 7.85 (s, 1H)                               | -                                                          | 7.84 (s, 1H)                                      |
| 7.37 – 7.36 (m, 2H)                        | 7.34 (dd, $J = 8.0, 1.1$ Hz, 1H)                           | 7.36 – 7.32 (m, 2H)                               |

|                                         |                                                          |                                       |
|-----------------------------------------|----------------------------------------------------------|---------------------------------------|
|                                         | 7.27 (ddd, $J = 8.0, 7.4, 1.1$ Hz, 1H)                   |                                       |
| 7.21 – 7.18 (m, 1H)                     | 7.08 (ddd, $J = 8.1, 7.3, 1.1$ Hz, 1H)                   | 7.18 (dt, $J = 8.0, 5.5, 2.6$ Hz, 1H) |
| 7.07 (s, 1H)                            | 7.05 (s, 1H)                                             | 7.04 (s, 1H)                          |
| 4.10 (dd, $J = 11.2, 4.4$ Hz, 1H)       | 4.05 (dd, $J = 9.1, 7.1$ Hz, 1H)                         | 4.08 (dd, $J = 11.2, 4.4$ Hz, 1H)     |
| 3.75 (s, 3H)                            | 3.71 (s, 3H)                                             | 3.73 (s, 3H)                          |
| 3.12 – 3.05 (m, 2H)                     | 3.09 (dd, $J = 16.7, 6.1$ Hz, 1H)<br>2.98 (m, 1H)        | 3.11 – 3.04 (m, 2H)                   |
| 2.59 (dt, $J = 12.7, 2.8$ Hz, 1H)       | 2.61 (td, $J = 13.1, 3.0$ Hz, 1H)                        | 2.57 (d, $J = 12.7$ Hz, 1H)           |
| 2.23 (dd, $J = 12.5, 2.4$ Hz, 1H)       | 2.13 (dd, $J = 12.5, 2.0$ Hz, 1H)                        | 2.21 (dd, $J = 12.5, 2.3$ Hz, 1H)     |
| 2.03 – 1.94 (m, 2H)                     | 2.00 (ddd, $J = 13.4, 12.8, 7.0$ Hz, 1H)<br>1.88 (m, 1H) | 2.03–1.93 (m, 2H)                     |
| 1.90 – 1.80 (m, 2H)                     | 1.88 (m, 1H)<br>1.74 (m, 1H)                             | 1.87 – 1.78 (m, 2H)                   |
| 1.50 (ddd, $J = 13.1, 6.8, 2.8$ Hz, 1H) | 1.38 (m, 1H)                                             | 1.48 (dd, $J = 11.7, 5.2$ Hz, 1H)     |
| 1.31 (s, 6H)                            | 1.29 (s, 3H)<br>1.23 (s, 3H)                             | 1.29 (s, 6H)                          |

**Chemical Shifts of  $^{13}\text{C}$ -NMR for Natural and Synthetic Xiamycin A methyl ester (+)-14**

| <b>This Report</b><br><b>(125 MHz, <math>\text{CDCl}_3</math>)</b> | <b>Natural<sup>3</sup></b><br><b>(125.76 MHz, <math>\text{CD}_3\text{OD}</math>)</b> | <b>Dethe<sup>4</sup></b><br><b>(125 MHz, <math>\text{CDCl}_3</math>)</b> |
|--------------------------------------------------------------------|--------------------------------------------------------------------------------------|--------------------------------------------------------------------------|
| 178.0                                                              | 179.8                                                                                | 177.8                                                                    |
| 141.3                                                              | 142.0                                                                                | 141.0                                                                    |
| 140.2                                                              | 141.8                                                                                | 139.9                                                                    |
| 138.4                                                              | 140.2                                                                                | 138.1                                                                    |



|       |       |        |
|-------|-------|--------|
| 133.5 | 133.9 | 133.3  |
| 125.6 | 126.1 | 125.4  |
| 123.8 | 124.6 | 123.5  |
| 122.2 | 123.1 | 121.9  |
| 120.1 | 120.5 | 119.8  |
| 119.3 | 119.4 | 119.1  |
| 115.8 | 116.3 | 115.6  |
| 110.6 | 111.5 | 110.44 |
| 110.0 | 110.8 | 109.80 |
| 75.5  | 76.3  | 75.28  |
| 54.0  | 55.4  | 53.79  |
| 52.4  | 52.6  | 52.25  |
| 46.0  | 48.1  | 45.86  |
| 37.6  | 39.0  | 37.37  |
| 37.4  | 38.4  | 37.24  |
| 30.9  | 31.9  | 30.74  |
| 27.6  | 28.5  | 27.42  |
| 26.0  | 26.3  | 25.81  |
| 21.7  | 22.6  | 21.48  |
| 10.9  | 11.3  | 10.71  |

### Oxidative Dimerization of Xiamycin A methyl ester (+)-**14**:

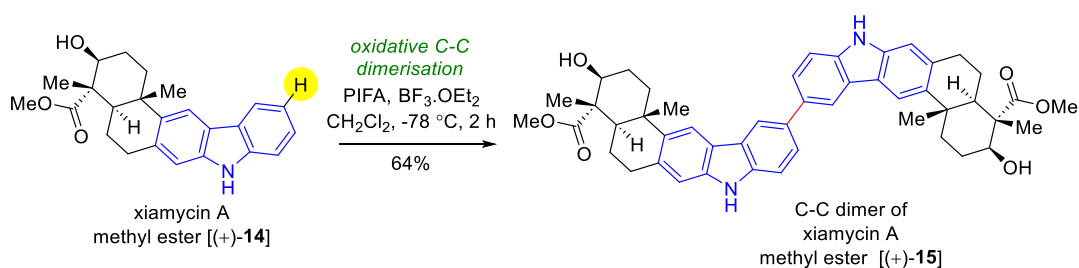

To a stirred solution of Xiamycin A methyl ester (+)-**14** (45 mg, 0.12 mmol, 1.0 equiv.) in CH<sub>2</sub>Cl<sub>2</sub> (4 mL), PIFA (51.6 mg, 0.12 mmol, 1.0 equiv.) and BF<sub>3</sub>.OEt<sub>2</sub> (17 μL, 0.12 mmol, 1.0

equiv.) were quickly added at  $-78\text{ }^{\circ}\text{C}$ . The reaction mixture was then stirred for 2 hour, while the reaction temperature was maintained at  $-78\text{ }^{\circ}\text{C}$ . After the reaction completion, saturated aqueous  $\text{NaHCO}_3$  (ca. 2 mL) was added to the mixture, and then stirred for an additional 10 minutes at ambient temperature. The organic layer was separated and the aqueous phase was extracted with  $\text{CH}_2\text{Cl}_2$ . The combined extract was dried with  $\text{Na}_2\text{SO}_4$  and evaporated to dryness. The residue was purified by flash chromatography using EtOAc in *n*-hexane to afford dimer (+)-**15** as brown amorphous (28.9 mg, 64%).

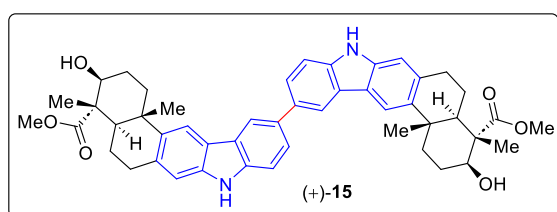

(3*S*,3'*S*,4*S*,4*aR*,4'*S*,4'*aR*,13*bS*,13'*bS*)-dimethyl 3,3'-dihydroxy-4,4',13*b*,13'*b*-tetramethyl-2,2',3,3',4,4*a*,4',4'*a*,5,5',6,6',8,8',13*b*,13'*b*-hexadecahydro-1*H*,1'*H*-[11,11'-binaphtho[2,1-*b*]carbazole]-4,4'-dicarboxylate [(+)-**15**]: (+)-**15** was obtained as brown amorphous (0.12 mmol scale of reaction; 64% yield).  $R_f = 0.5$  (70% EtOAc in *n*-hexane).

$^1\text{H NMR}$  (500 MHz, DMSO)  $\delta$  10.91 (s, 1H), 8.50 (s, 1H), 8.18 (s, 1H), 7.76 (d,  $J = 8.5$  Hz, 1H), 7.49 (d,  $J = 8.3$  Hz, 1H), 7.11 (s, 1H), 4.80 (d,  $J = 5.2$  Hz, 1H), 3.93 (t,  $J = 9.8$  Hz, 1H), 3.65 (s, 3H), 3.14 – 3.08 (m, 1H), 2.97 (dt,  $J = 17.8, 9.4$  Hz, 1H), 2.66 (d,  $J = 11.2$  Hz, 1H), 2.06 (d,  $J = 12.7$  Hz, 1H), 1.95 (t,  $J = 9.9$  Hz, 1H), 1.79 (d,  $J = 16.1$  Hz, 3H), 1.69 (d,  $J = 13.5$  Hz, 1H), 1.26 (s, 6H).

$^{13}\text{C NMR}$  (125 MHz, DMSO)  $\delta$  177.3, 140.4, 139.1, 138.8, 132.6, 131.9, 124.2, 123.5, 121.5, 117.7, 115.9, 110.9, 109.8, 74.0, 59.7, 53.6, 51.8, 46.2, 36.8, 31.3, 30.2, 29.0, 27.5, 25.5, 22.1, 14.1, 10.9.

**IR** (neat)  $\nu_{\text{max}}$  3430, 2925, 1765, 1653, 1466, 1385, 1290, 1052, 953, 845, 762, 669  $\text{cm}^{-1}$ .

**HRMS** (ESI)  $m/z$ :  $[\text{M} + \text{H}]^+$  calcd. for  $[\text{C}_{48}\text{H}_{52}\text{N}_2\text{O}_6 + \text{H}]^+$  753.3904, found 753.3896.

$[\alpha]_{589}^{25} = +87.3$  ( $c = 0.5$ , MeOH).

## Hydrolysis of Xiamycin A methyl ester (+)-14:

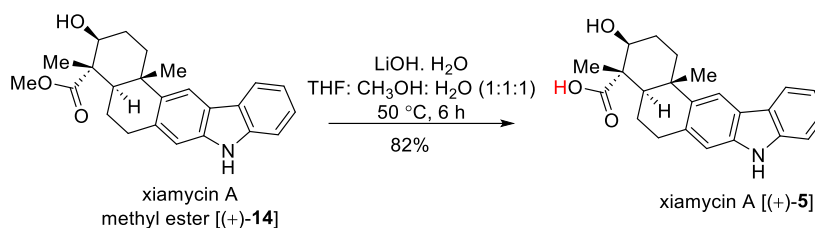

In an oven dried round-bottom flask Xiamycin A methyl ester [(+)-14] (63 mg, 0.17 mmol, 1.0 equiv.) was taken in a mixture of THF, methanol and water [THF: MeOH: H<sub>2</sub>O (1:1:1)]. To the solution LiOH · H<sub>2</sub>O (280.4 mg, 6.68 mmol, 40 equiv.) were added and reaction mixture was refluxed for 10 h at 50 °C. After completion of the reaction confirmed by TLC, reaction mixture was quenched with 4(N) HCl at 0 °C and the pH of the reaction mixture was adjusted to ~1-2. Then the reaction mixture was extracted with ethyl acetate (8 mL X 2). The organic layer was collected, dried over Na<sub>2</sub>SO<sub>4</sub> and concentrated under reduced pressure. The crude product was purified by flash column chromatography with ~80-90% EtOAc in *n*-hexane to afford Xiamycin A [(+)-5] as white solid (50.7 mg, 82% yield).

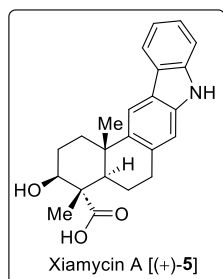

**(3*S*,4*S*,4*a**R*,13*b**S*)-3-hydroxy-4,13*b*-dimethyl-2,3,4,4*a*,5,6,8,13*b*-octahydro-1*H*-naphtho[2,1-*b*]carbazole-4-carboxylic acid [(+)-5]:** Xiamycin A (+)-5 was obtained as white solid (0.17 mmol scale of reaction; 82% yield). *R*<sub>f</sub> = 0.3 (70% EtOAc in *n*-hexane).

**<sup>1</sup>H NMR** (500 MHz, CD<sub>3</sub>OD) δ 7.99 (d, *J* = 7.7 Hz, 1H), 7.96 (s, 1H), 7.37 (d, *J* = 8.1 Hz, 1H), 7.33 – 7.28 (m, 1H), 7.11 (d, *J* = 7.5 Hz, 1H), 7.09 (s, 1H), 4.14 – 4.10 (m, 1H), 3.13 (dd, *J* = 16.9, 6.6 Hz, 1H), 3.05 (ddd, *J* = 17.3, 11.1, 7.5 Hz, 1H), 2.65 (dt, *J* = 13.2, 3.5 Hz, 1H), 2.17 (d, *J* = 2.1 Hz, 1H), 2.07 – 2.02 (m, 1H), 1.92 (td, *J* = 9.9, 9.4, 3.2 Hz, 2H), 1.77 (dd, *J* = 12.8, 7.5 Hz, 1H), 1.56 (ddd, *J* = 12.7, 6.1, 3.9 Hz, 1H), 1.32 (s, 3H), 1.27 (s, 3H).

$^{13}\text{C}$  NMR (125 MHz,  $\text{CD}_3\text{OD}$ )  $\delta$  181.2, 142.0, 141.8, 140.0, 134.1, 126.0, 124.7, 123.1, 120.5, 119.4, 116.3, 111.5, 110.8, 76.3, 54.9, 47.9, 39.0, 38.3, 32.0, 28.7, 26.3, 22.6, 11.4.

IR (neat)  $\nu_{\text{max}}$  3340, 2926, 2854, 2454, 1652, 1460, 1320, 1244, 1133, 1069, 940, 735, 606, 563  $\text{cm}^{-1}$ .

HRMS (ESI)  $m/z$ :  $[\text{M} + \text{H}]^+$  calcd. for  $[\text{C}_{23}\text{H}_{25}\text{NO}_3 + \text{H}]^+$  364.1913, found 364.1906.

$[\alpha]^{25}_{589} = +118.6$  ( $c = 1.0$ , MeOH); lit.<sup>5</sup>  $[\alpha]^{22}_{\text{D}} = +123.5$  ( $c = 0.4$ , MeOH).

### Chemical Shifts of $^1\text{H}$ -NMR for Natural and Synthetic Xiamycin A (+)-5

| Bisai<br>(500 MHz, $\text{CD}_3\text{OD}$ )                                   | Natural <sup>3</sup><br>(500 MHz, $\text{CD}_3\text{OD}$ ) | Sarpong <sup>5</sup><br>(700 MHz, $\text{CD}_3\text{OD}$ ) |
|-------------------------------------------------------------------------------|------------------------------------------------------------|------------------------------------------------------------|
| 7.99 (d, $J = 7.7$ Hz, 1H)                                                    | 7.96 (d, $J = 8.0$ Hz, 1H)                                 | 7.97 (d, $J = 8.0$ Hz, 1H)                                 |
| 7.96 (s, 1H)                                                                  | 7.91 (s, 1H)                                               | 7.94 (s, 1H)                                               |
| 7.37 (d, $J = 8.1$ Hz, 1H)                                                    | 7.35 (d, $J = 8.0$ Hz, 1H)                                 | 7.35 (d, $J = 8.0$ Hz, 1H)                                 |
| 7.33 – 7.28 (m, 1H)                                                           | 7.28 (dt, $J = 7.0, 1.0$ Hz, 1H)                           | 7.29 (t, $J = 7.9$ Hz, 1H)                                 |
| 7.11 (d, $J = 7.5$ Hz, 1H)                                                    | 7.08 (dt, $J = 7.0, 1.0$ Hz, 1H)                           | 7.09 (t, $J = 7.5$ Hz, 1H)                                 |
| 7.09 (s, 1H)                                                                  | 7.07 (s, 1H)                                               | 7.07 (s, 1H)                                               |
| 4.14 – 4.10 (m, 1H)                                                           | 4.09 (dd, $J = 10.5, 7.5$ Hz, 1H)                          | 4.10 (dd, $J = 10.5, 7.5$ Hz, 1H)                          |
| 3.13 (dd, $J = 16.9, 6.6$ Hz, 1H)<br>3.05 (ddd, $J = 17.3, 11.1, 7.5$ Hz, 1H) | 3.09 (m, 2H)                                               | 3.15-3.08 (m, 1H)<br>3.08-2.99 (m, 1H)                     |
| 2.65 (dt, $J = 13.2, 3.5$ Hz, 1H)                                             | 2.58 (dt, $J = 13.1, 1.5$ Hz, 1H)                          | 2.64 (d, $J = 12.8$ Hz, 1H)                                |
| 2.17 (d, $J = 2.1$ Hz, 1H)                                                    | 2.18 (dd, $J = 12.6, 2.3$ Hz, 1H)                          | 2.14 (d, $J = 11.8$ Hz, 1H)                                |
| 2.07 – 2.02 (m, 1H)                                                           | 2.00 (qd, $J = 12.6, 7.3$ Hz, 1H)                          | 2.08-1.98 (m, 1H)                                          |

|                                         |                                                   |                   |
|-----------------------------------------|---------------------------------------------------|-------------------|
| 1.92 (td, $J = 9.9, 9.4, 3.2$ Hz, 2H)   | 1.90 (m, 1H)<br>1.86 (qd, $J = 13.1, 2.9$ Hz, 1H) | 1.93-1.88 (m, 2H) |
| 1.77 (dd, $J = 12.8, 7.5$ Hz, 1H)       | 1.76 (dt, $J = 12.3, 6.7$ Hz, 1H)                 | 1.78-1.72 (m, 1H) |
| 1.56 (ddd, $J = 12.7, 6.1, 3.9$ Hz, 1H) | 1.56 (m, 1H)                                      | 1.58-1.53 (m, 1H) |
| 1.32 (s, 3H)                            | 1.28 (s, 3H)                                      | 1.30 (s, 3H)      |
| 1.27 (s, 3H)                            | 1.23 (s, 3H)                                      | 1.25 (s, 3H)      |

### Chemical Shifts of $^{13}\text{C}$ -NMR for Natural and Synthetic Xiamycin A (+)-5

| <b>Bisai</b><br><b>(125 MHz, CD<sub>3</sub>OD)</b> | <b>Natural<sup>3</sup></b><br><b>(151 MHz, CD<sub>3</sub>OD)</b> | <b>Sarpong<sup>5</sup></b><br><b>(176 MHz, CD<sub>3</sub>OD)</b> |
|----------------------------------------------------|------------------------------------------------------------------|------------------------------------------------------------------|
| 181.2                                              | 181.3                                                            | 181.3                                                            |
| 142.0                                              | 142.0                                                            | 142.0                                                            |
| 141.8                                              | 141.8                                                            | 141.8                                                            |
| 140.0                                              | 140.1                                                            | 140.1                                                            |
| 134.1                                              | 134.0                                                            | 134.0                                                            |
| 126.0                                              | 126.0                                                            | 126.0                                                            |
| 124.7                                              | 124.7                                                            | 124.6                                                            |
| 123.1                                              | 123.1                                                            | 123.1                                                            |
| 120.5                                              | 120.5                                                            | 120.6                                                            |
| 119.4                                              | 119.3                                                            | 119.3                                                            |
| 116.3                                              | 116.3                                                            | 116.4                                                            |
| 111.5                                              | 111.5                                                            | 111.4                                                            |
| 110.8                                              | 110.8                                                            | 110.8                                                            |
| 76.3                                               | 76.3                                                             | 76.3                                                             |
| 54.9                                               | 54.9                                                             | 54.9                                                             |
| 47.9                                               | 47.9                                                             | 47.9                                                             |
| 39.0                                               | 39.0                                                             | 39.0                                                             |
| 38.3                                               | 38.3                                                             | 38.3                                                             |

|      |      |      |
|------|------|------|
| 32.0 | 32.0 | 32.1 |
| 28.7 | 28.6 | 28.7 |
| 26.3 | 26.3 | 26.3 |
| 22.6 | 22.6 | 22.6 |
| 11.4 | 11.4 | 11.4 |

### Oxidative Dimerization of Xiamycin A (+)-5:

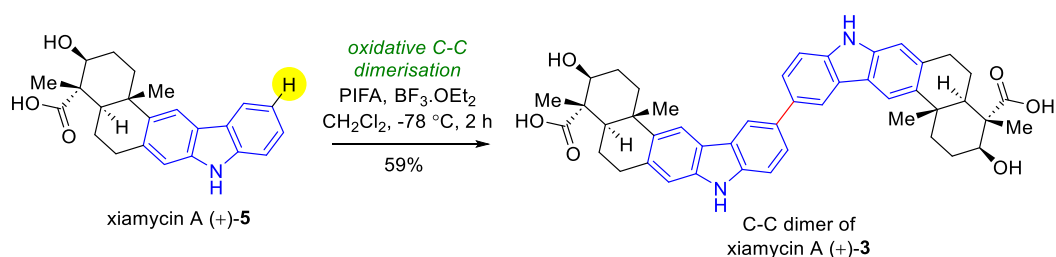

To a stirred solution of xiamycin A [(+)-5] (50 mg, 0.14 mmol, 1.0 equiv.) in DMF (0.5 mL) and CH<sub>2</sub>Cl<sub>2</sub> (3.5 mL), PIFA (60.2 mg, 0.14 mmol, 1.0 equiv.) and BF<sub>3</sub>·OEt<sub>2</sub> (17.3 μL, 0.14 mmol, 1.0 equiv.) were quickly added at -78 °C. The reaction mixture was then stirred for 2 hour, while the reaction temperature was maintained at -78 °C. After the reaction completion, saturated aqueous NaHCO<sub>3</sub> (ca. 2 mL) was added to the mixture, and then stirred for an additional 10 minutes at ambient temperature. The organic layer was separated and the aqueous phase was extracted with CH<sub>2</sub>Cl<sub>2</sub>. The combined extract was dried with Na<sub>2</sub>SO<sub>4</sub> and evaporated to dryness. The residue was purified by flash chromatography using EtOAc in *n*-hexane to afford dimer (+)-3 as white amorphous (29.9 mg, 59%).

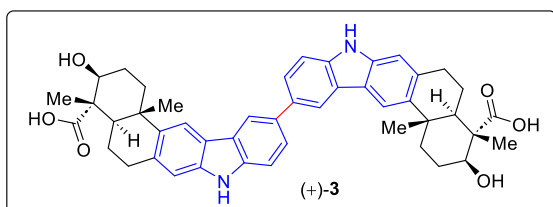

(3*S*,3'*S*,4*S*,4*aR*,4'*S*,4'*aR*,13*bS*,13'*bS*)-3,3'-dihydroxy-4,4',13*b*,13'*b*-tetramethyl-2,2',3,3',4,4*a*,4',4'*a*,5,5',6,6',8,8',13*b*,13'*b*-hexadecahydro-1*H*,1'*H*-[11,11'-binaphtho[2,1-*b*]carbazole]-4,4'-dicarboxylic acid [(+)-3]: Following the general procedure (+)-3 was

obtained as white amorphous (0.14 mmol scale of reaction; 59% yield).  $R_f = 0.1$  (10% MeOH in  $\text{CH}_2\text{Cl}_2$ ).

**$^1\text{H NMR}$**  (500 MHz, DMSO)  $\delta$  12.11 (s, 1H), 10.91 (s, 1H), 8.49 (s, 1H), 8.17 (s, 1H), 7.74 (d,  $J = 6.7$  Hz, 1H), 7.48 (d,  $J = 8.3$  Hz, 1H), 7.10 (s, 1H), 4.71 (s, 1H), 3.92 (s, 1H), 3.14 – 3.08 (m, 1H), 2.99 – 2.95 (m, 1H), 2.66 – 2.62 (m, 1H), 2.04 – 1.98 (m, 2H), 1.93 (s, 1H), 1.78 (s, 3H), 1.64 (s, 2H), 1.44 (s, 1H), 1.34 (s, 3H), 1.13 (s, 3H).

**$^{13}\text{C NMR}$**  (125 MHz, DMSO)  $\delta$  178.8, 140.6, 139.2, 138.8, 132.7, 131.9, 123.6, 121.5, 117.7, 115.9, 114.6, 110.9, 109.9, 74.0, 52.8, 36.8, 31.6, 31.3, 28.7, 25.6, 22.1, 14.0, 11.0.

**IR** (neat)  $\nu_{\text{max}}$  3360, 2962, 2834, 2454, 1625, 1400, 1325, 1270, 1135, 1075, 968, 735, 630, 556  $\text{cm}^{-1}$ .

**HRMS** (ESI)  $m/z$ :  $[\text{M} + \text{Na}]^+$  calcd. for  $[\text{C}_{46}\text{H}_{48}\text{N}_2\text{O}_6 + \text{Na}]^+$  747.3410, found 747.3448.

$[\alpha]^{25}_{589} = +128.3$  ( $c = 0.3$ , MeOH).

## References:

1. M. Munda,<sup>‡</sup> R. Nandi,<sup>‡</sup> V. R. Gavit, S. Kundu, S. Niyogi and A. Bisai, *Chem. Sci.*, 2022, **13**, 11666–11671. [<sup>‡</sup> contributed equally]
2. S. W. Pelletier and D. L. Herald, jun, *J. Chem. Soc. D*, 1971, 10b-11.
3. L. Ding, J. Münch, H. Goerls, A. Maier, H. H. Fiebig, W. H. Lin and C. Hertweck, *Bioorg. Med. Chem. Lett.*, 2010, **20**, 6685–6687.
4. D. H. Dethe and M. Shukla, *Chem. Commun.*, 2021, **57**, 10644-10646.
5. M. Pfaffenbach, I. Bakanas, N. R. O'Connor, J. L. Herrick and R. Sarpong, *Angew. Chem. Int. Ed.*, 2019, **58**, 15304–15308.

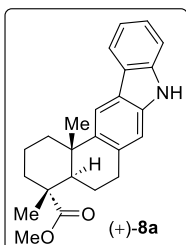

### Spectral Data



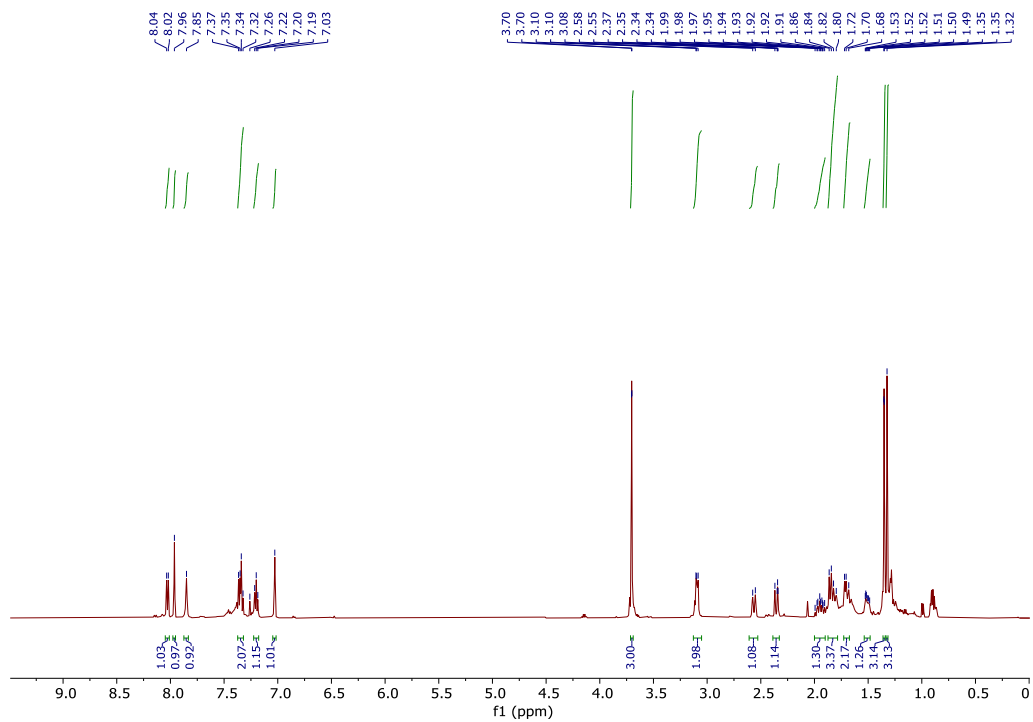

$^1\text{H}$  NMR (500 MHz,  $\text{CDCl}_3$ ) of (+)-**8a**

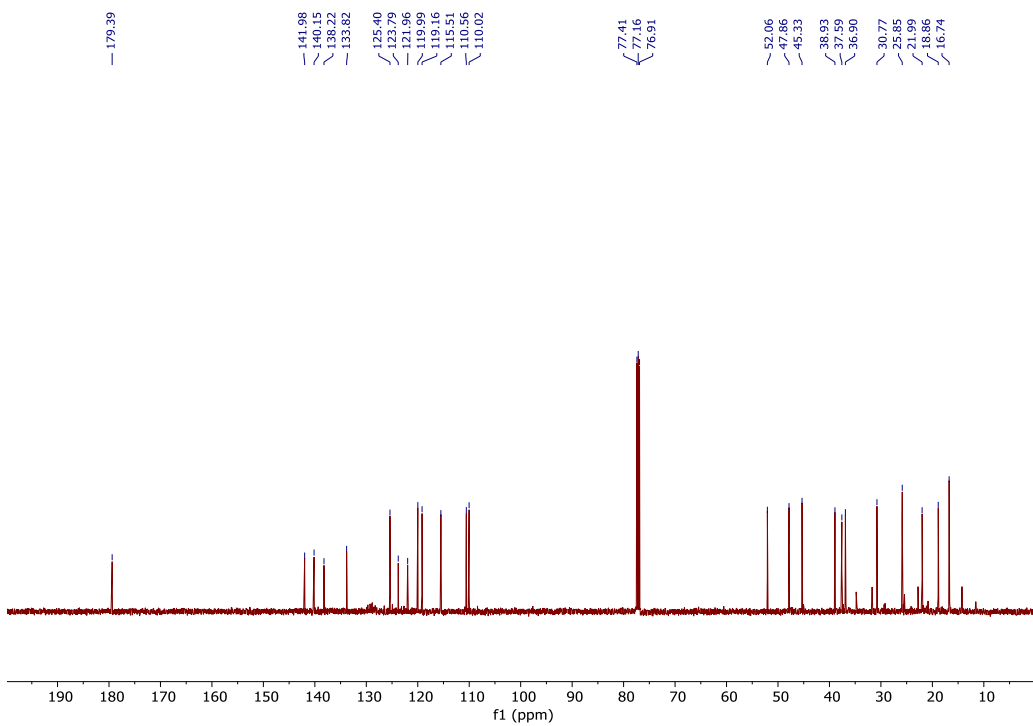

$^{13}\text{C}$  NMR (125 MHz,  $\text{CDCl}_3$ ) of (+)-**8a**

## Display Report

|                                                         |                                        |
|---------------------------------------------------------|----------------------------------------|
| <b>Analysis Info</b>                                    | Acquisition Date 2/26/2021 11:45:11 AM |
| Analysis Name D:\Data\User data\2021\FEB\AB_MM_01_104.d |                                        |
| Method Tune_pos_Mid.m                                   | Operator IISER Kolkata                 |
| Sample Name AB_MM_01_104                                | Instrument maXis Impact 8282001.00127  |
| Comment                                                 |                                        |

|                              |          |                      |          |                  |           |
|------------------------------|----------|----------------------|----------|------------------|-----------|
| <b>Acquisition Parameter</b> |          |                      |          |                  |           |
| Source Type                  | ESI      | Ion Polarity         | Positive | Set Nebulizer    | 0.4 Bar   |
| Focus                        | Active   | Set Capillary        | 3400 V   | Set Dry Heater   | 200 °C    |
| Scan Begin                   | 50 m/z   | Set End Plate Offset | -500 V   | Set Dry Gas      | 4.0 l/min |
| Scan End                     | 3000 m/z | Set Charging Voltage | 2000 V   | Set Divert Valve | Source    |
|                              |          | Set Corona           | 0 nA     | Set APCI Heater  | 0 °C      |

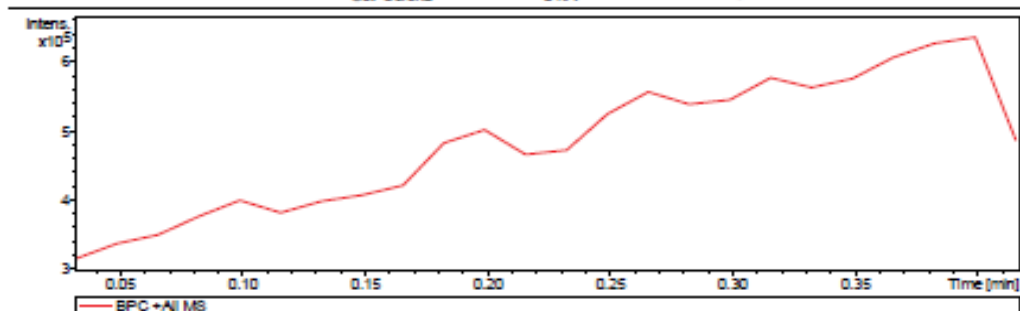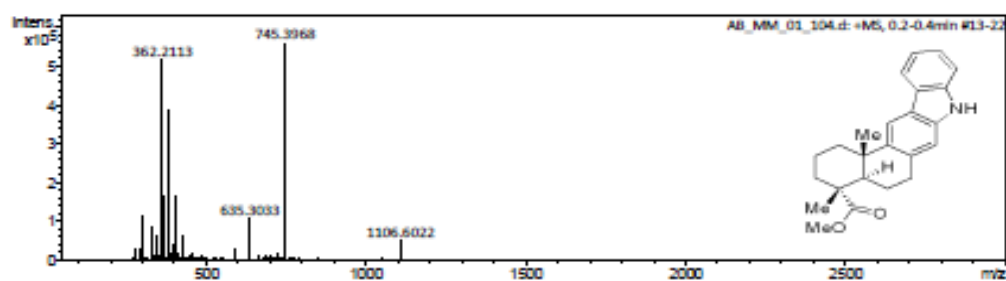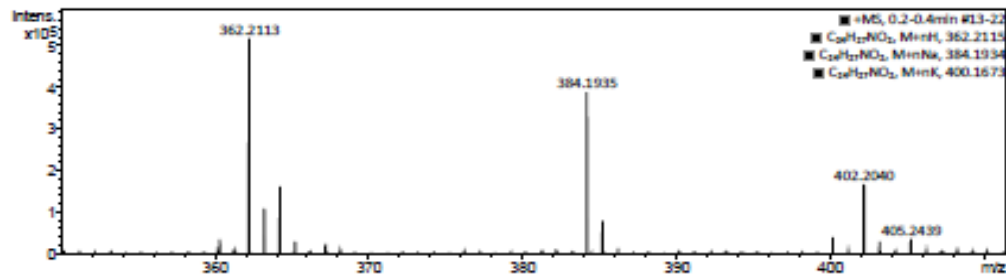

HRMS data of (+)-**8a**

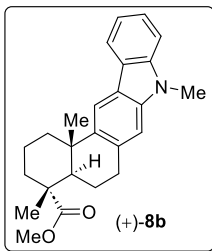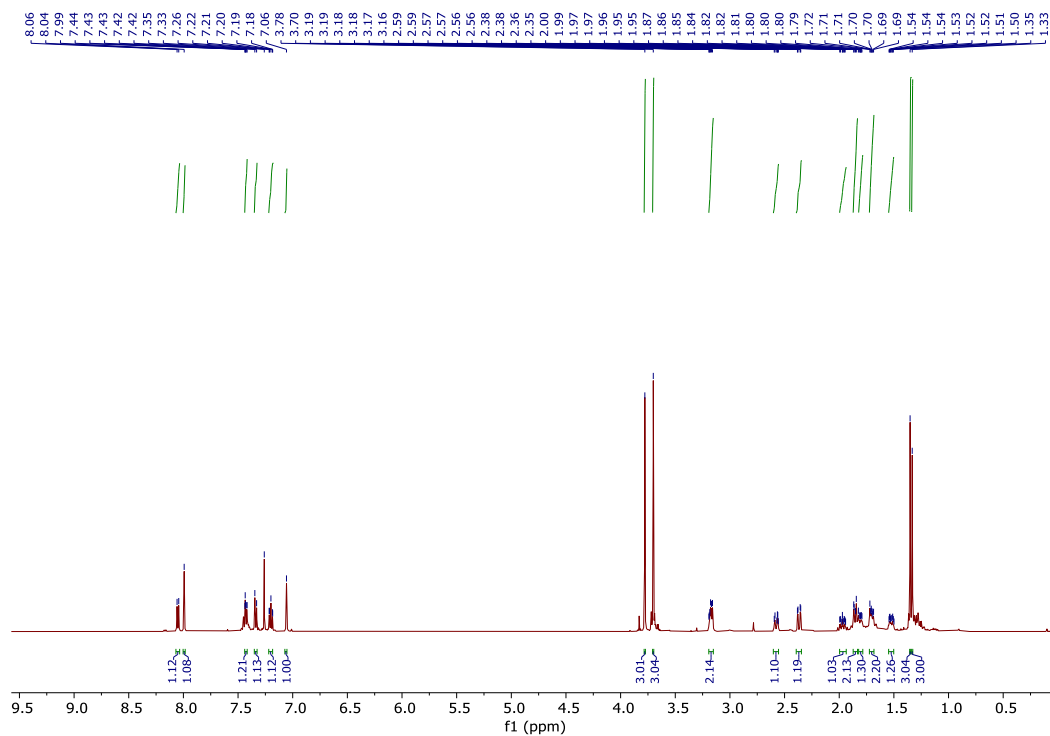

$^1\text{H}$  NMR (500 MHz,  $\text{CDCl}_3$ ) of (+)-8b

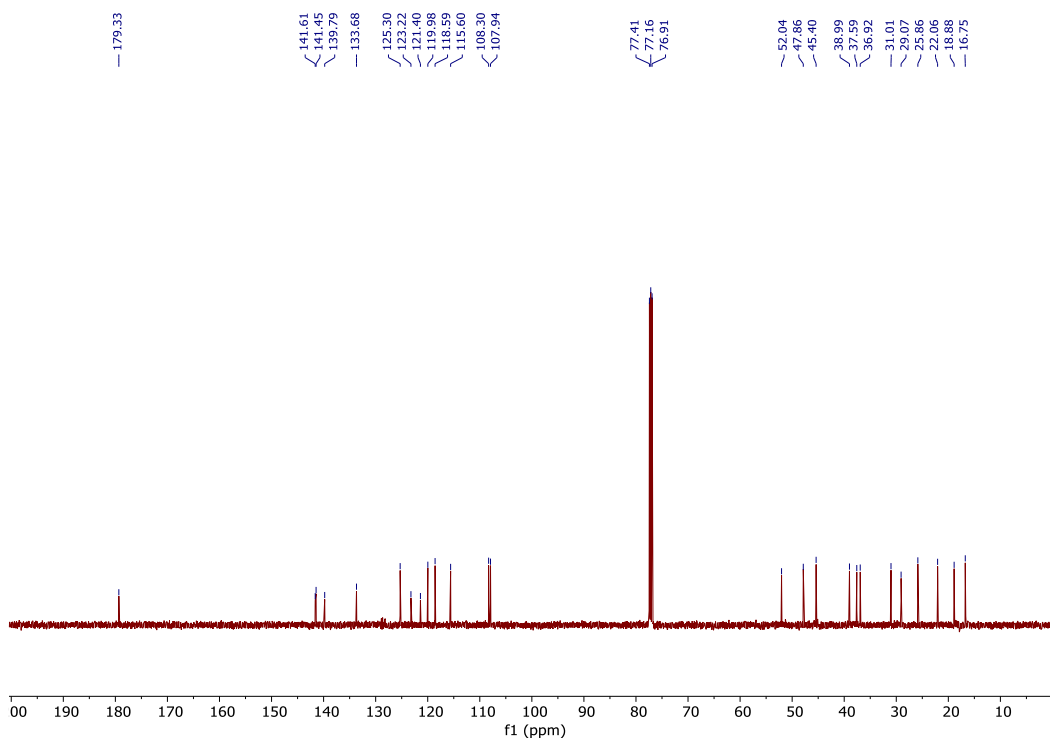

$^{13}\text{C}$  NMR (125 MHz,  $\text{CDCl}_3$ ) of (+)-8b

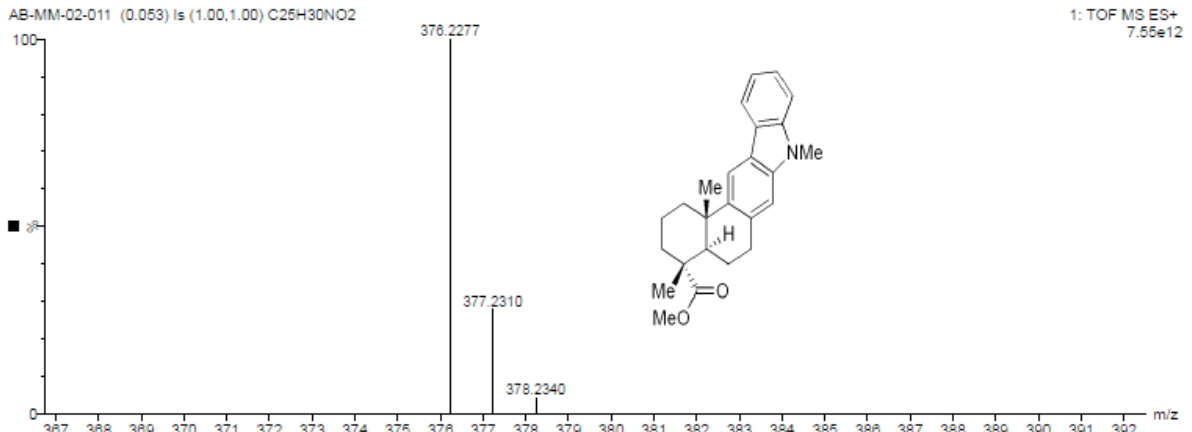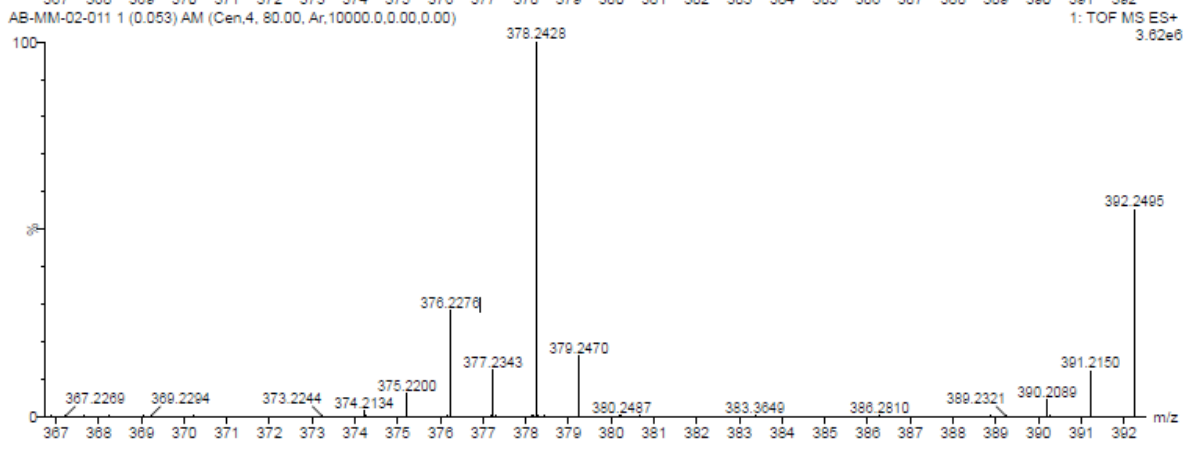

HRMS data of (+)-**8b**

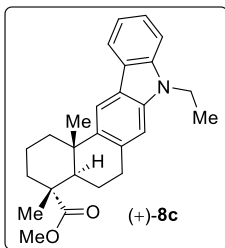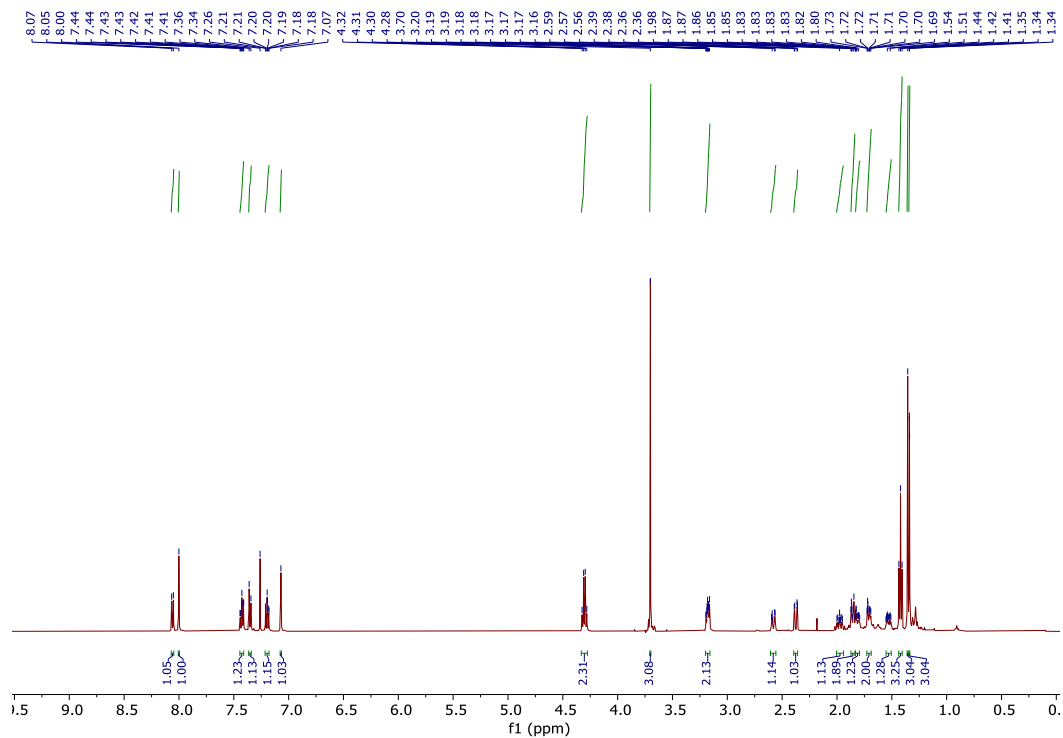

<sup>1</sup>H NMR (500 MHz, CDCl<sub>3</sub>) of (+)-8c

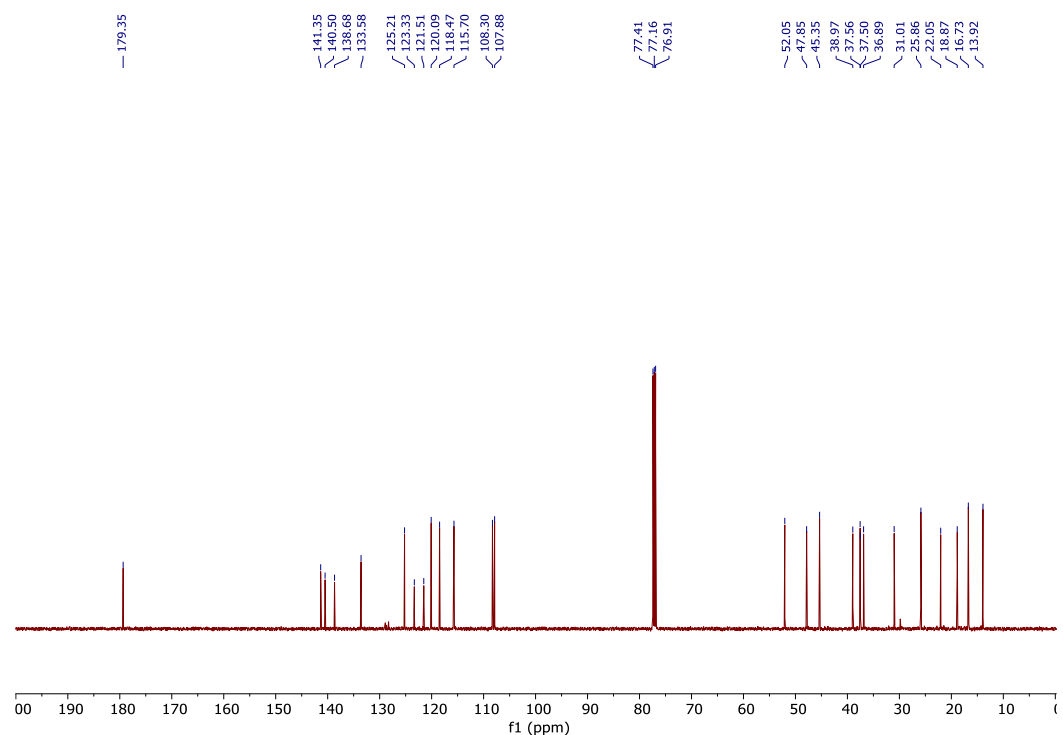

<sup>13</sup>C NMR (125 MHz, CDCl<sub>3</sub>) of (+)-8c

AB  
AB-MM-02-070 (2.912) Is (1.00,1.00) C<sub>28</sub>H<sub>32</sub>NO<sub>2</sub>

1: TOF MS ES+  
7.47e12

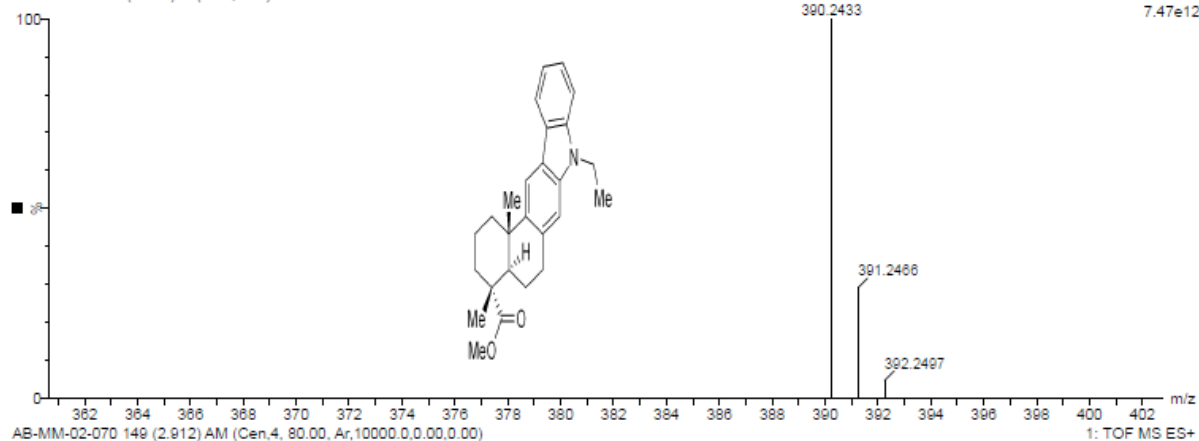

AB-MM-02-070 149 (2.912) AM (Cen.4, 80.00, Ar,10000.0,0.00,0.00)

1: TOF MS ES+  
2.60e6

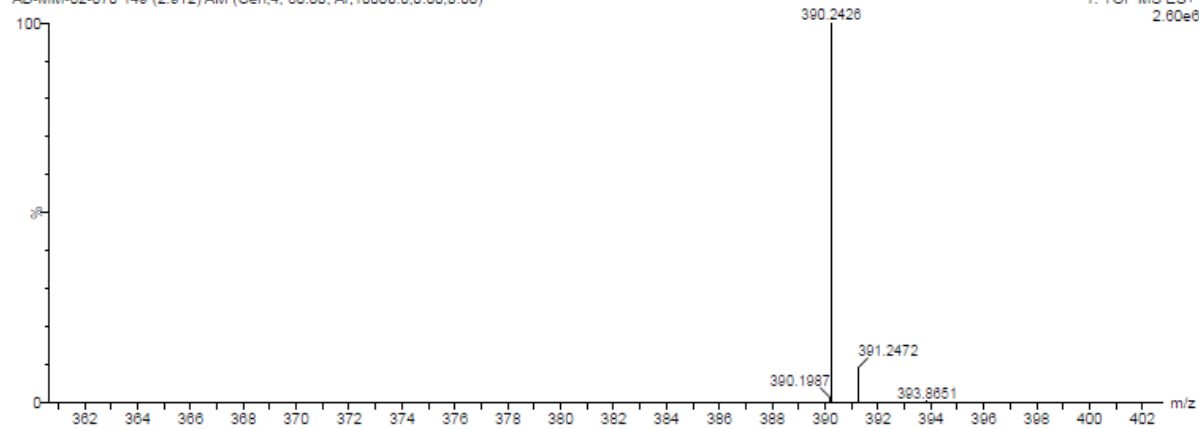

HRMS data of (+)-8c

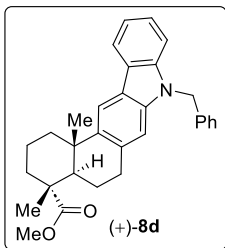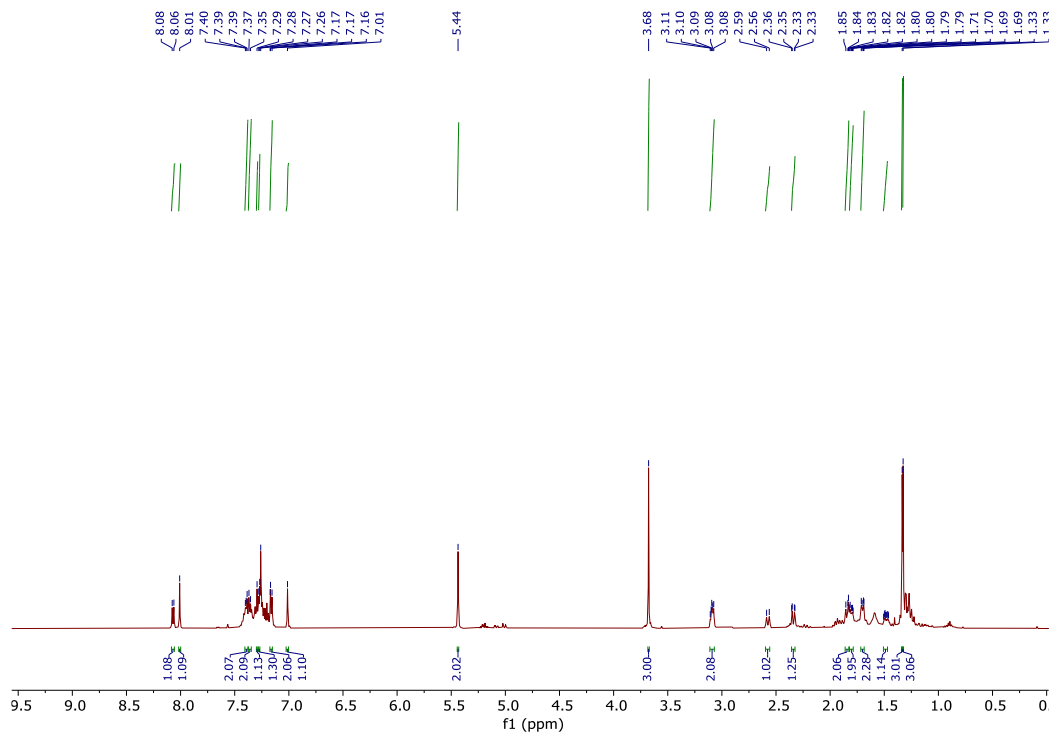

$^1\text{H NMR}$  (500 MHz,  $\text{CDCl}_3$ ) of (+)-8d

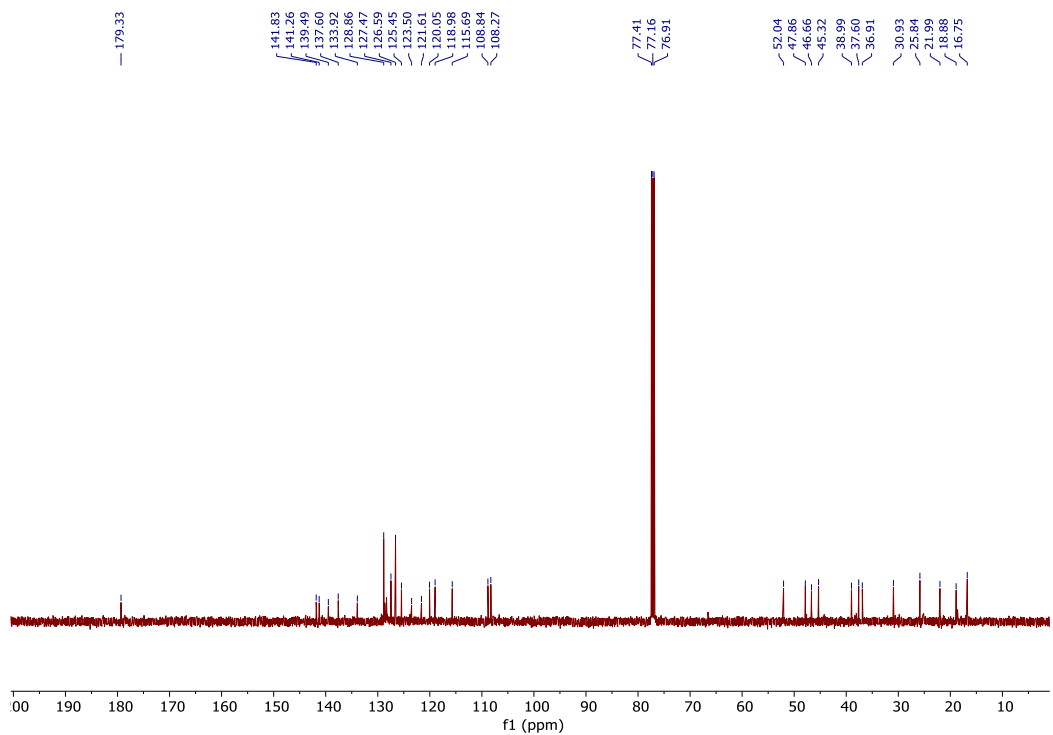

$^{13}\text{C NMR}$  (125 MHz,  $\text{CDCl}_3$ ) of (+)-8d

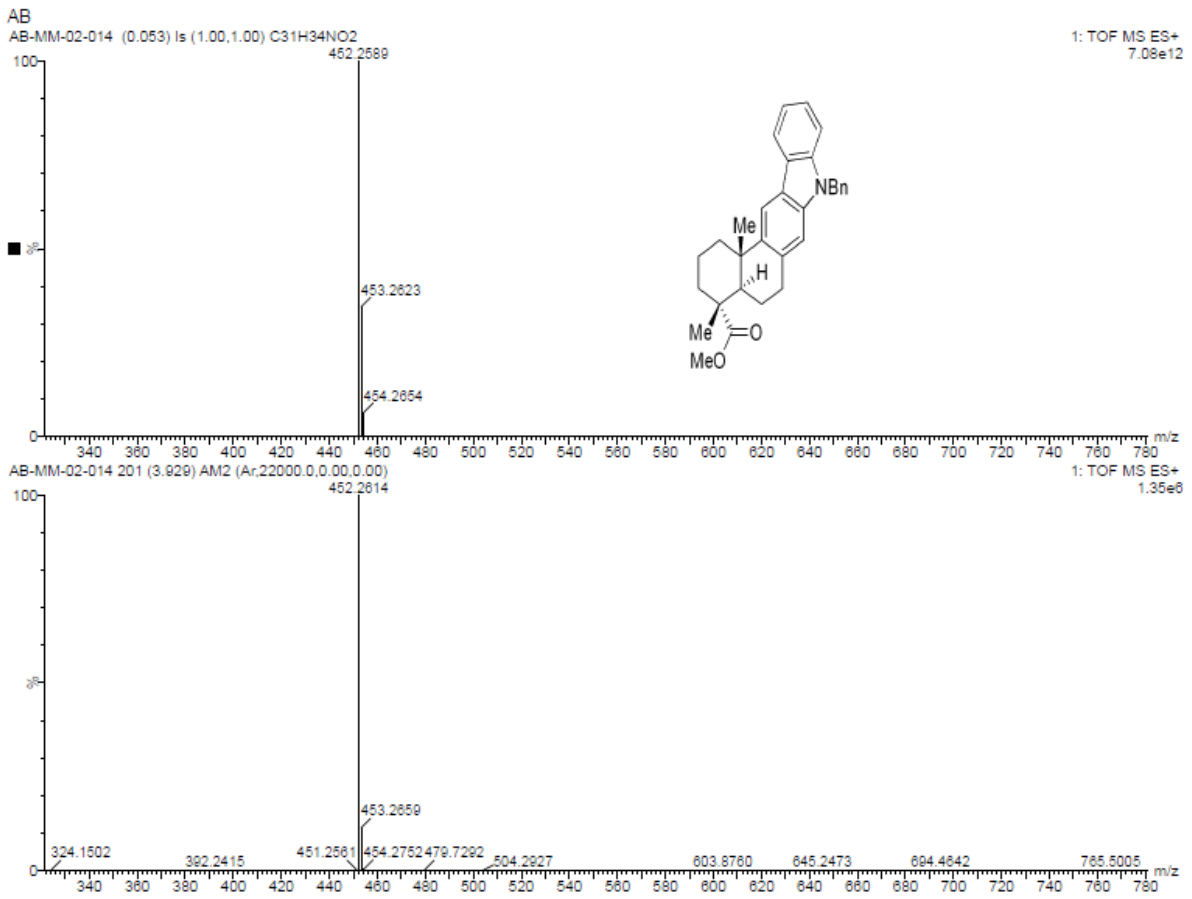

HRMS data of (+)-**8d**



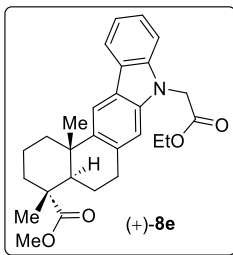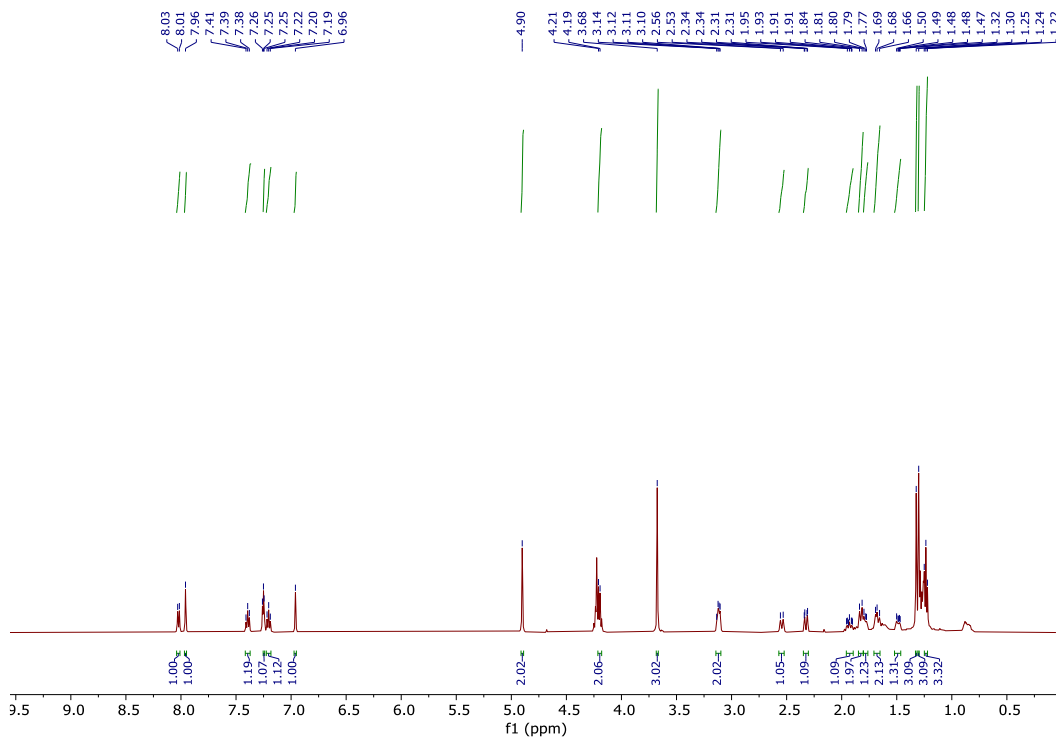

<sup>1</sup>H NMR (500 MHz, CDCl<sub>3</sub>) of (+)-**8e**

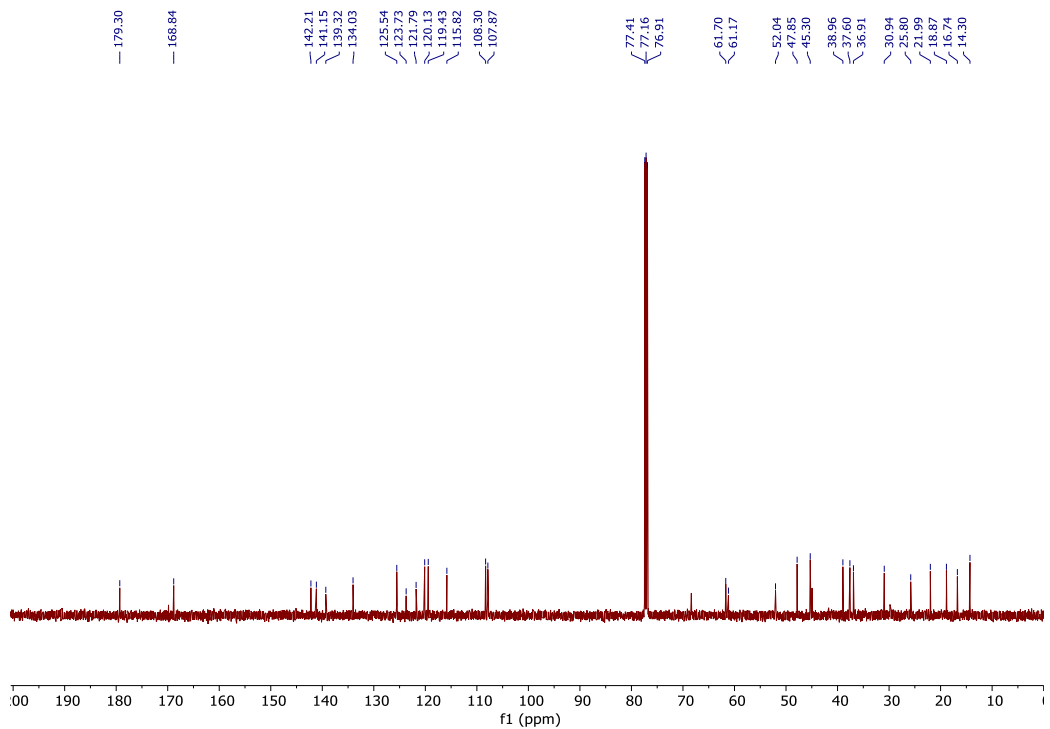

<sup>13</sup>C NMR (125 MHz, CDCl<sub>3</sub>) of (+)-**8e**

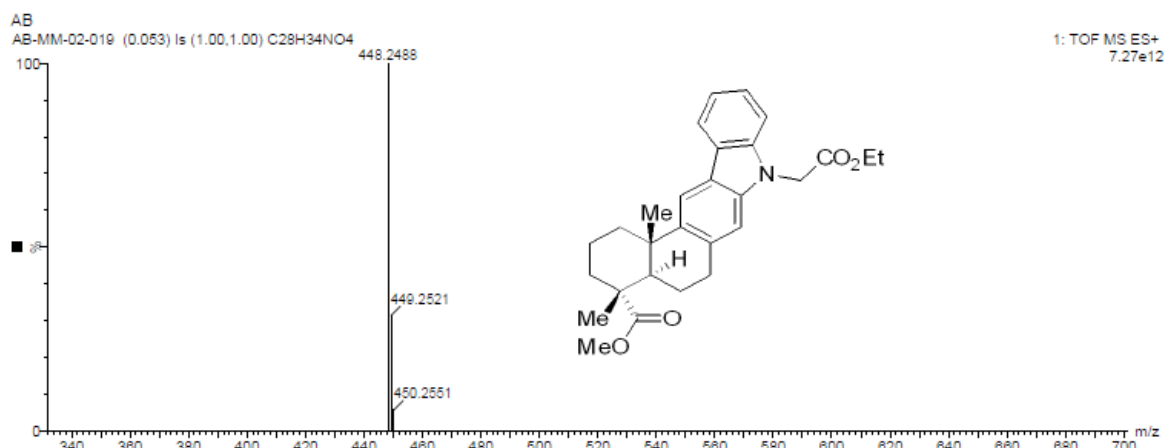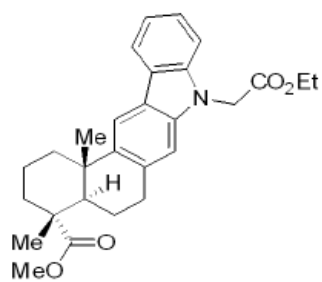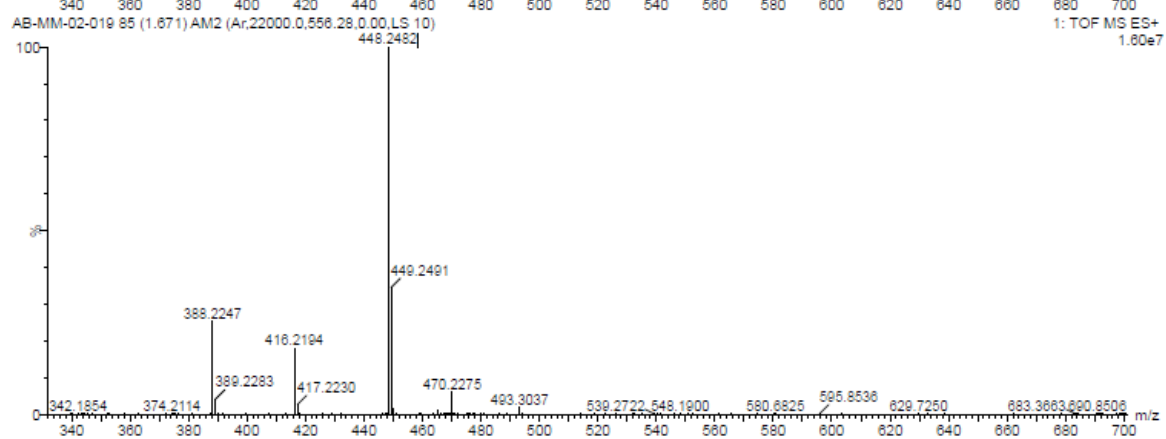

HRMS data of (+)-**8e**

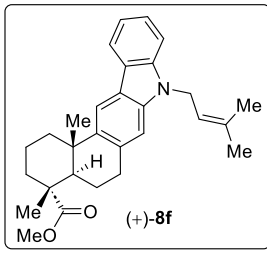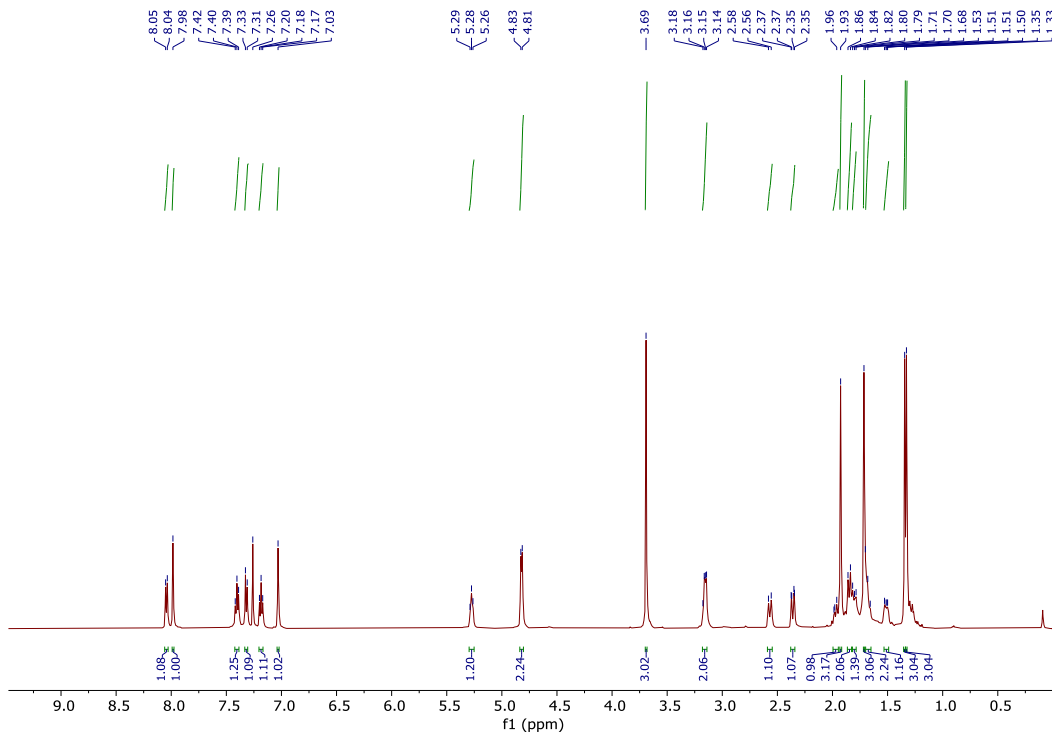

$^1\text{H}$  NMR (500 MHz,  $\text{CDCl}_3$ ) of (+)-8f

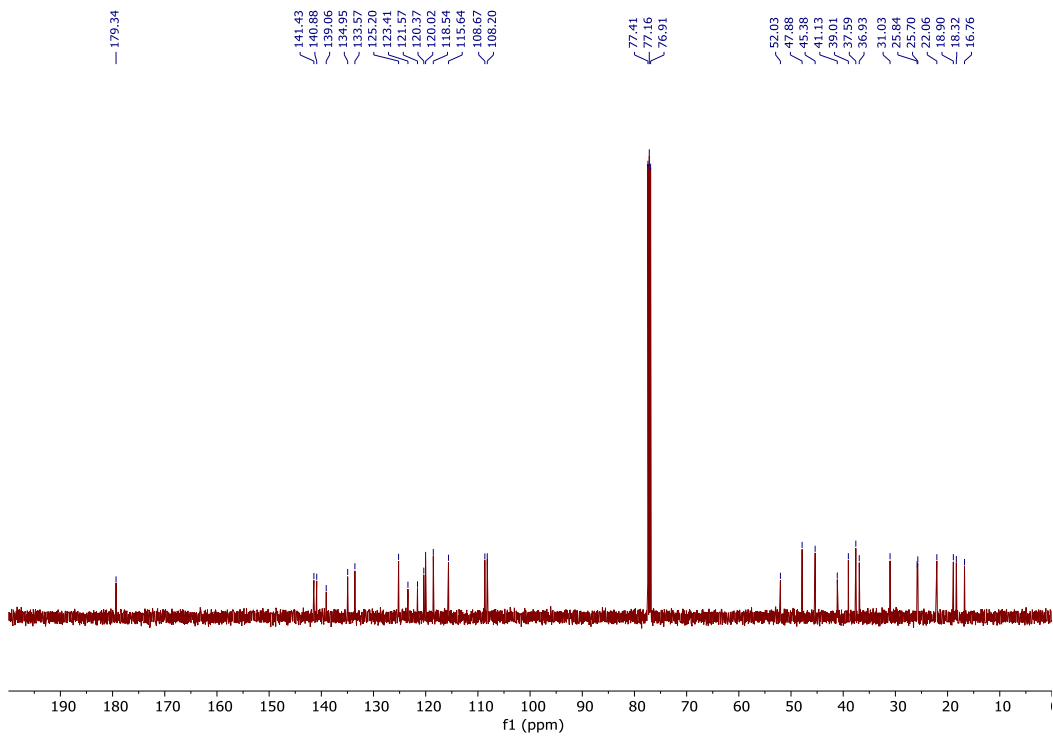

$^{13}\text{C}$  NMR (125 MHz,  $\text{CDCl}_3$ ) of (+)-8f

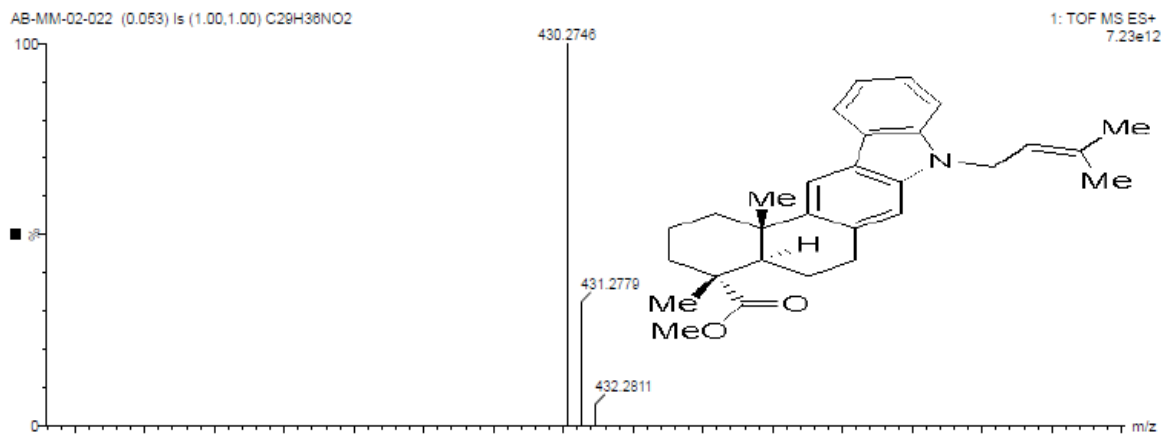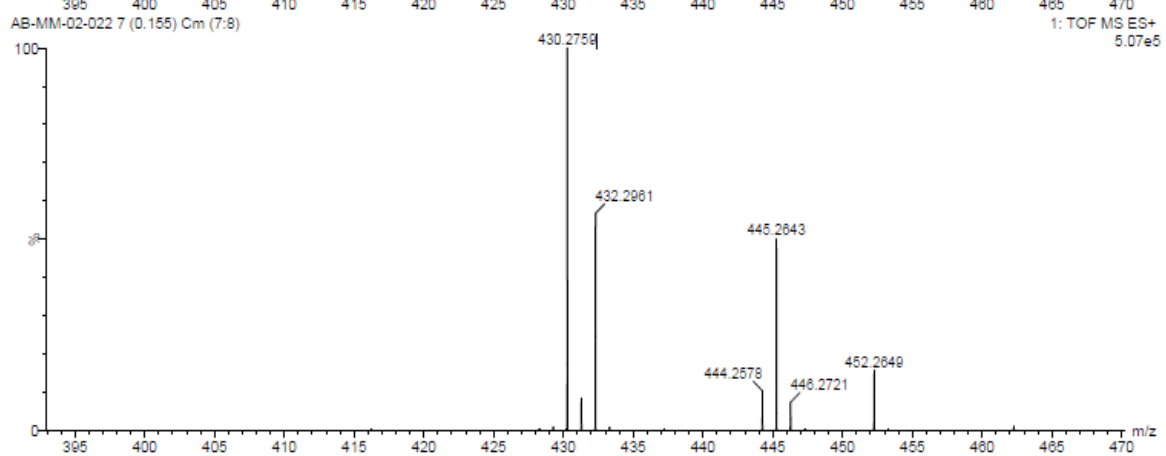

HRMS data of (+)-8f

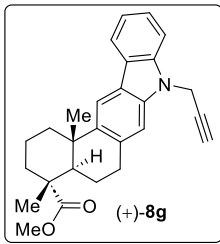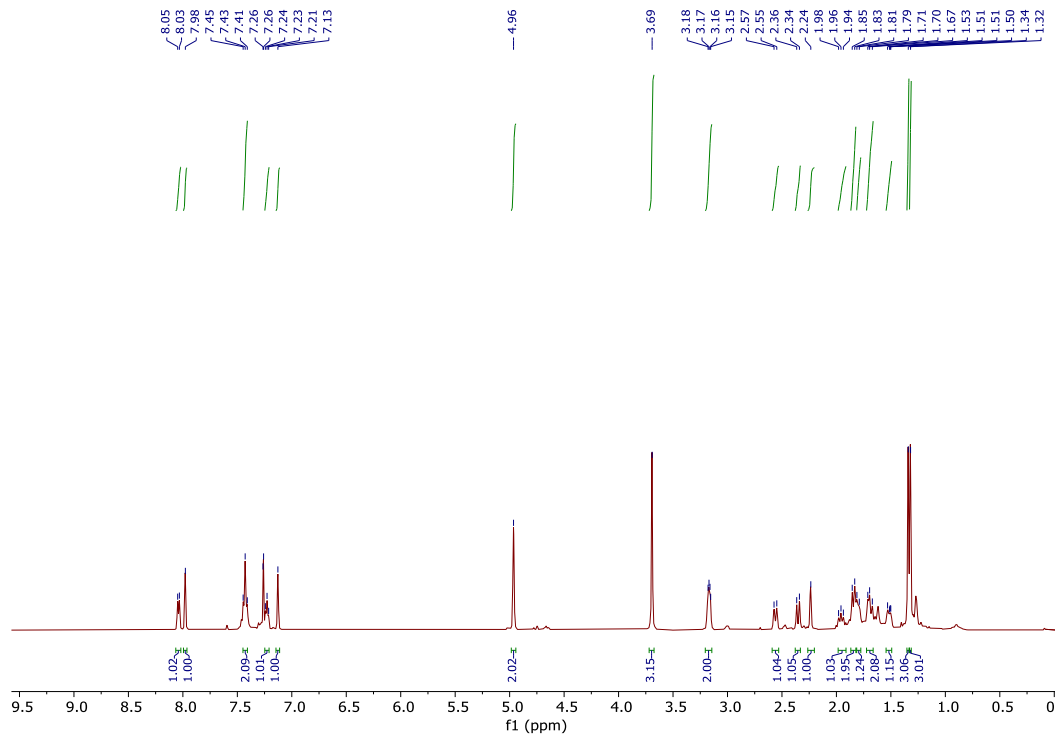

<sup>1</sup>H NMR (500 MHz, CDCl<sub>3</sub>) of (+)-**8g**

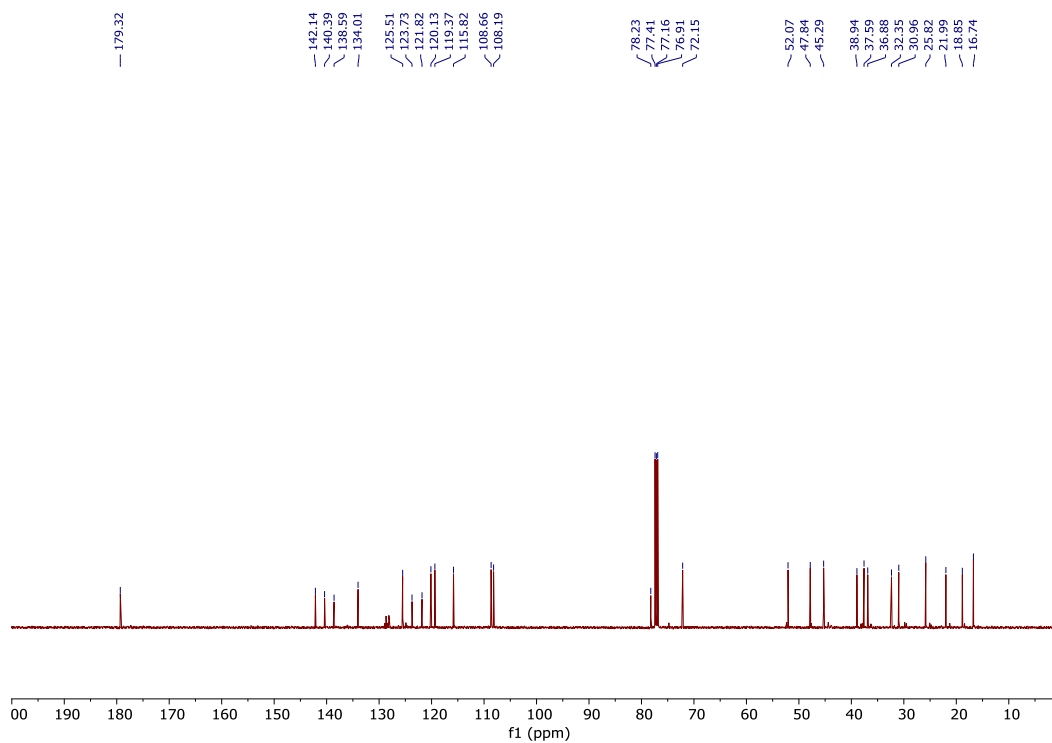

<sup>13</sup>C NMR (125 MHz, CDCl<sub>3</sub>) of (+)-**8g**

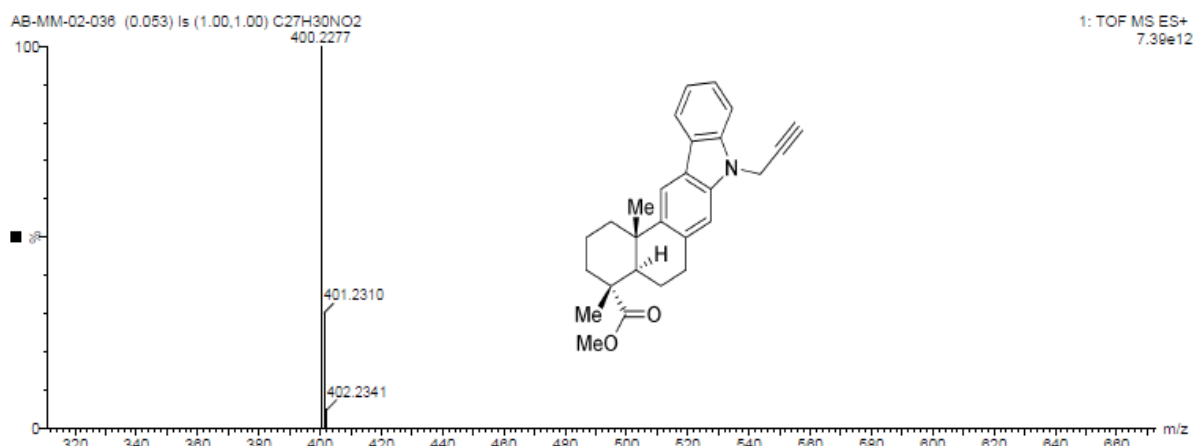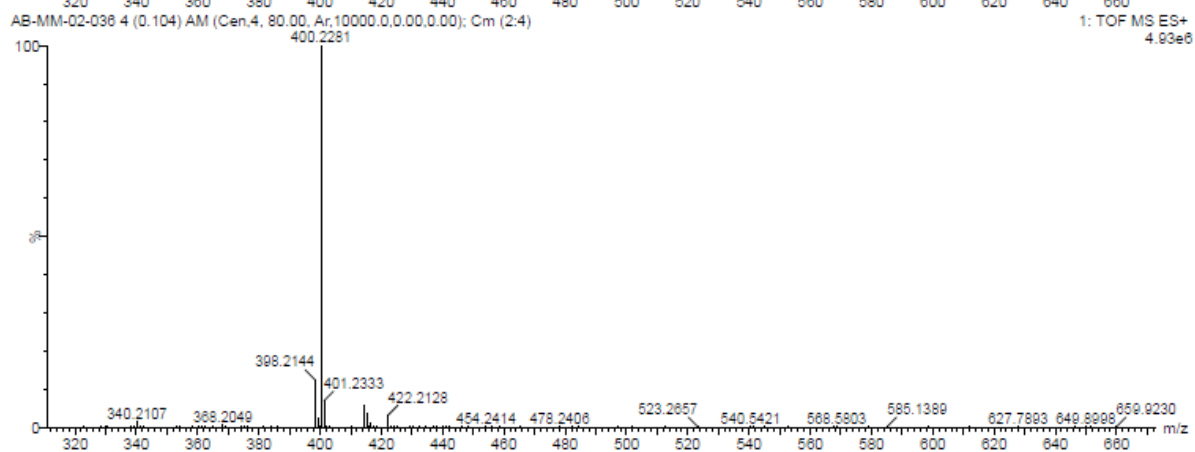

HRMS data of (+)-**8g**

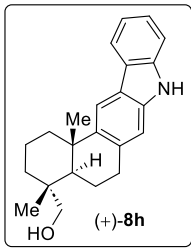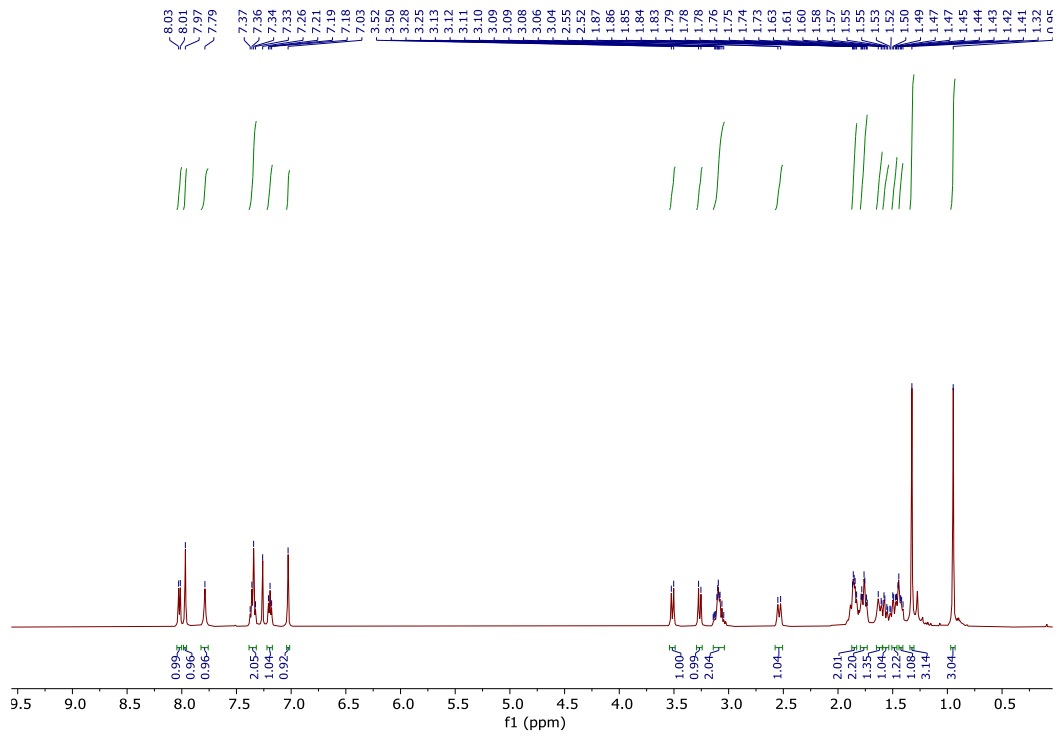

<sup>1</sup>H NMR (500 MHz, CDCl<sub>3</sub>) of (+)-8h

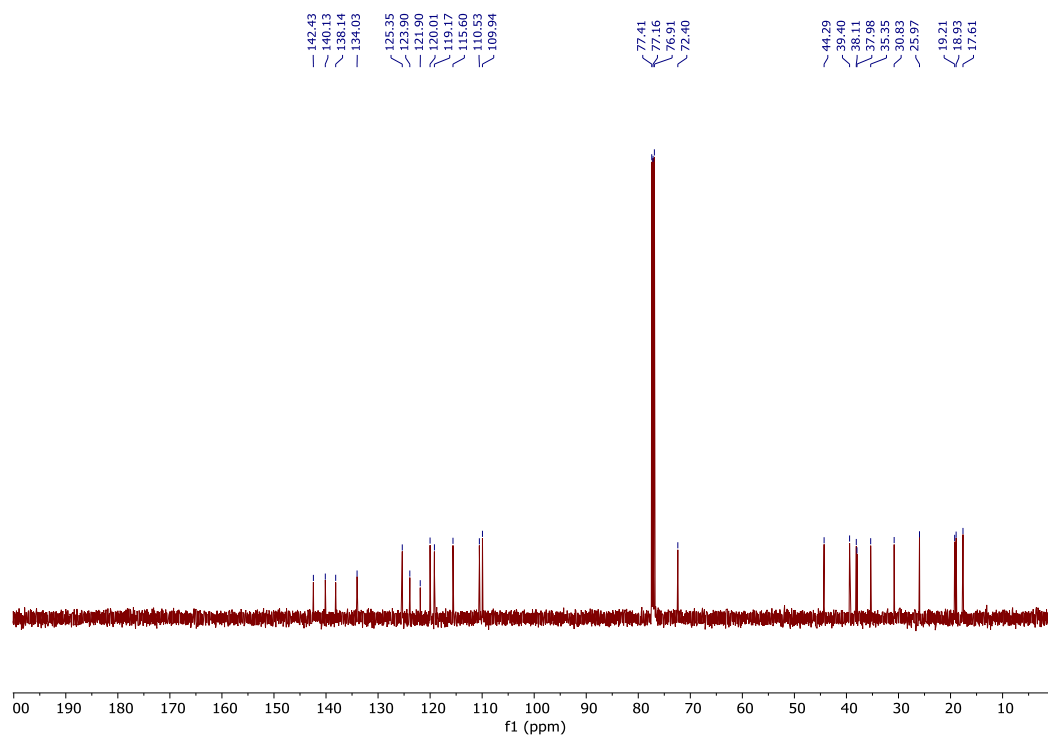

<sup>13</sup>C NMR (125 MHz, CDCl<sub>3</sub>) of (+)-8h

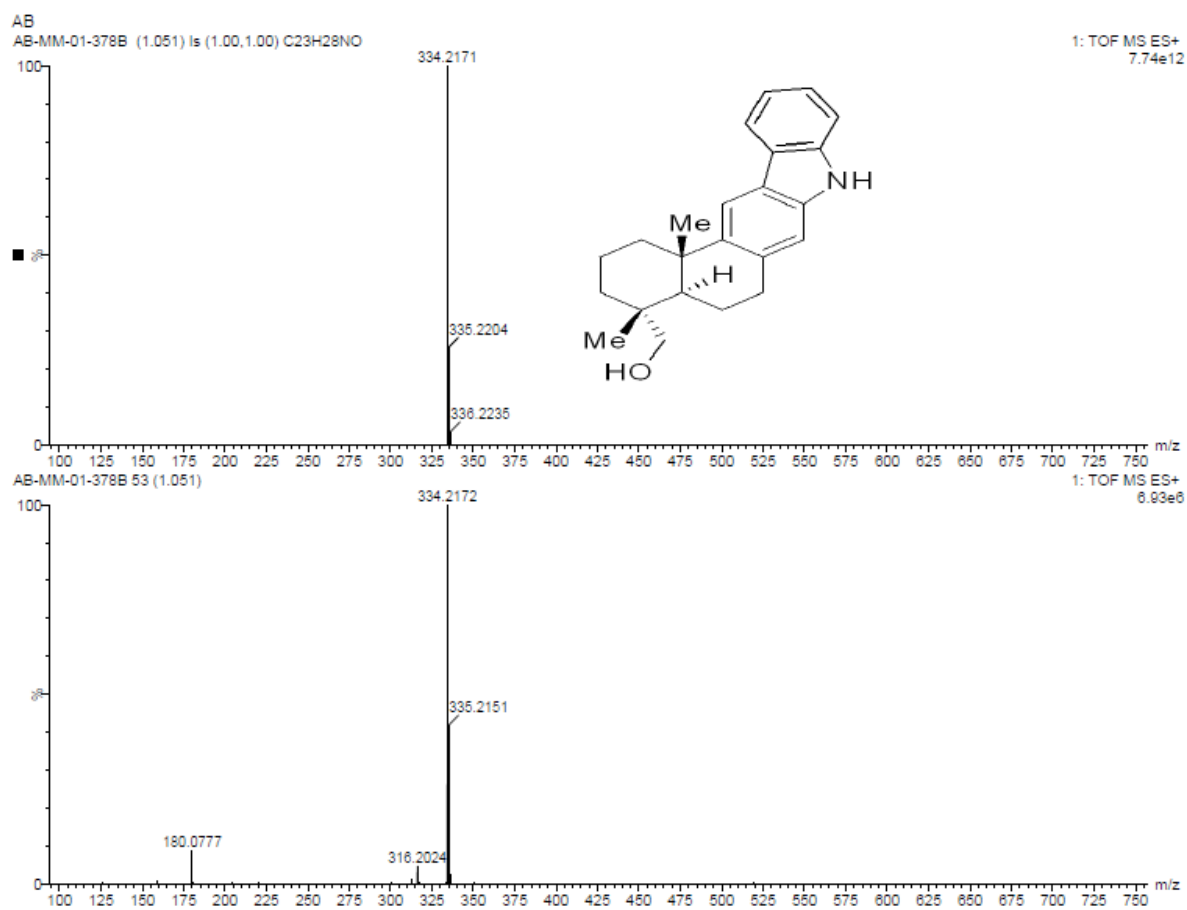

HRMS data of (+)-**8h**



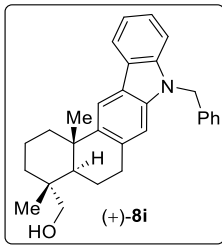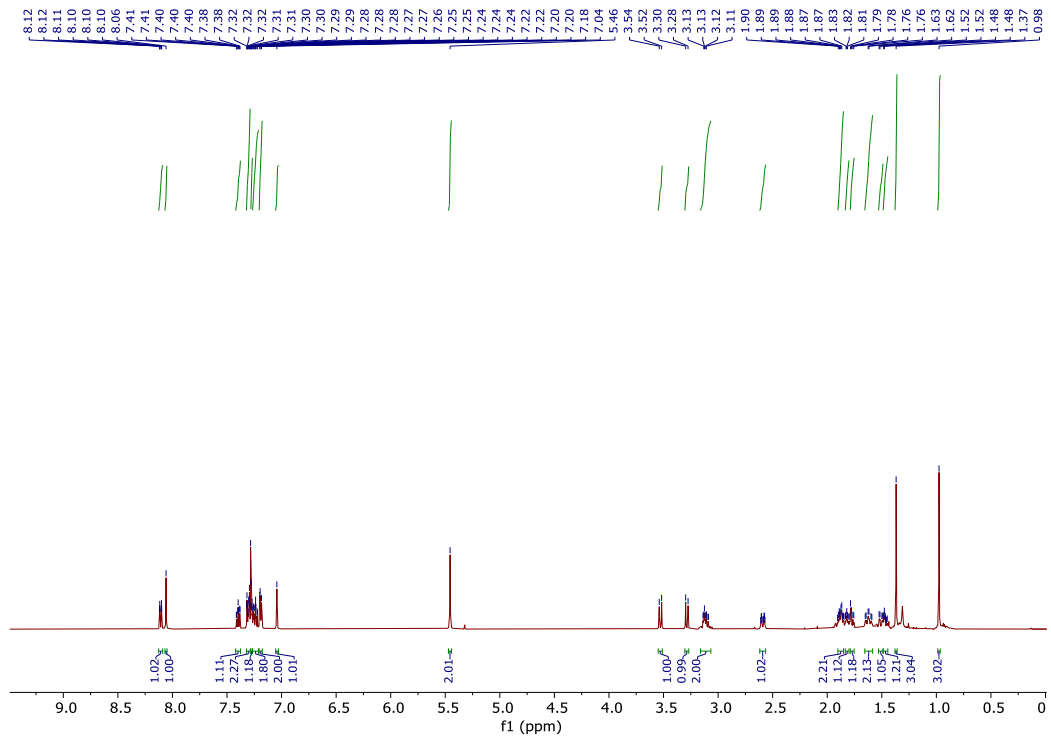

$^1\text{H NMR}$  (500 MHz,  $\text{CDCl}_3$ ) of (+)-**8i**

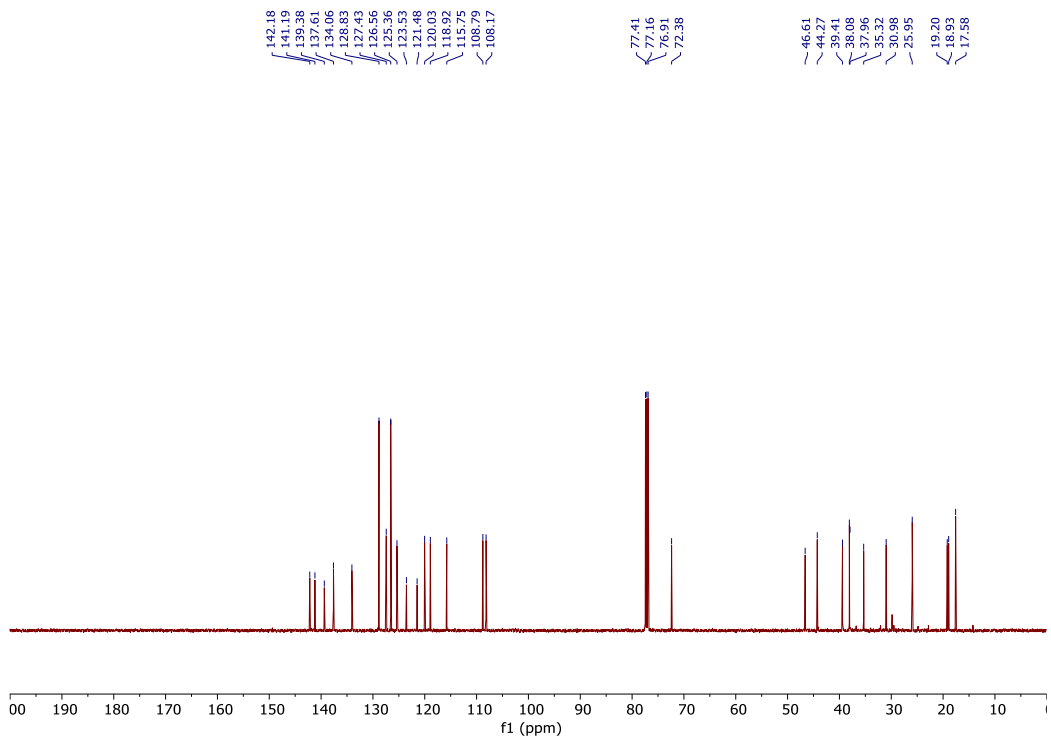

$^{13}\text{C NMR}$  (125 MHz,  $\text{CDCl}_3$ ) of (+)-**8i**

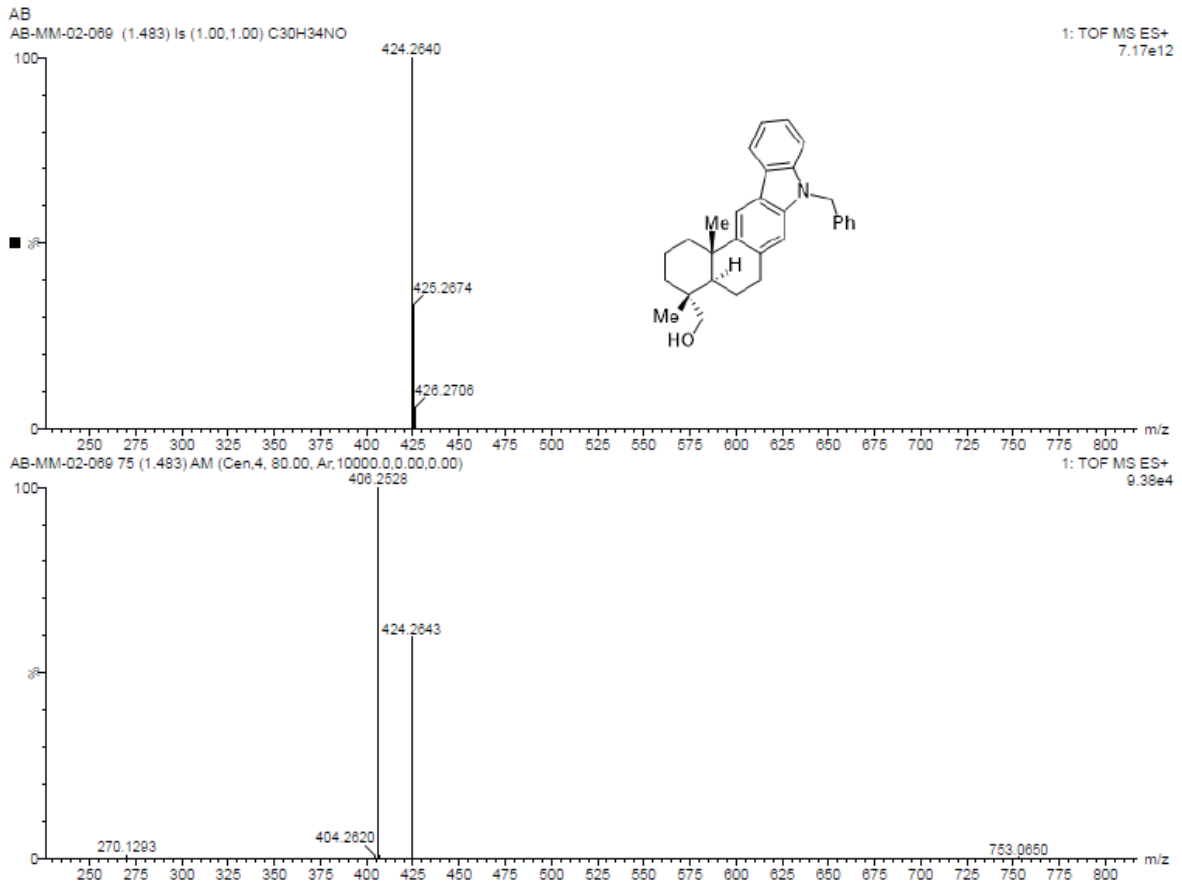

HRMS data of (+)-**8i**

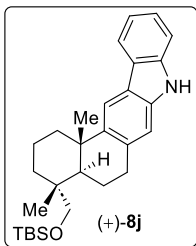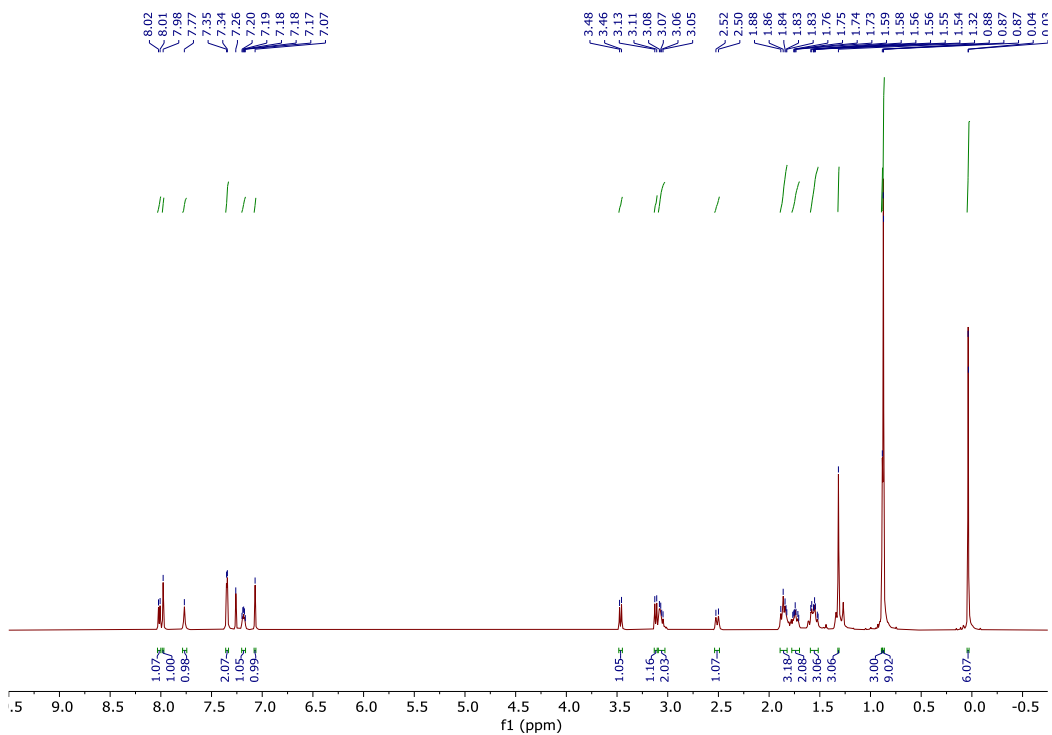

$^1\text{H NMR}$  (500 MHz,  $\text{CDCl}_3$ ) of (+)-**8j**

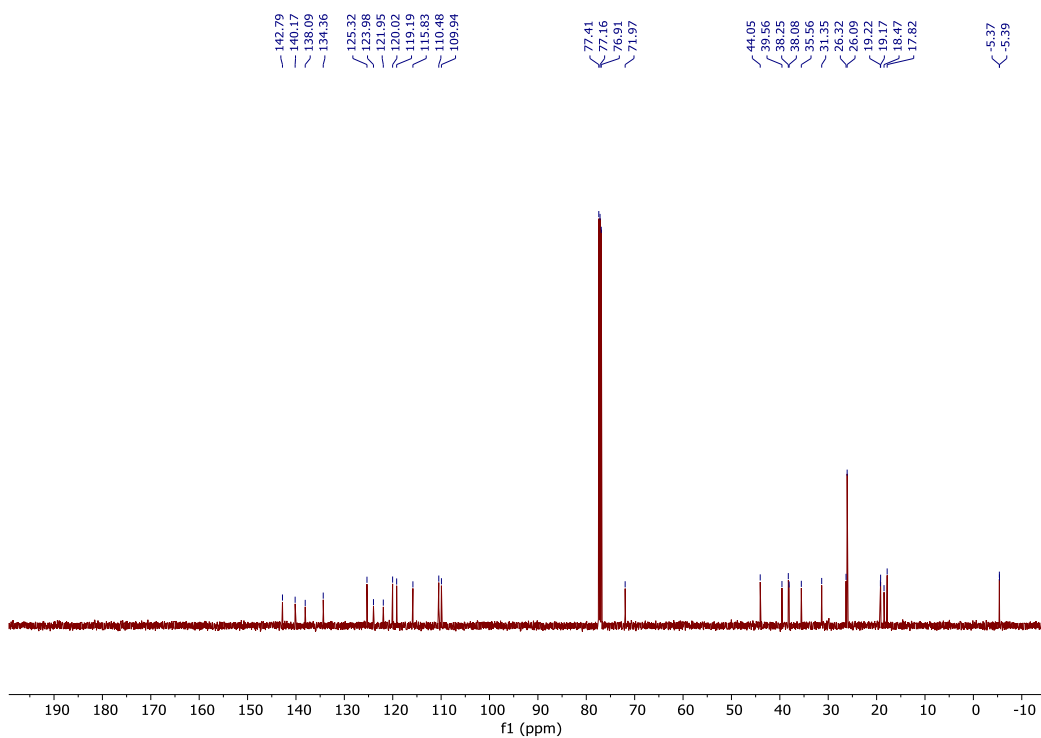

$^{13}\text{C NMR}$  (125 MHz,  $\text{CDCl}_3$ ) of (+)-**8j**

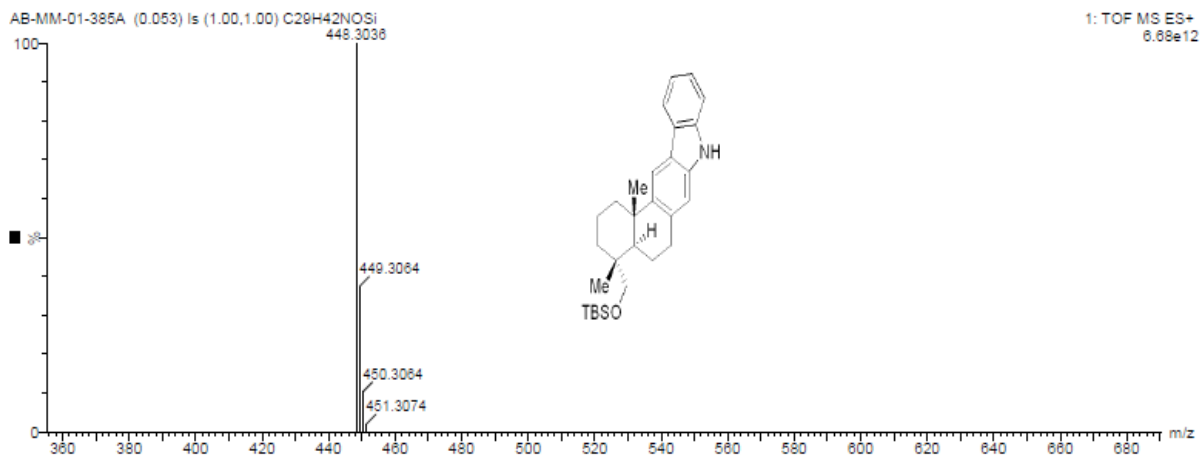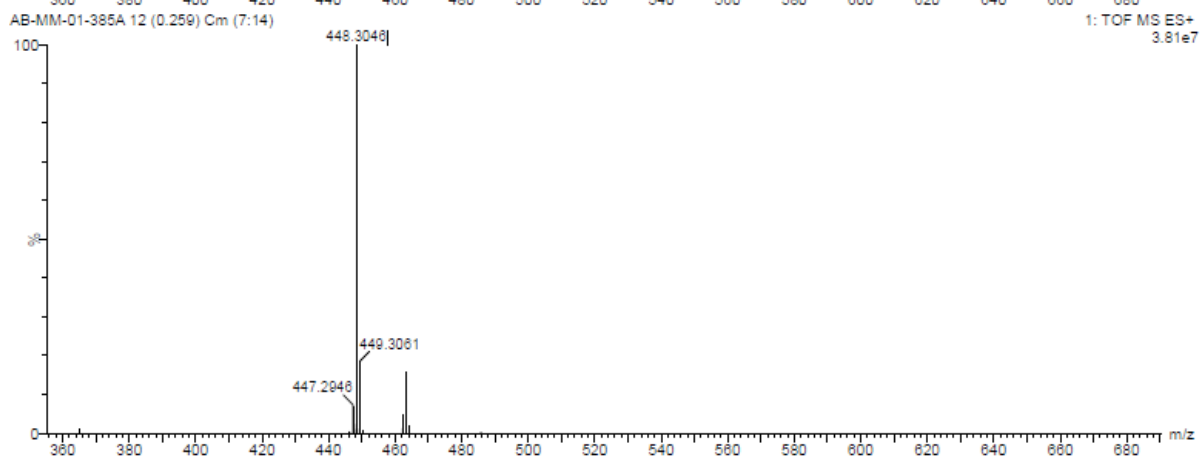

HRMS data of (+)-8j

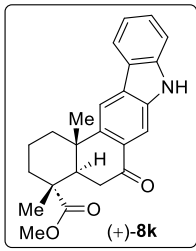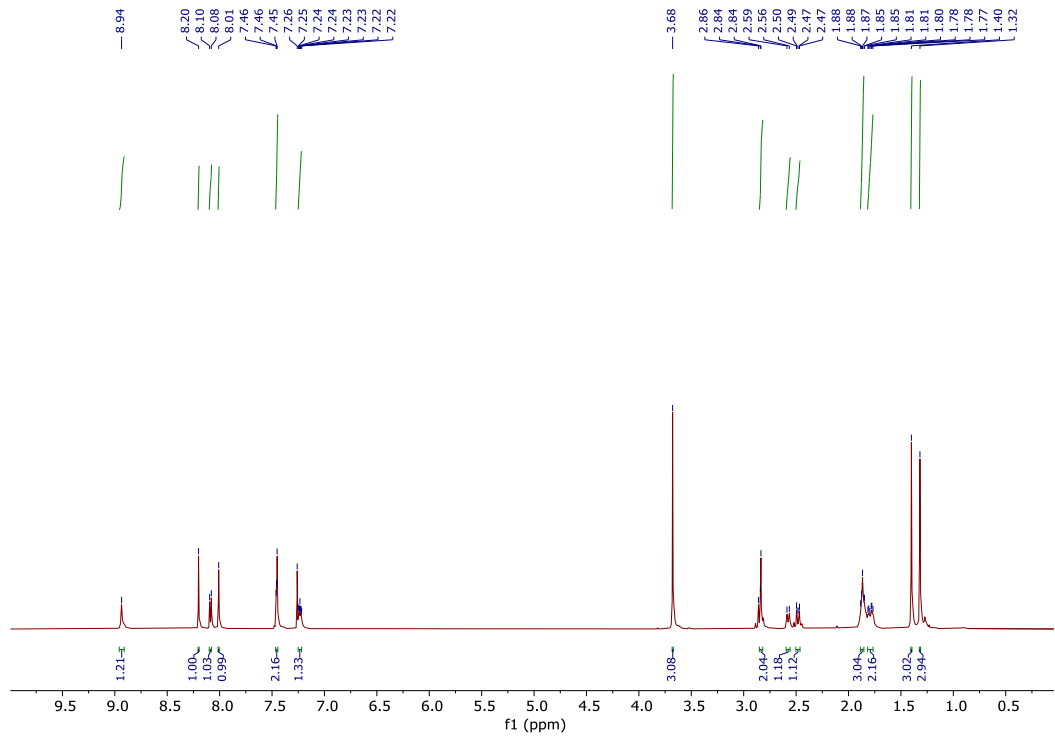

$^1\text{H NMR}$  (500 MHz,  $\text{CDCl}_3$ ) of (+)-8k

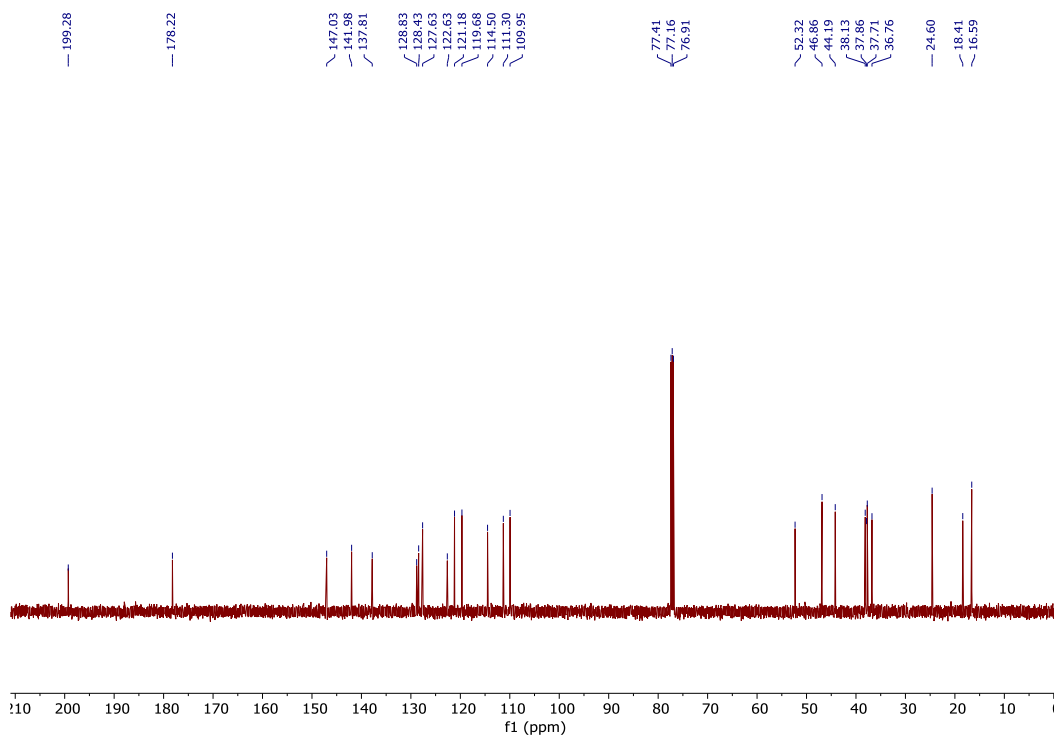

$^{13}\text{C NMR}$  (125 MHz,  $\text{CDCl}_3$ ) of (+)-8k

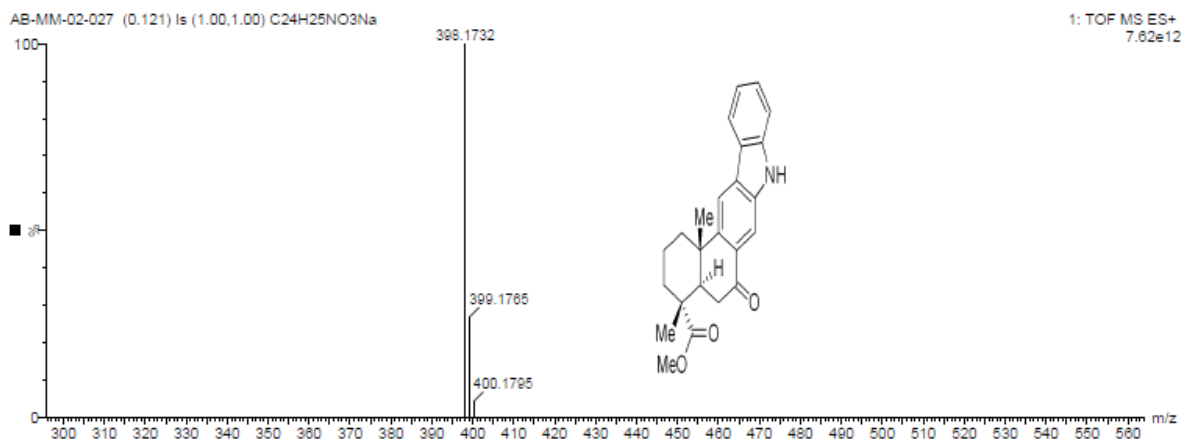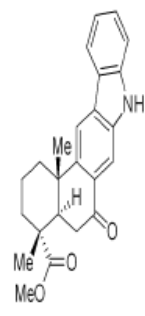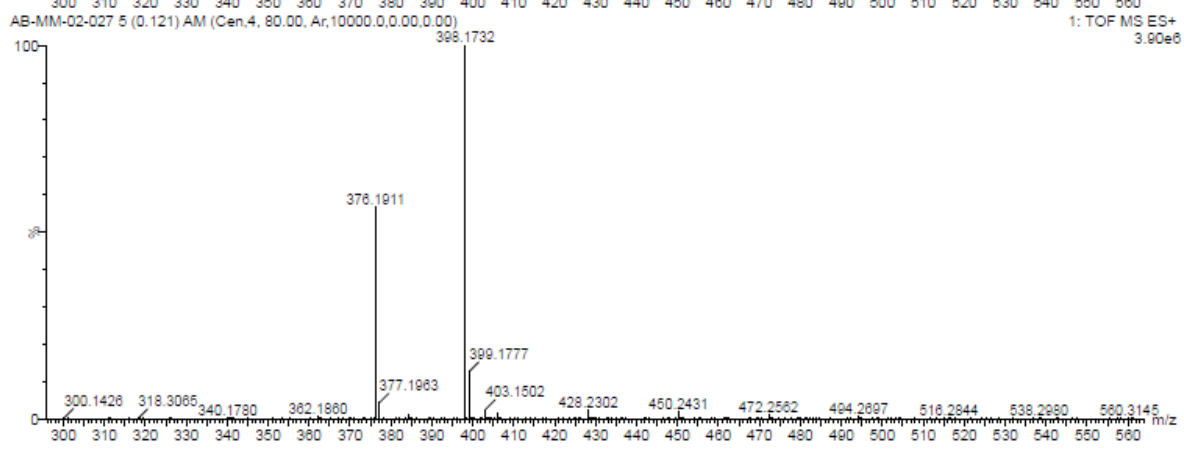

HRMS data of (+)-8k

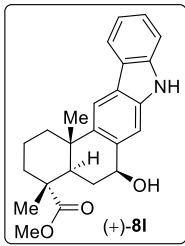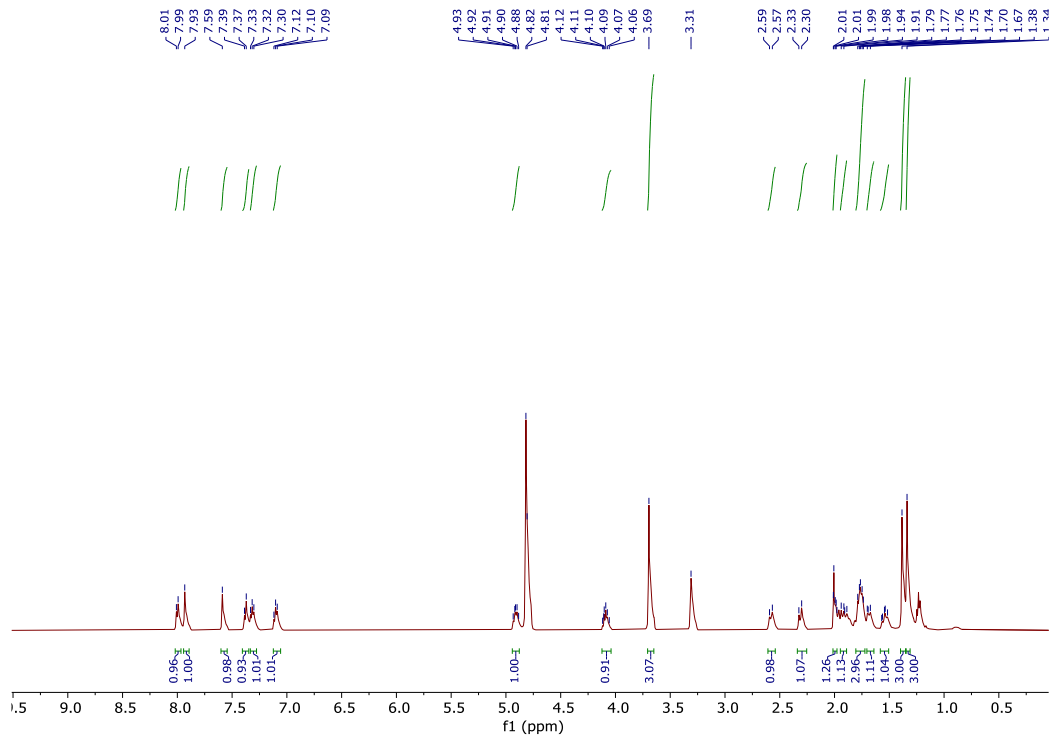

<sup>1</sup>H NMR (500 MHz, CD<sub>3</sub>OD) of (+)-8I

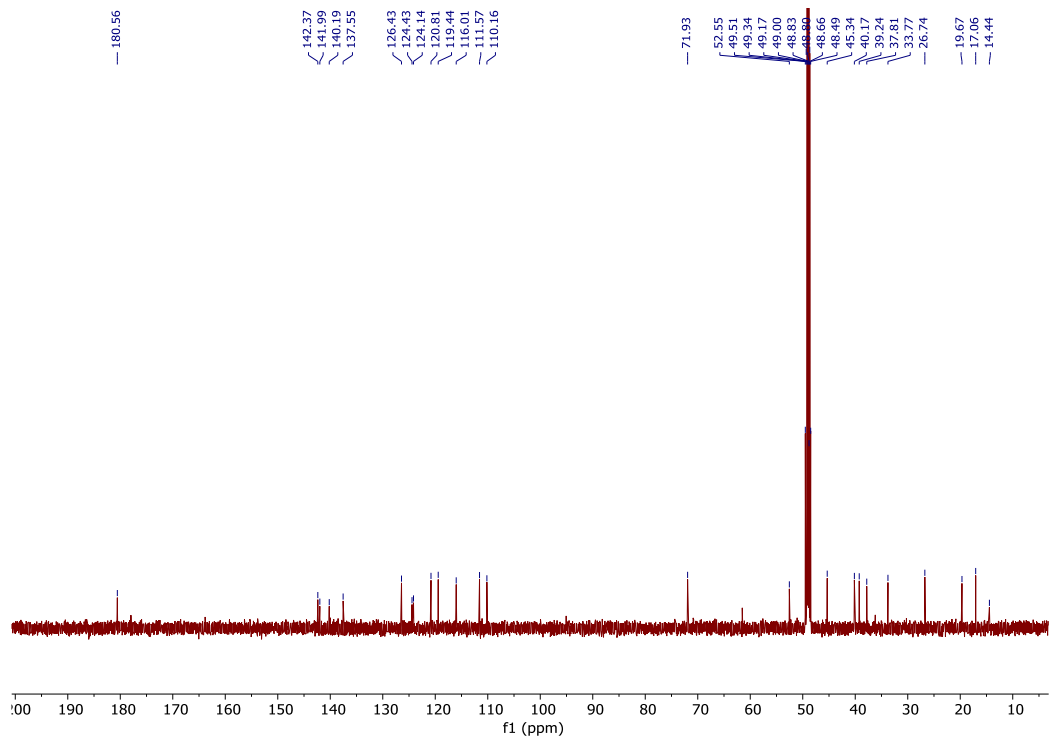

<sup>13</sup>C NMR (125 MHz, CD<sub>3</sub>OD) of (+)-8I

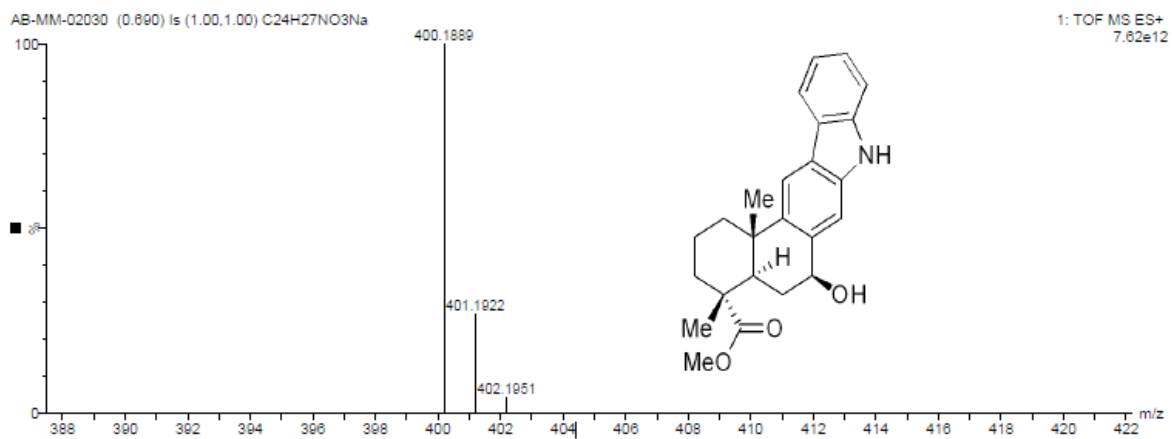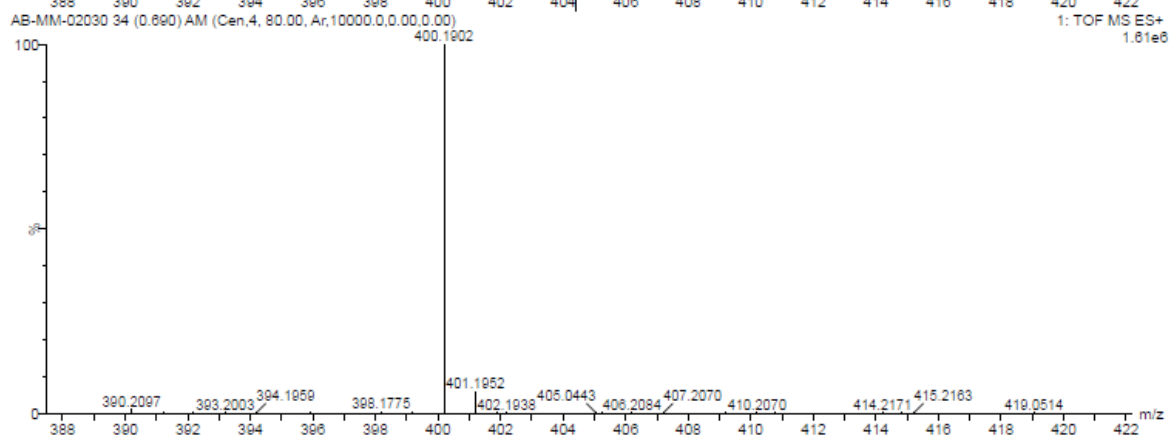

HRMS data of (+)-**81**



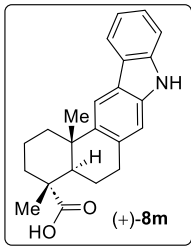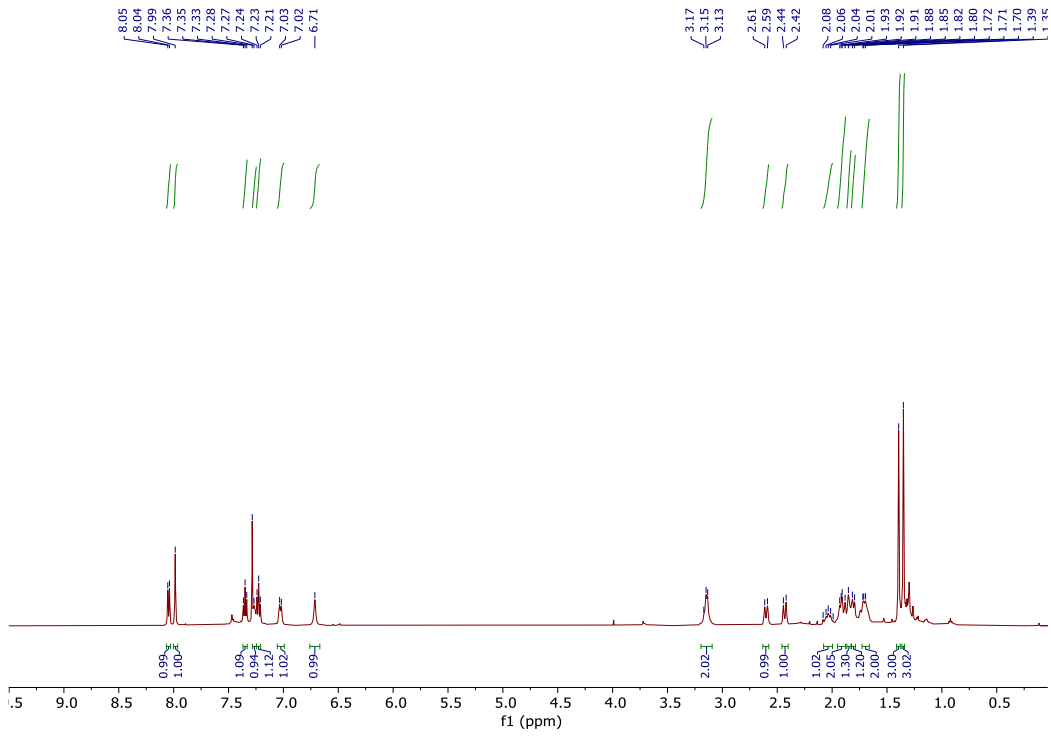

<sup>1</sup>H NMR (500 MHz, CDCl<sub>3</sub>) of (+)-8m

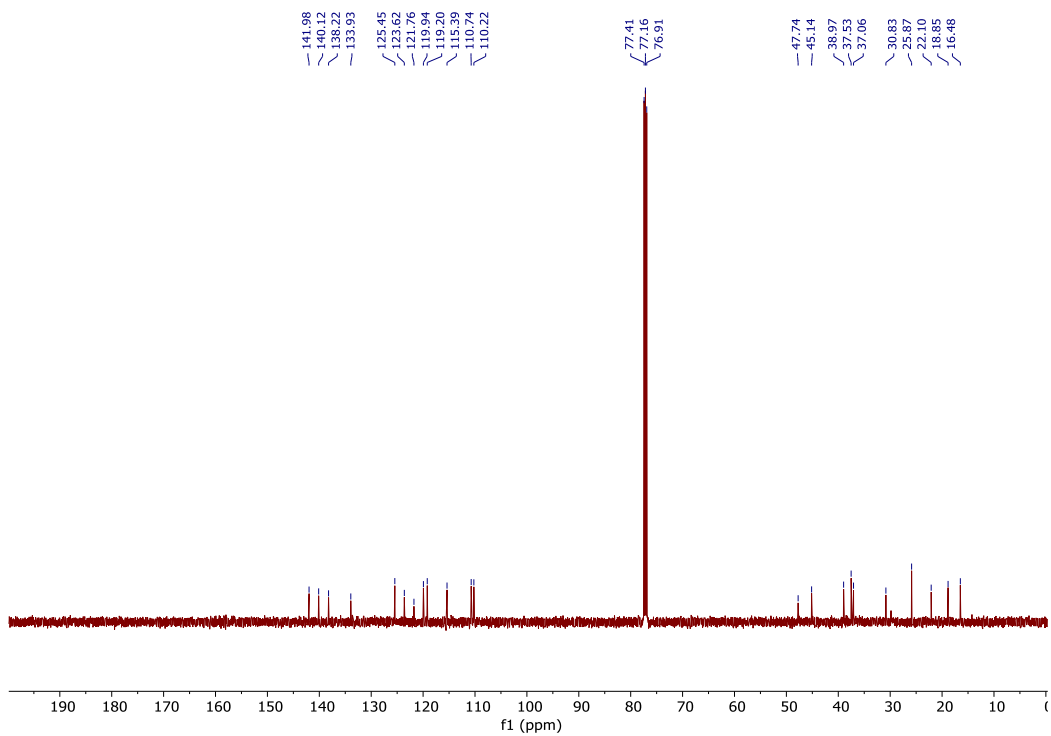

<sup>13</sup>C NMR (125 MHz, CDCl<sub>3</sub>) of (+)-8m

AB  
AB-MM-01-0383 (0.053) Is (1.00,1.00) C<sub>23</sub>H<sub>28</sub>NO<sub>2</sub>

1: TOF MS ES+  
7.72e12

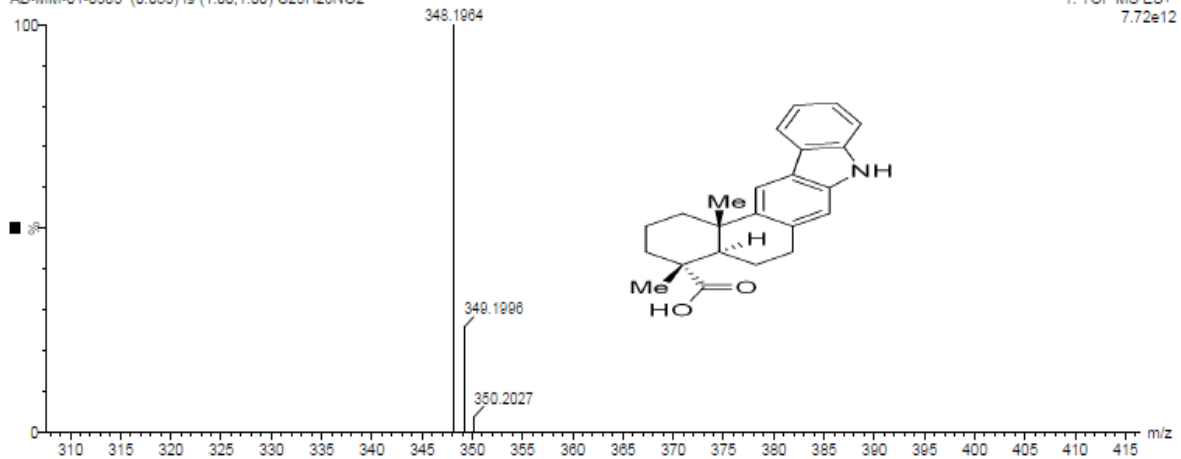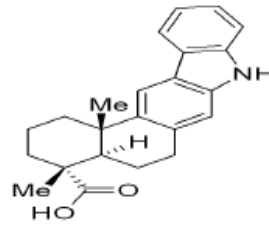

AB-MM-01-0383 41 (0.829) AM2 (Ar,22000,0.656,28,0.00,LS 10)

1: TOF MS ES+  
7.31e8

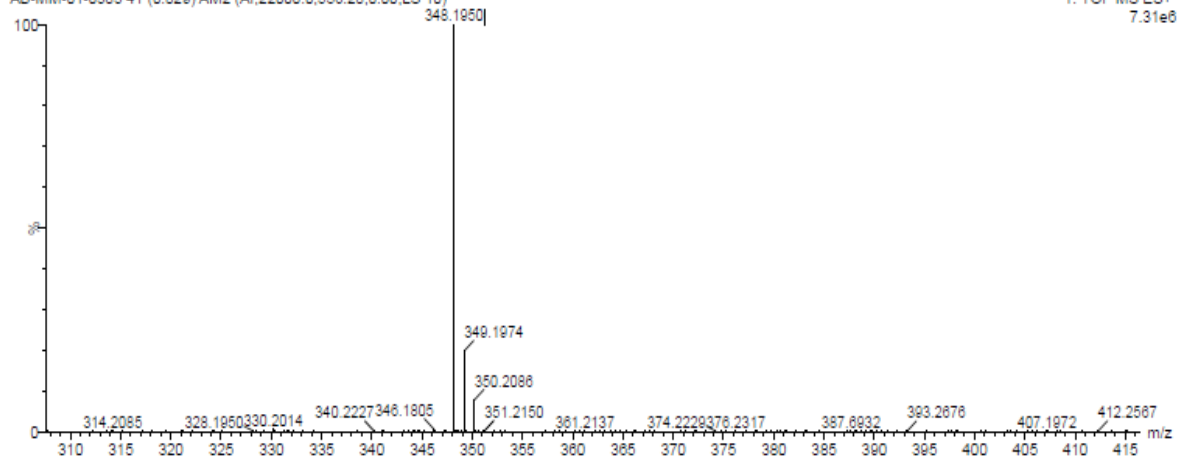

HRMS data of (+)-8m

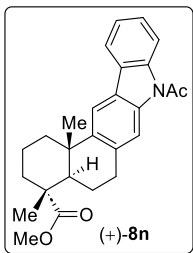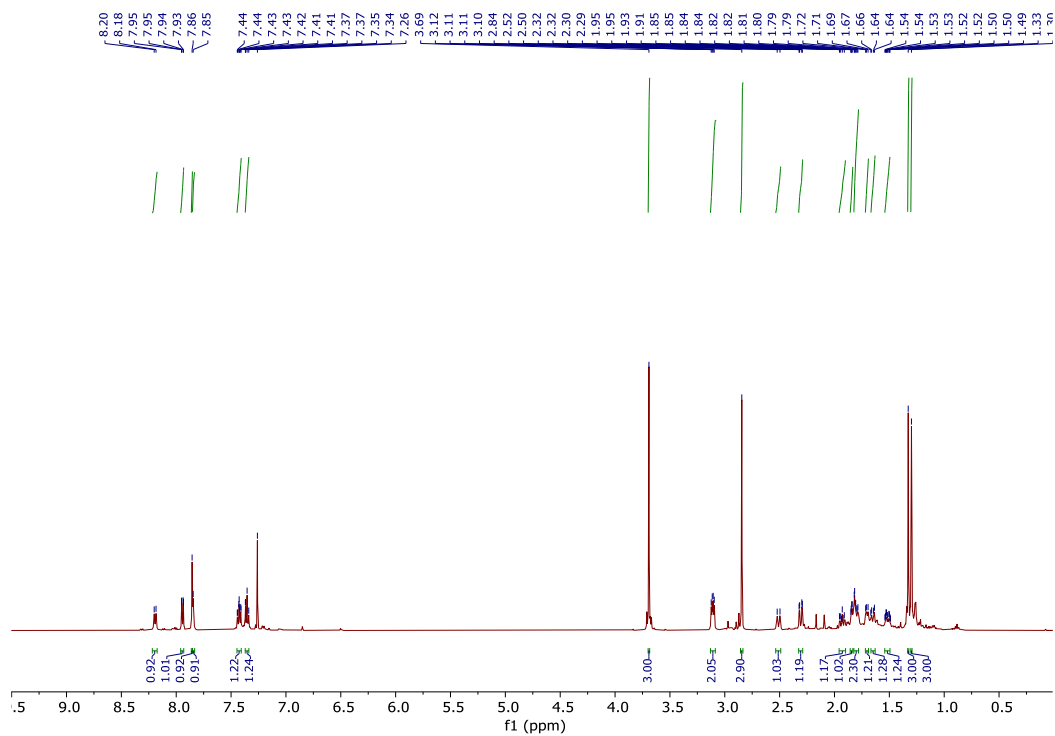

$^1\text{H NMR}$  (500 MHz,  $\text{CDCl}_3$ ) of (+)-8n

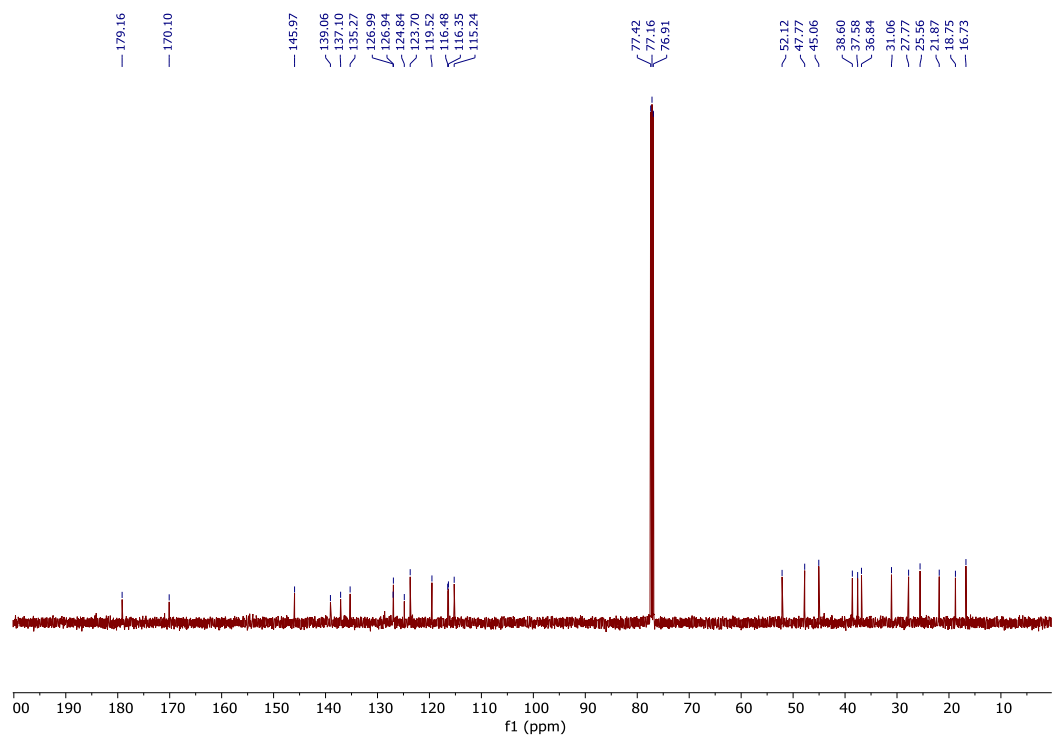

$^{13}\text{C NMR}$  (125 MHz,  $\text{CDCl}_3$ ) of (+)-8n

## Display Report

**Analysis Info**

Analysis Name D:\Data\User data\2021\MARCH\AB\_MM\_01\_123.d  
 Method Tune\_pos\_Mid.m  
 Sample Name AB\_MM\_01\_123  
 Comment

Acquisition Date 3/8/2021 12:46:50 PM

Operator IISER Kolkata  
 Instrument maXis Impact 8282001.00127

**Acquisition Parameter**

|             |          |                      |          |                  |           |
|-------------|----------|----------------------|----------|------------------|-----------|
| Source Type | ESI      | Ion Polarity         | Positive | Set Nebulizer    | 0.4 Bar   |
| Focus       | Active   | Set Capillary        | 3400 V   | Set Dry Heater   | 200 °C    |
| Scan Begin  | 50 m/z   | Set End Plate Offset | -500 V   | Set Dry Gas      | 4.0 l/min |
| Scan End    | 3000 m/z | Set Charging Voltage | 2000 V   | Set Divert Valve | Source    |
|             |          | Set Corona           | 0 nA     | Set APCI Heater  | 0 °C      |

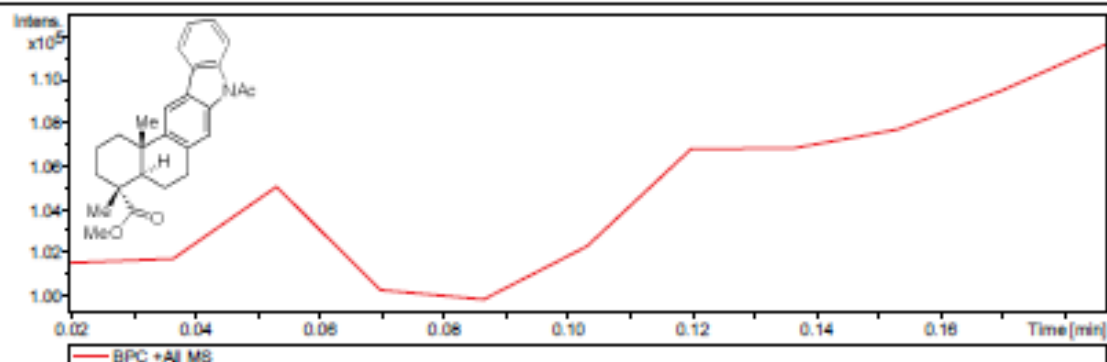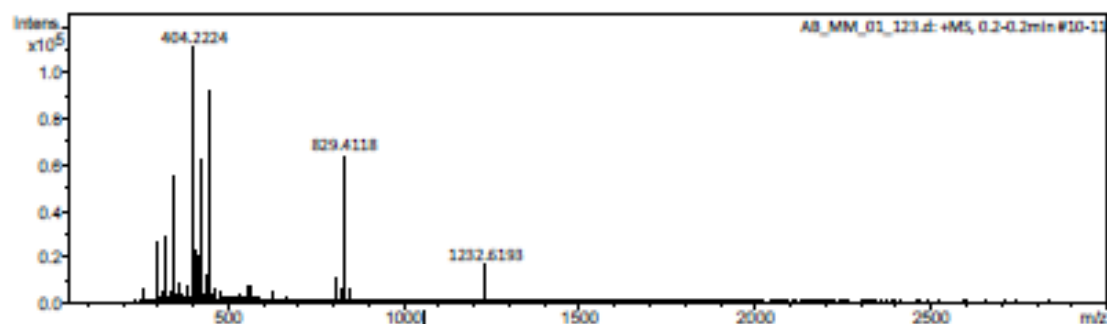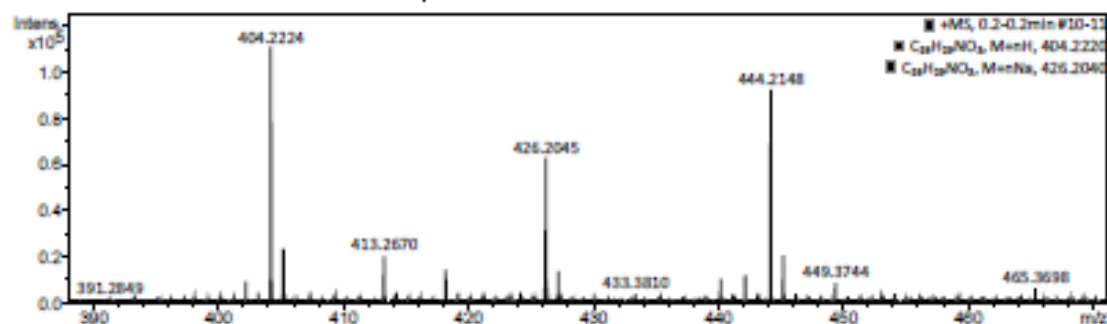

AB\_MM\_01\_123.d

Bruker Compass DataAnalysis 4.1

printed: 3/8/2021 12:49:17 PM

by: IISER Kolkata

Page 1 of 1

HRMS data of (+)-8n

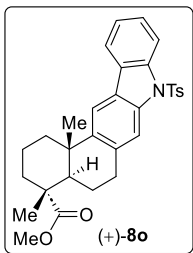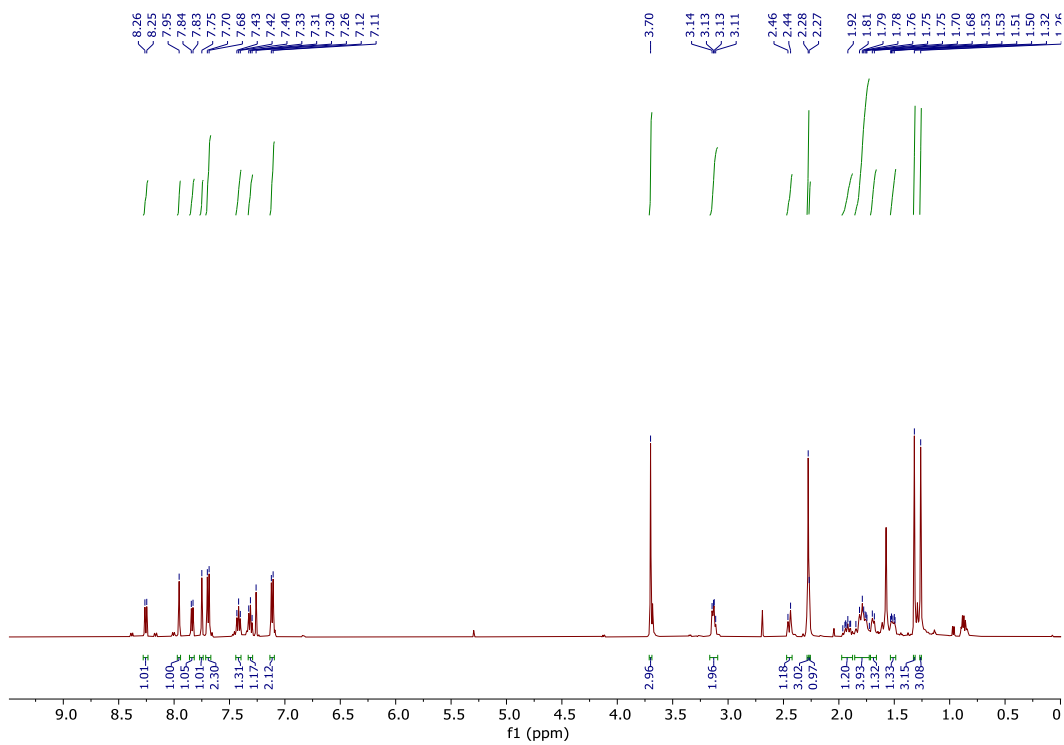

$^1\text{H NMR}$  (500 MHz,  $\text{CDCl}_3$ ) of (+)-**8o**

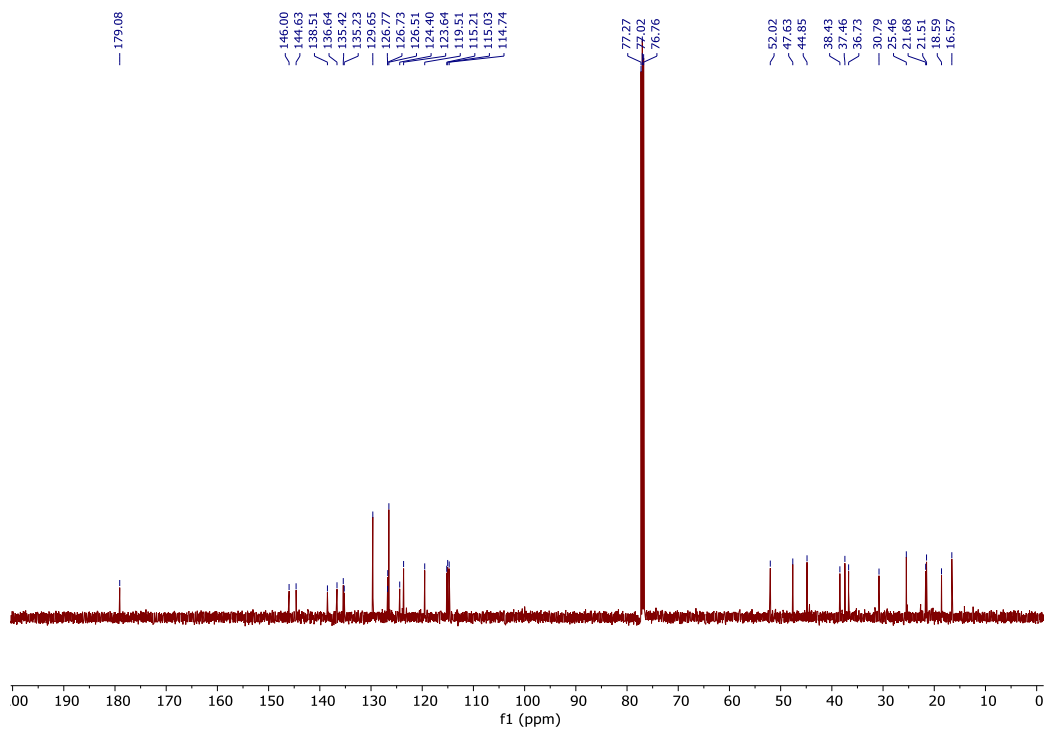

$^{13}\text{C NMR}$  (125 MHz,  $\text{CDCl}_3$ ) of (+)-**8o**

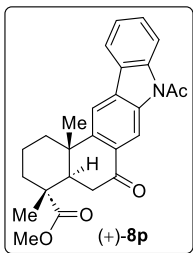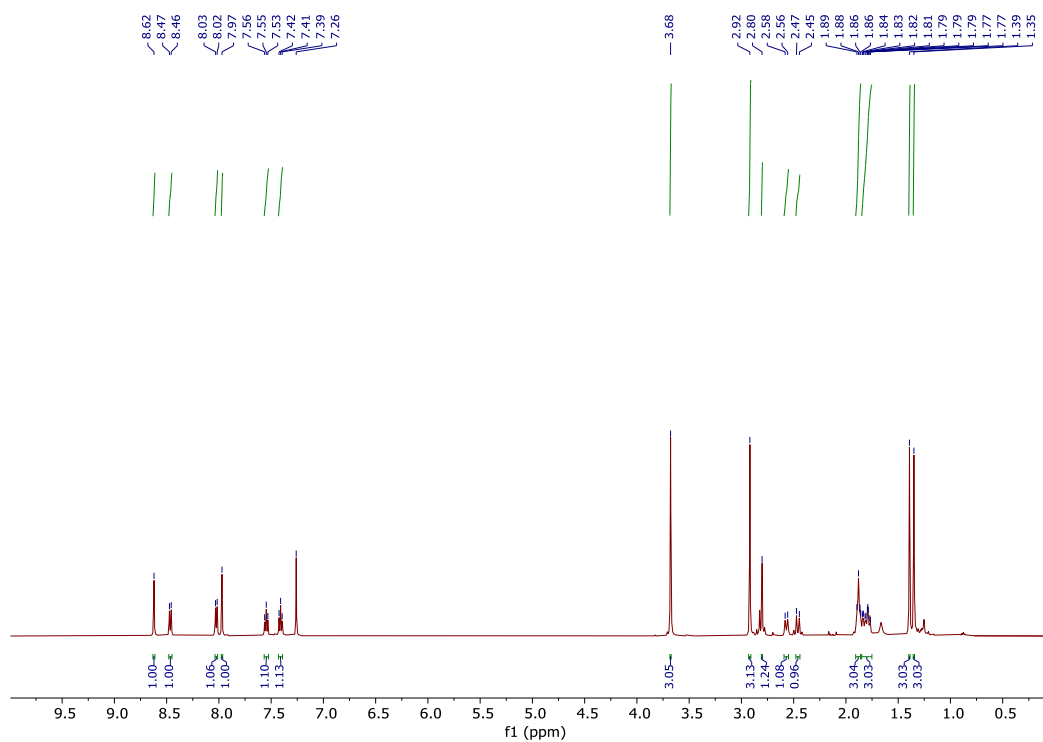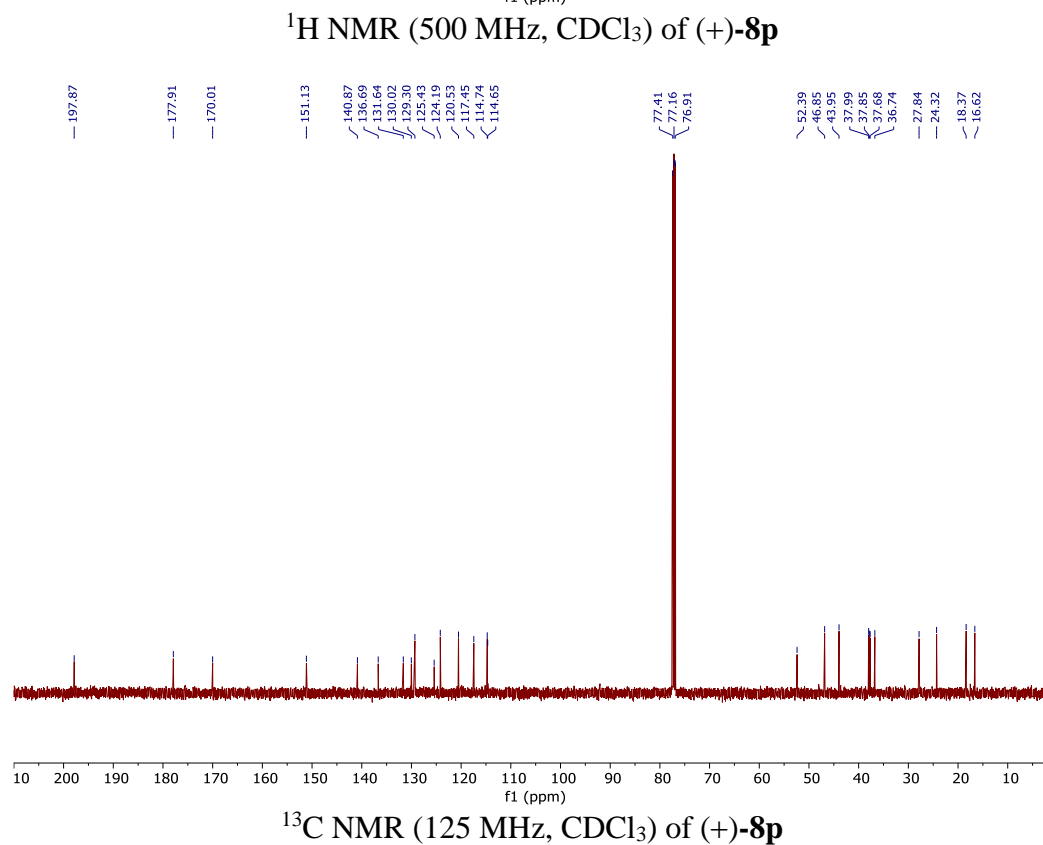

AB  
AB-MM-02-024 (0.879) Is (1.00,1.00) C<sub>26</sub>H<sub>28</sub>NO<sub>4</sub>

1: TOF MS ES+  
7.44e12

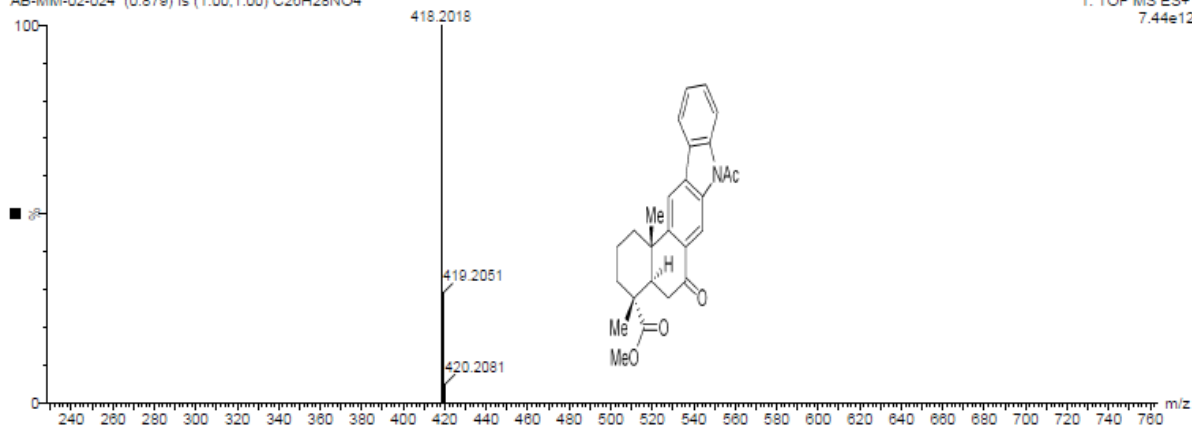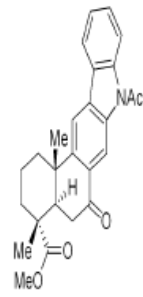

AB-MM-02-024 44 (0.879) AM (Cen,4, 80.00, Ar,10000.0,0.00,0.00)

1: TOF MS ES+  
3.31e8

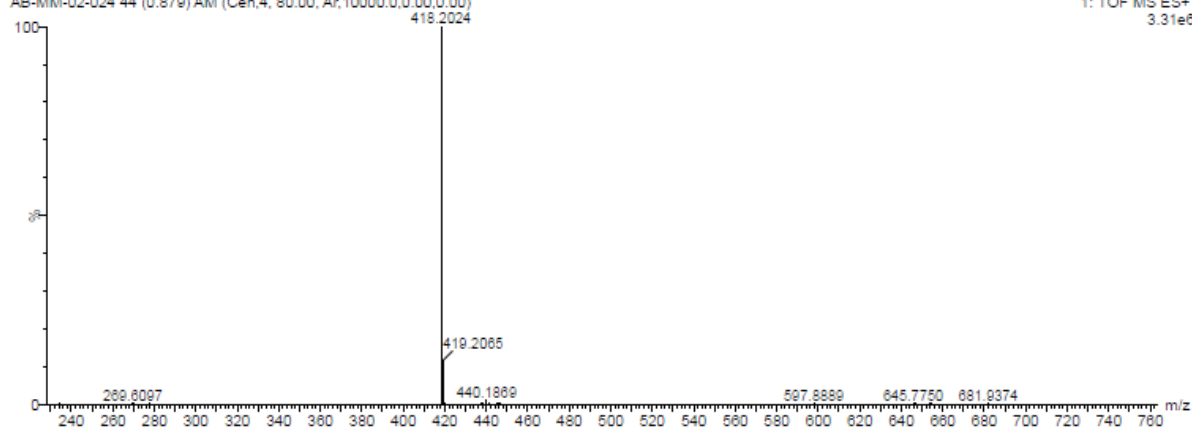

HRMS data of (+)-8p

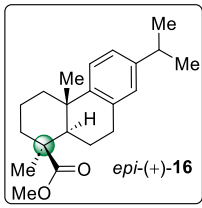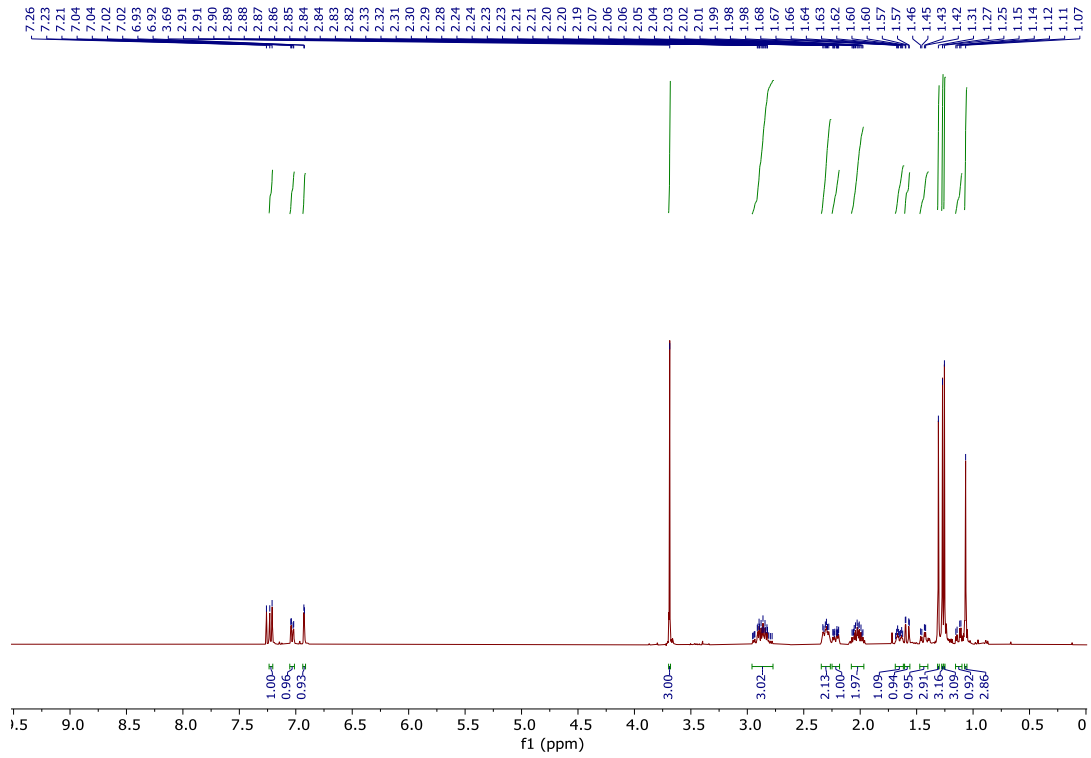

<sup>1</sup>H NMR (400 MHz, CDCl<sub>3</sub>) of epi-(+)-16

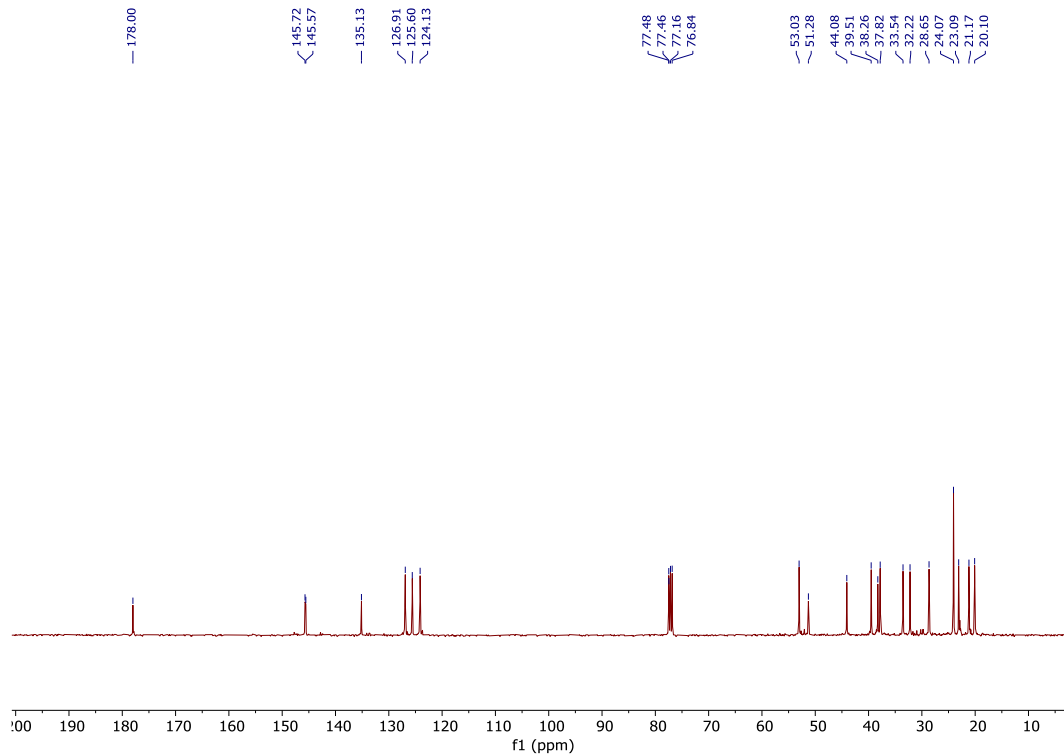

<sup>13</sup>C NMR (100 MHz, CDCl<sub>3</sub>) of epi-(+)-16



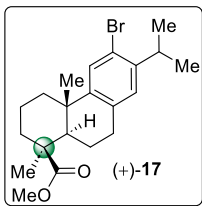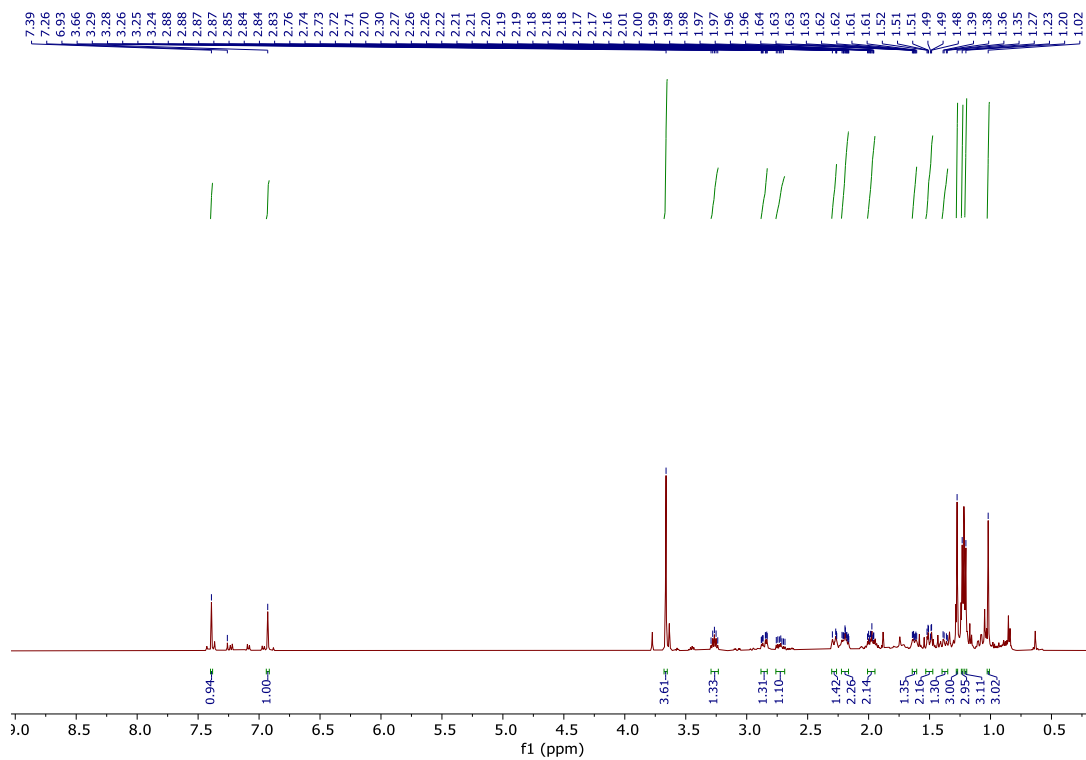

$^1\text{H}$  NMR (500 MHz,  $\text{CDCl}_3$ ) of (+)-17

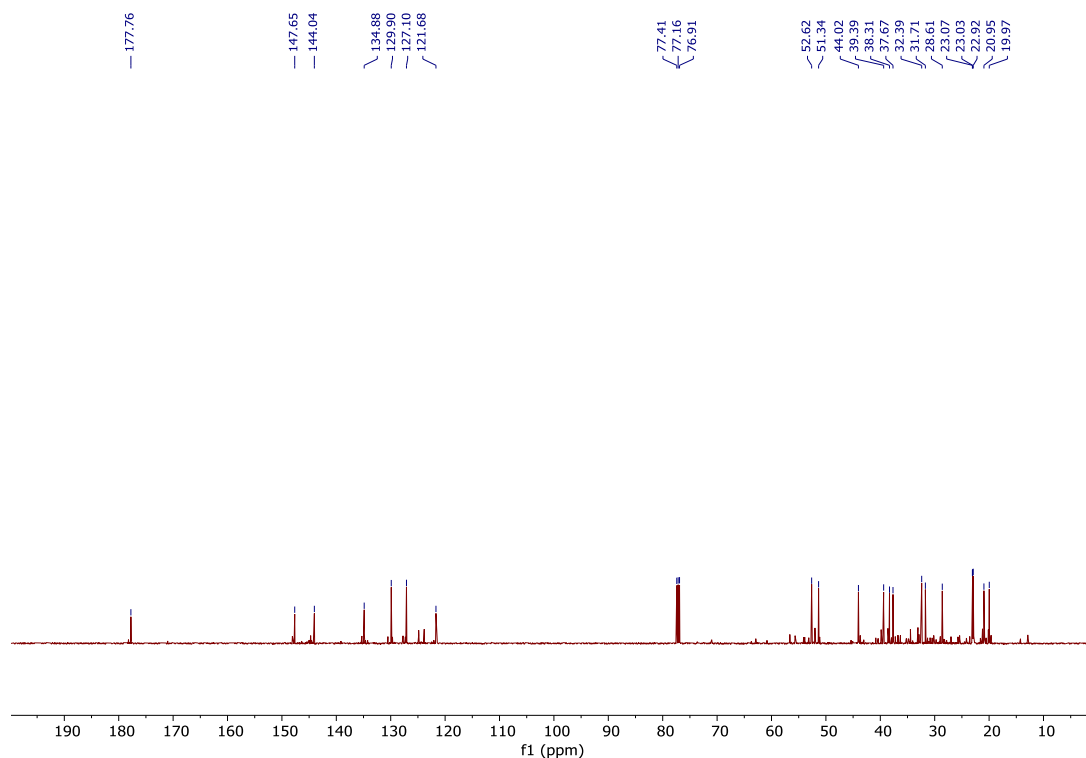

$^{13}\text{C}$  NMR (125 MHz,  $\text{CDCl}_3$ ) of (+)-17

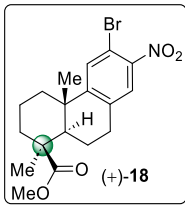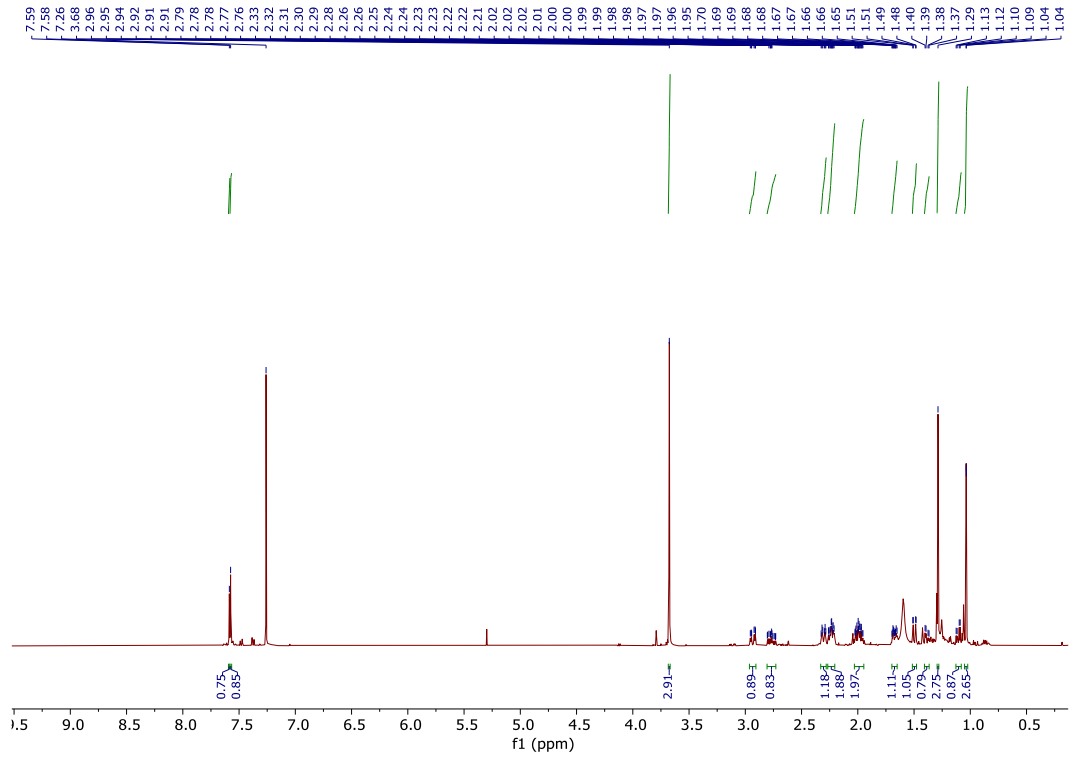

$^1\text{H NMR}$  (500 MHz,  $\text{CDCl}_3$ ) of (+)-18

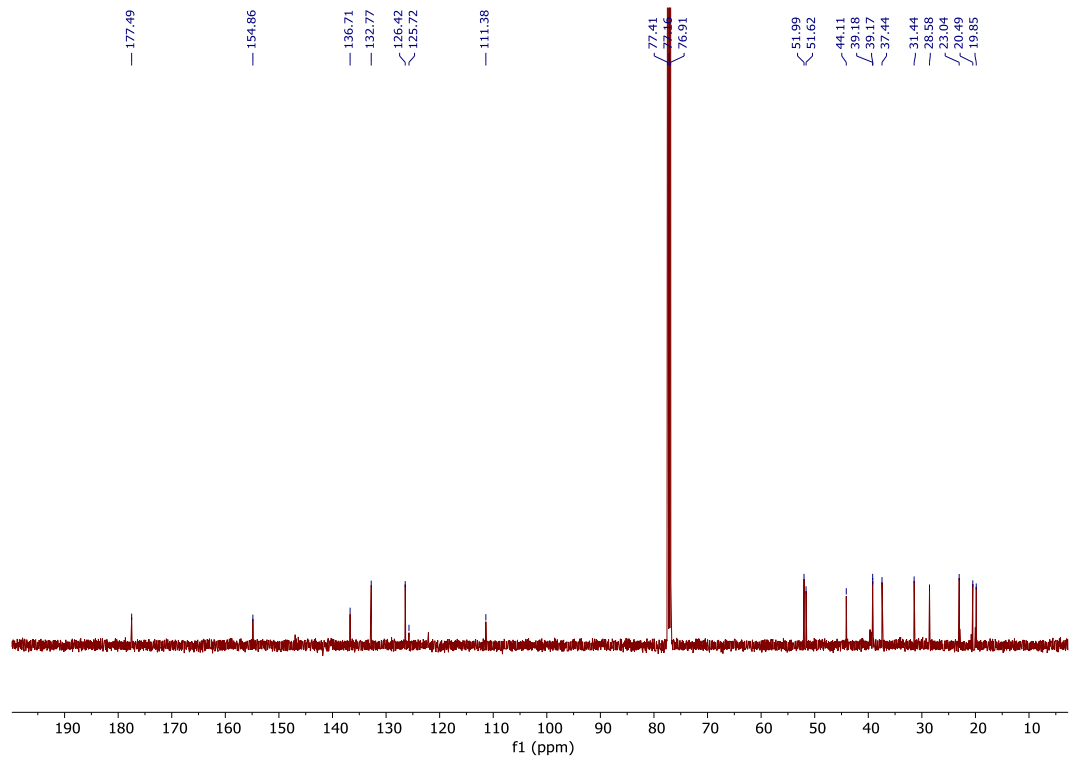

$^{13}\text{C NMR}$  (125 MHz,  $\text{CDCl}_3$ ) of (+)-18

# Display Report

## Analysis Info

Analysis Name D:\Data\User data\2022\MAR\lab\_mm01297.d  
Method Tune\_pos\_Standard.m  
Sample Name ab\_mm01297  
Comment signal dropping issue

Acquisition Date 3/7/2022 12:09:22 PM

Operator IISER Kolkata  
Instrument maXis Impact 8282001.00127

## Acquisition Parameter

|             |          |                      |          |                    |           |
|-------------|----------|----------------------|----------|--------------------|-----------|
| Source Type | ESI      | Ion Polarity         | Positive | Set Nebulizer      | 0.5 Bar   |
| Focus       | Active   | Set Capillary        | 3400 V   | Set Dry Heater     | 200 °C    |
| Scan Begin  | 50 m/z   | Set End Plate Offset | -500 V   | Set Dry Gas        | 4.0 l/min |
| Scan End    | 1000 m/z | Set Charging Voltage | 2000 V   | Set Diverter Valve | Source    |
|             |          | Set Corona           | 0 nA     | Set APCI Heater    | 0 °C      |

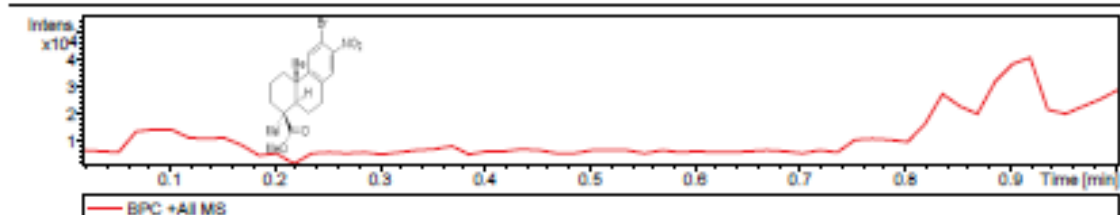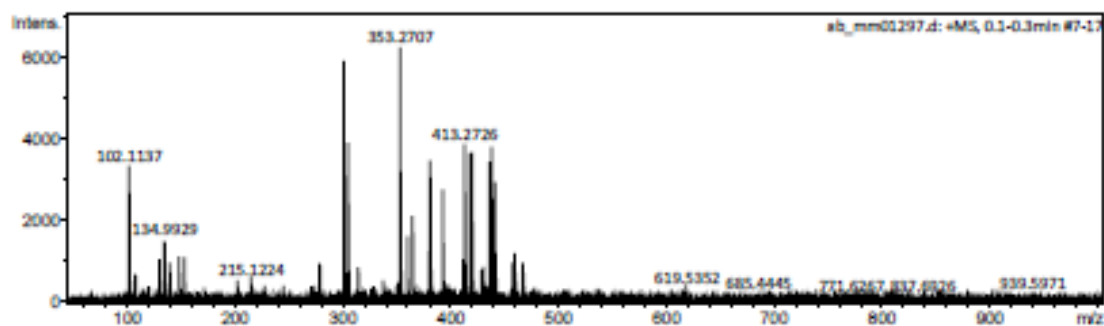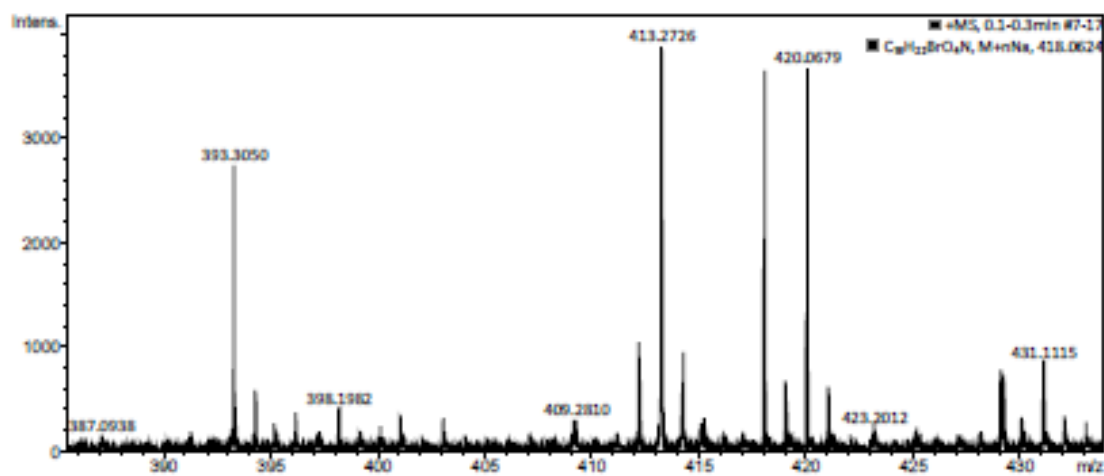

ab\_mm01297.d

Bruker Compass DataAnalysis 4.1

printed: 3/7/2022 12:12:23 PM

by: IISER Kolkata

Page 1 of 1

HRMS data of (+)-18

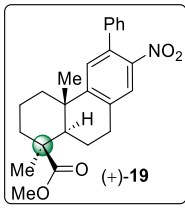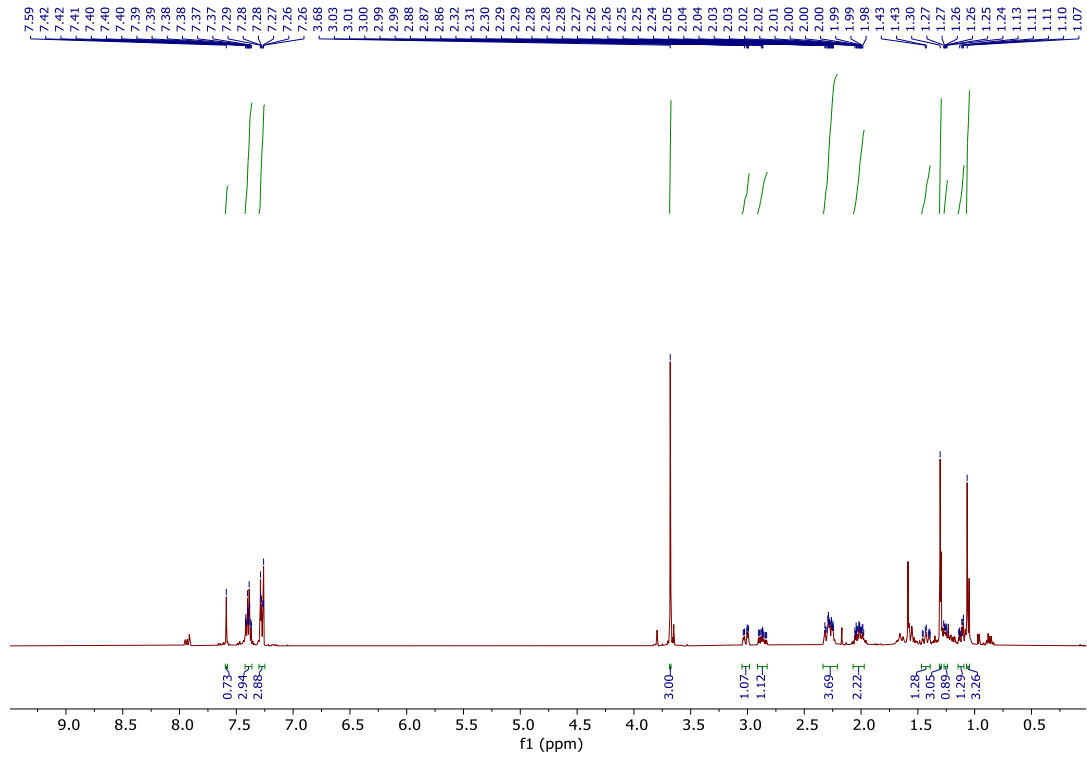

<sup>1</sup>H NMR (500 MHz, CDCl<sub>3</sub>) of (+)-19

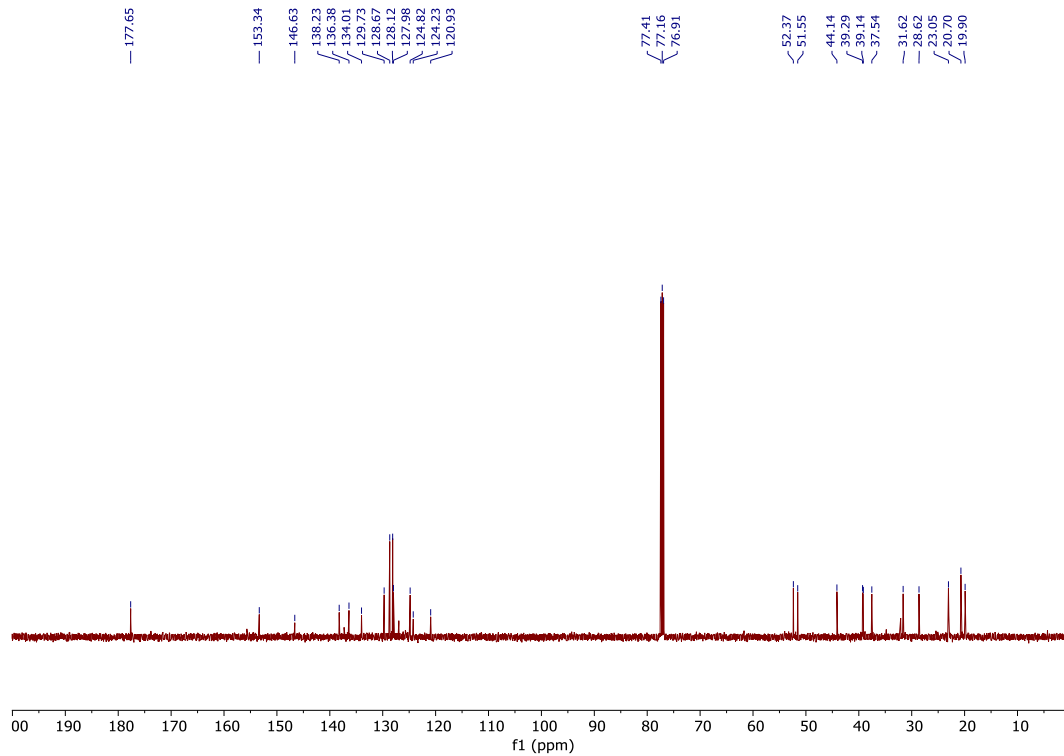

<sup>13</sup>C NMR (125 MHz, CDCl<sub>3</sub>) of (+)-19

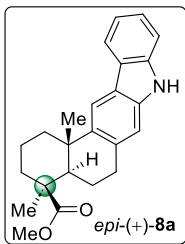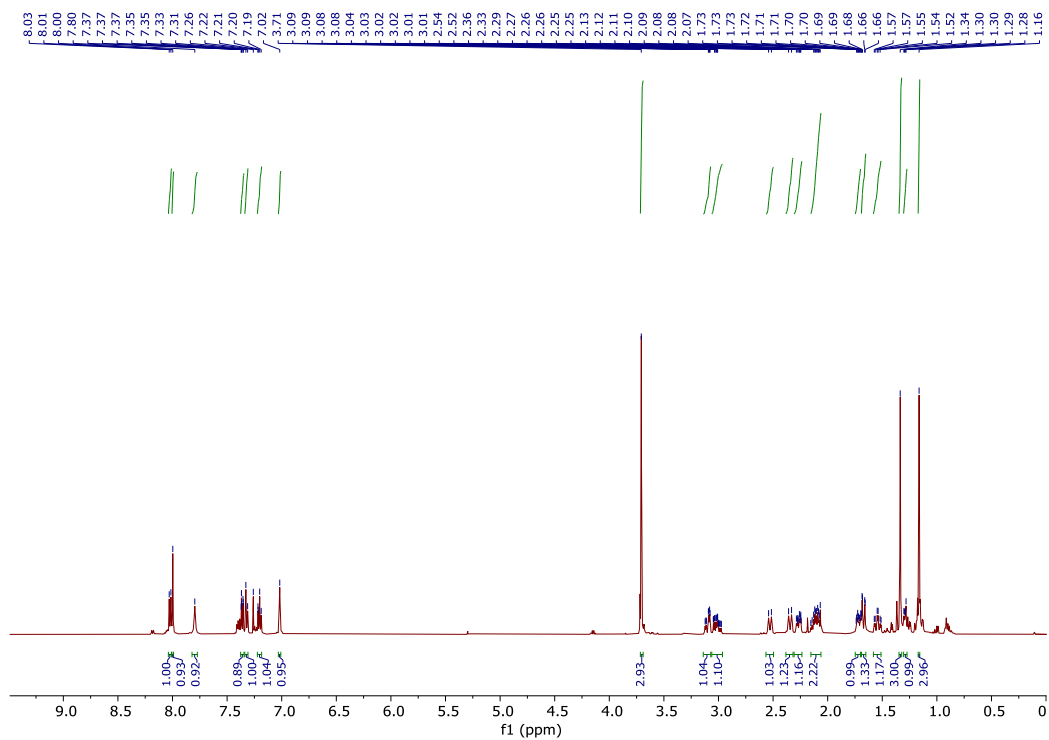

<sup>1</sup>H NMR (500 MHz, CDCl<sub>3</sub>) of *epi*-(+)-**8a**

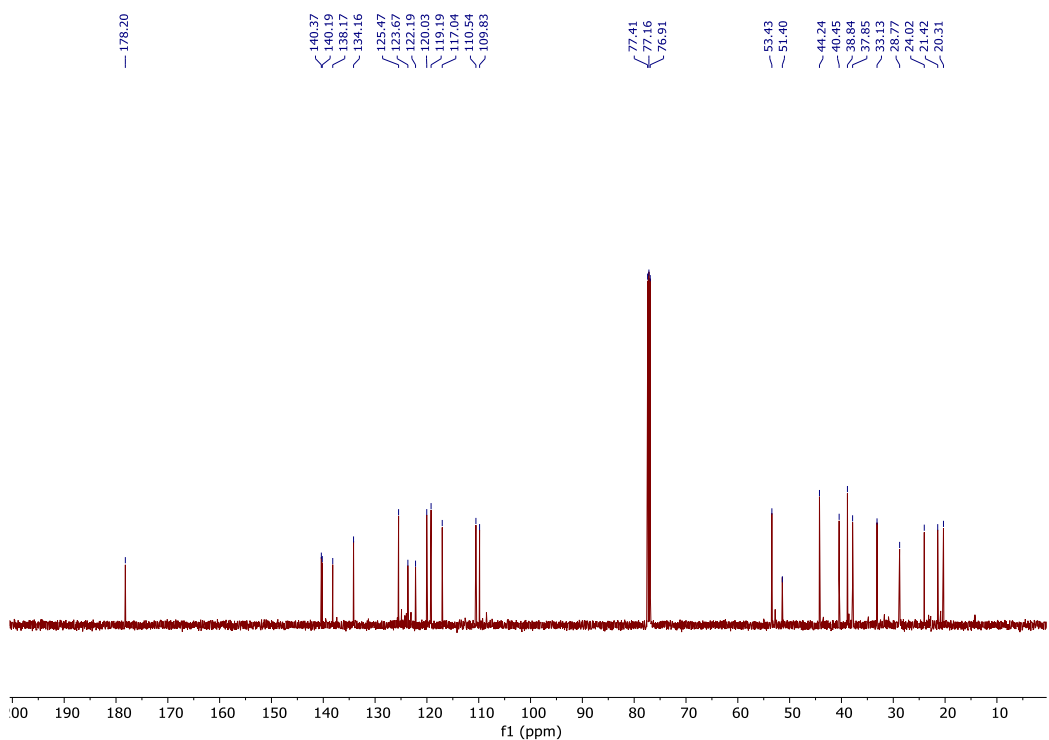

<sup>13</sup>C NMR (125 MHz, CDCl<sub>3</sub>) of *epi*-(+)-**8a**

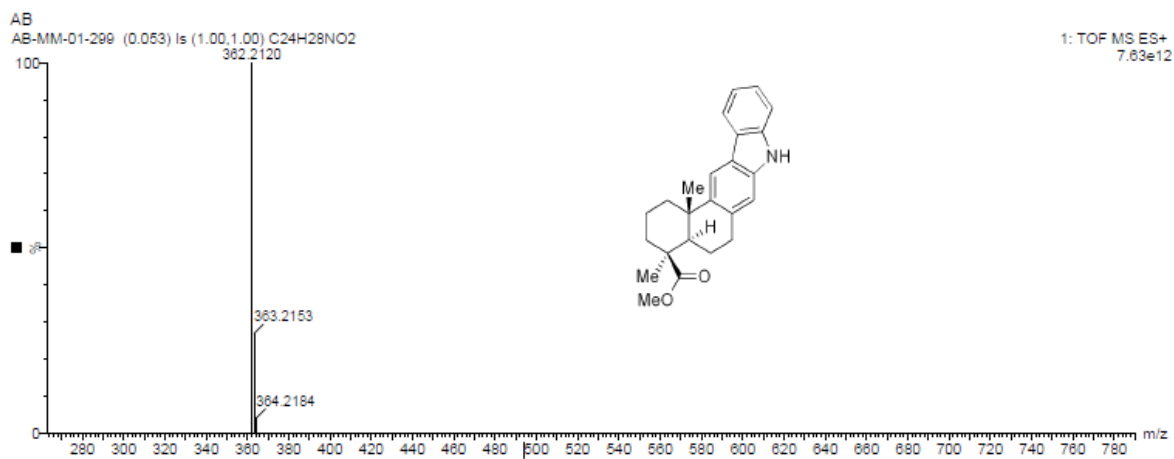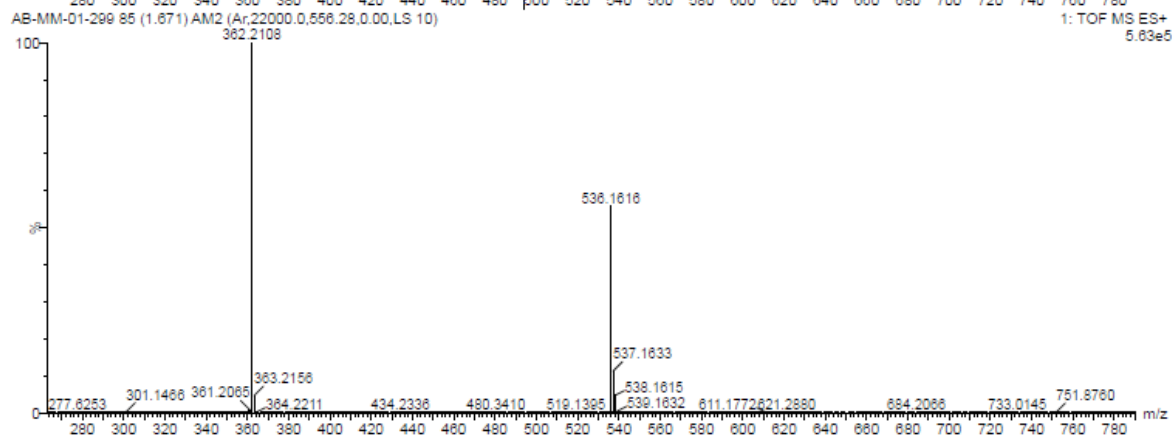

HRMS data of *epi*-(+)-**8a**

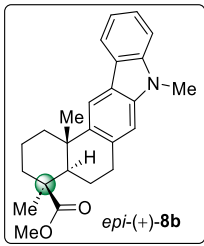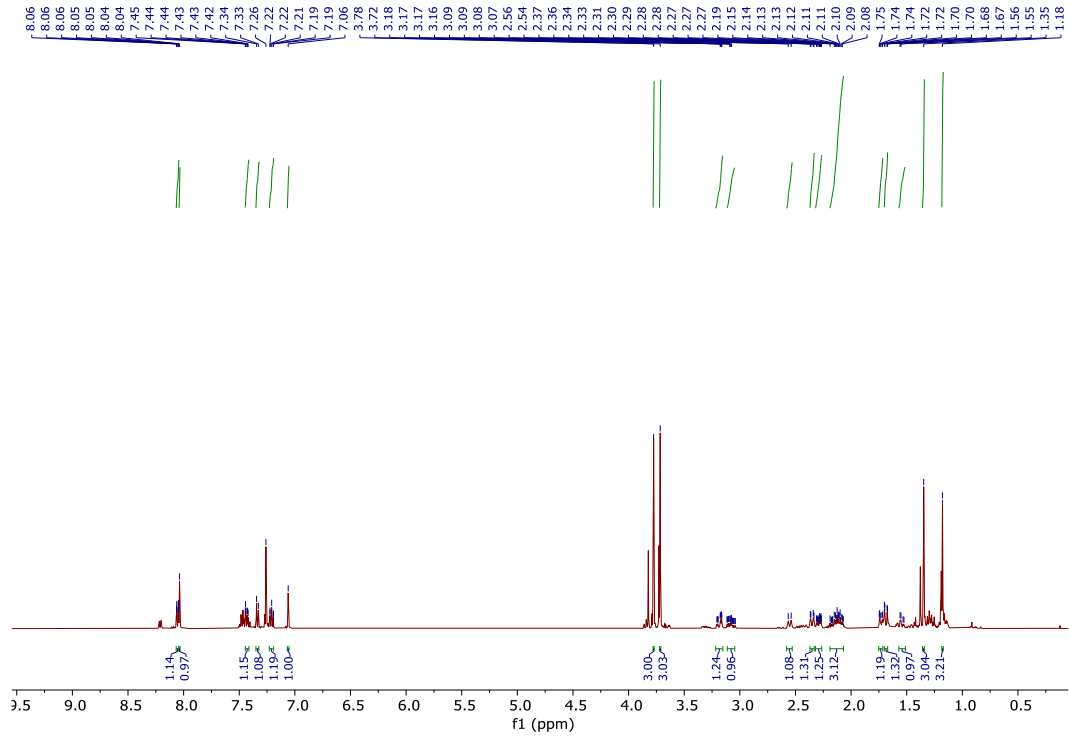

$^1\text{H}$  NMR (500 MHz,  $\text{CDCl}_3$ ) of *epi-(+)-8b*

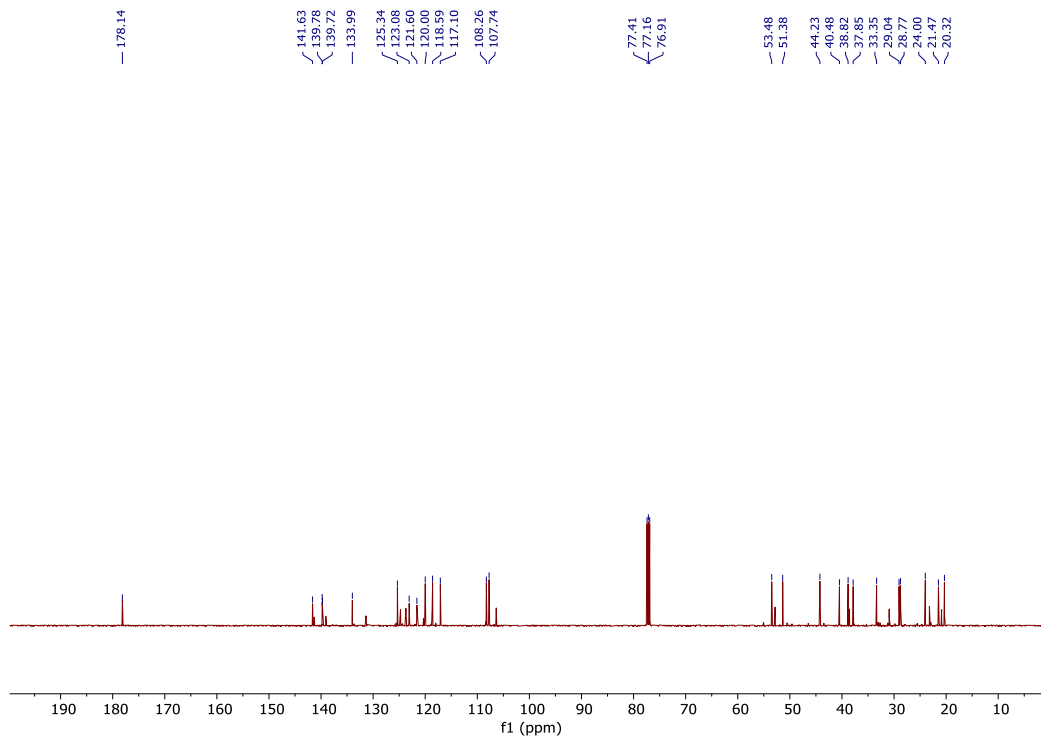

$^{13}\text{C}$  NMR (125 MHz,  $\text{CDCl}_3$ ) of *epi-(+)-8b*

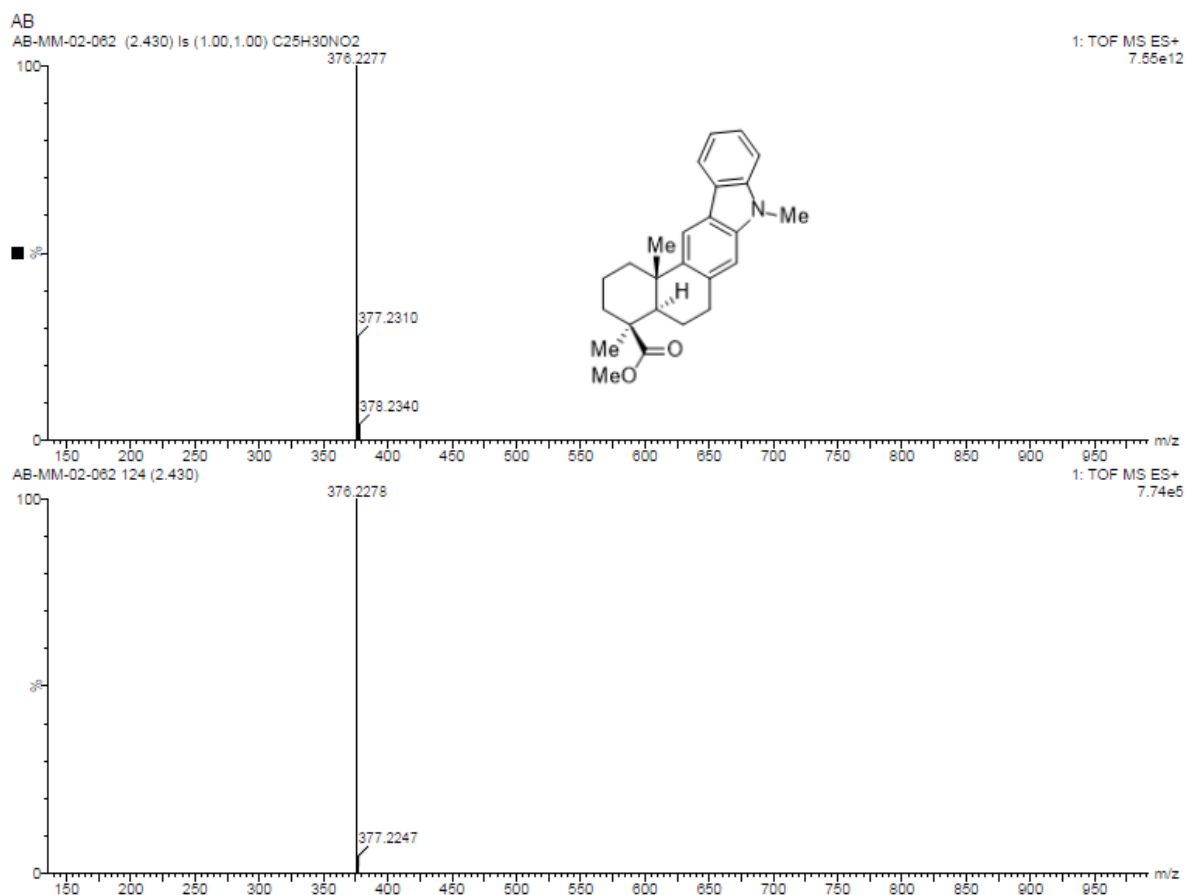



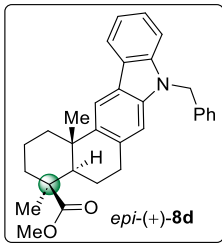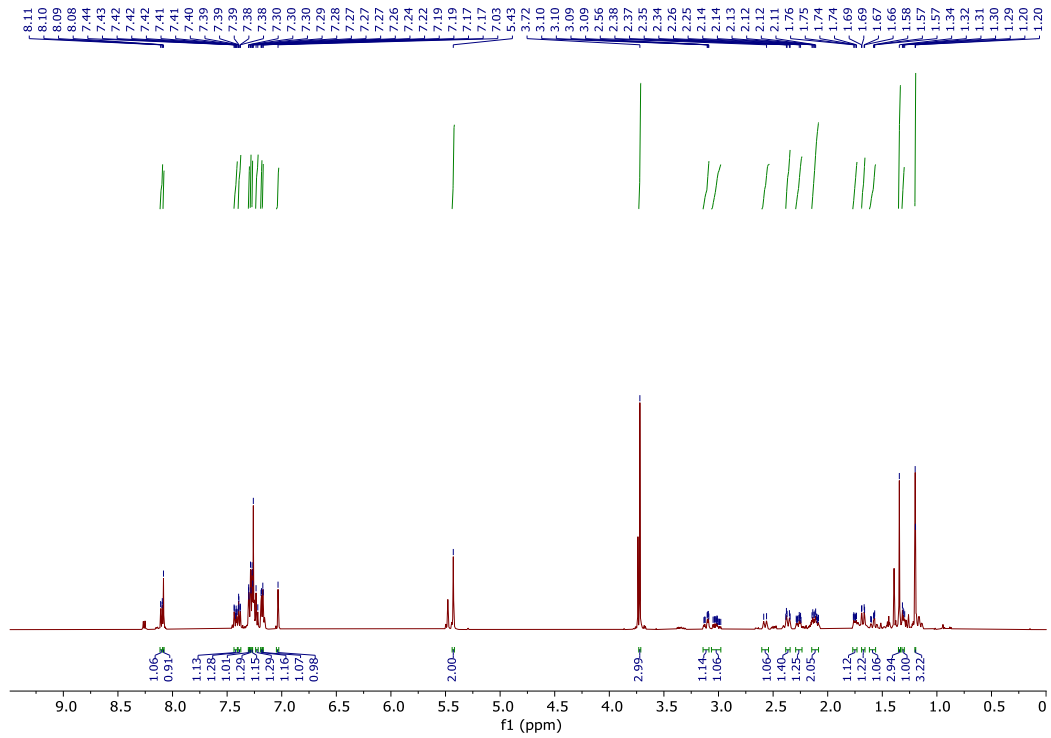

<sup>1</sup>H NMR (500 MHz, CDCl<sub>3</sub>) of *epi*-(+)-8d

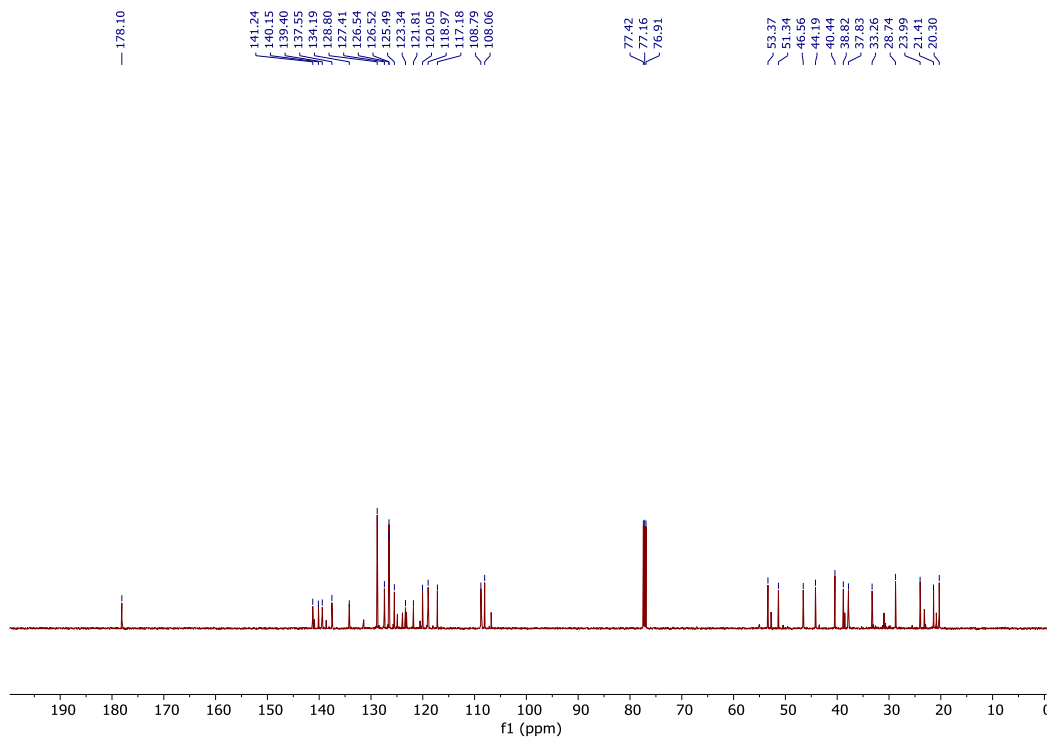

<sup>13</sup>C NMR (125 MHz, CDCl<sub>3</sub>) of *epi*-(+)-8d

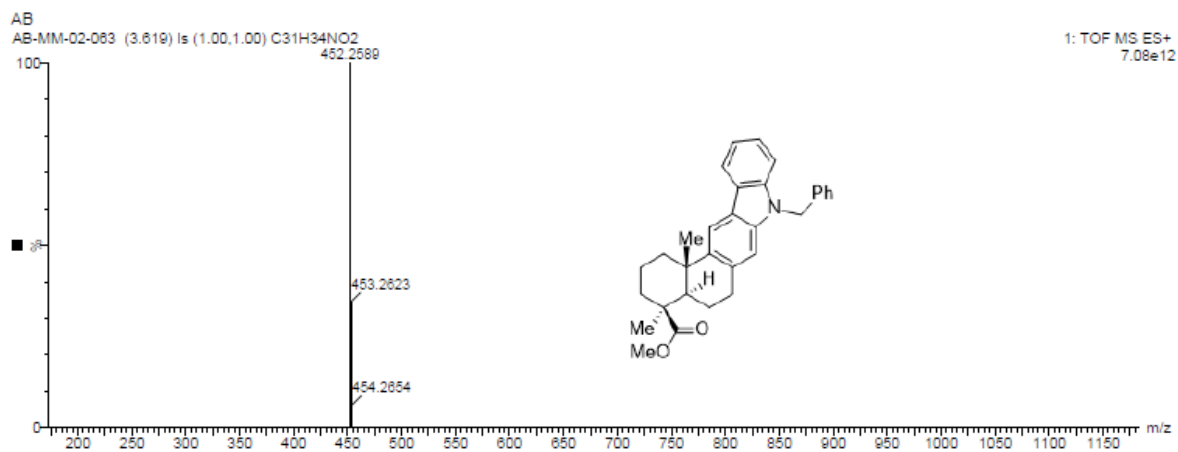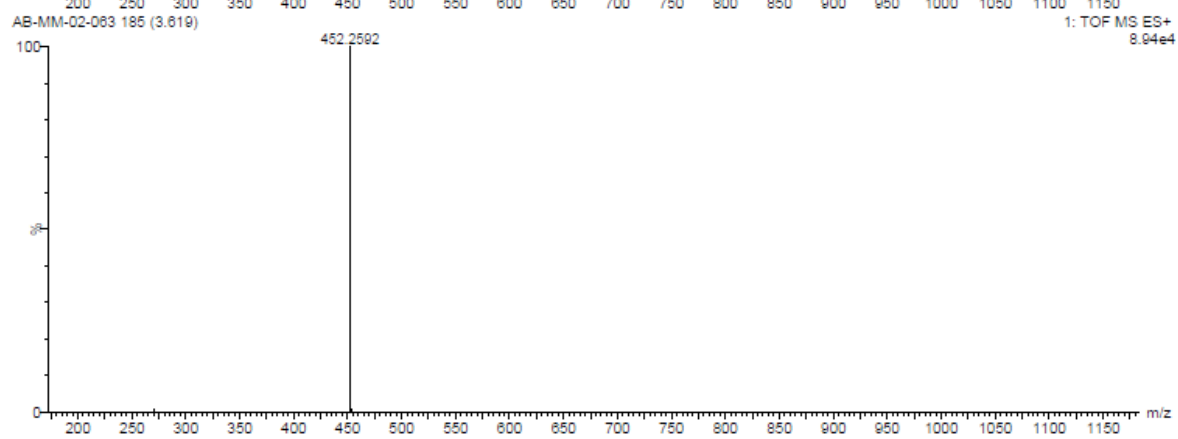

HRMS data of *epi*-(+)-**8d**

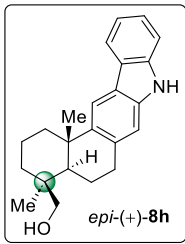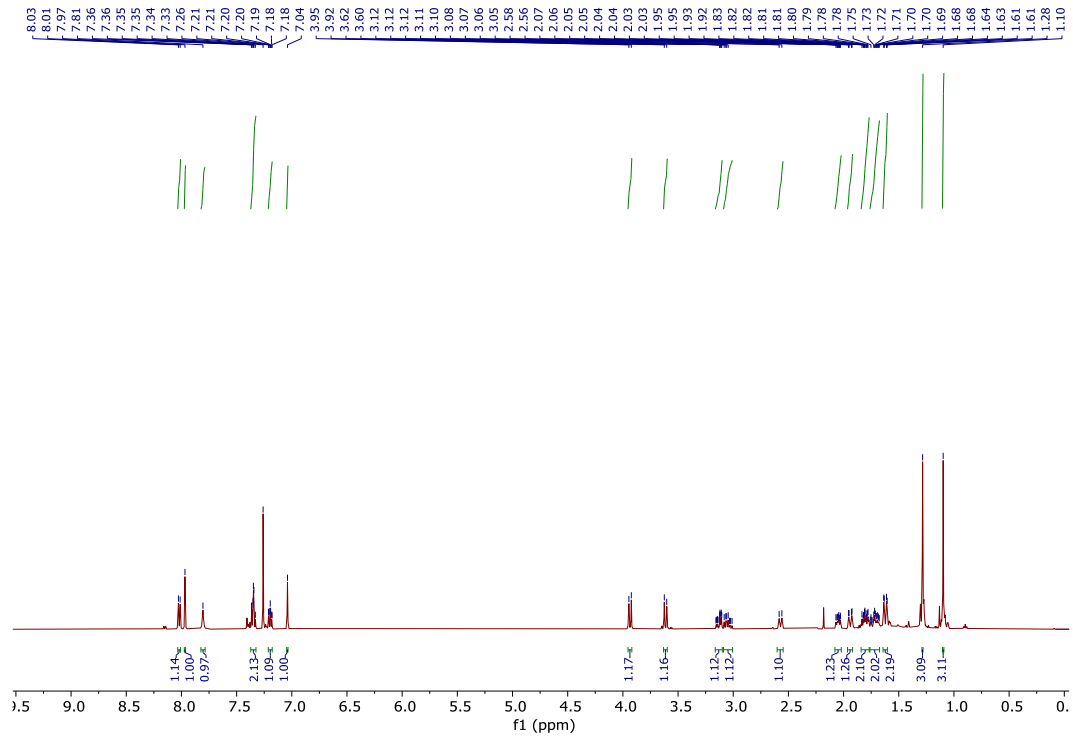

$^1\text{H NMR}$  (500 MHz,  $\text{CDCl}_3$ ) of *epi-(+)-8h*

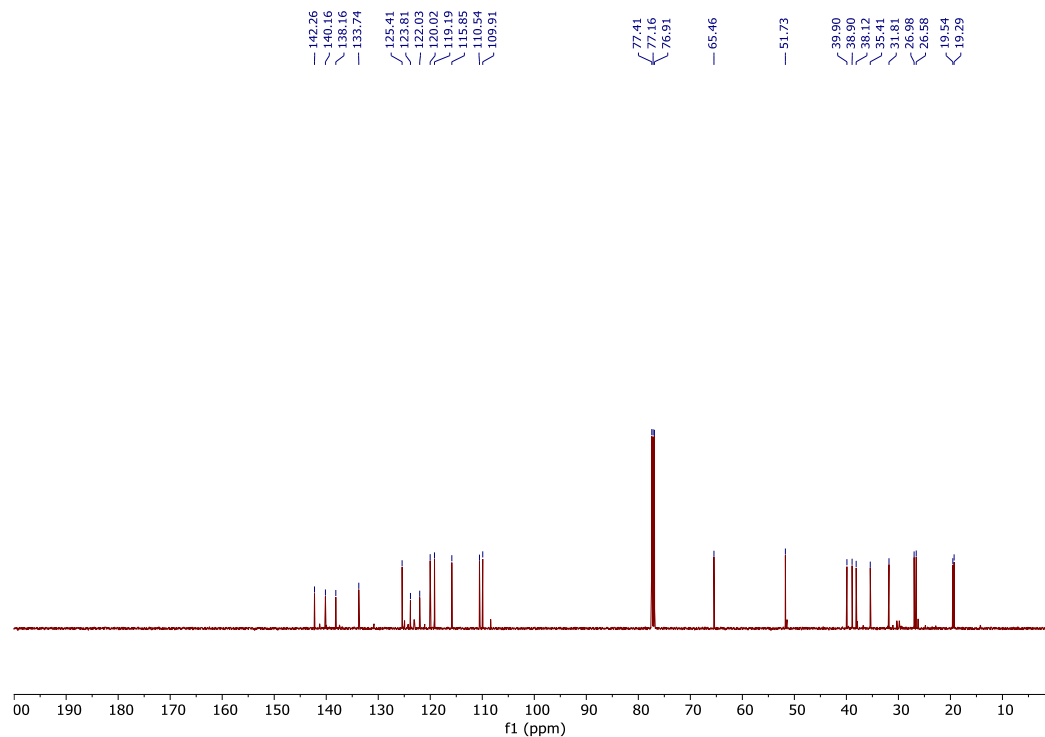

$^{13}\text{C NMR}$  (125 MHz,  $\text{CDCl}_3$ ) of *epi-(+)-8h*

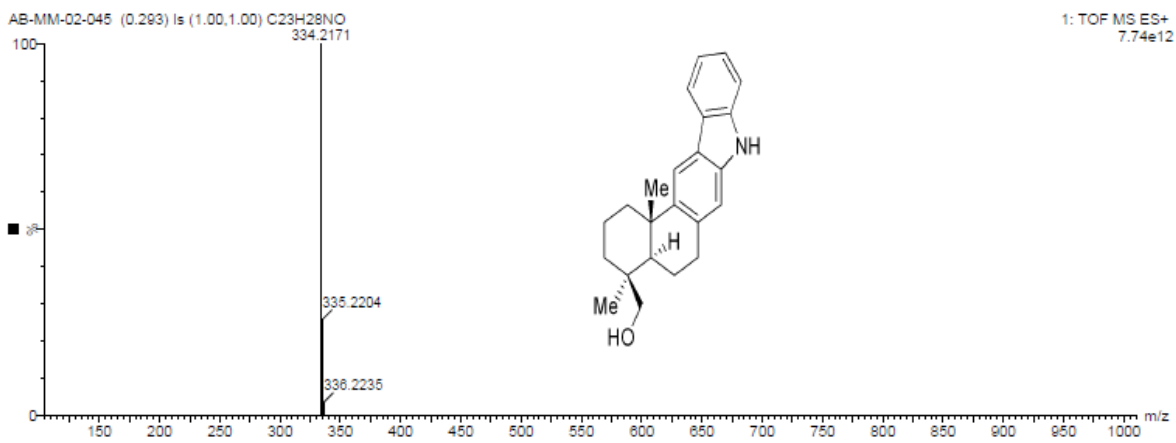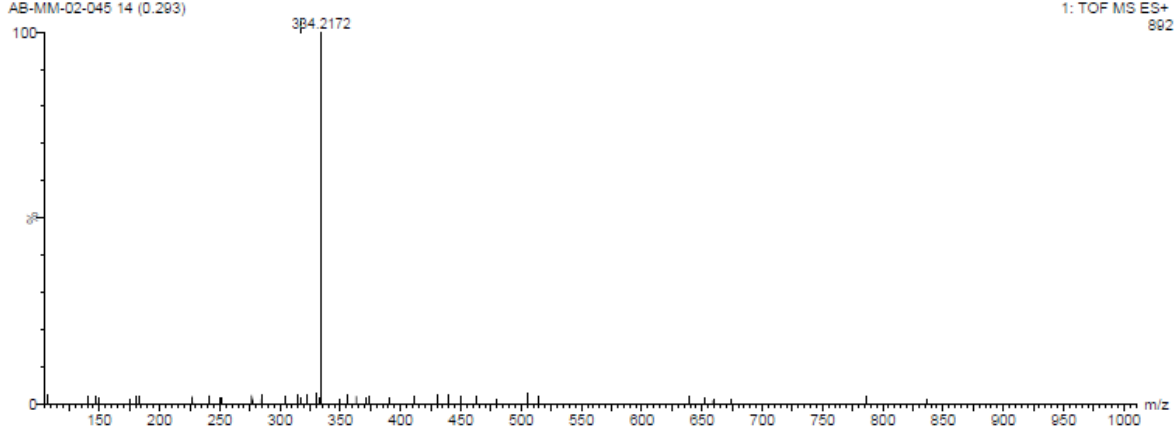

HRMS data of *epi*-(+)-**8h**

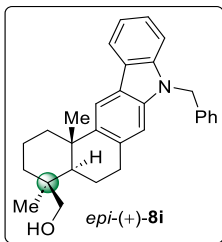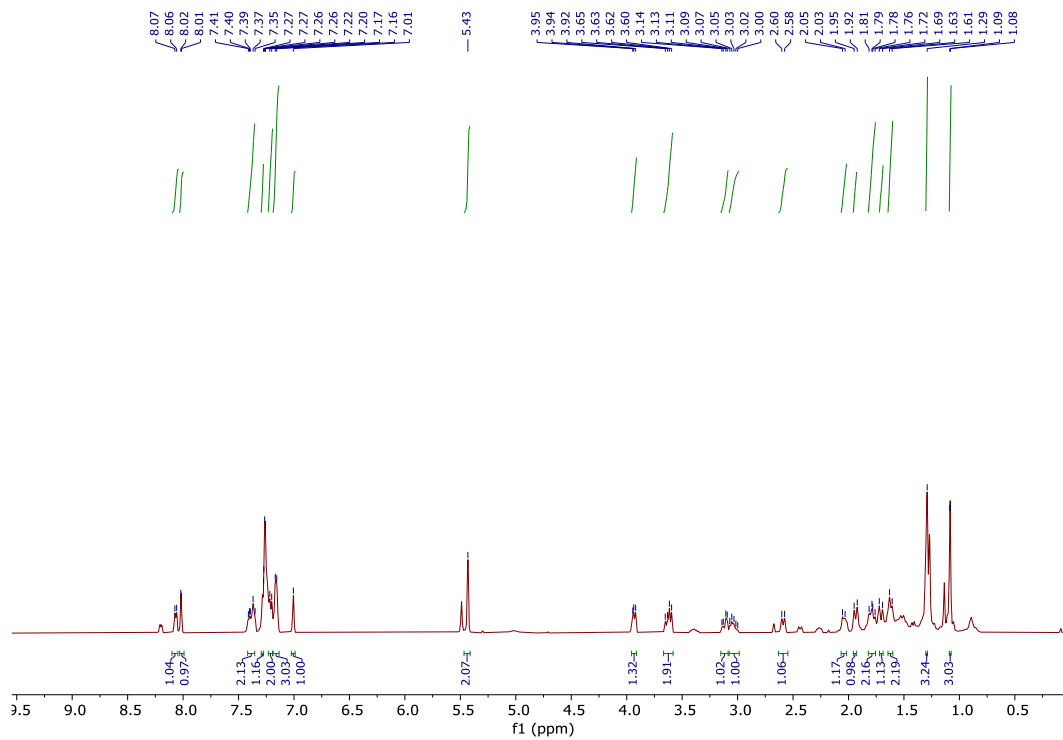

<sup>1</sup>H NMR (500 MHz, CDCl<sub>3</sub>) of *epi*-(+)-**8i**

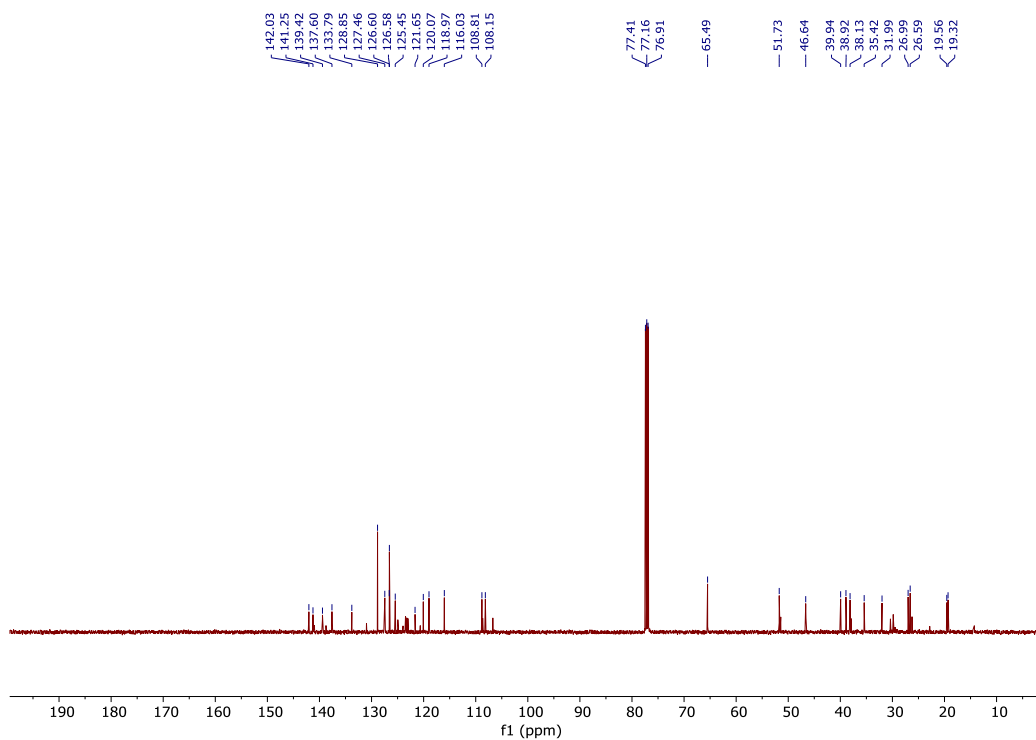

<sup>13</sup>C NMR (125 MHz, CDCl<sub>3</sub>) of *epi*-(+)-**8i**

AB  
AB-MM-02-084 (1.449) Is (1.00,1.00) C<sub>30</sub>H<sub>34</sub>NO

1: TOF MS ES+  
7.17e12

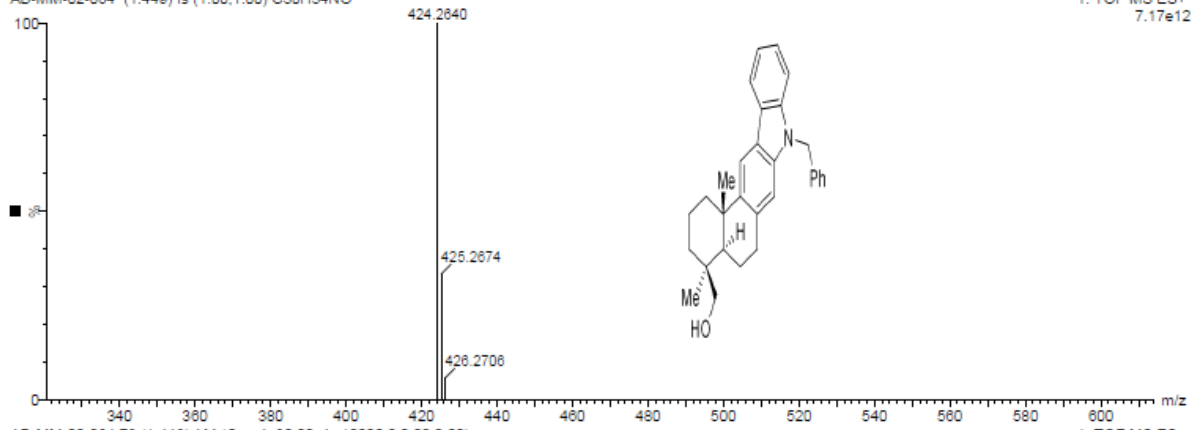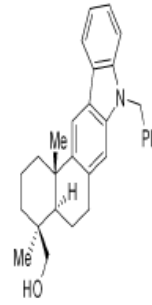

AB-MM-02-084 73 (1.449) AM (Cen,4, 80.00, Ar,10000.0,0.00,0.00)

1: TOF MS ES+  
2.06e5

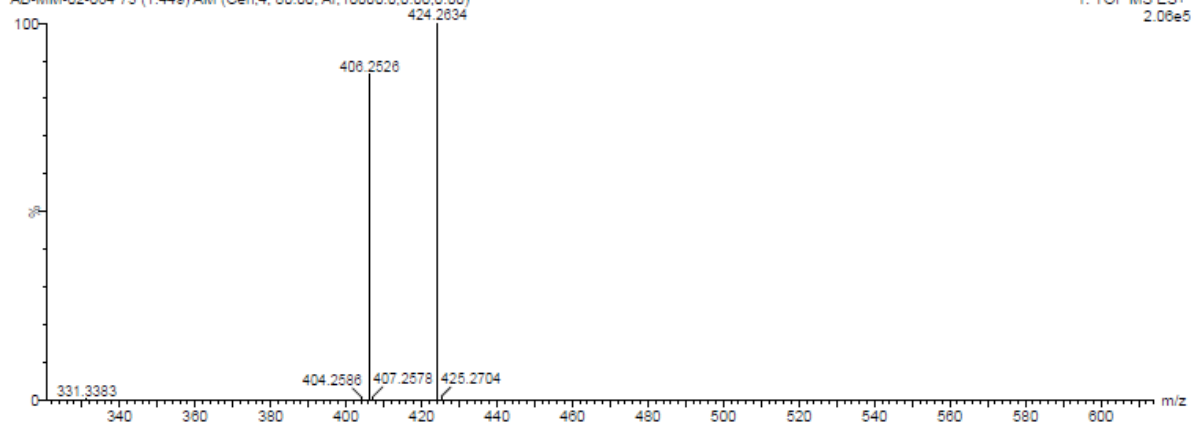

HRMS data of *epi*-(+)-**8i**

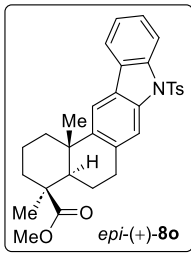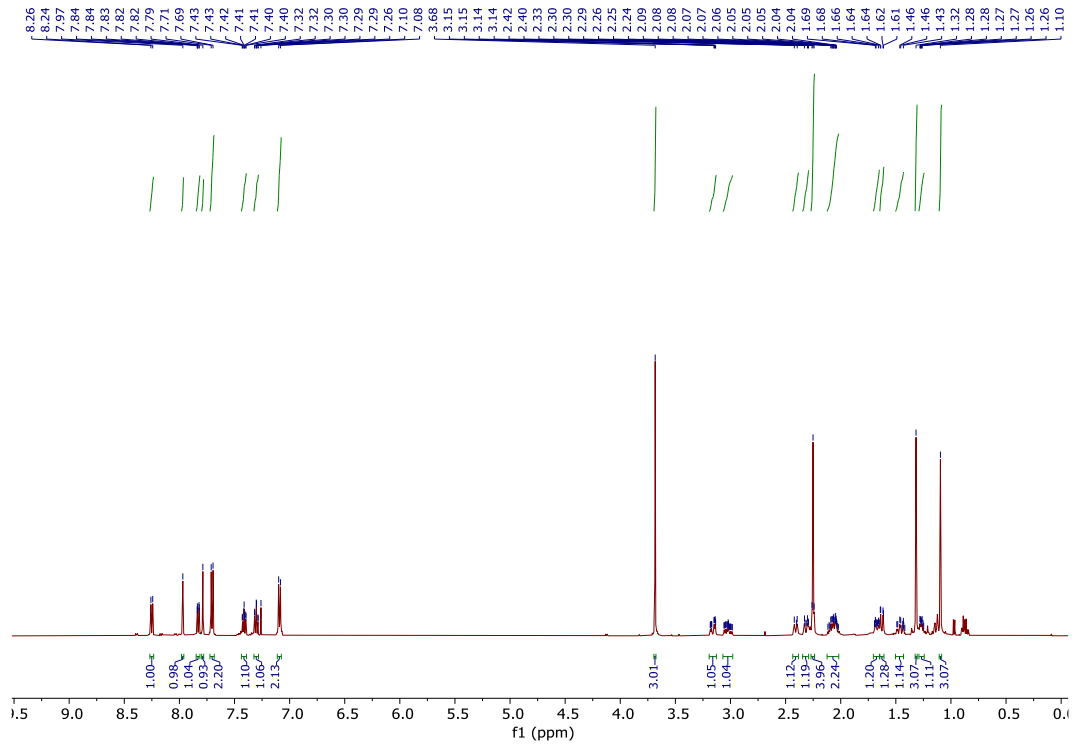

<sup>1</sup>H NMR (500 MHz, CDCl<sub>3</sub>) of *epi*-(+)-**8o**

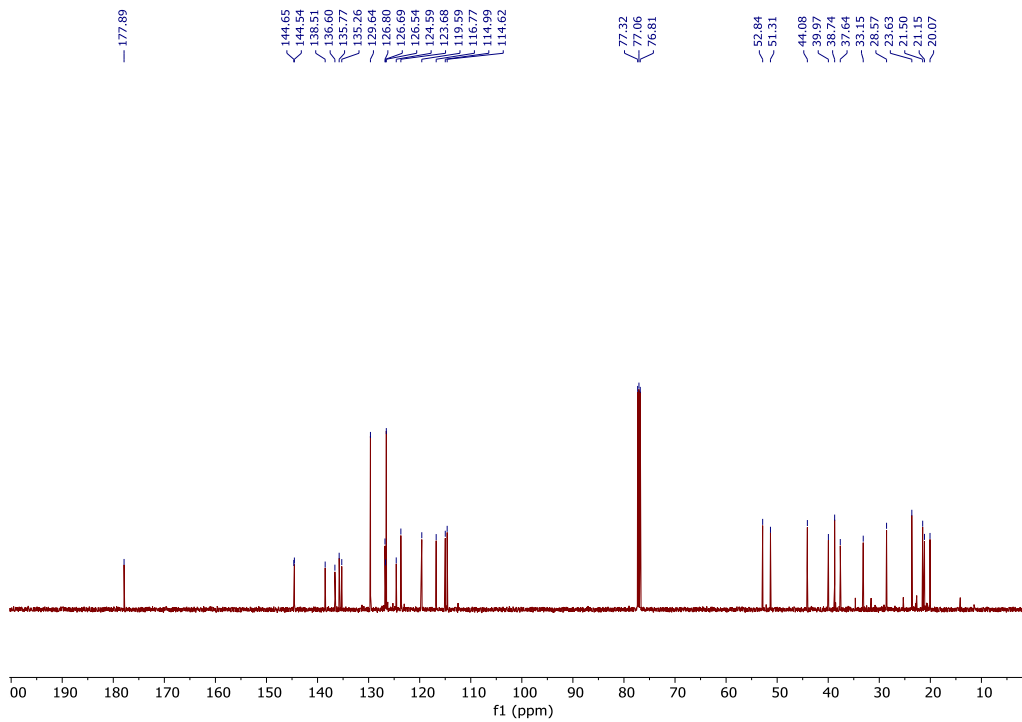

<sup>13</sup>C NMR (125 MHz, CDCl<sub>3</sub>) of *epi*-(+)-**8o**

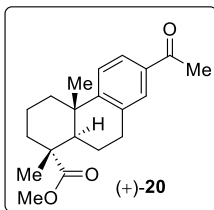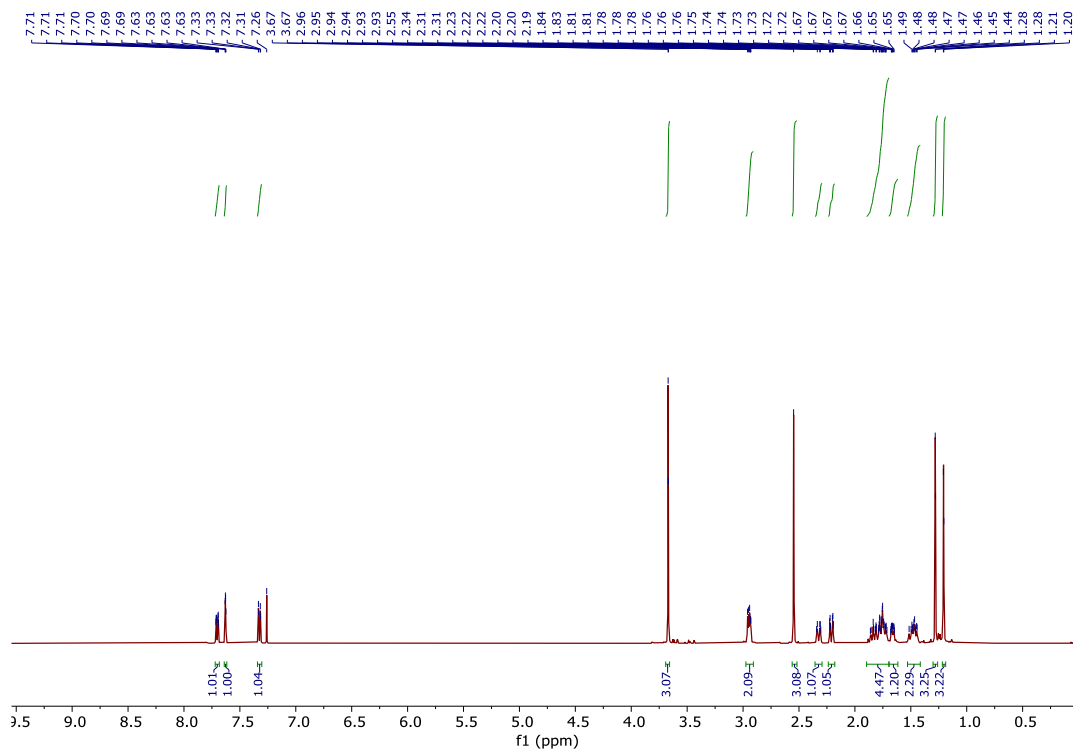

$^1\text{H}$  NMR (500 MHz,  $\text{CDCl}_3$ ) of compound (+)-20

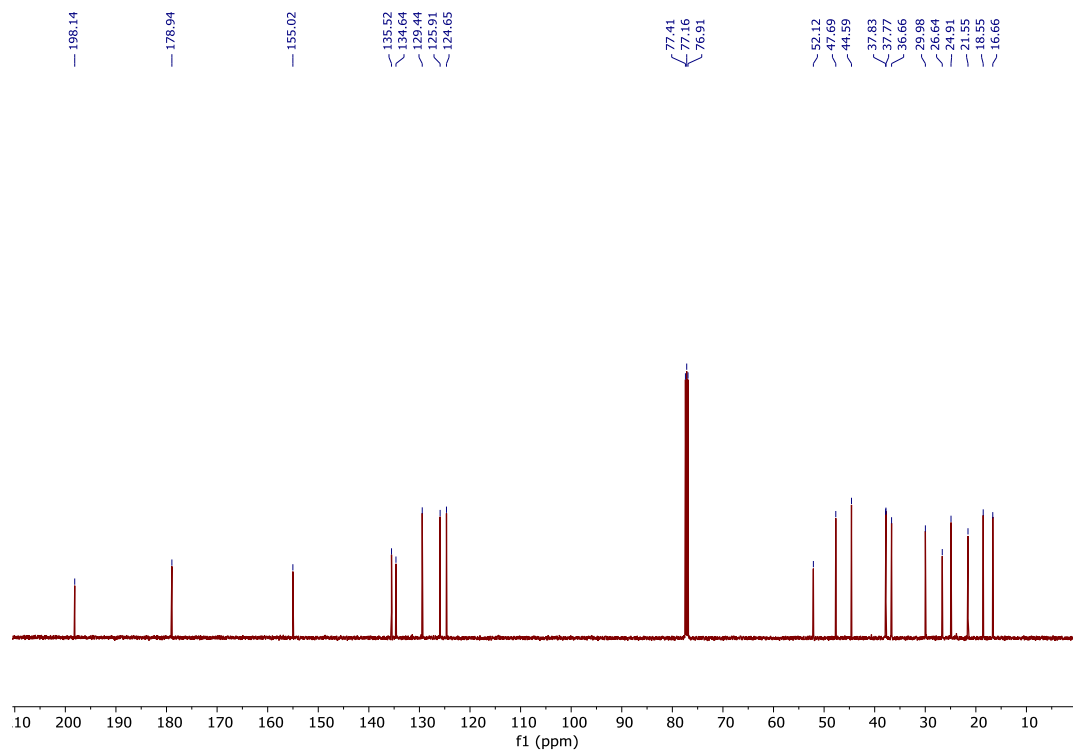

$^{13}\text{C}$  NMR (125 MHz,  $\text{CDCl}_3$ ) of compound (+)-20



# Display Report

**Analysis Info**  
Analysis Name: D:\Data\NEW USER DATA 2017\2019\APR\24 APR\Dr A Bisai-KS-01-238\_1-B,2\_01\_6051.d  
Method: hrlcms-20 sept.m  
Sample Name: Dr A Bisai-KS-01-238  
Comment:  
Acquisition Date: 4/24/2019 12:33:54 PM  
Operator: RUCHI  
Instrument: micrOTOF-Q II 10330

**Acquisition Parameter**

|             |          |                       |           |                  |           |
|-------------|----------|-----------------------|-----------|------------------|-----------|
| Source Type | ESI      | Ion Polarity          | Positive  | Set Nebulizer    | 1.2 Bar   |
| Focus       | Active   | Set Capillary         | 4500 V    | Set Dry Heater   | 200 °C    |
| Scan Begin  | 50 m/z   | Set End Plate Offset  | -500 V    | Set Dry Gas      | 7.0 l/min |
| Scan End    | 3000 m/z | Set Collision Cell RF | 130.0 Vpp | Set Diverl Valve | Waste     |

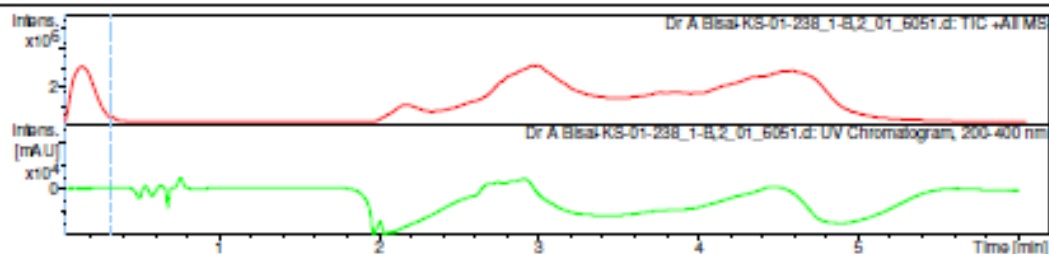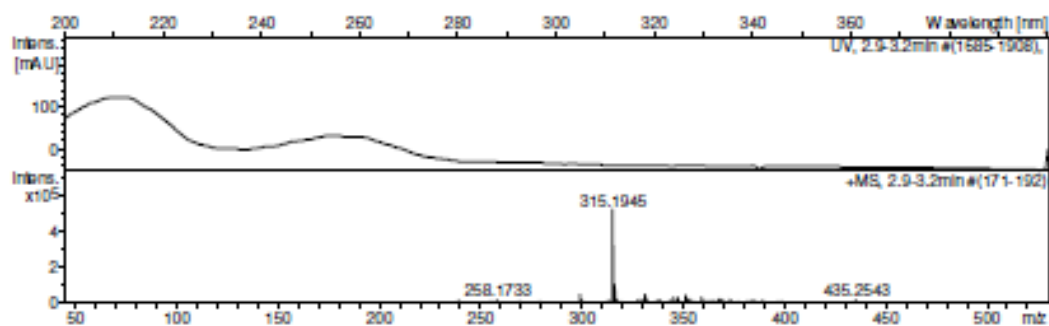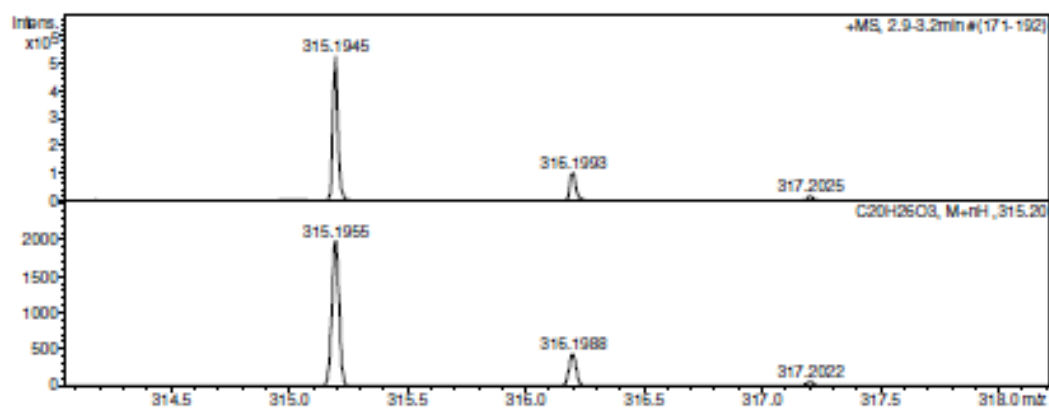

HRMS data of (+)-20

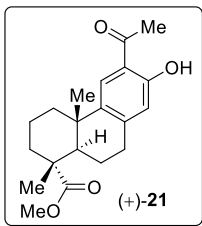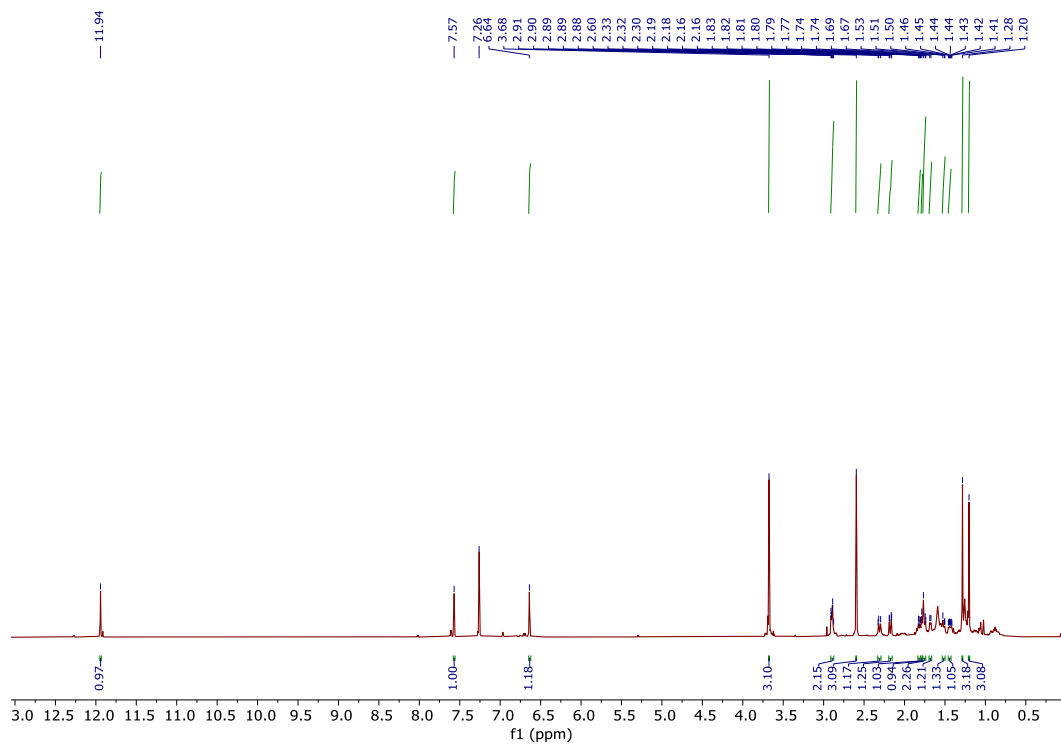

$^1\text{H}$  NMR (500 MHz,  $\text{CDCl}_3$ ) of compound (+)-21

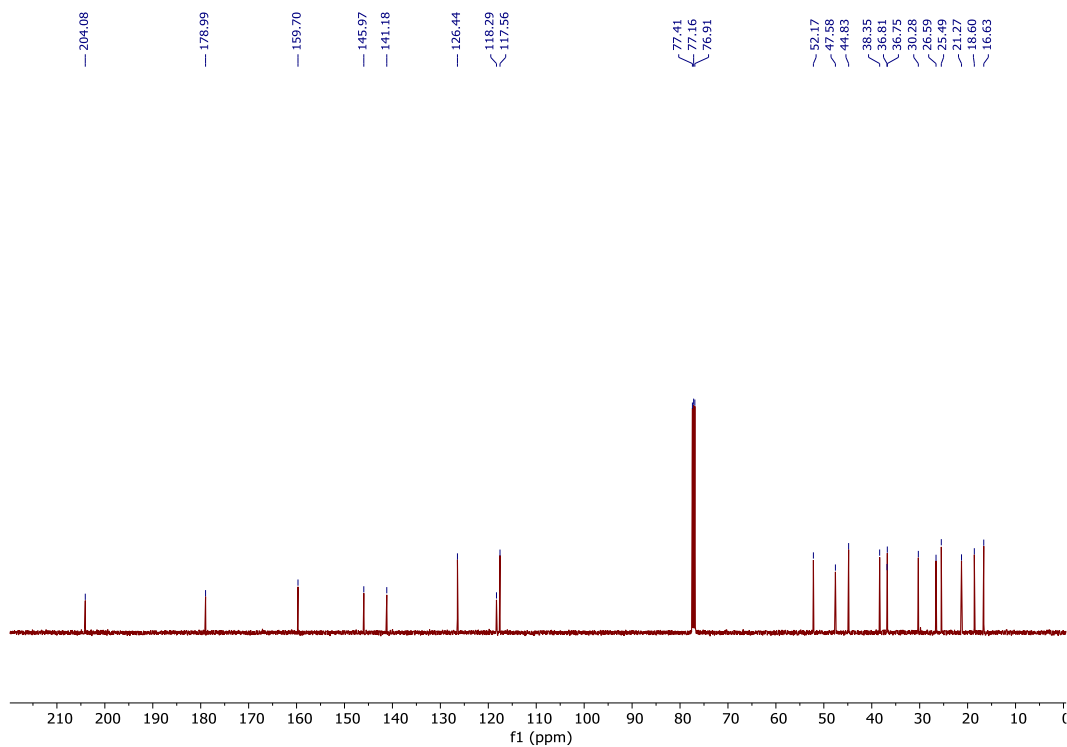

$^{13}\text{C}$  NMR (125 MHz,  $\text{CDCl}_3$ ) of compound (+)-21

AB  
AB-NKR-01034 (0.896) Is (1.00,1.00) C20H27O4

1: TOF MS ES+  
7.98e12

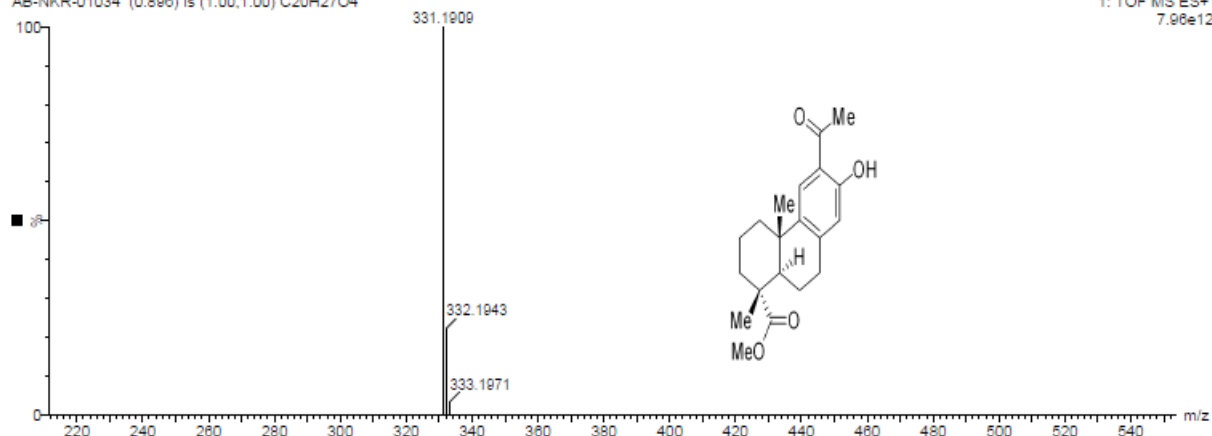

AB-NKR-01034 45 (0.896) AM (Gen.4, 80.00, Ar,10000.0,0.00,0.00)

1: TOF MS ES+  
6.69e6

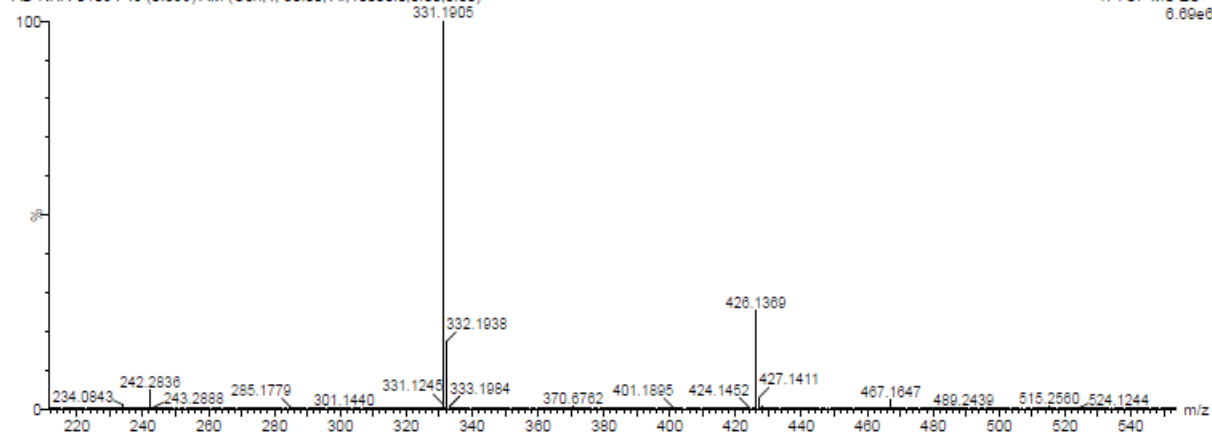

HRMS data of (+)-21

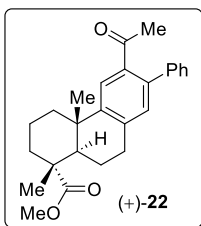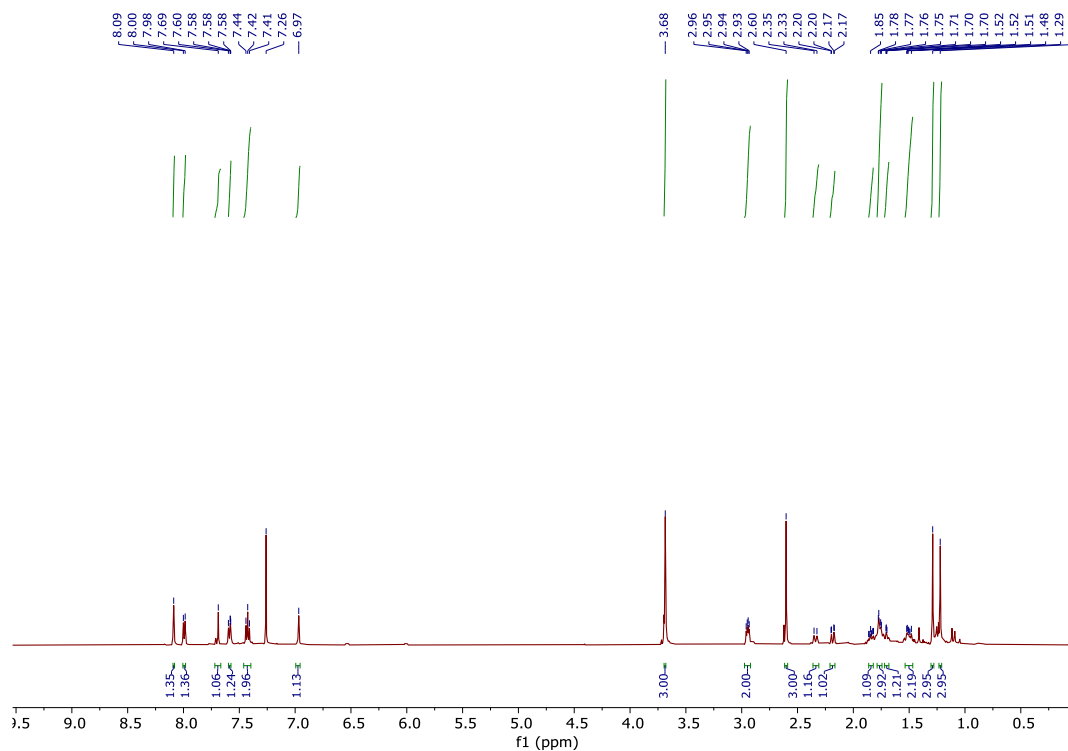

$^1\text{H NMR}$  (500 MHz,  $\text{CDCl}_3$ ) of (+)-22

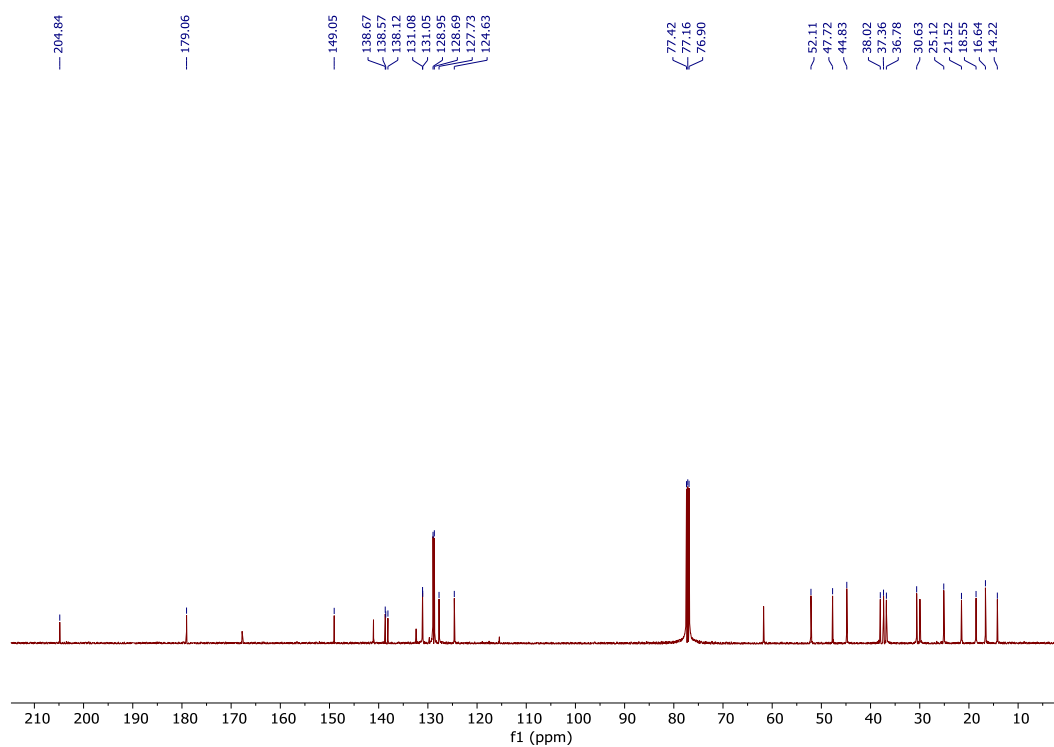

$^{13}\text{C NMR}$  (125 MHz,  $\text{CDCl}_3$ ) of (+)-22

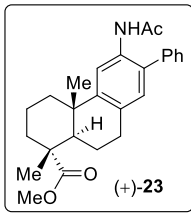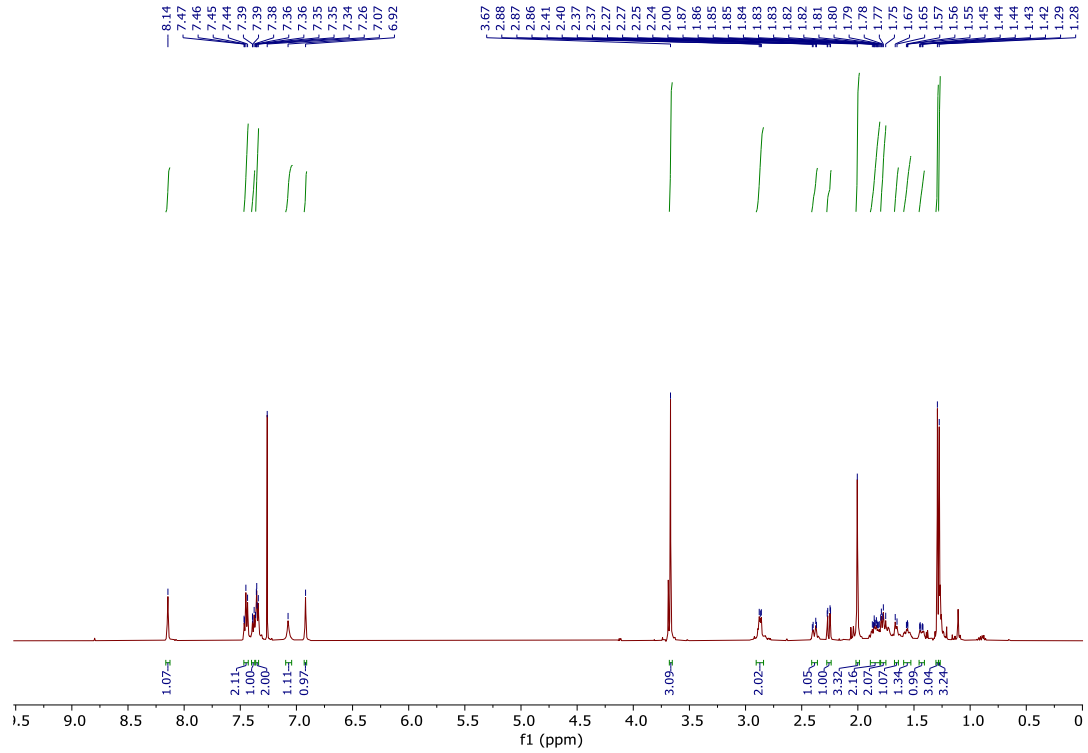

$^1\text{H NMR}$  (500 MHz,  $\text{CDCl}_3$ ) of (+)-23

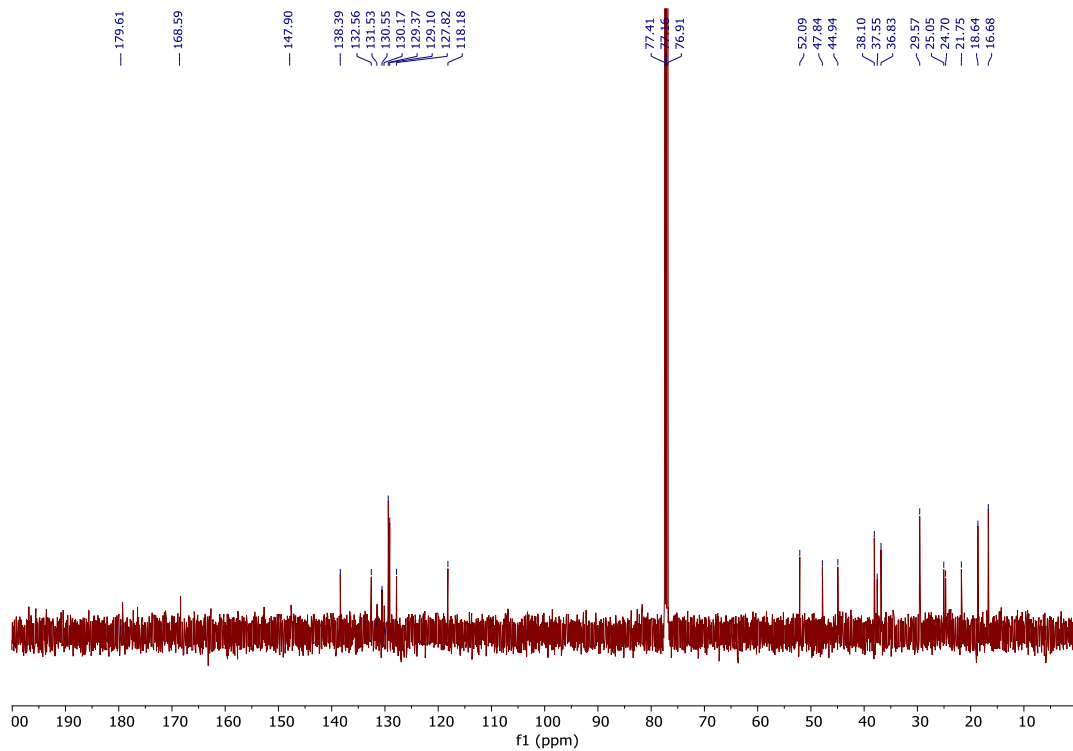

$^{13}\text{C NMR}$  (125 MHz,  $\text{CDCl}_3$ ) of (+)-23

# Display Report

## Analysis Info

Analysis Name D:\Data\User data\2022\MAR\lab\_mm\_01\_322.d  
Method Tune\_pos\_Standard.m  
Sample Name ab\_mm\_01\_322  
Comment signal dropping issue

Acquisition Date 3/21/2022 1:07:47 PM

Operator IISER Kolkata  
Instrument maXis Impact 8282001.00127

## Acquisition Parameter

|             |          |                      |          |                  |           |
|-------------|----------|----------------------|----------|------------------|-----------|
| Source Type | ESI      | Ion Polarity         | Positive | Set Nebulizer    | 0.5 Bar   |
| Focus       | Active   | Set Capillary        | 3400 V   | Set Dry Heater   | 200 °C    |
| Scan Begin  | 50 m/z   | Set End Plate Offset | -500 V   | Set Dry Gas      | 4.0 l/min |
| Scan End    | 1000 m/z | Set Charging Voltage | 2000 V   | Set Divert Valve | Source    |
|             |          | Set Corona           | 0 nA     | Set APCI Heater  | 0 °C      |

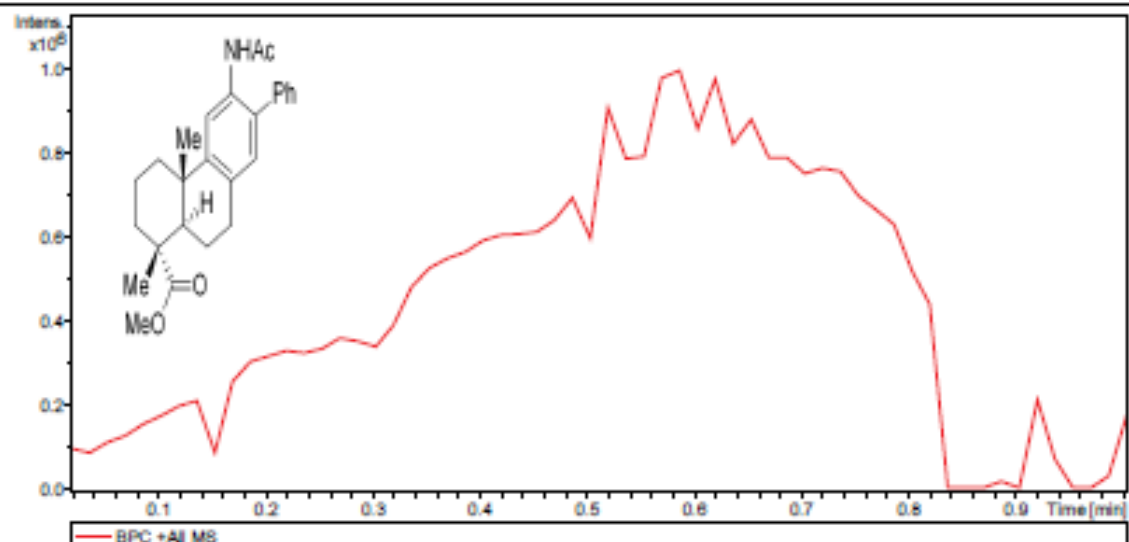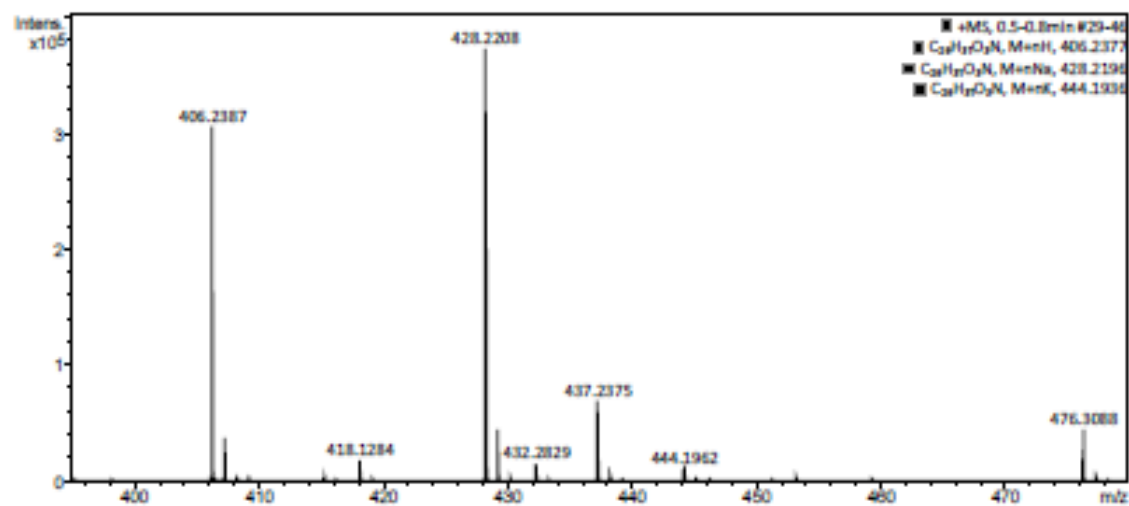

ab\_mm\_01\_322.d

Bruker Compass DataAnalysis 4.1

printed: 3/21/2022 1:10:25 PM

by: IISER Kolkata

Page 1 of 1

HRMS data of (+)-23

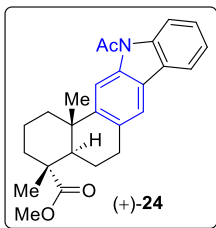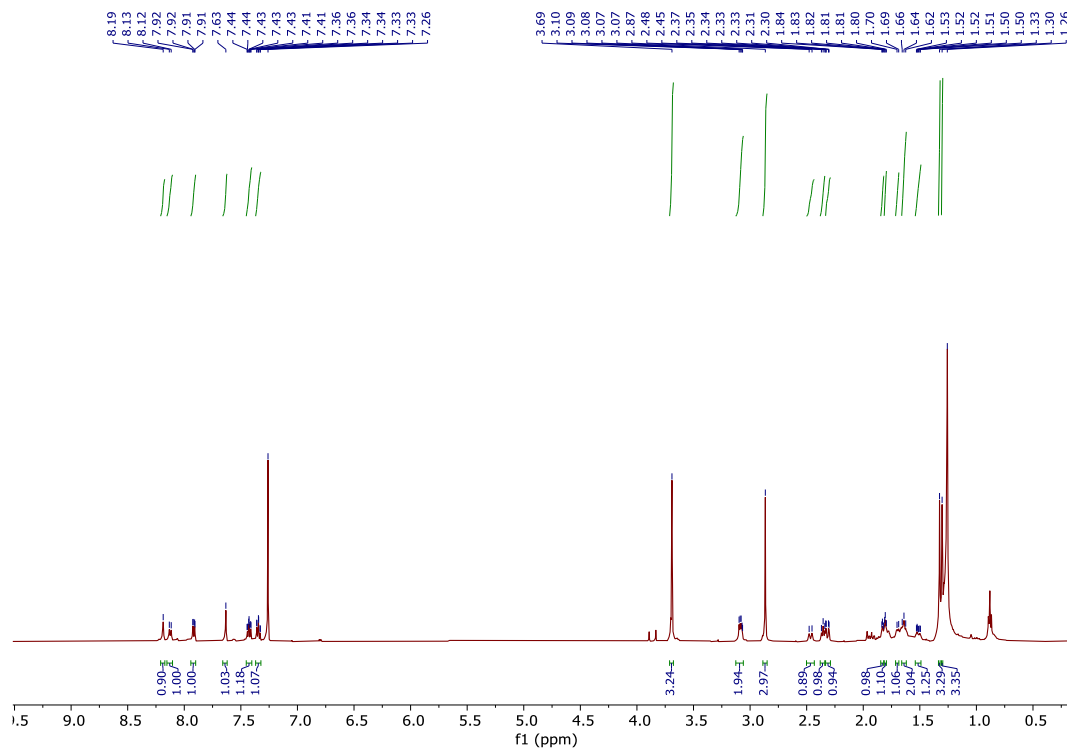

$^1\text{H NMR}$  (500 MHz,  $\text{CDCl}_3$ ) of (+)-24

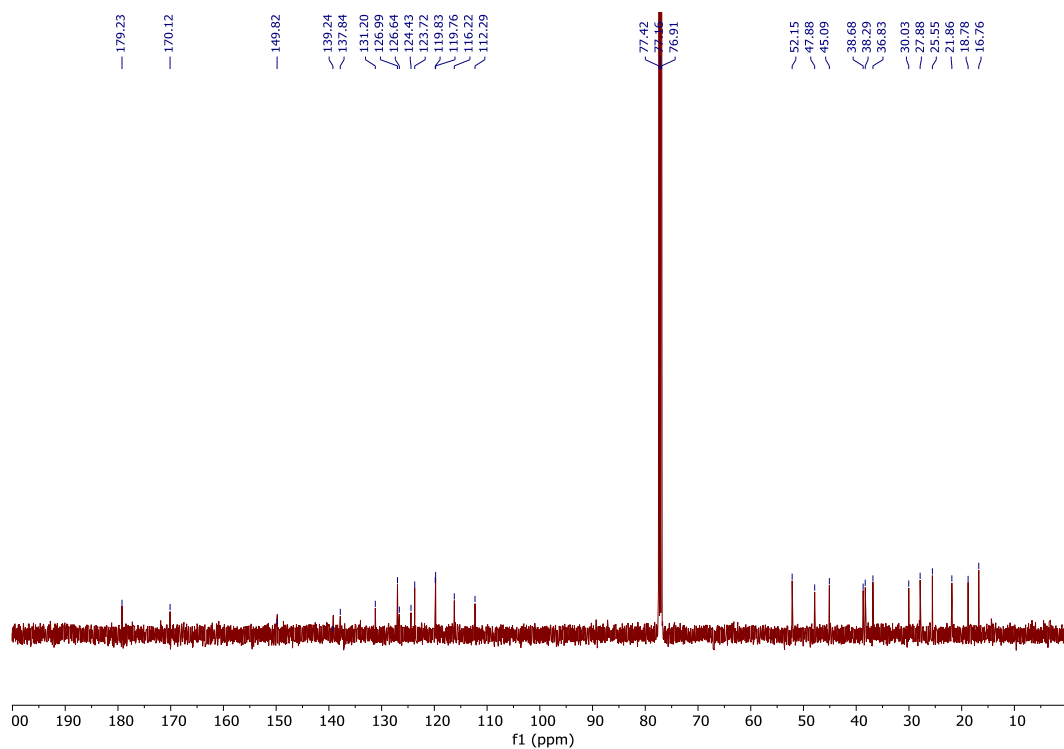

$^{13}\text{C NMR}$  (125 MHz,  $\text{CDCl}_3$ ) of (+)-24

## Display Report

|                      |                                                                                   |                         |                      |
|----------------------|-----------------------------------------------------------------------------------|-------------------------|----------------------|
| <b>Analysis Info</b> |                                                                                   | <b>Acquisition Date</b> | 4/19/2022 4:37:06 PM |
| <b>Analysis Name</b> | D:\Data\NEW USER DATA 2022\Apr-2022\19-apr\Prof.A.Bisai-ABMM2324_1-A_4_01_11781.d | <b>Operator</b>         | RUCHI                |
| <b>Method</b>        | hrlcms-20 sept.m                                                                  | <b>Instrument</b>       | micrOTOF-Q II 10330  |
| <b>Sample Name</b>   | Prof.A.Bisai-ABMM2324                                                             |                         |                      |
| <b>Comment</b>       |                                                                                   |                         |                      |

### Acquisition Parameter

|             |          |                       |           |                 |           |
|-------------|----------|-----------------------|-----------|-----------------|-----------|
| Source Type | ESI      | Ion Polarity          | Positive  | Set Nebulizer   | 1.2 Bar   |
| Focus       | Active   | Set Capillary         | 4500 V    | Set Dry Heater  | 200 °C    |
| Scan Begin  | 50 m/z   | Set End Plate Offset  | -500 V    | Set Dry Gas     | 6.0 l/min |
| Scan End    | 3000 m/z | Set Collision Cell RF | 130.0 Vpp | Set Diver Valve | Waste     |

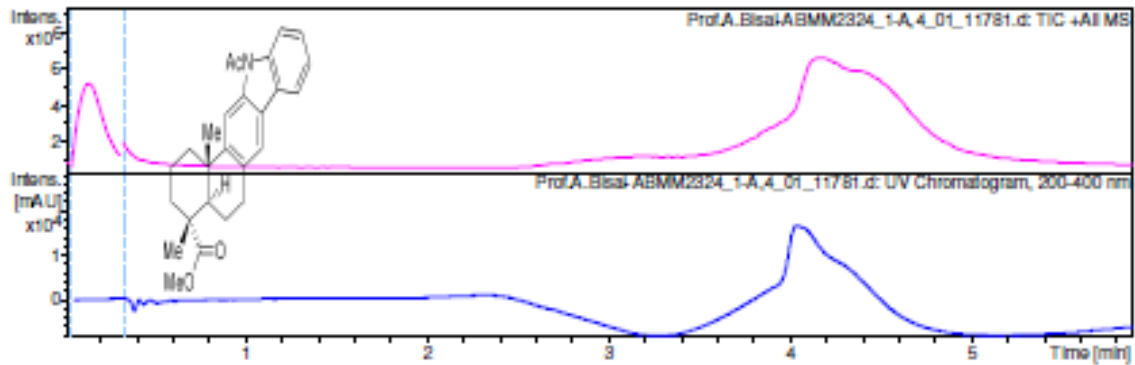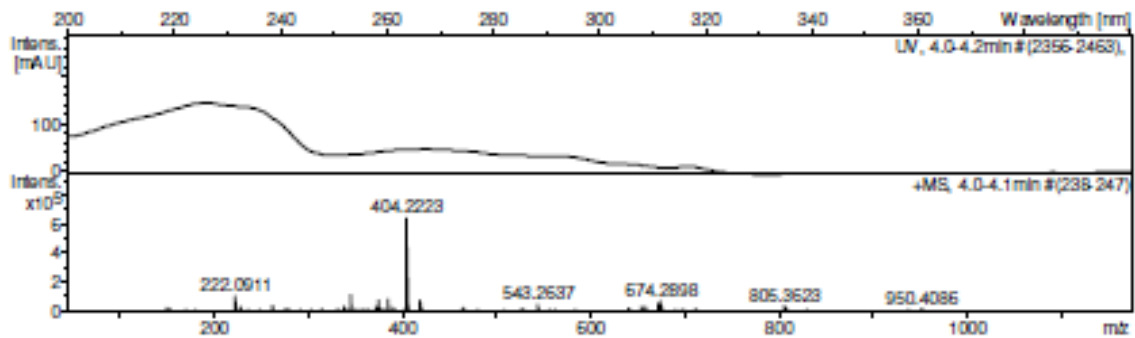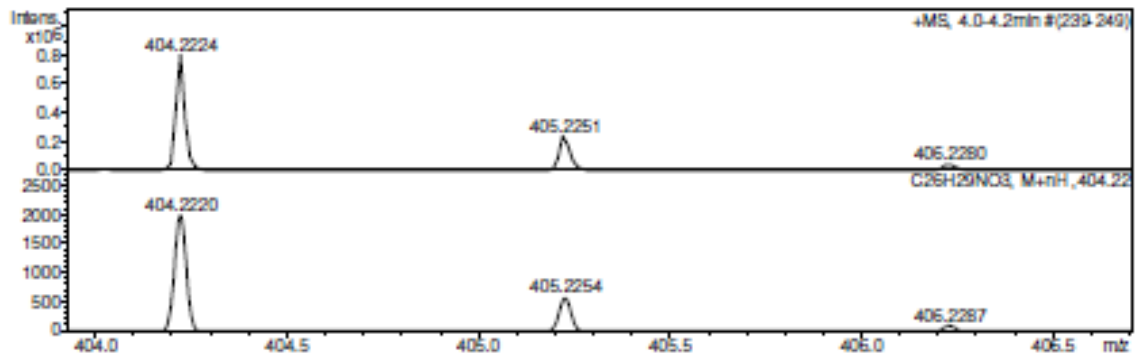

HRMS data of (+)-24



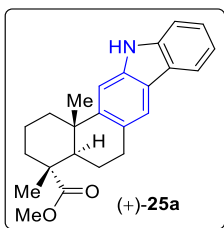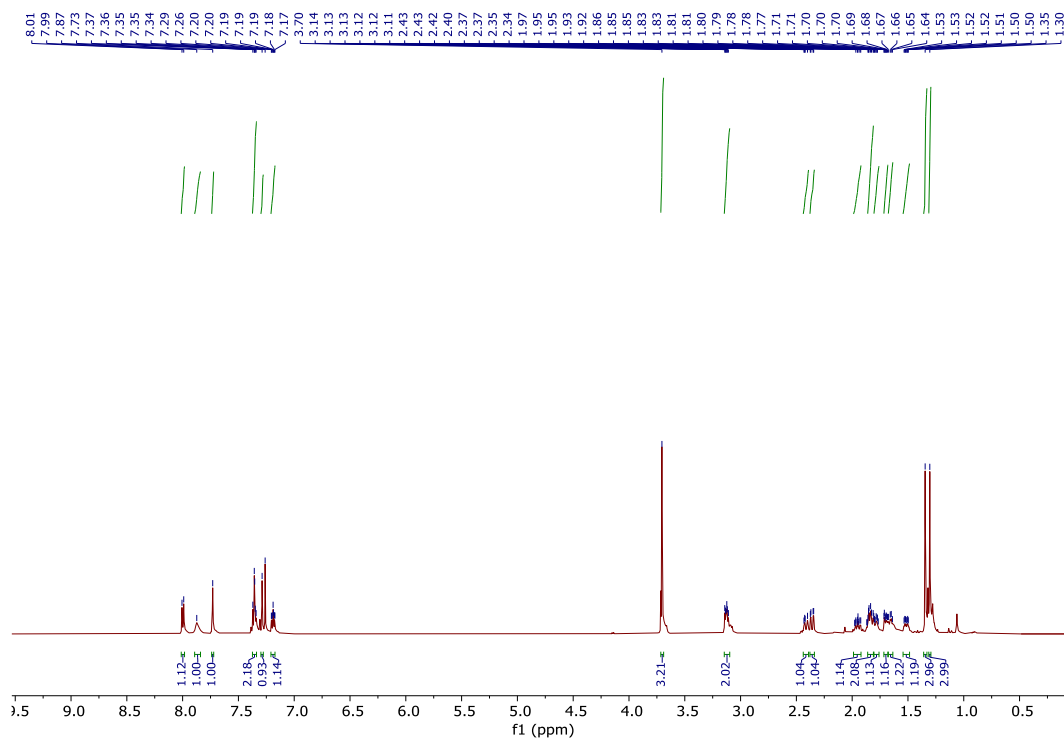

**<sup>1</sup>H NMR (500 MHz, CDCl<sub>3</sub>) of (+)-25a**

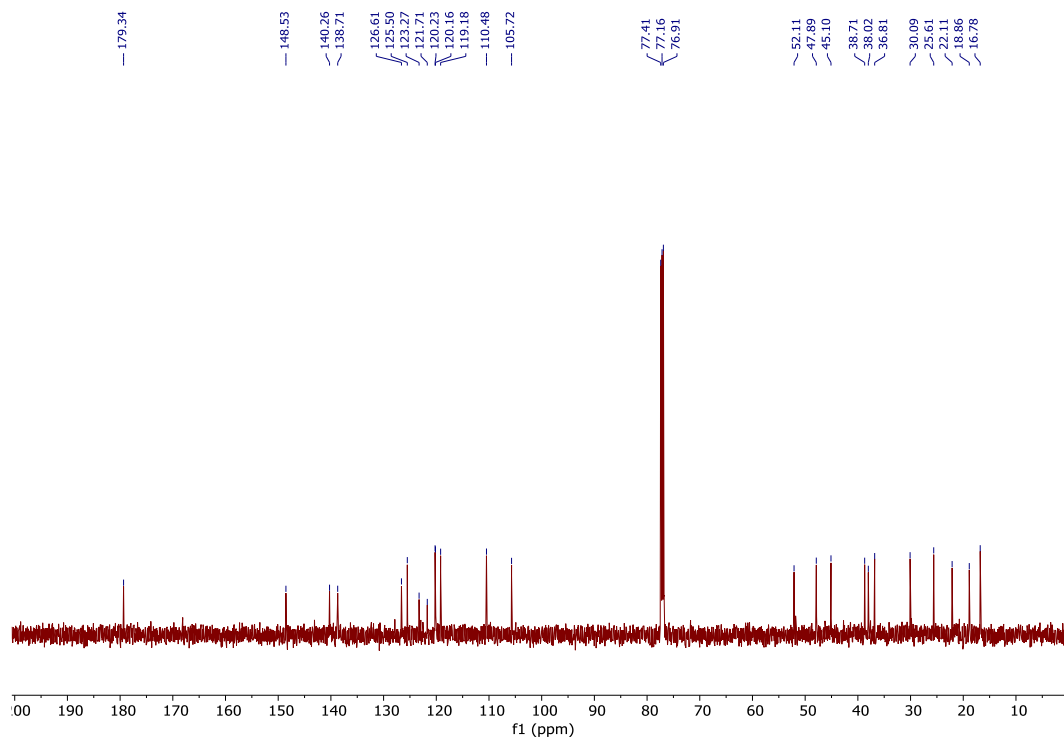

**<sup>13</sup>C NMR (125 MHz, CDCl<sub>3</sub>) of (+)-25a**

AB  
AB-MM-02-051 (1.102) Is (1.00,1.00) C<sub>24</sub>H<sub>28</sub>NO<sub>2</sub>

1: TOF MS ES+  
7.63e12

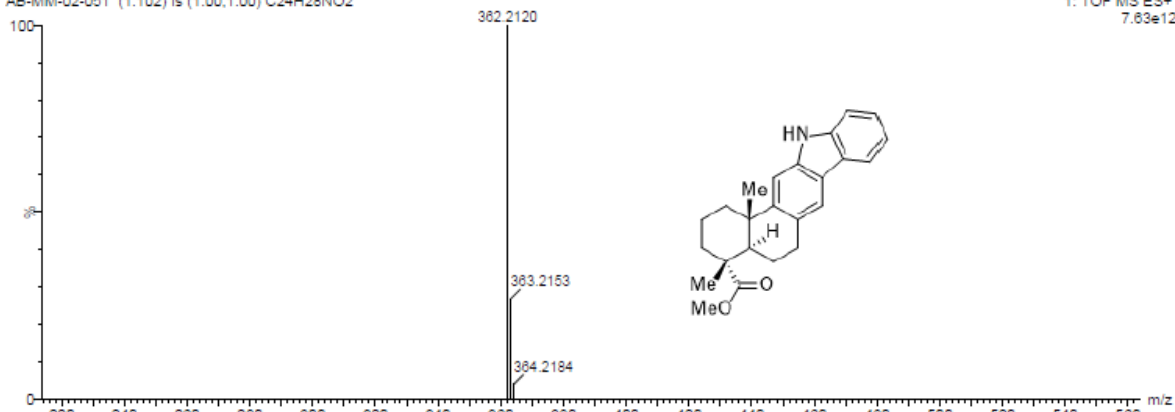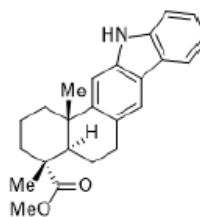

AB-MM-02-051 56 (1.102) AM (Cen.4, 80.00, Ar.10000.0.0.00.0.00)

1: TOF MS ES+  
4.19e8

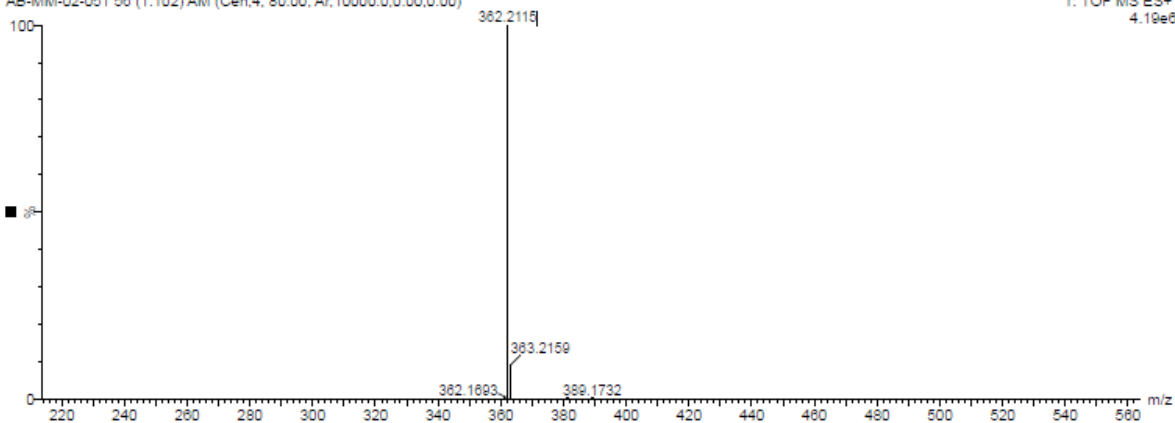

HRMS data of (+)-25a

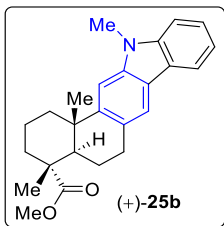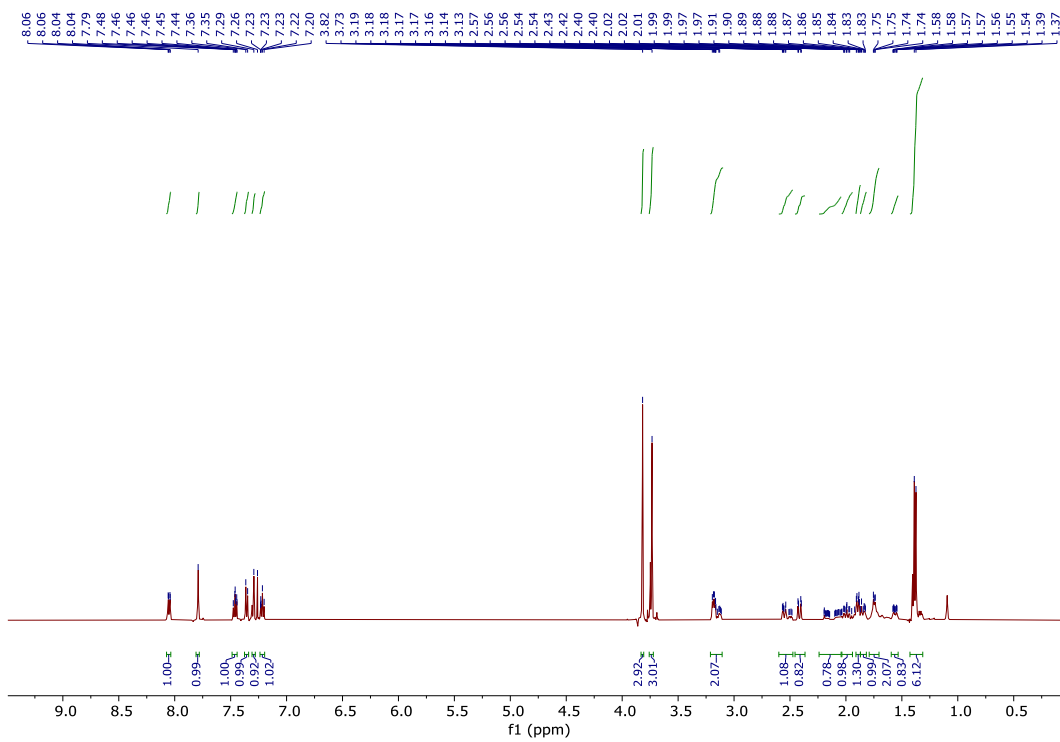

<sup>1</sup>H NMR (500 MHz, CDCl<sub>3</sub>) of (+)-25b

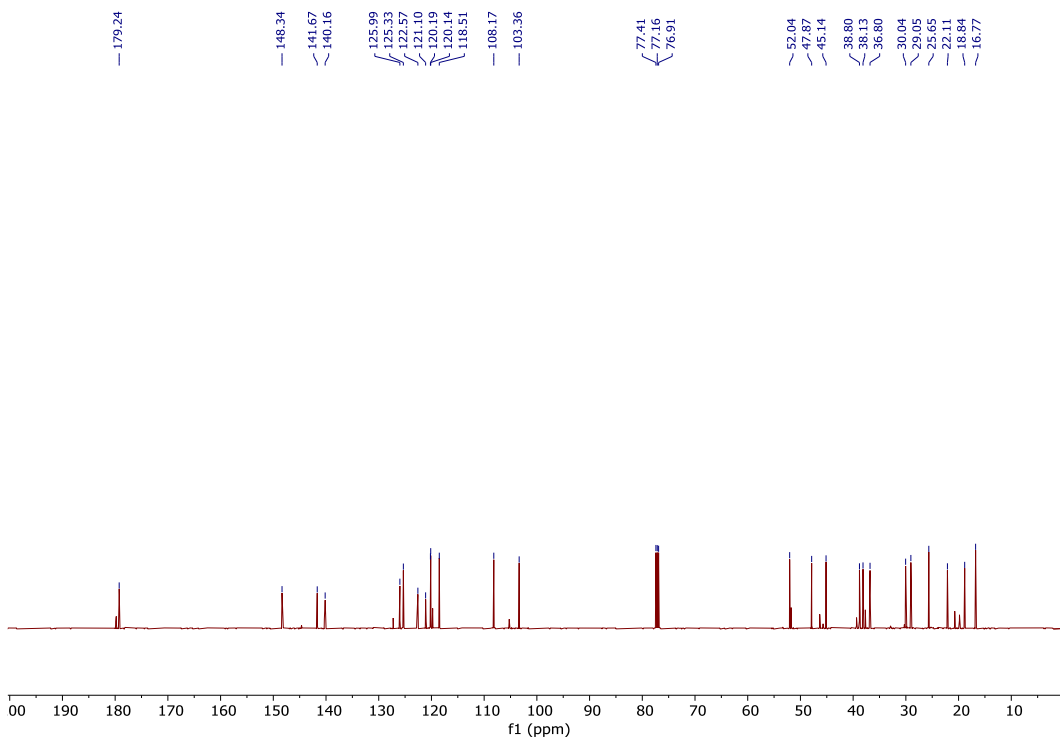

<sup>13</sup>C NMR (125 MHz, CDCl<sub>3</sub>) of (+)-25b

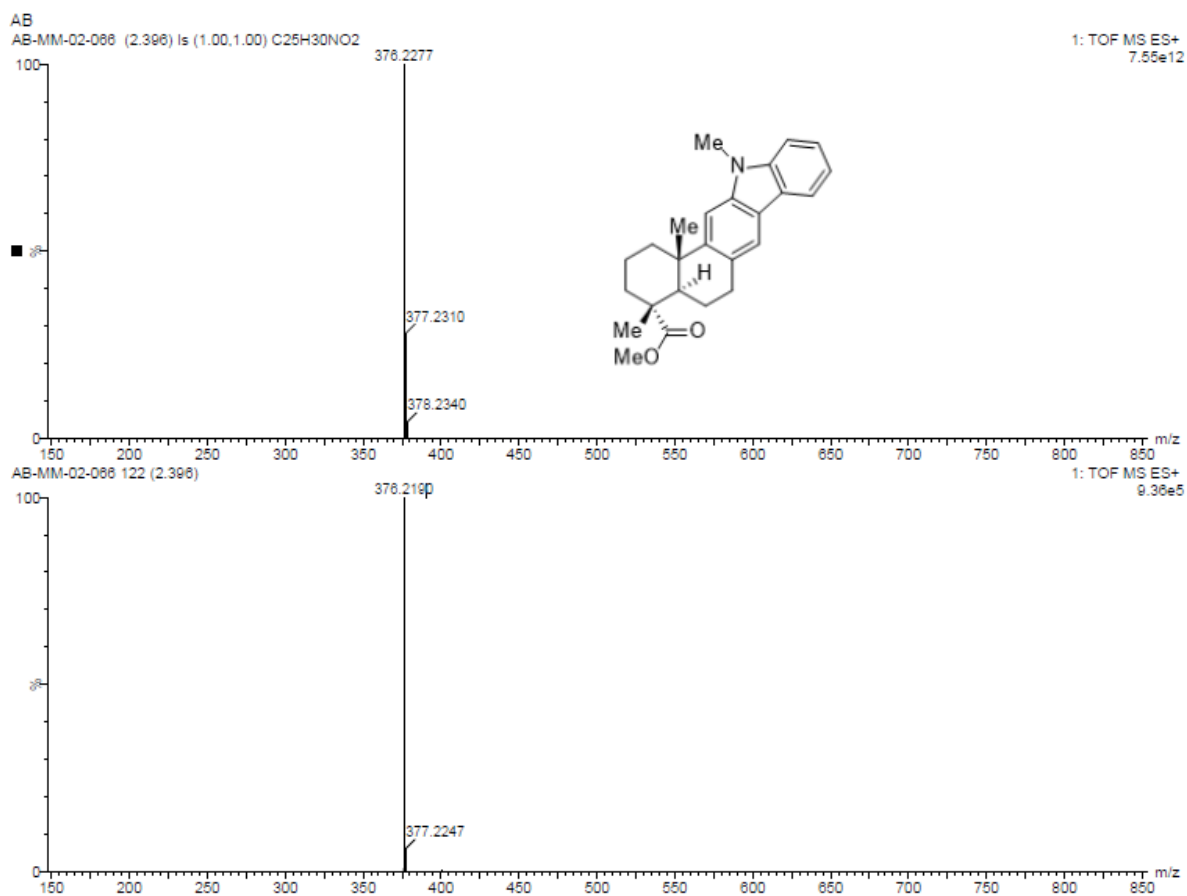

HRMS data of (+)-25b



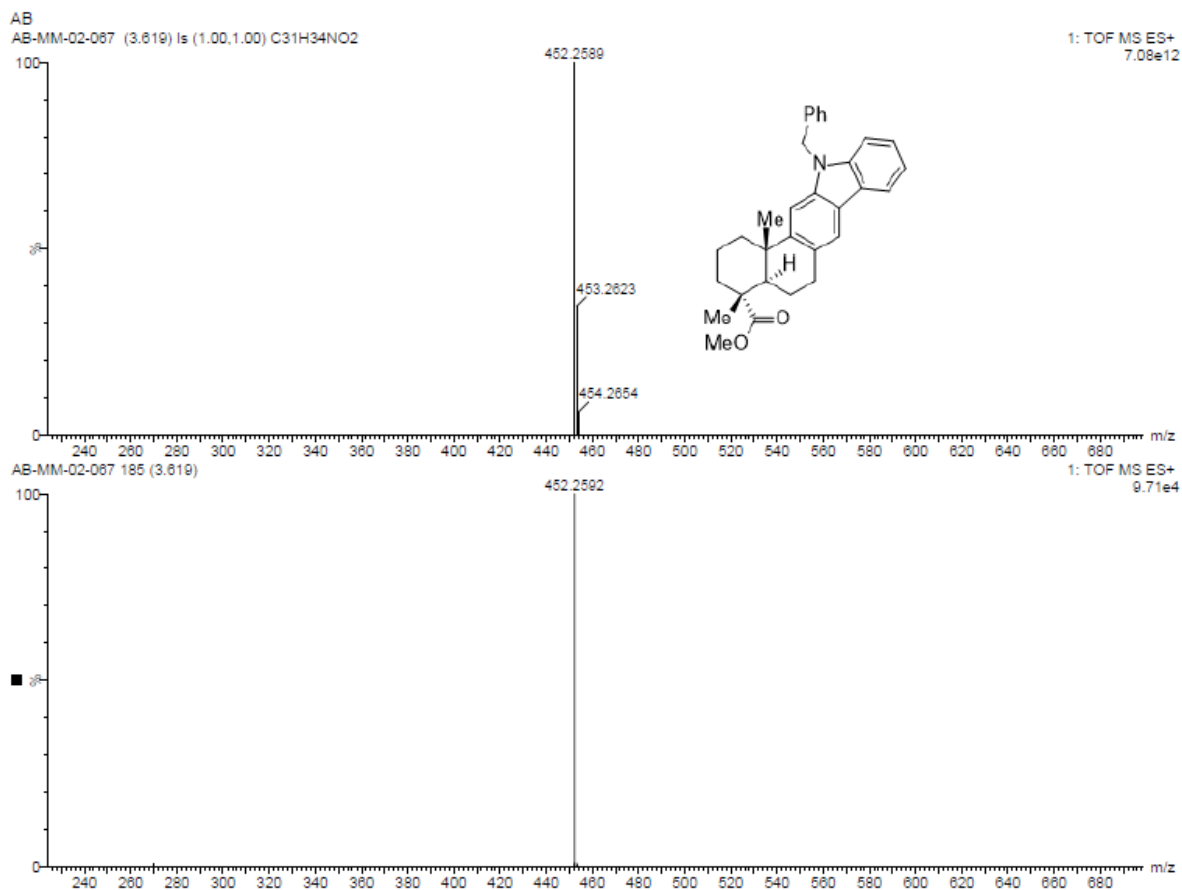

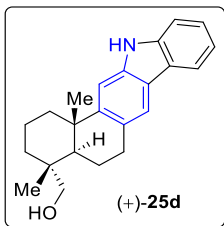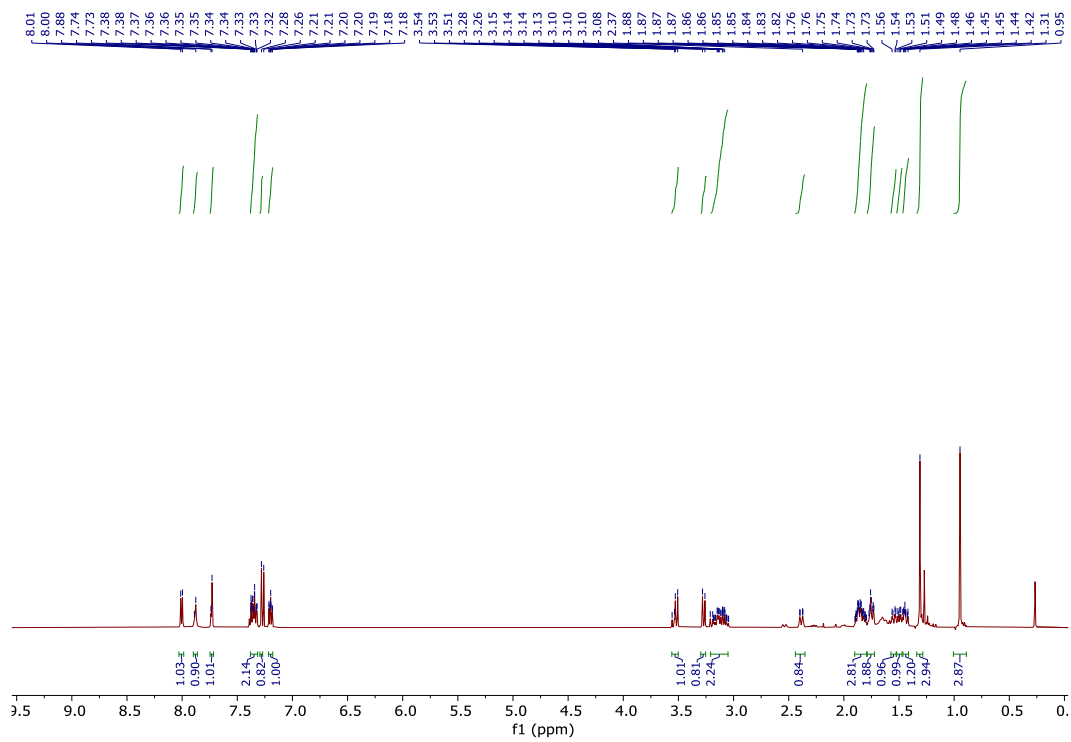

**<sup>1</sup>H NMR (500 MHz, CDCl<sub>3</sub>) of (+)-25d**

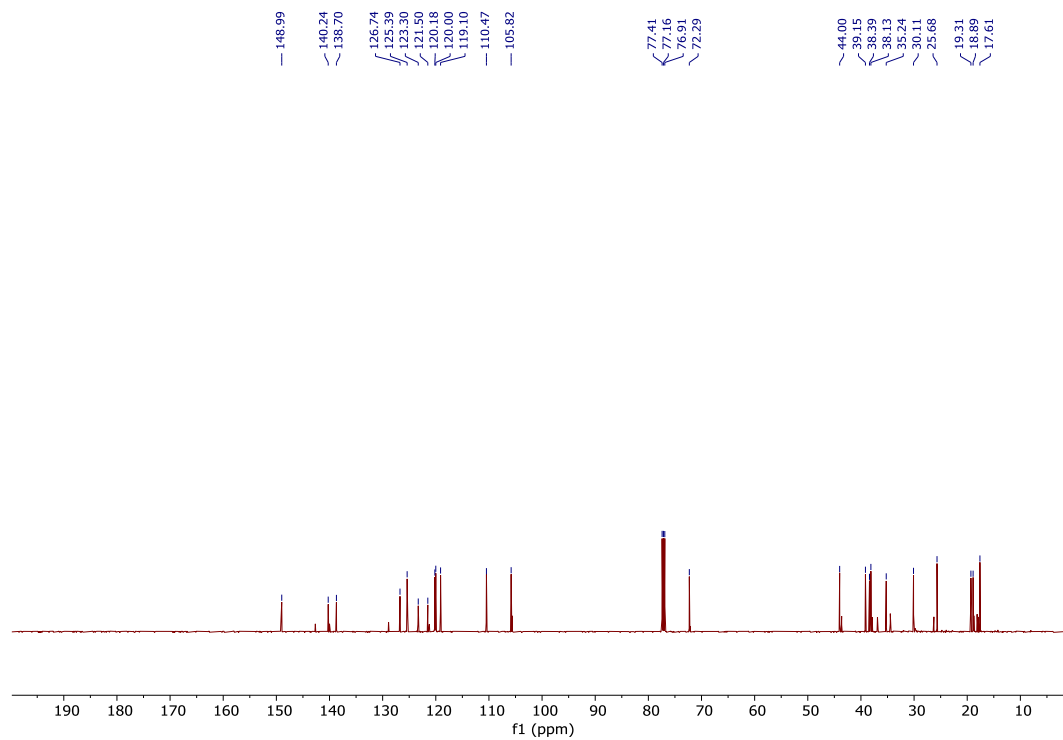

**<sup>13</sup>C NMR (125 MHz, CDCl<sub>3</sub>) of (+)-25d**

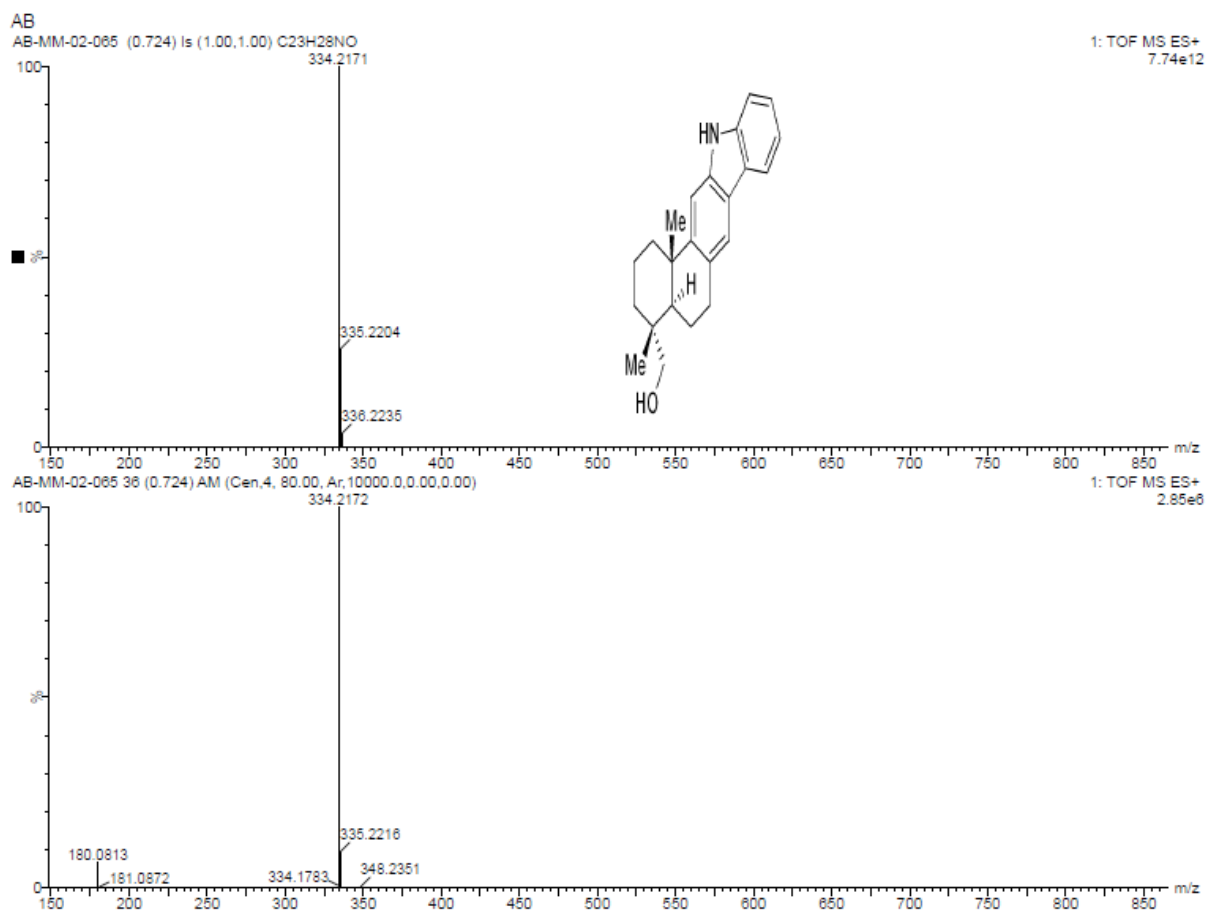

HRMS data of (+)-25d



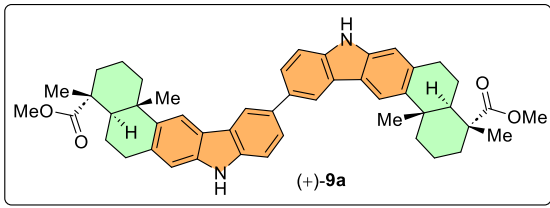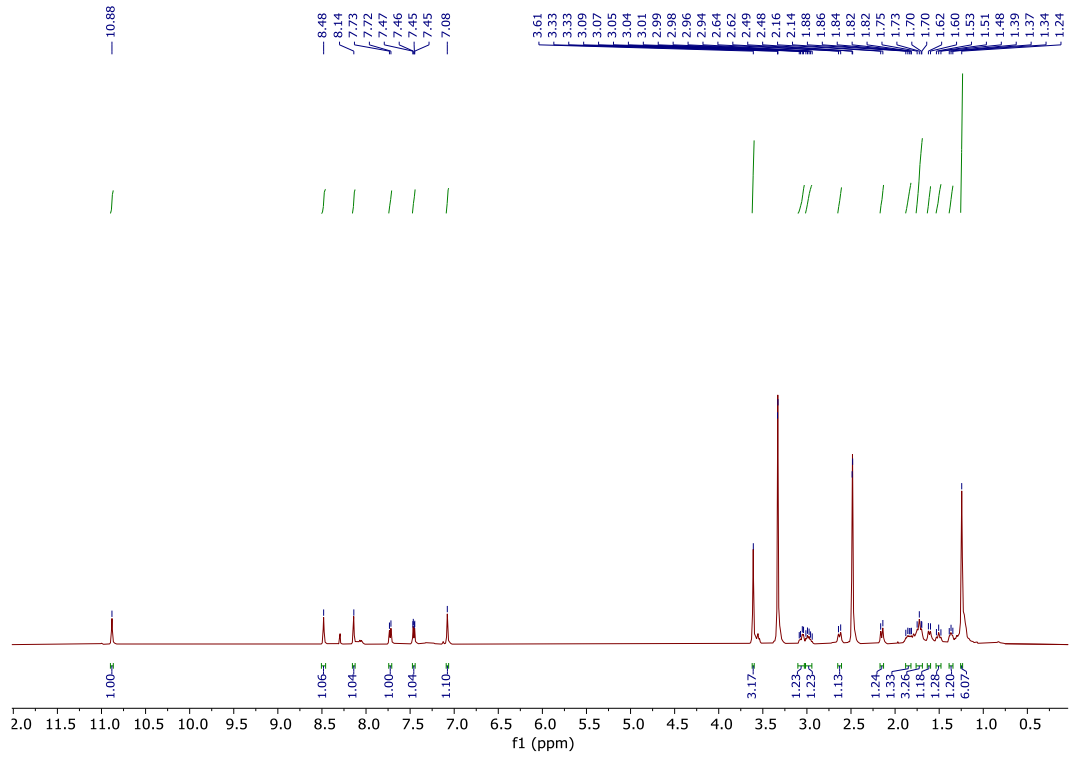

<sup>1</sup>H NMR (500 MHz, DMSO) of (+)-9a

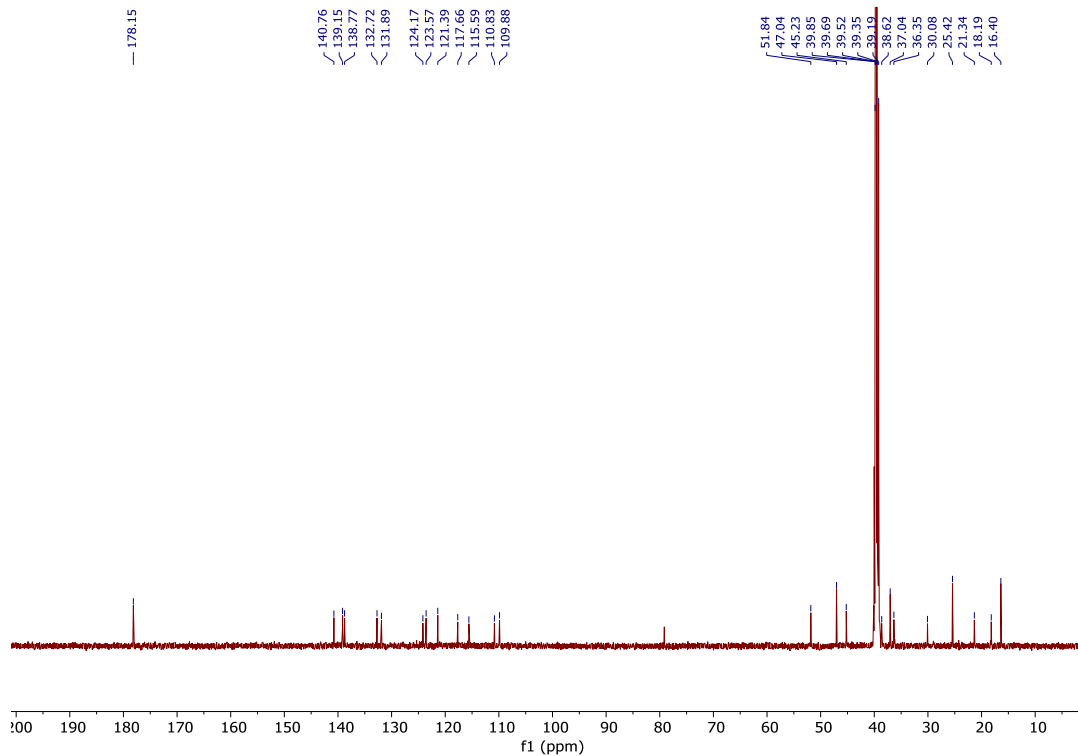

<sup>13</sup>C NMR (125 MHz, DMSO) of (+)-9a

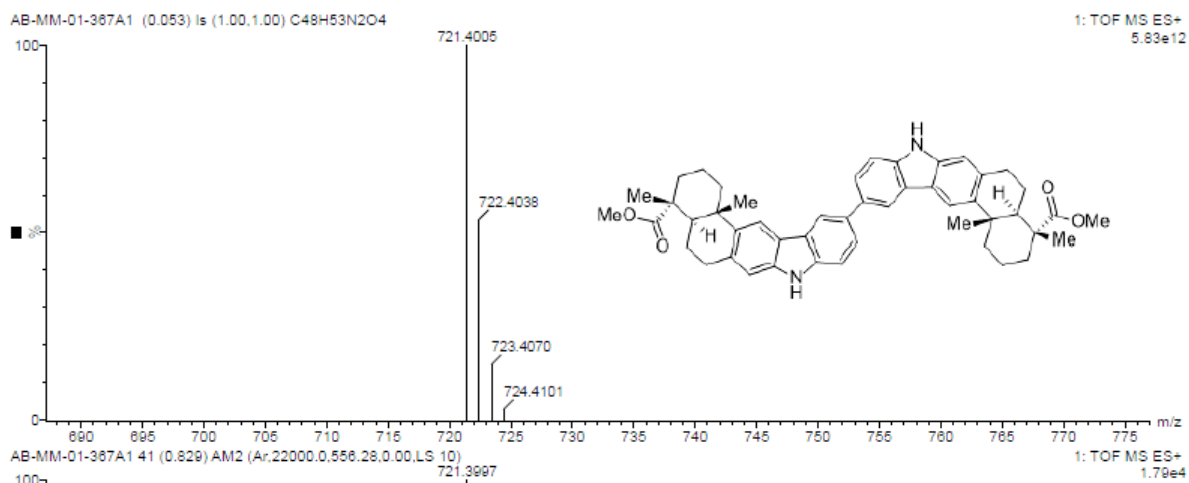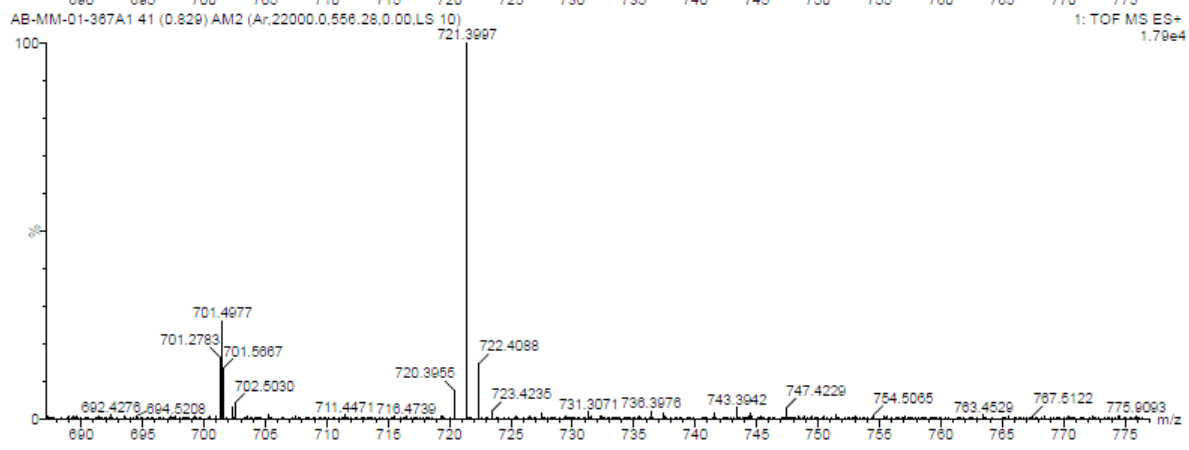

HRMS data of (+)-9a

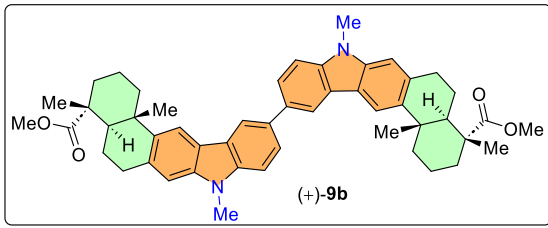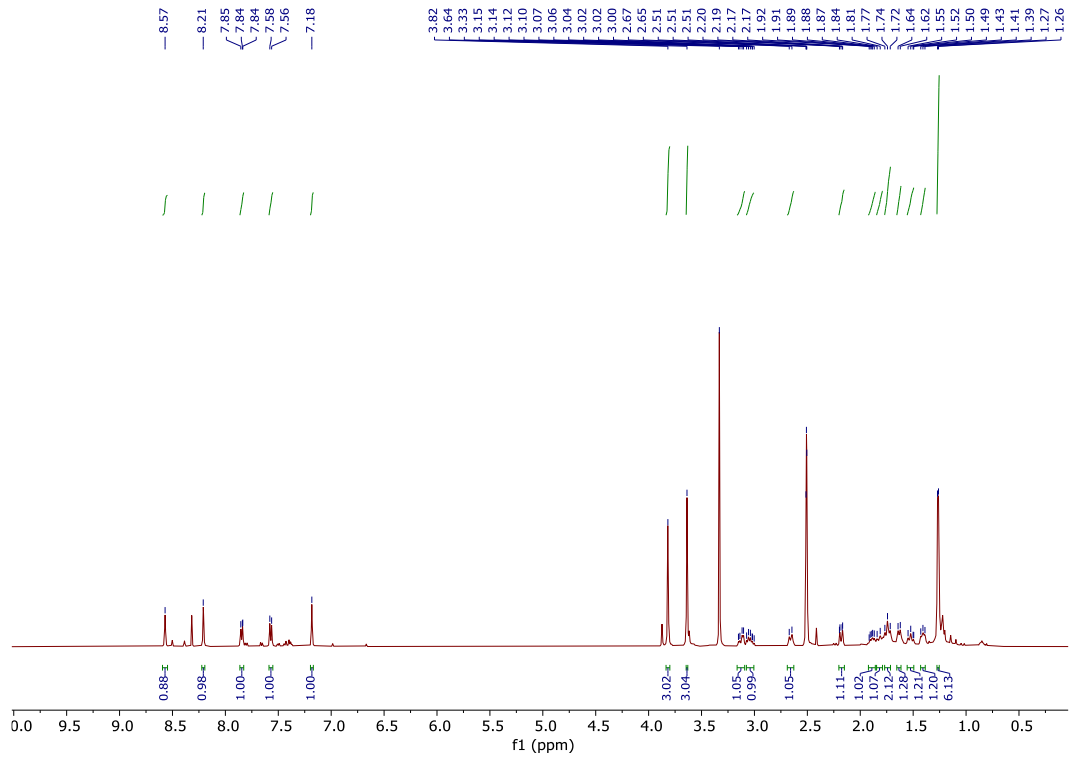

<sup>1</sup>H NMR (500 MHz, DMSO) of (+)-9b

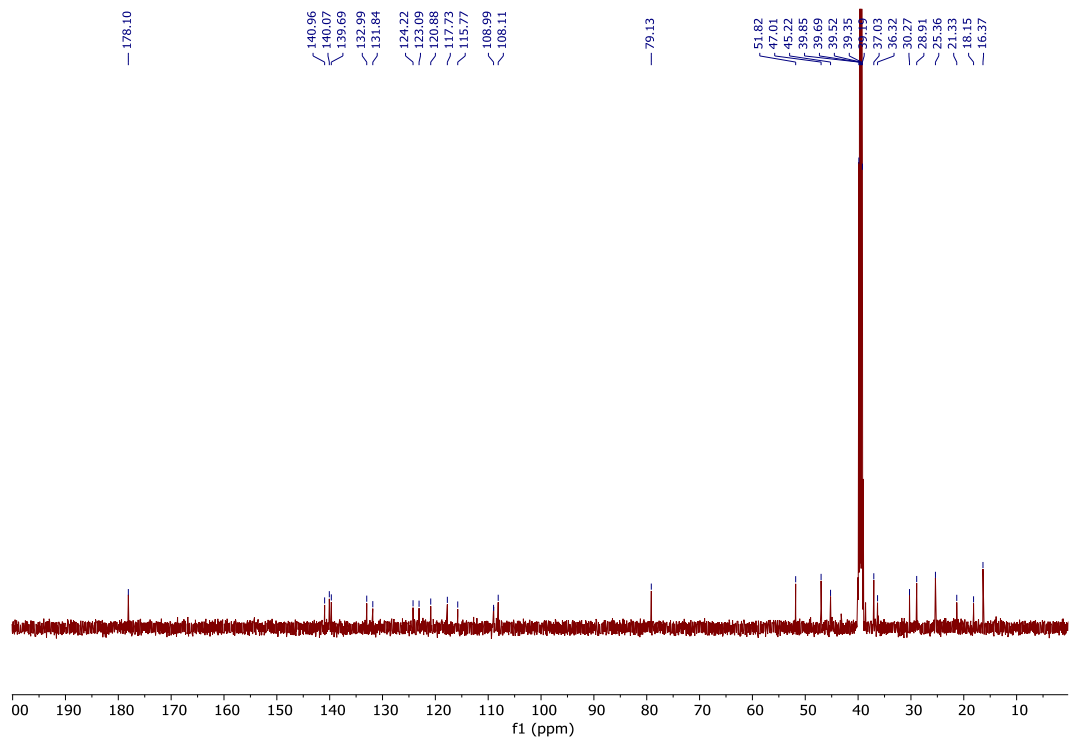

<sup>13</sup>C NMR (125 MHz, DMSO) of (+)-9b

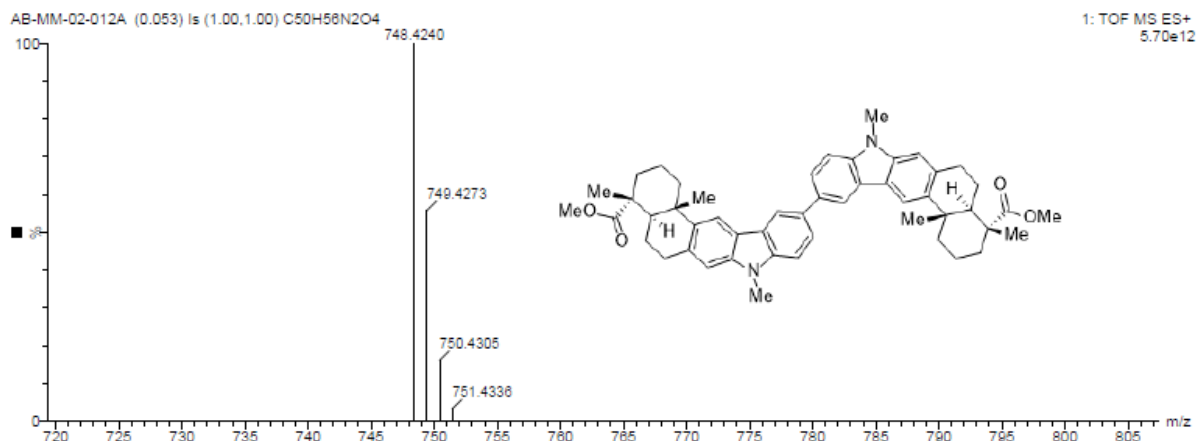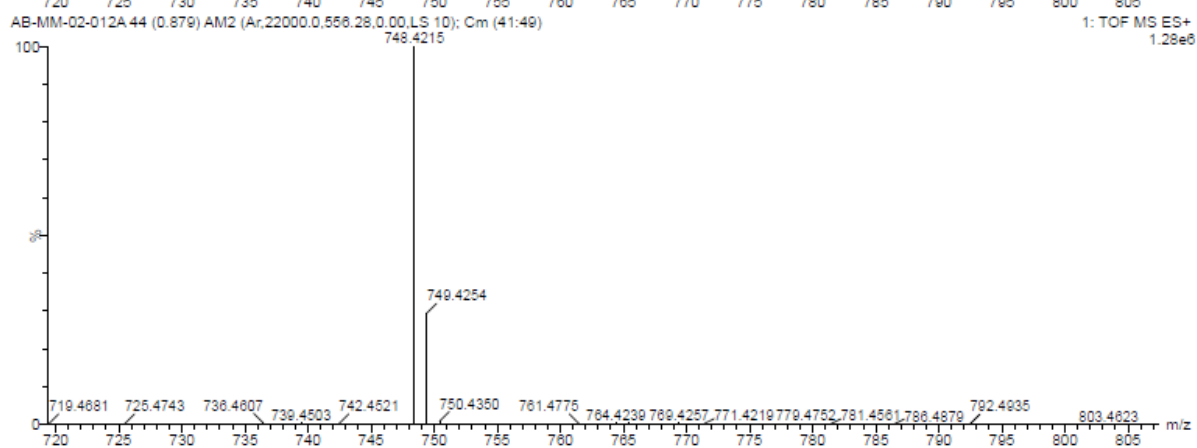

HRMS data of (+)-9b

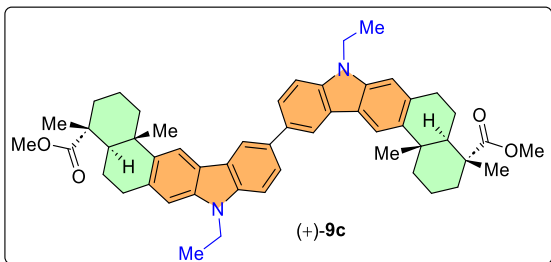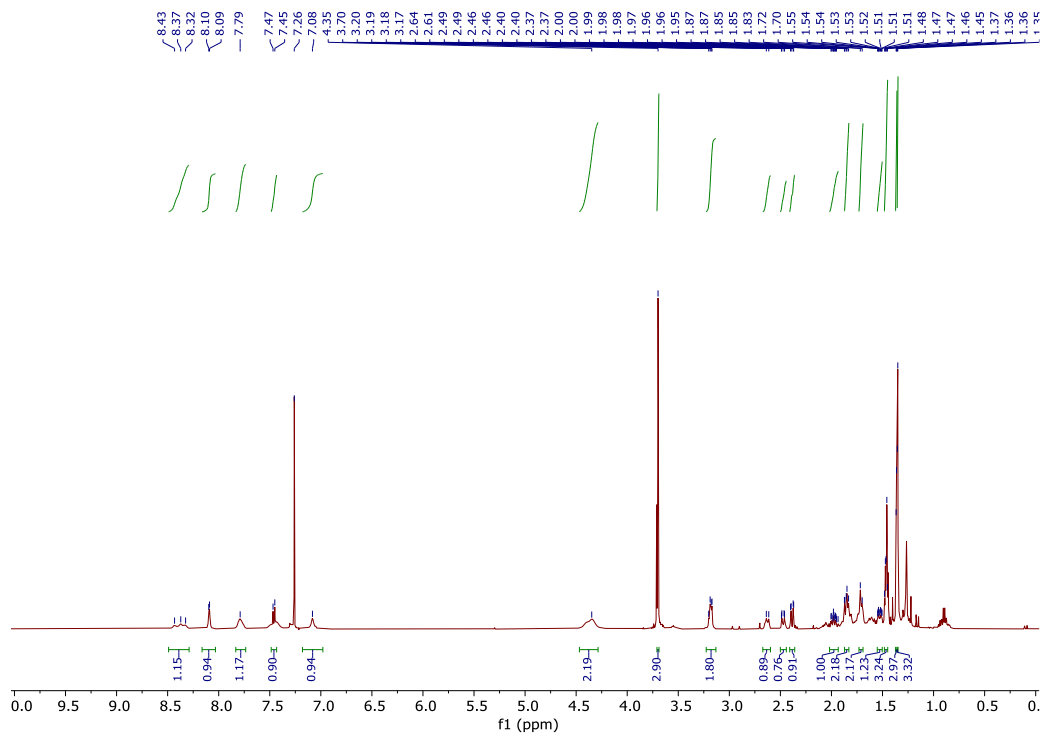

$^1\text{H}$  NMR (500 MHz,  $\text{CDCl}_3$ ) of (+)-**9c**

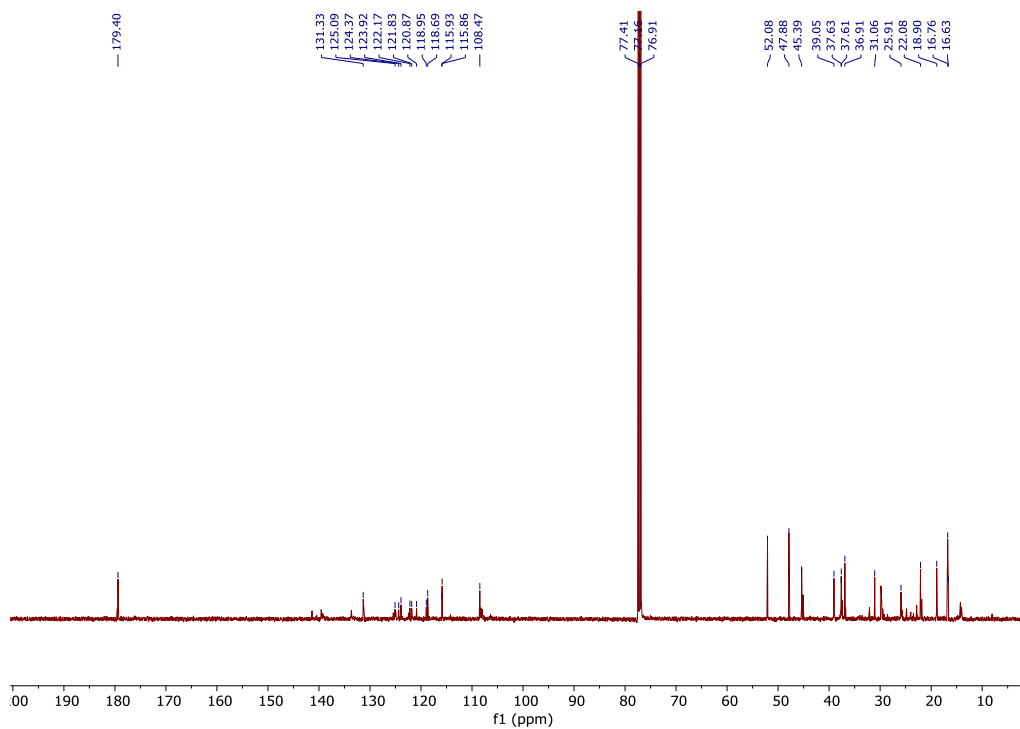

$^{13}\text{C}$  NMR (125 MHz,  $\text{CDCl}_3$ ) of (+)-**9c**

AB-MM-02-088B1 (0.053) Is (1.00,1.00) C<sub>52</sub>H<sub>60</sub>N<sub>2</sub>O<sub>4</sub>

1: TOF MS ES+  
5.58e12

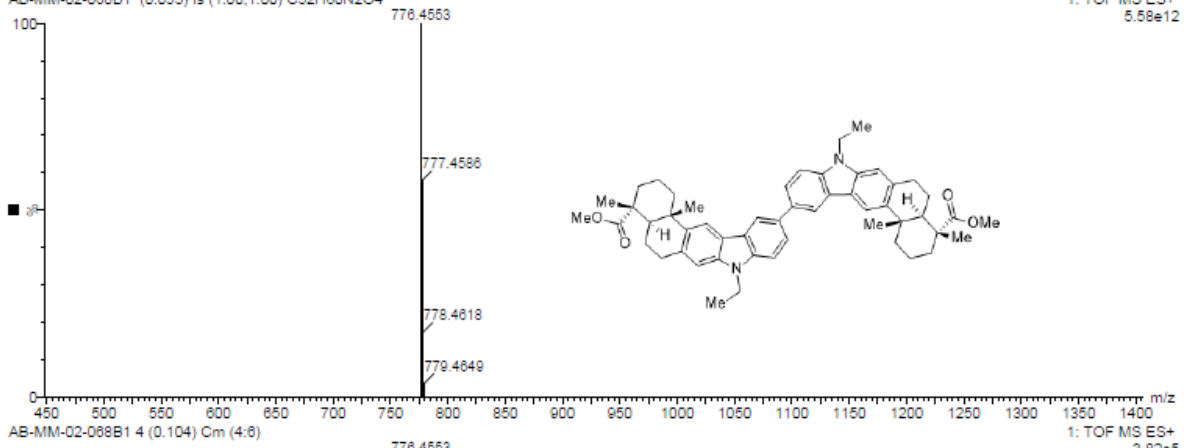

AB-MM-02-088B1 4 (0.104) Cm (4:8)

1: TOF MS ES+  
3.82e5

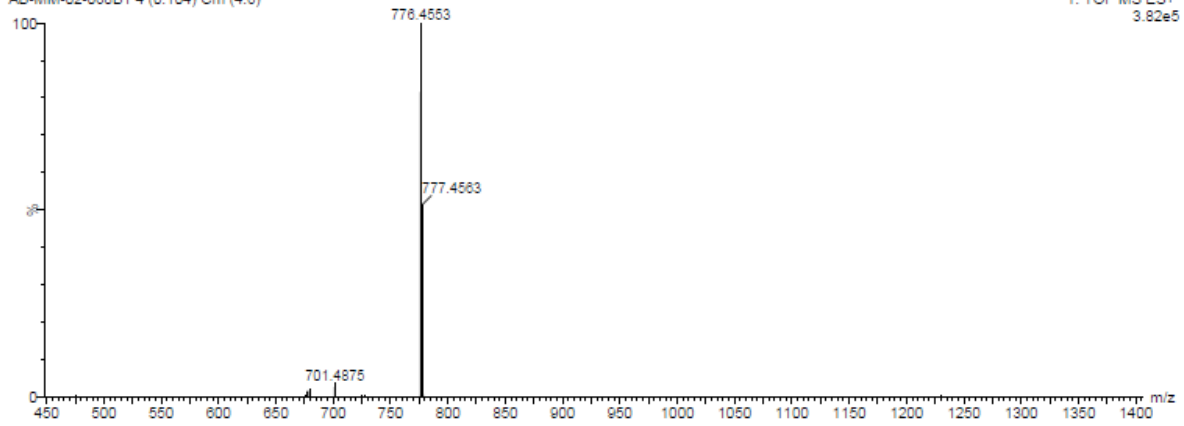

HRMS data of (+)-9c

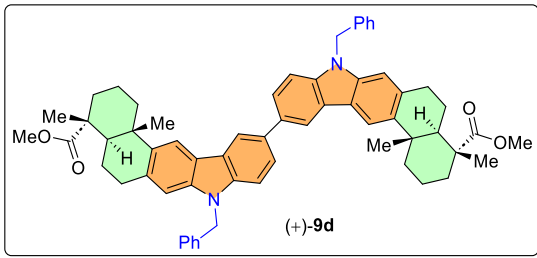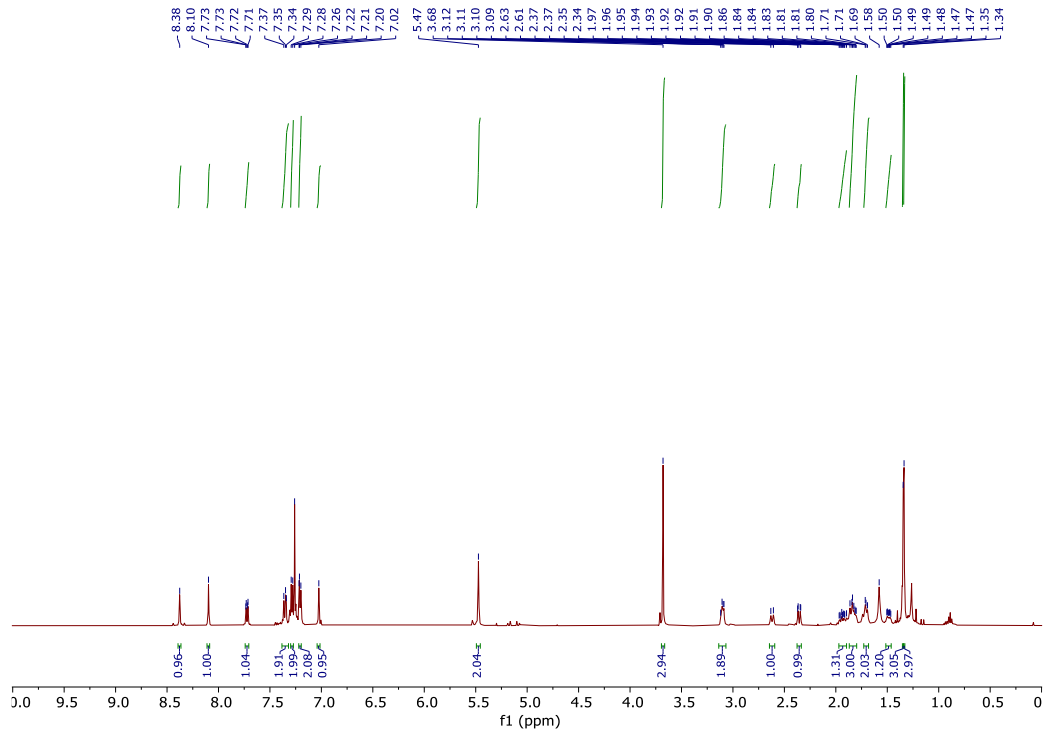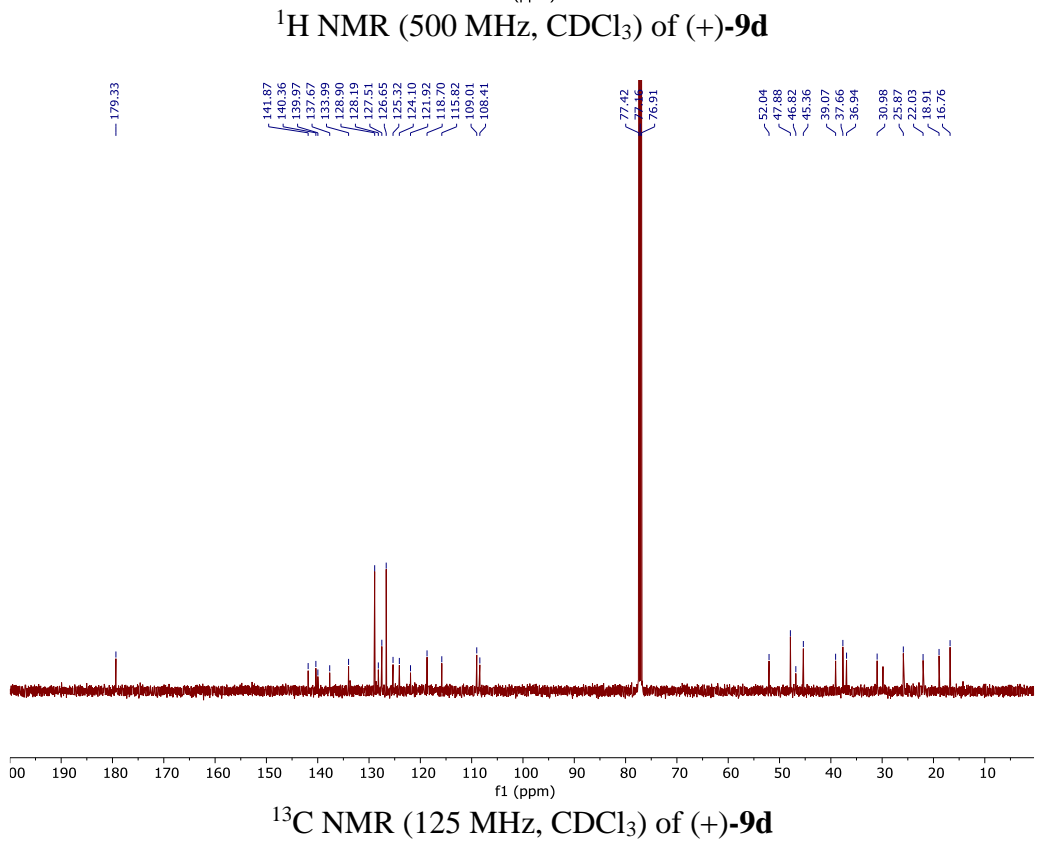

AB-MM-02-018A (0.053) Is (1.00,1.00) C62H65N2O4

1: TOF MS ES+  
5.01e12

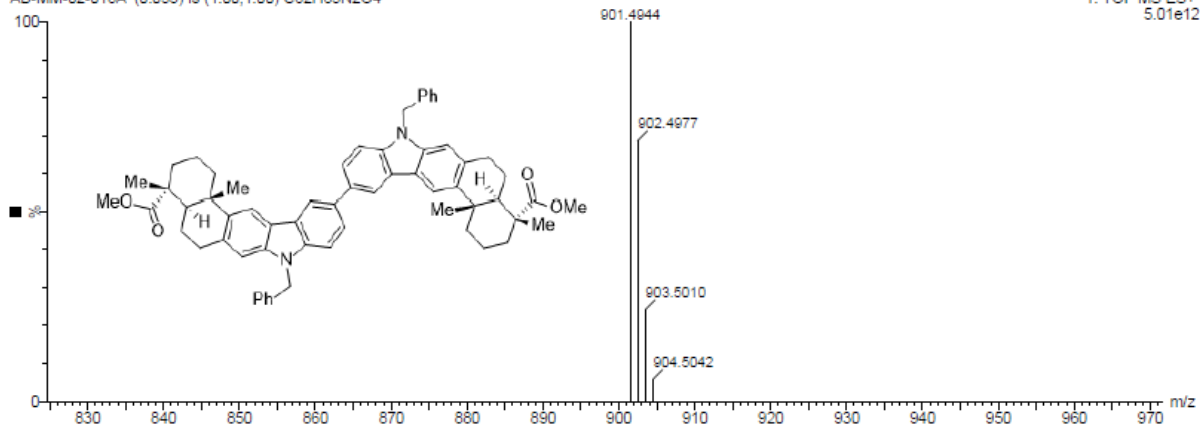

AB-MM-02-018A 41 (0.829) AM2 (Ar,22000.0,556.26,0.00,LS 10)

1: TOF MS ES+  
3.32e4

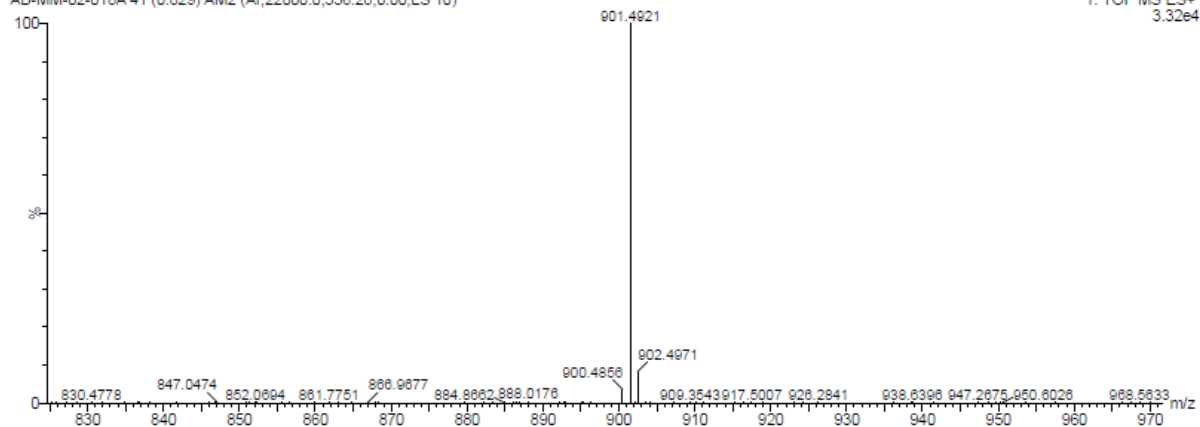

HRMS data of (+)-9d



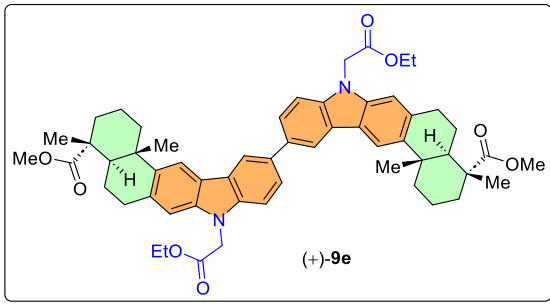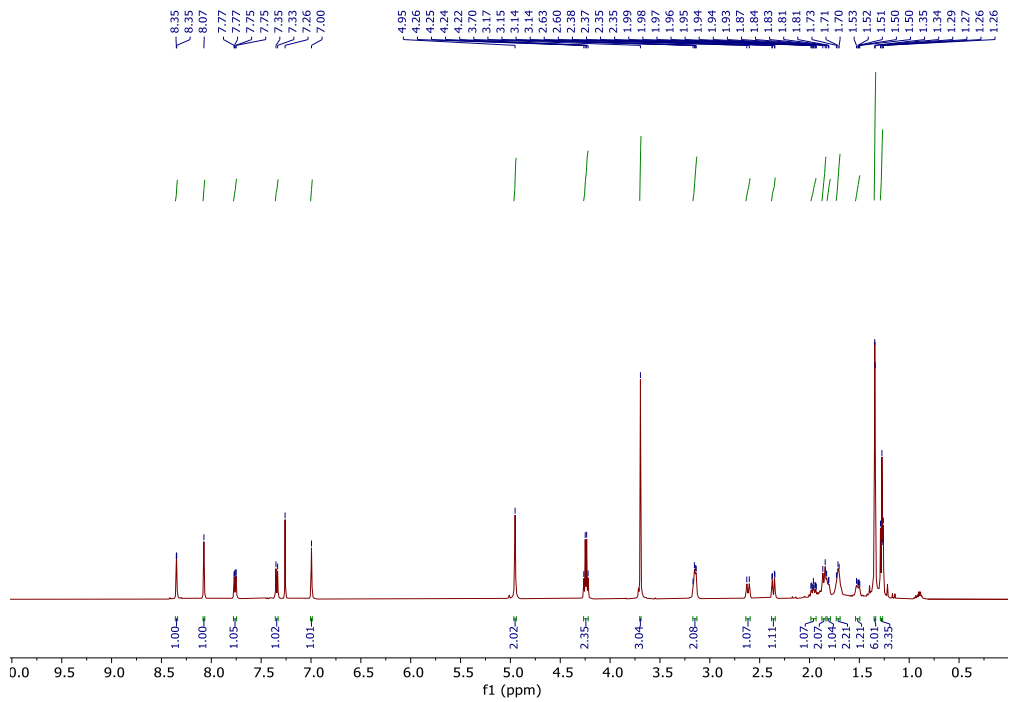

<sup>1</sup>H NMR (500 MHz, CDCl<sub>3</sub>) of (+)-9e

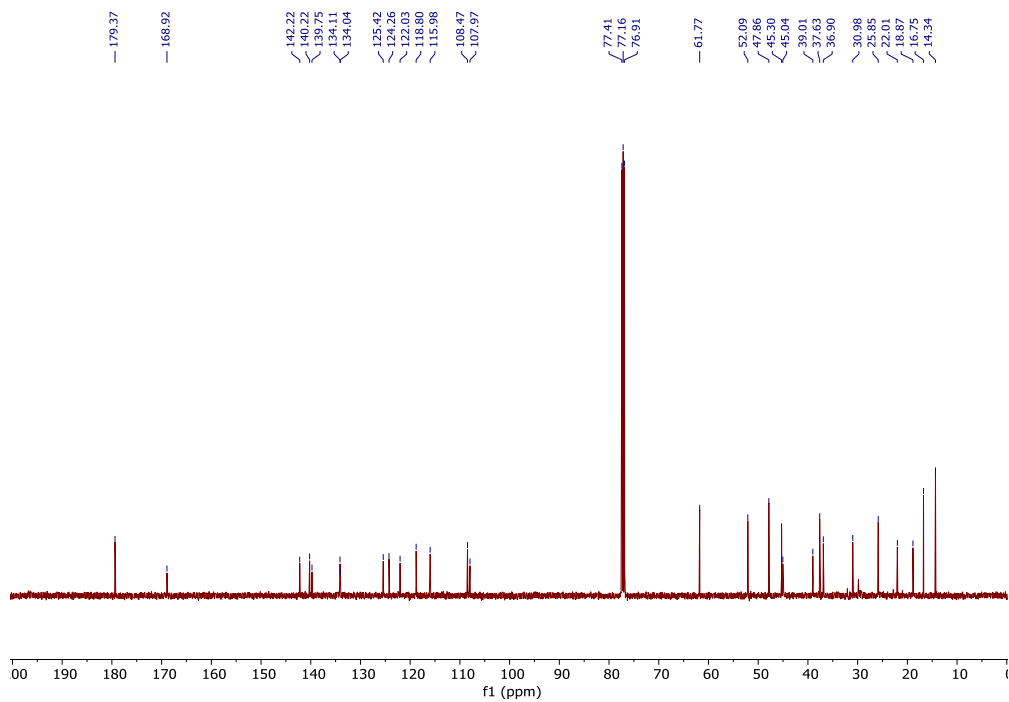

<sup>13</sup>C NMR (125 MHz, CDCl<sub>3</sub>) of (+)-9e

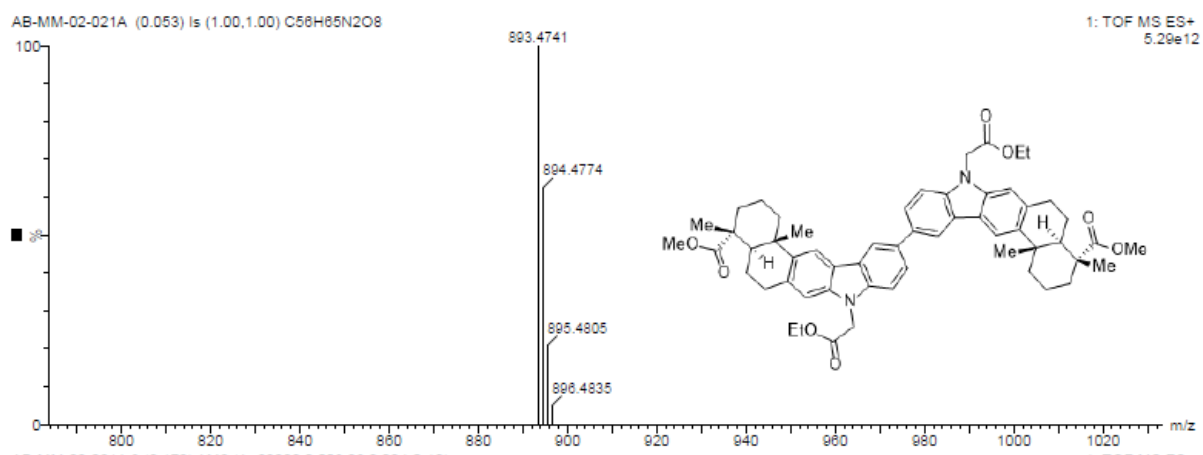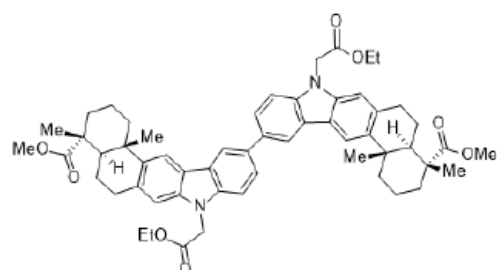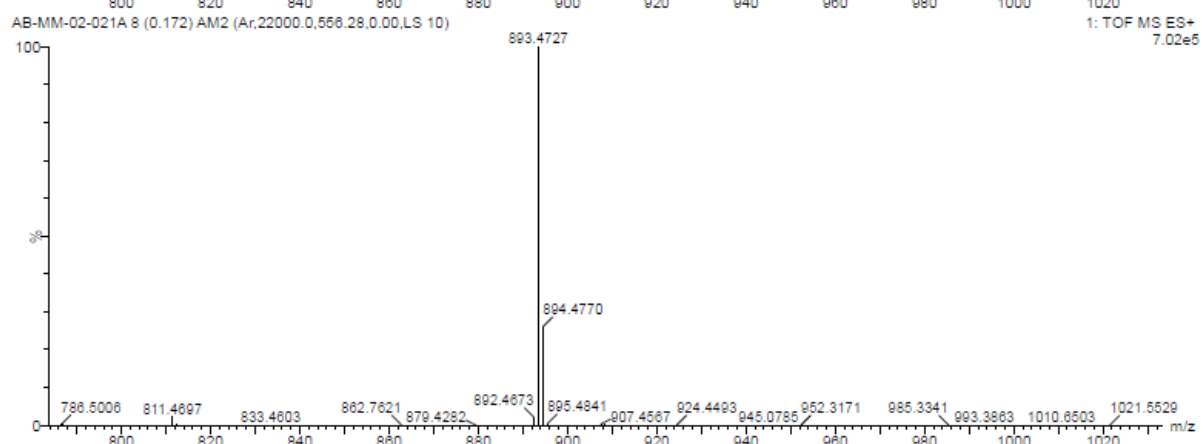

HRMS data of (+)-**9e**

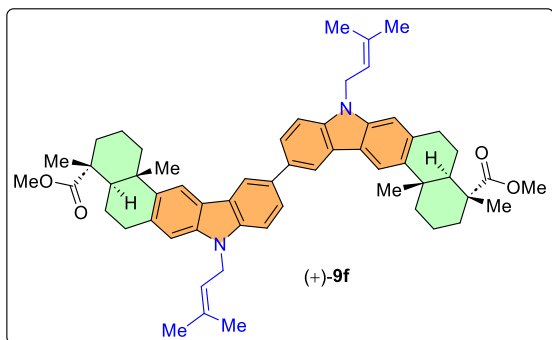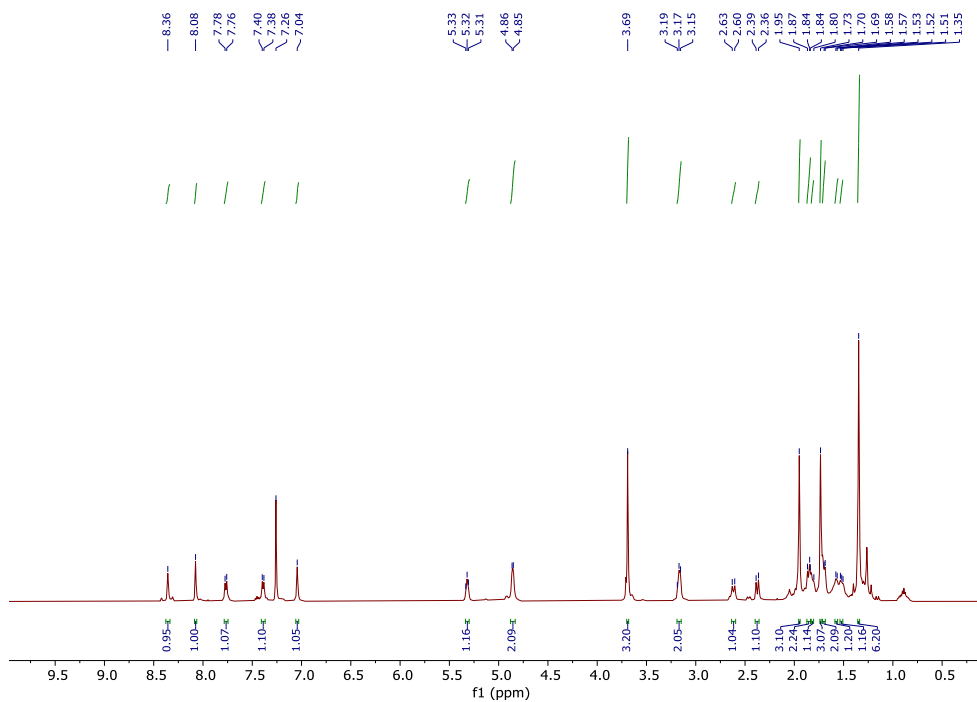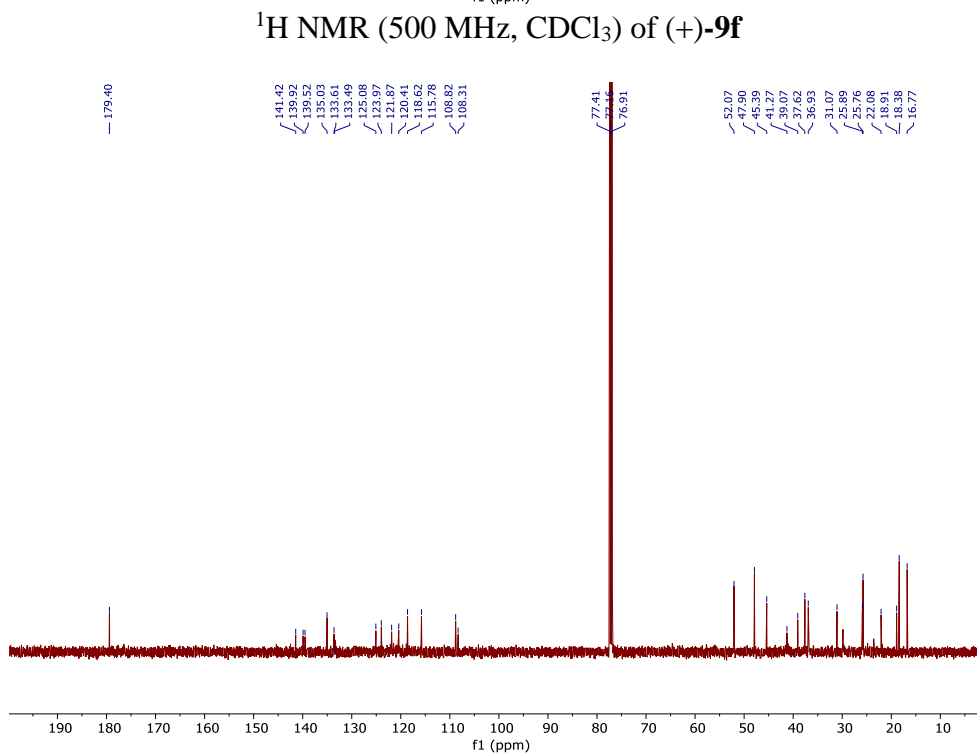

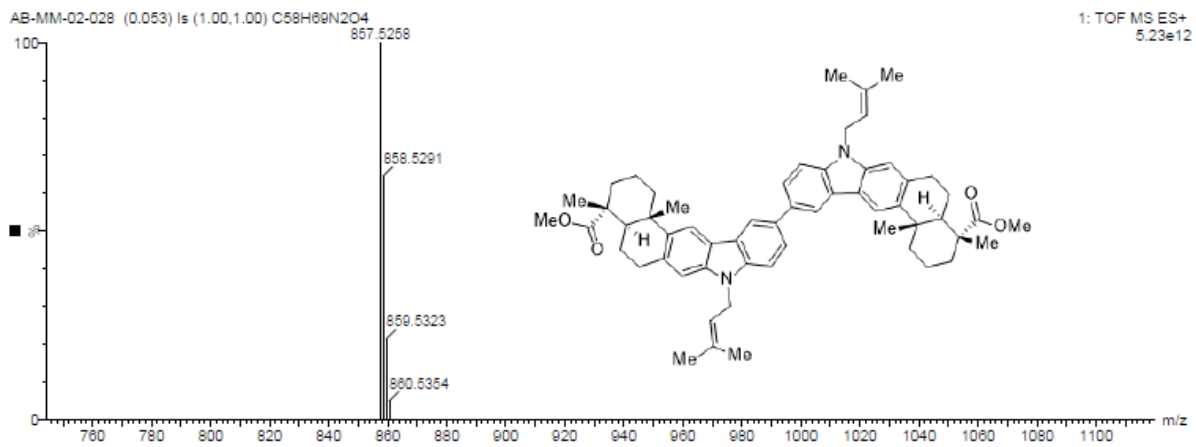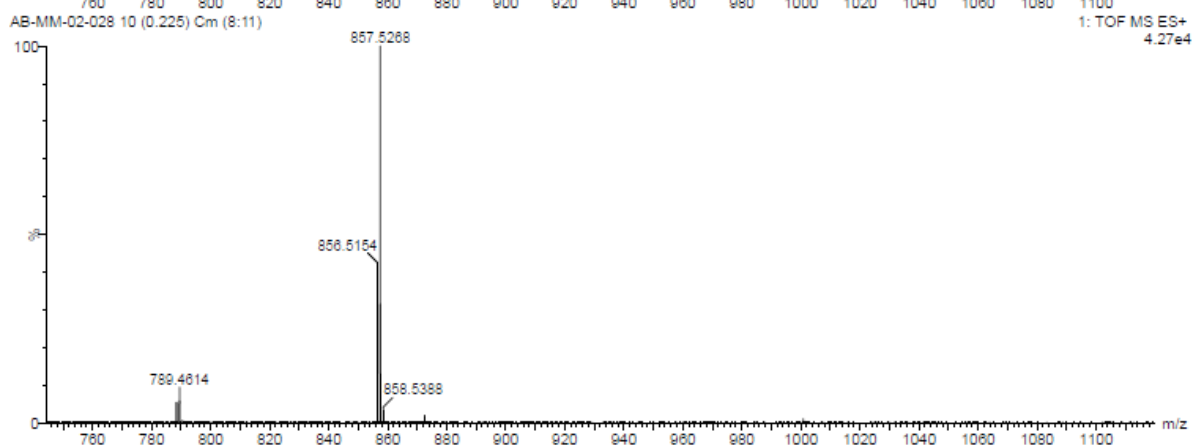

HRMS data of (+)-9f

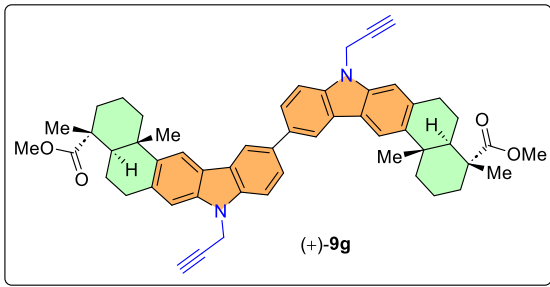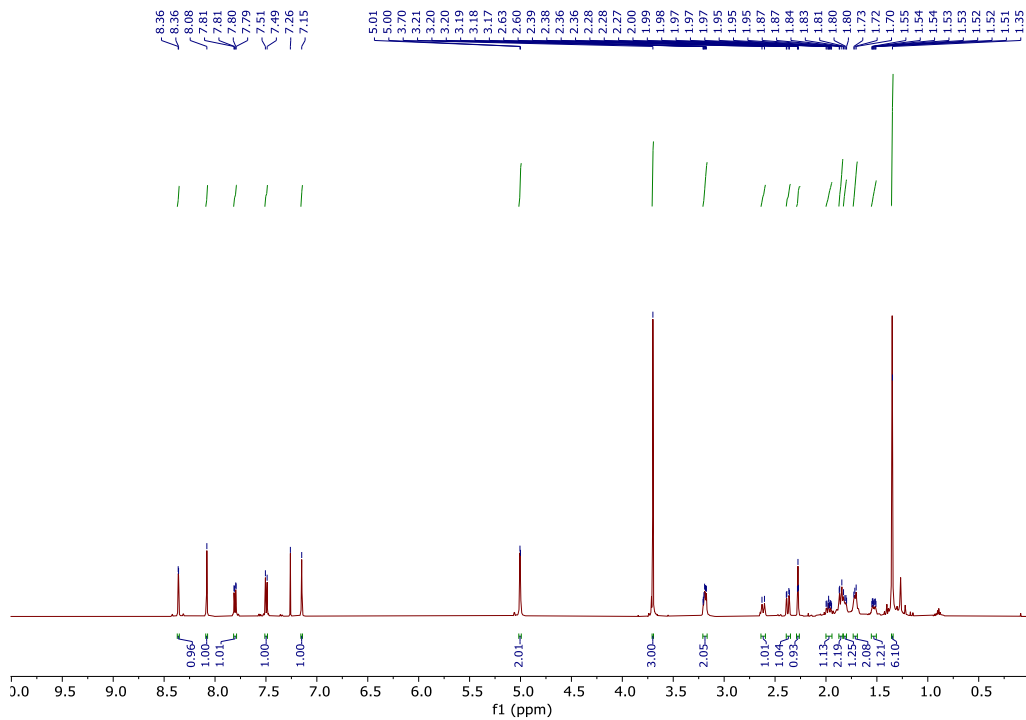

$^1\text{H}$  NMR (500 MHz,  $\text{CDCl}_3$ ) of (+)-9g

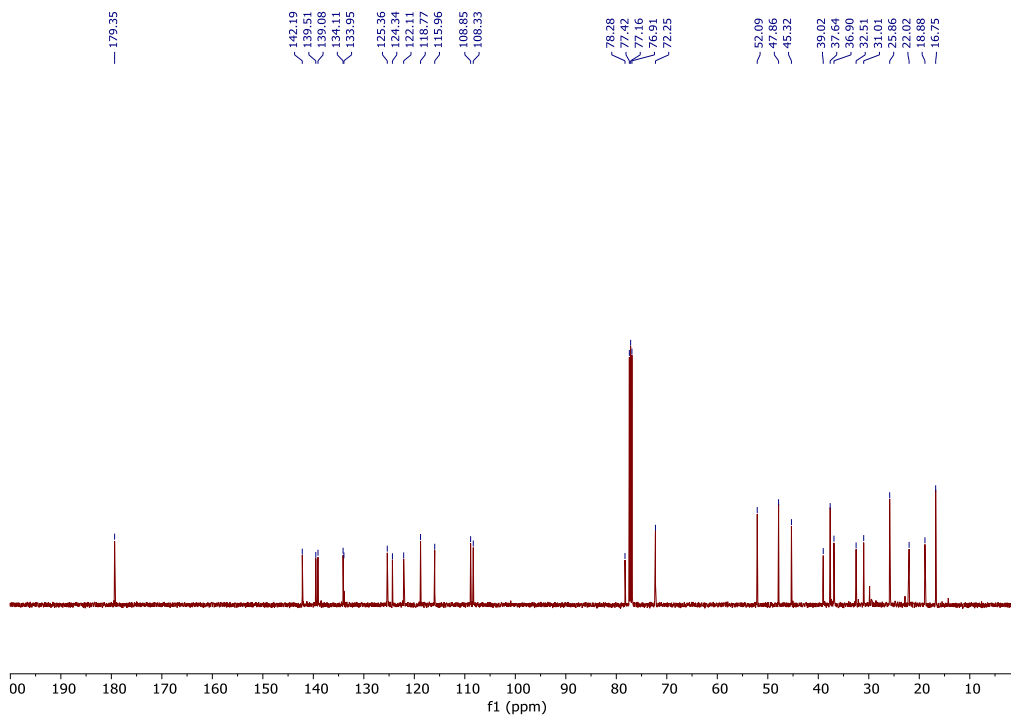

$^{13}\text{C}$  NMR (125 MHz,  $\text{CDCl}_3$ ) of (+)-9g

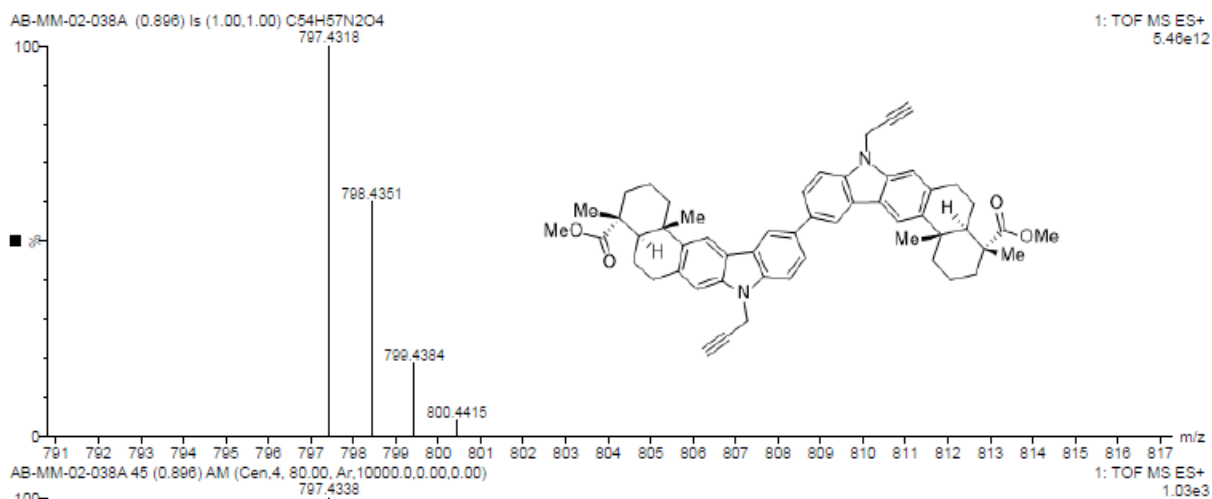

HRMS data of (+)-**9g**

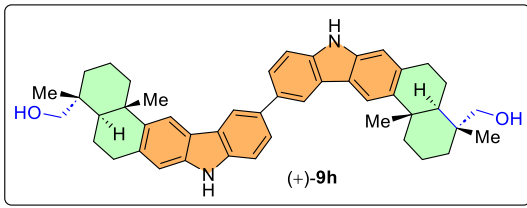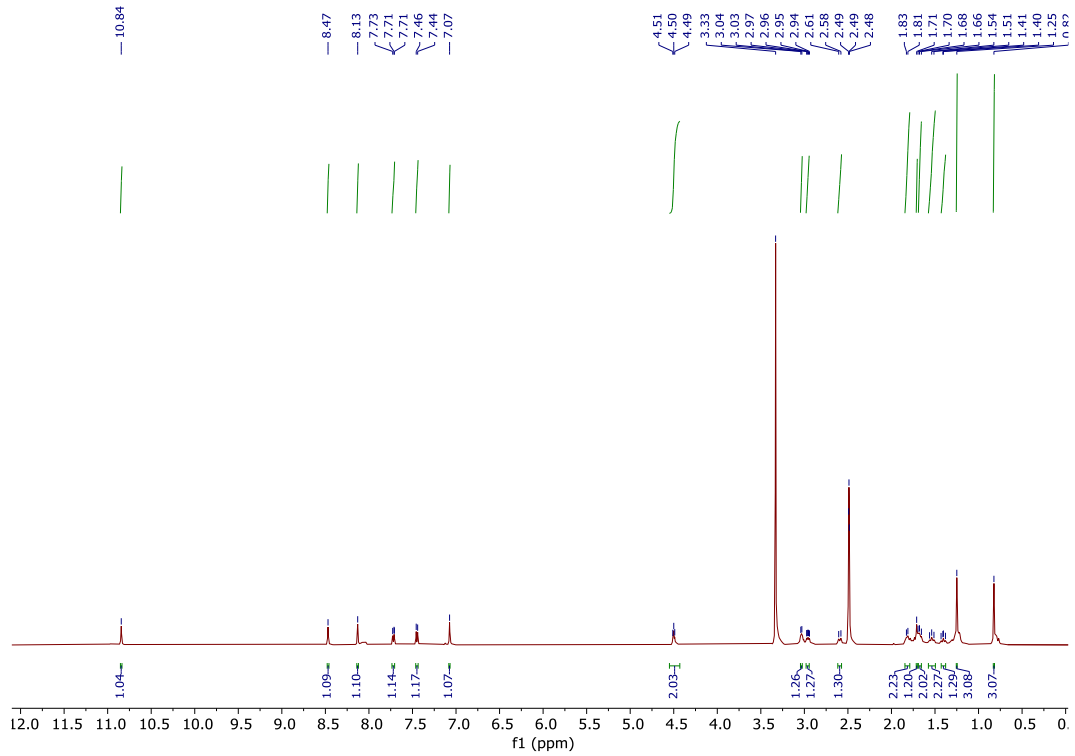

<sup>1</sup>H NMR (500 MHz, DMSO) of (+)-9h

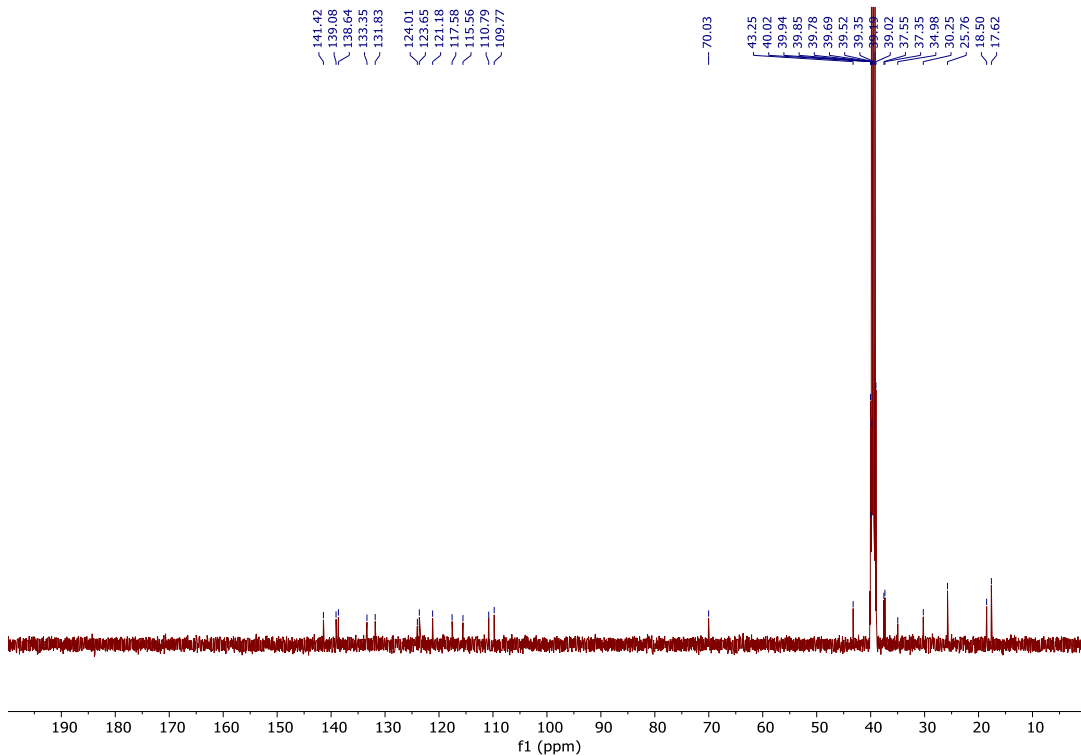

<sup>13</sup>C NMR (125 MHz, DMSO) of (+)-9h

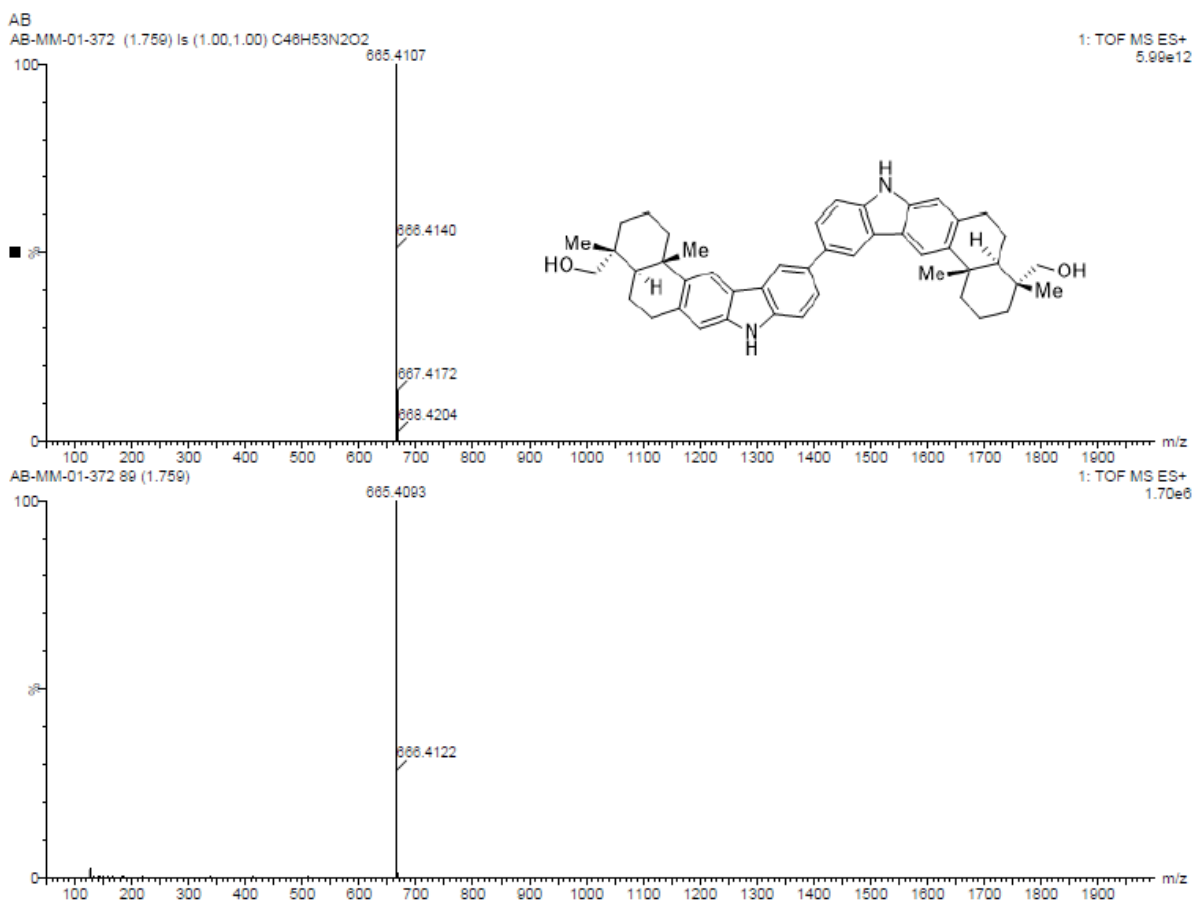

HRMS data of (+)-**9h**



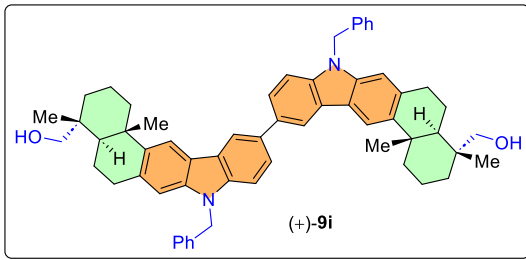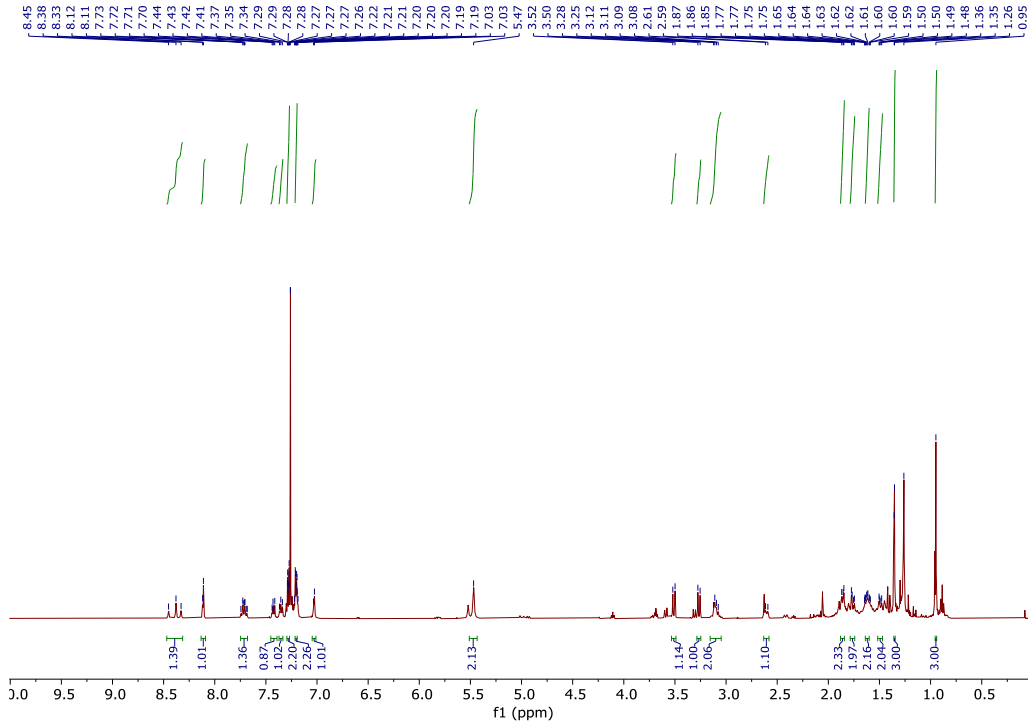

<sup>1</sup>H NMR (500 MHz, CDCl<sub>3</sub>) of (+)-9i

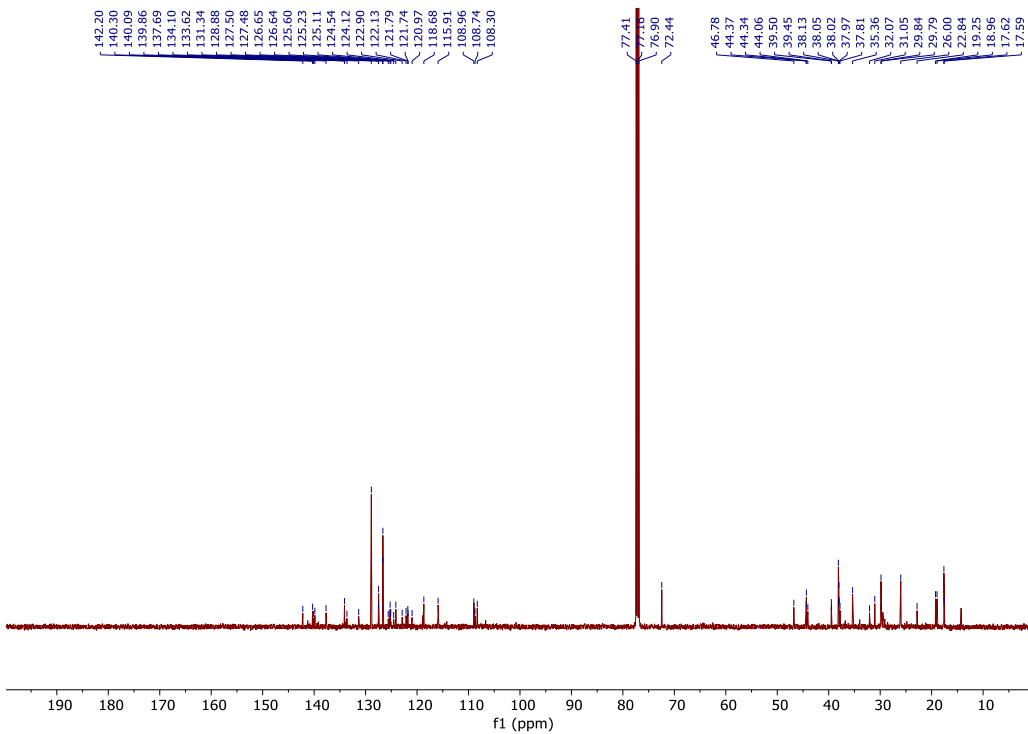

<sup>13</sup>C NMR (125 MHz, CDCl<sub>3</sub>) of (+)-9i

AB-MM-02-058A (0.053) Is (1.00,1.00) C<sub>20</sub>H<sub>24</sub>N<sub>2</sub>O<sub>2</sub>

1: TOF MS ES+  
5.14e12

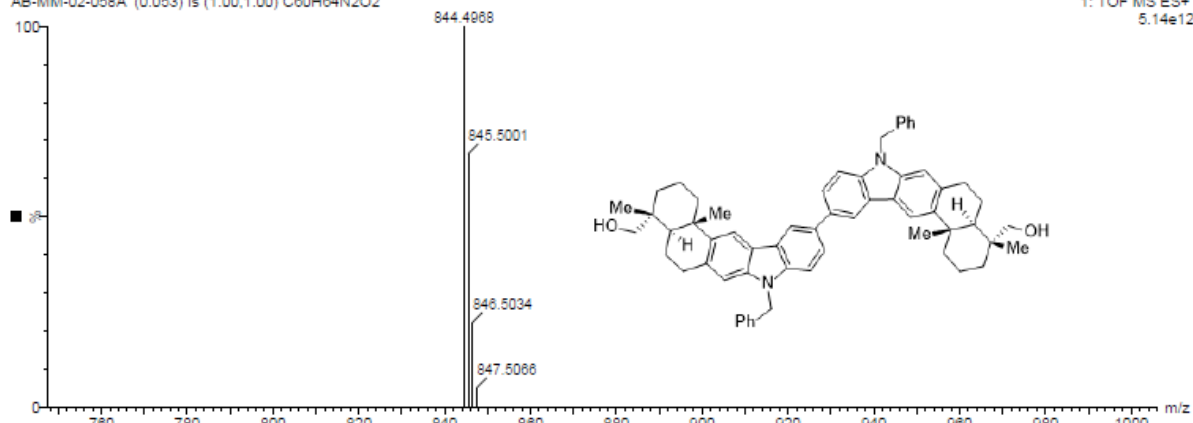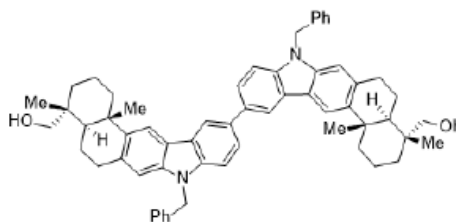

AB-MM-02-058A 1 (0.053) AM (Cen.4, 80.00, Ar,10000.0,0.00,0.00); Cm (1:8)

1: TOF MS ES+  
1.64e6

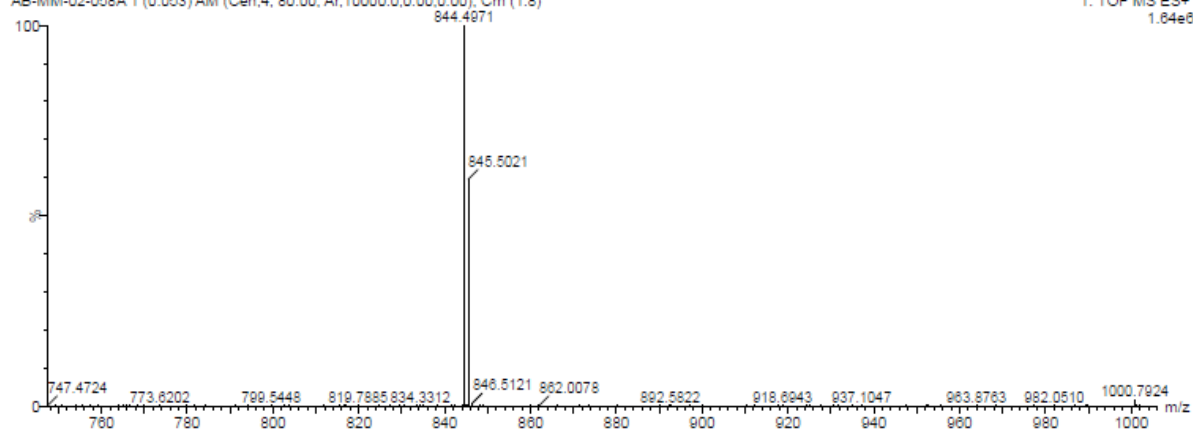

HRMS data of (+)-9i

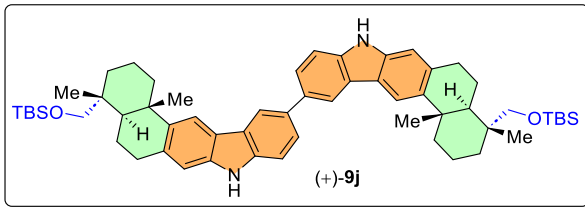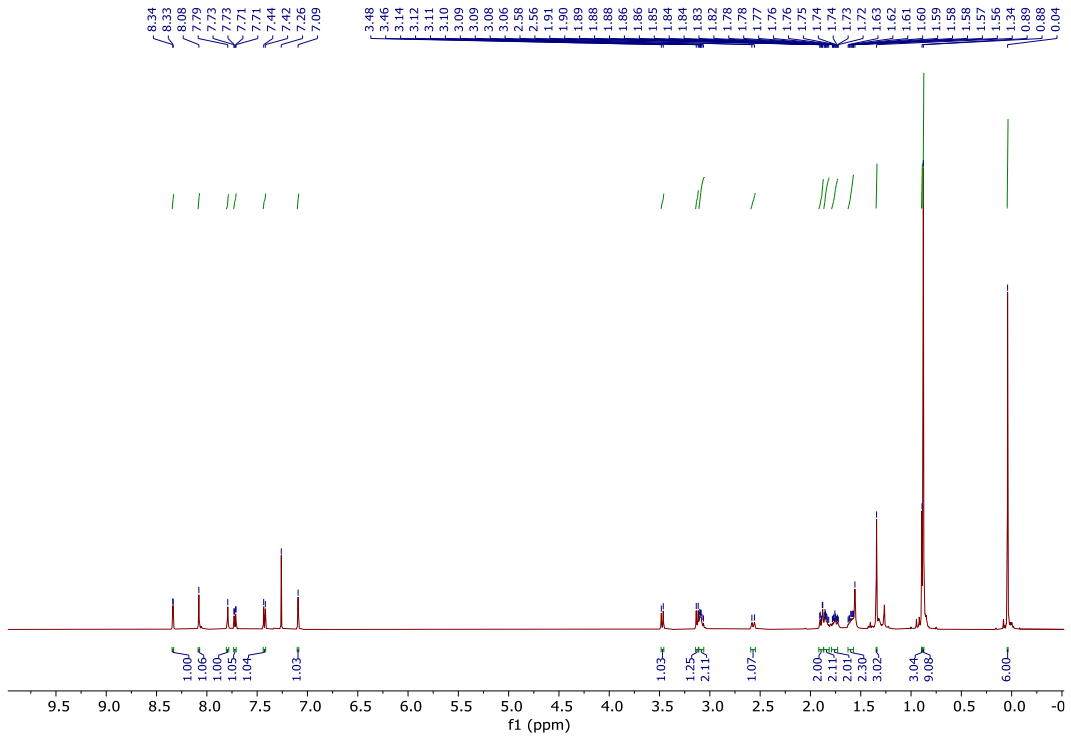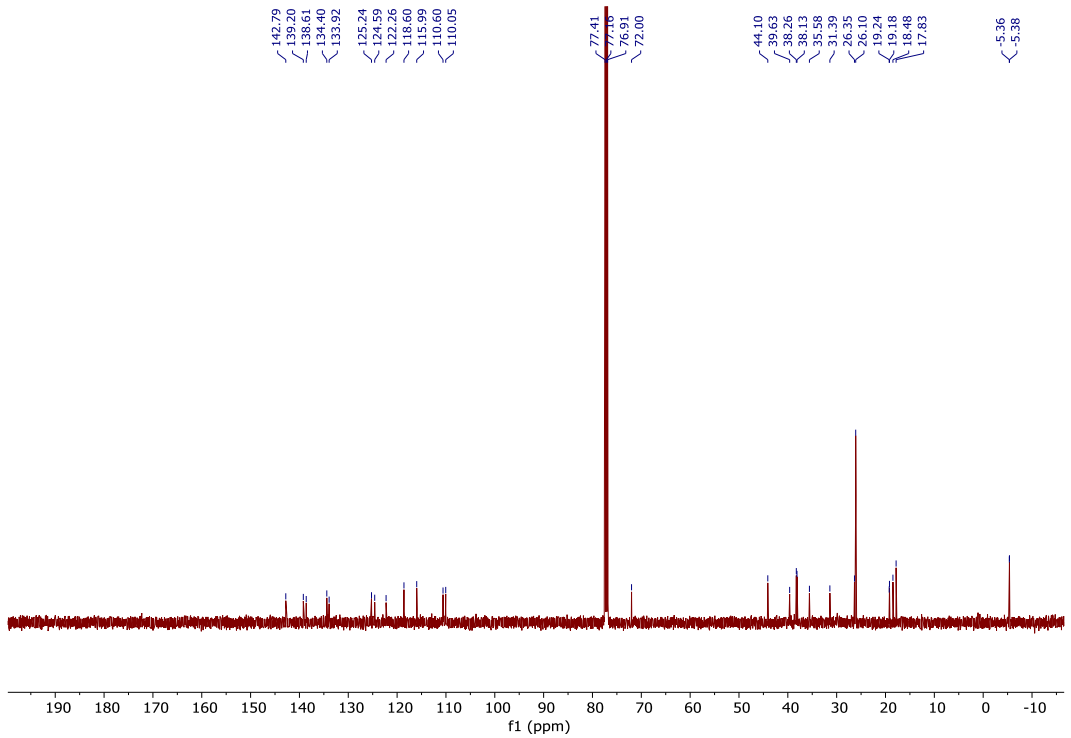

## Display Report

**Analysis Info**

Analysis Name D:\Data\User data\2022\NOV\AB\_MM\_01\_379.d  
 Method Tune\_pos\_Mid\_July.m  
 Sample Name AB\_MM\_01\_379  
 Comment

Acquisition Date 11/17/2022 11:17:59 AM

Operator IISER Kolkata  
 Instrument maXis impact 8282001.00127

**Acquisition Parameter**

|             |          |                      |          |                  |           |
|-------------|----------|----------------------|----------|------------------|-----------|
| Source Type | ESI      | Ion Polarity         | Positive | Set Nebulizer    | 0.5 Bar   |
| Focus       | Active   | Set Capillary        | 3400 V   | Set Dry Heater   | 200 °C    |
| Scan Begin  | 50 m/z   | Set End Plate Offset | -500 V   | Set Dry Gas      | 4.0 l/min |
| Scan End    | 3000 m/z | Set Charging Voltage | 2000 V   | Set Divert Valve | Source    |
|             |          | Set Corona           | 0 nA     | Set APCI Heater  | 0 °C      |

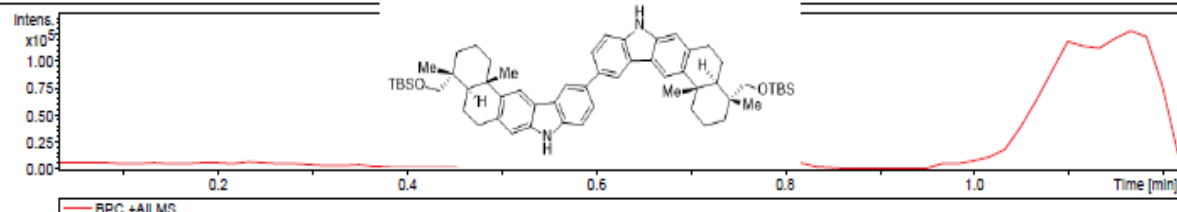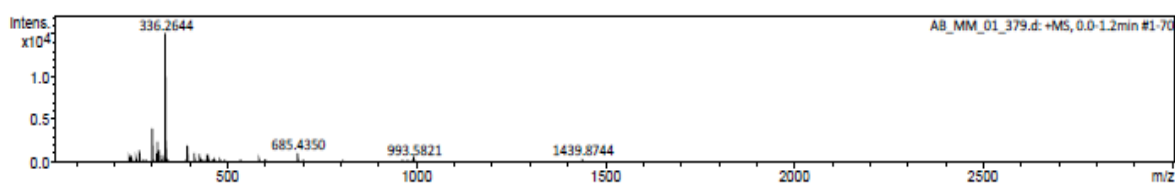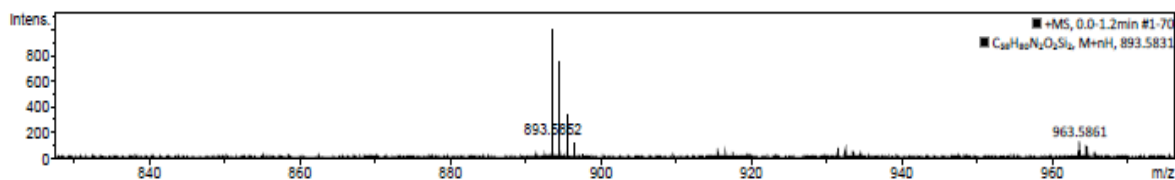

HRMS data of (+)-9j

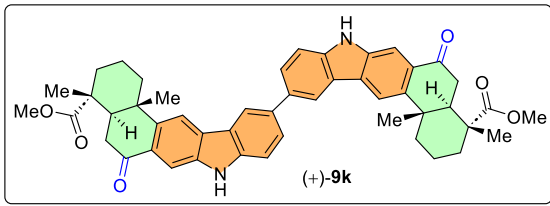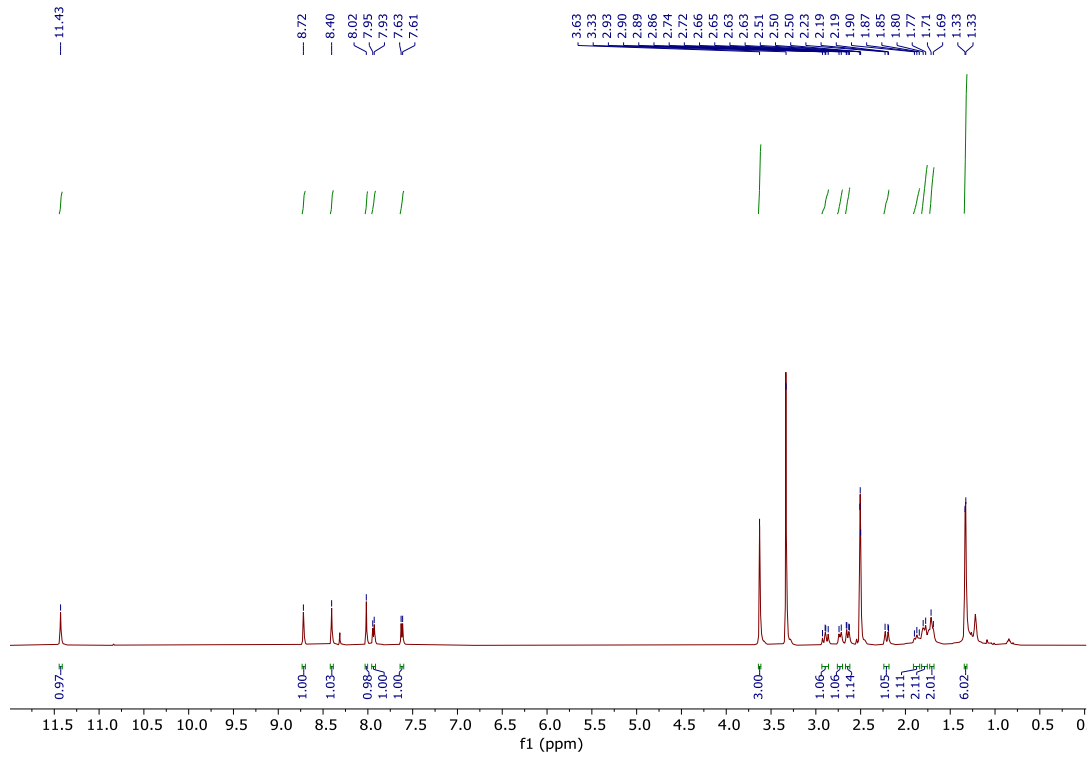

<sup>1</sup>H NMR (500 MHz, DMSO) of (+)-9k

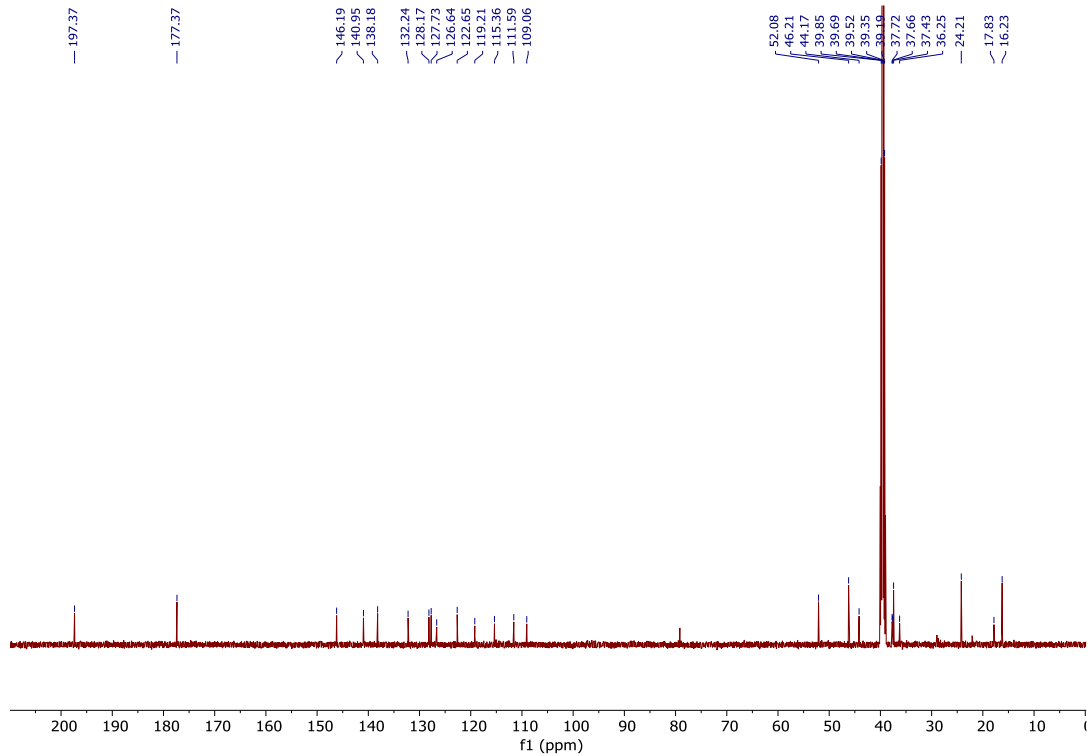

<sup>13</sup>C NMR (125 MHz, DMSO) of (+)-9k

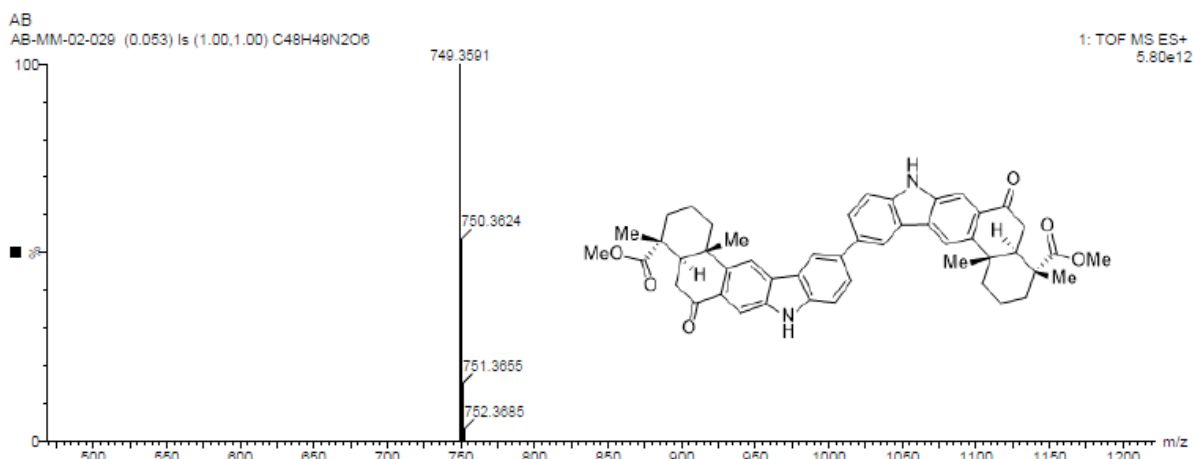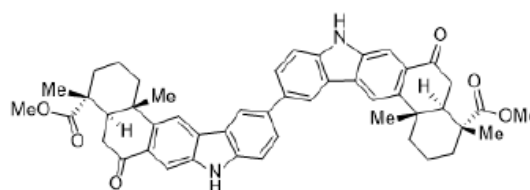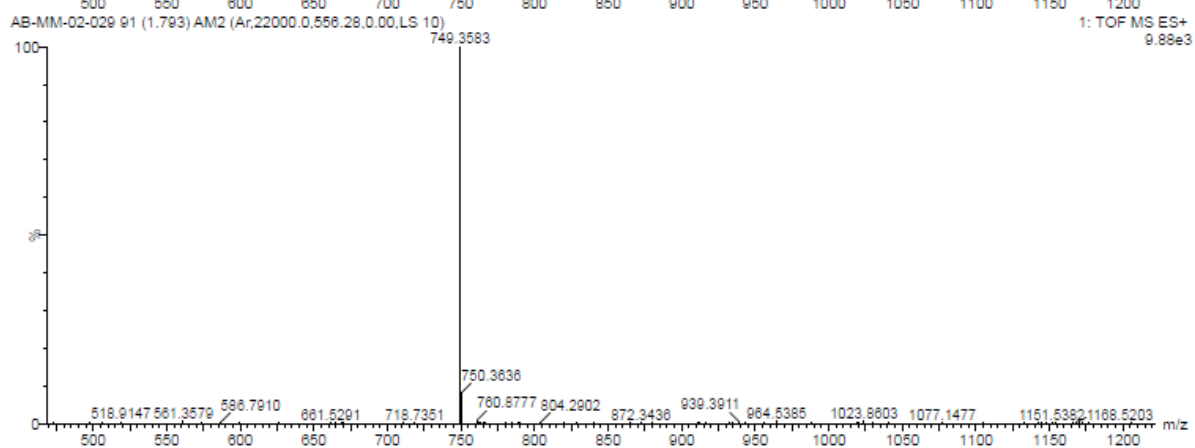

HRMS data of (+)-**9k**

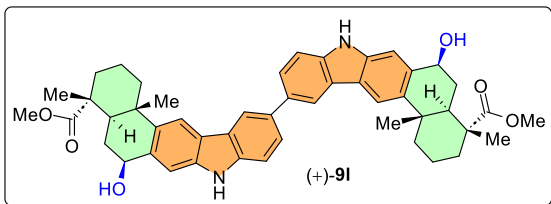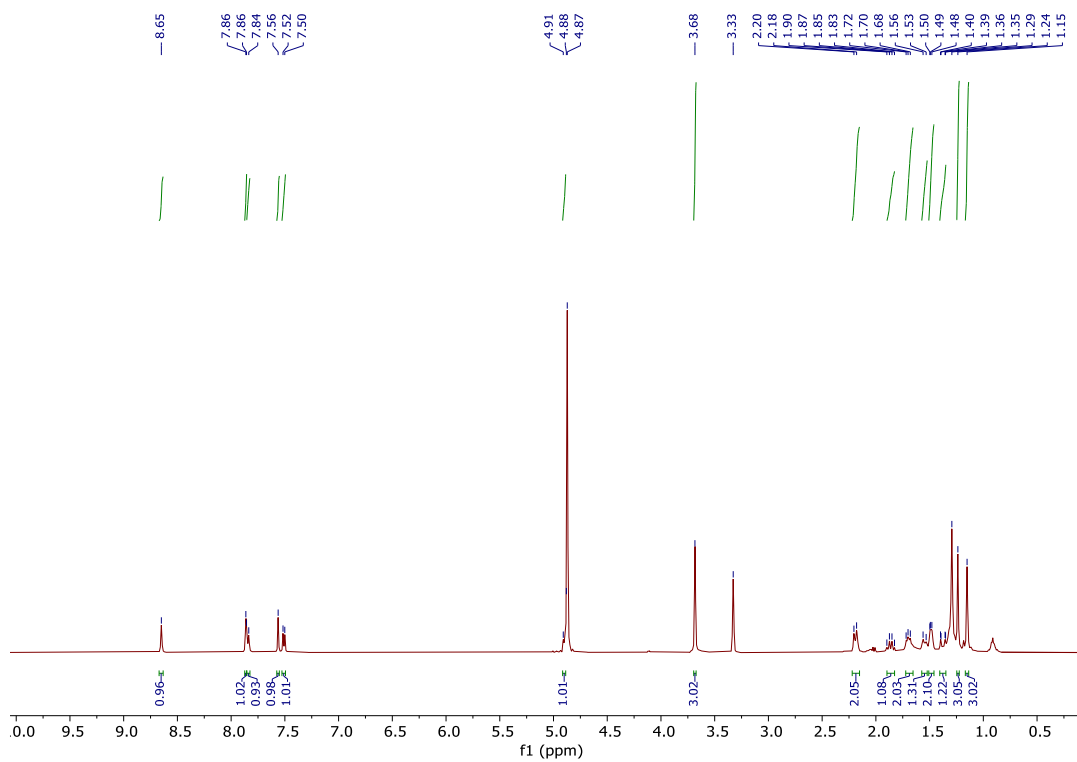

<sup>1</sup>H NMR (500 MHz, CD<sub>3</sub>OD) of (+)-**91**

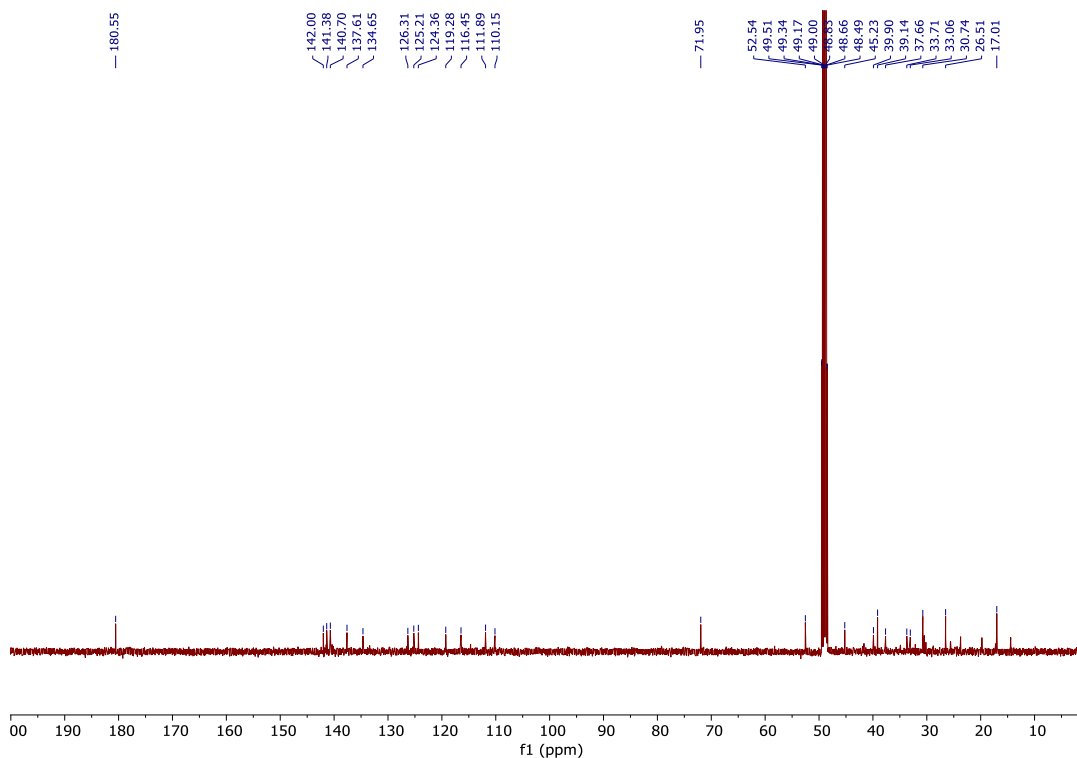

<sup>13</sup>C NMR (125 MHz, CD<sub>3</sub>OD) of (+)-**91**

AB  
AB-MM-02-037B (0.053) Is (1.00,1.00) C<sub>48</sub>H<sub>52</sub>N<sub>2</sub>O<sub>8</sub> 1: TOF MS ES+ 5.80e12

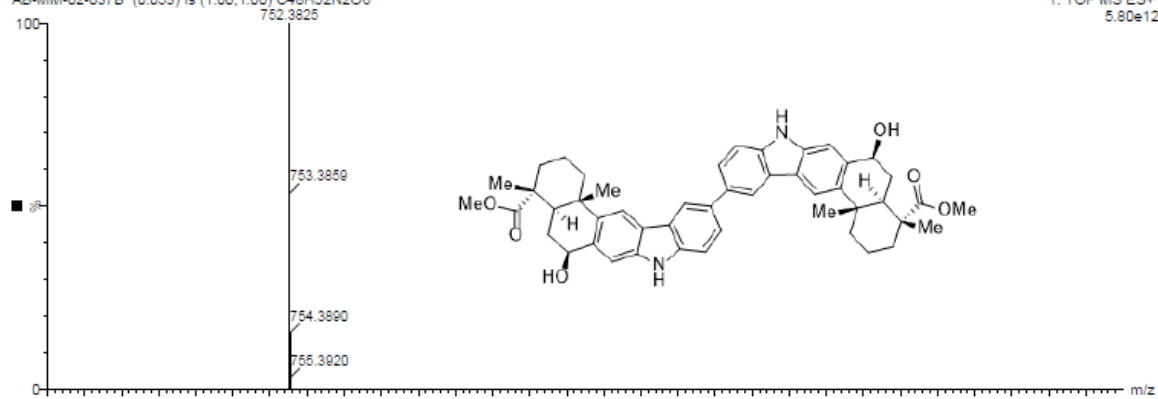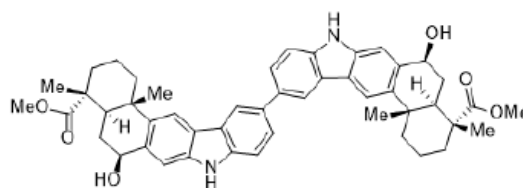

AB-MM-02-037B 177 (3.484) AM2 (Ar,22000,0,556.28,0.00,LS 10) 1: TOF MS ES+ 3.35e5

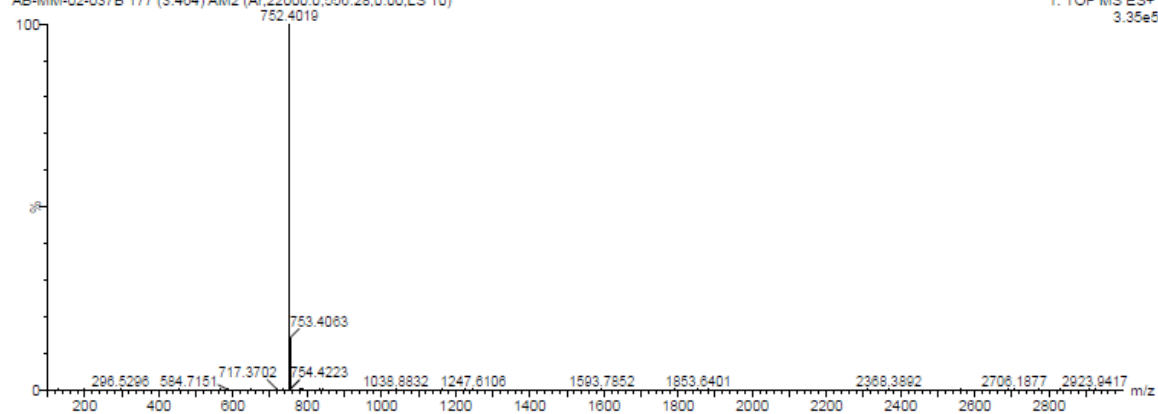

HRMS data of (+)-91





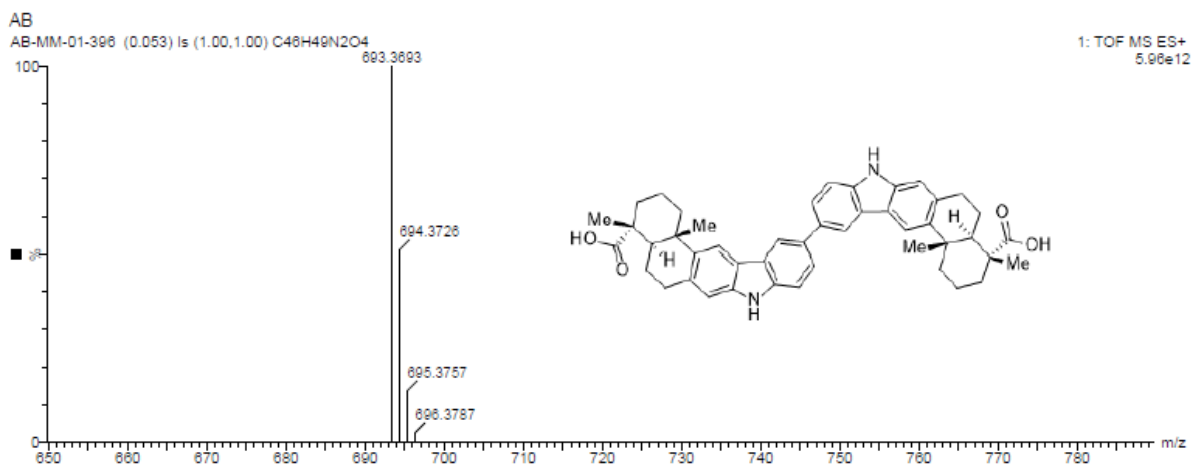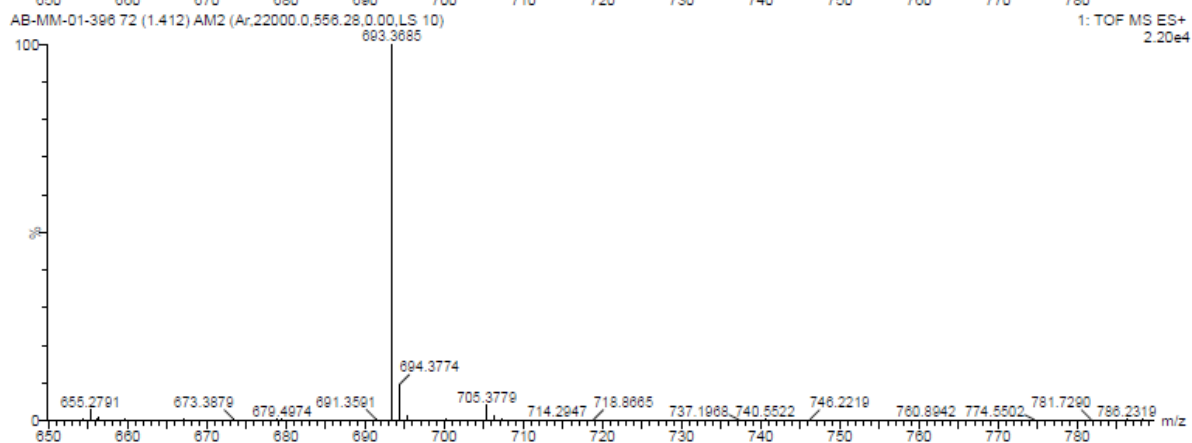

HRMS data of (+)-**9m**

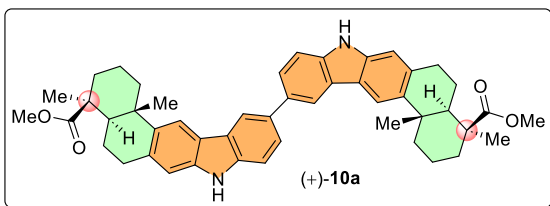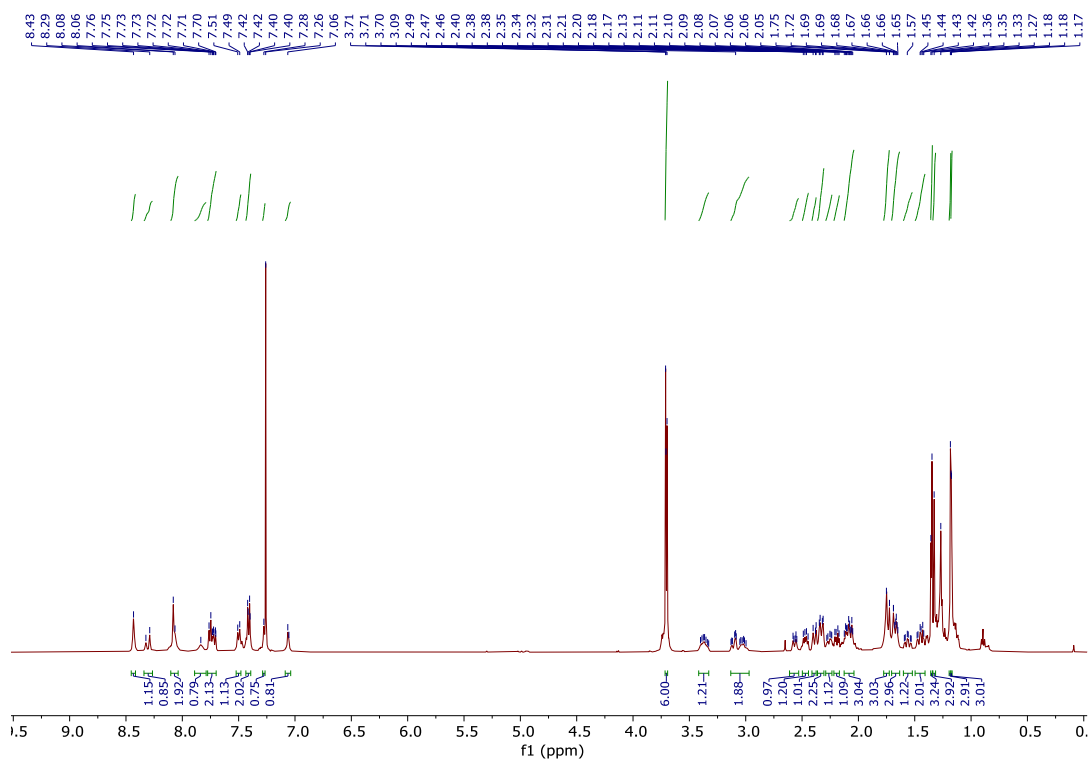

<sup>1</sup>H NMR (500 MHz, CDCl<sub>3</sub>) of (+)-10a

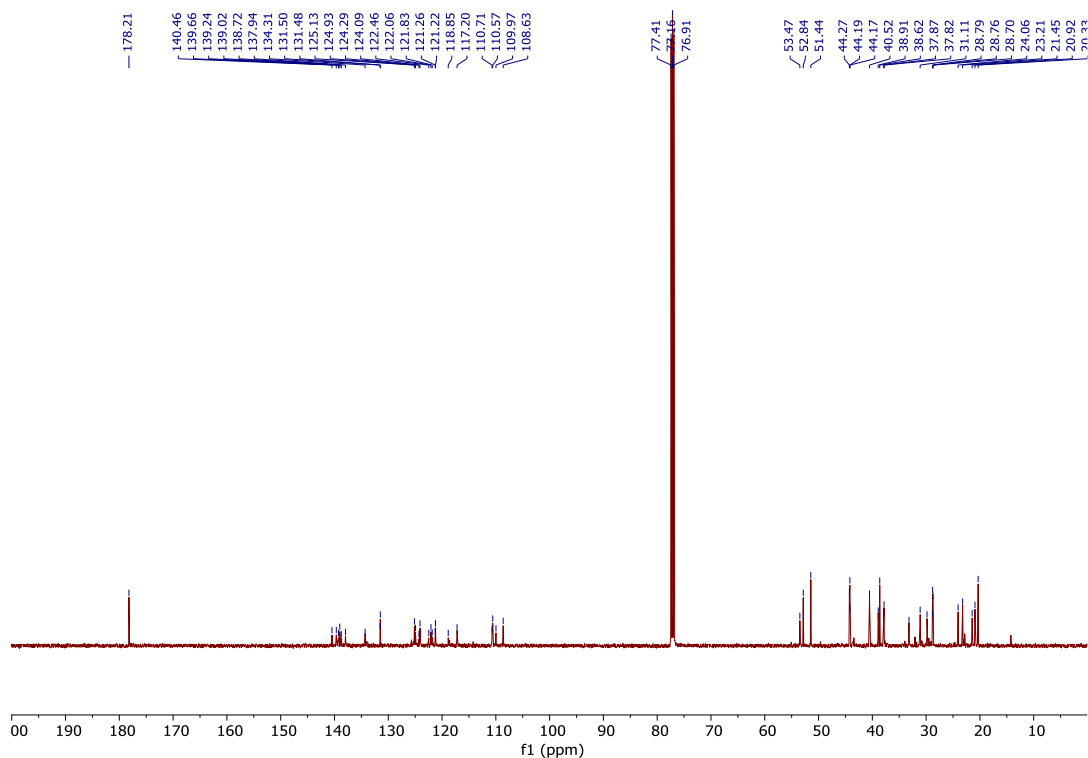

<sup>13</sup>C NMR (125 MHz, CDCl<sub>3</sub>) of (+)-10a

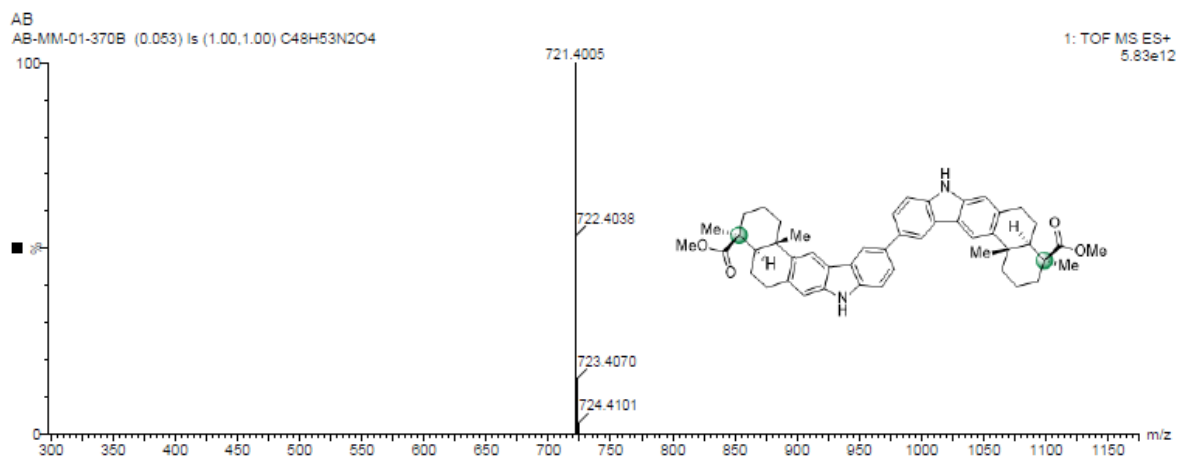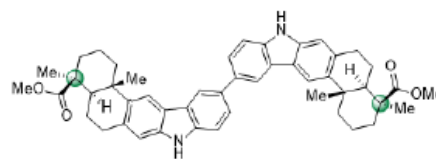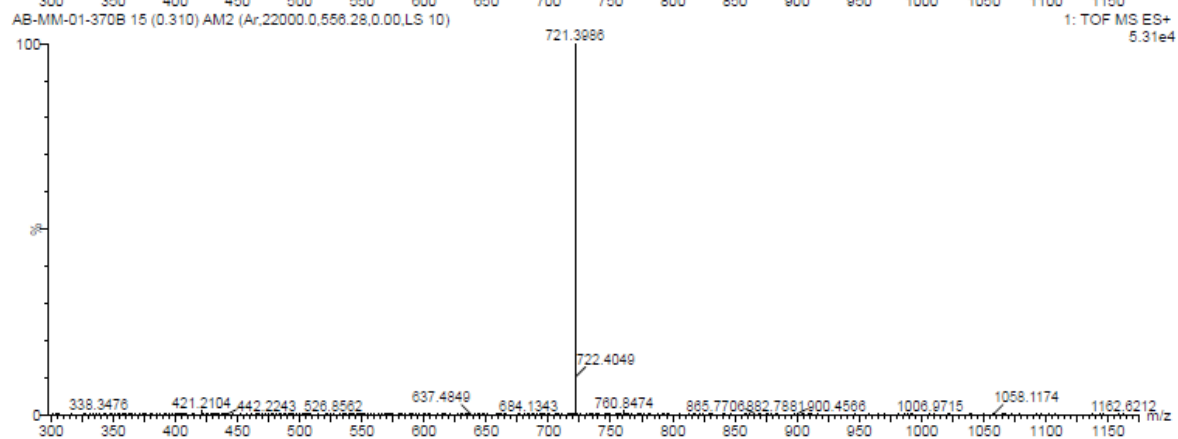

HRMS data of (+)-**10a**

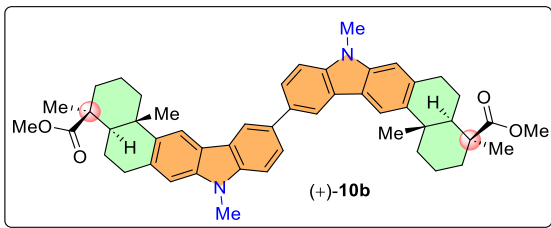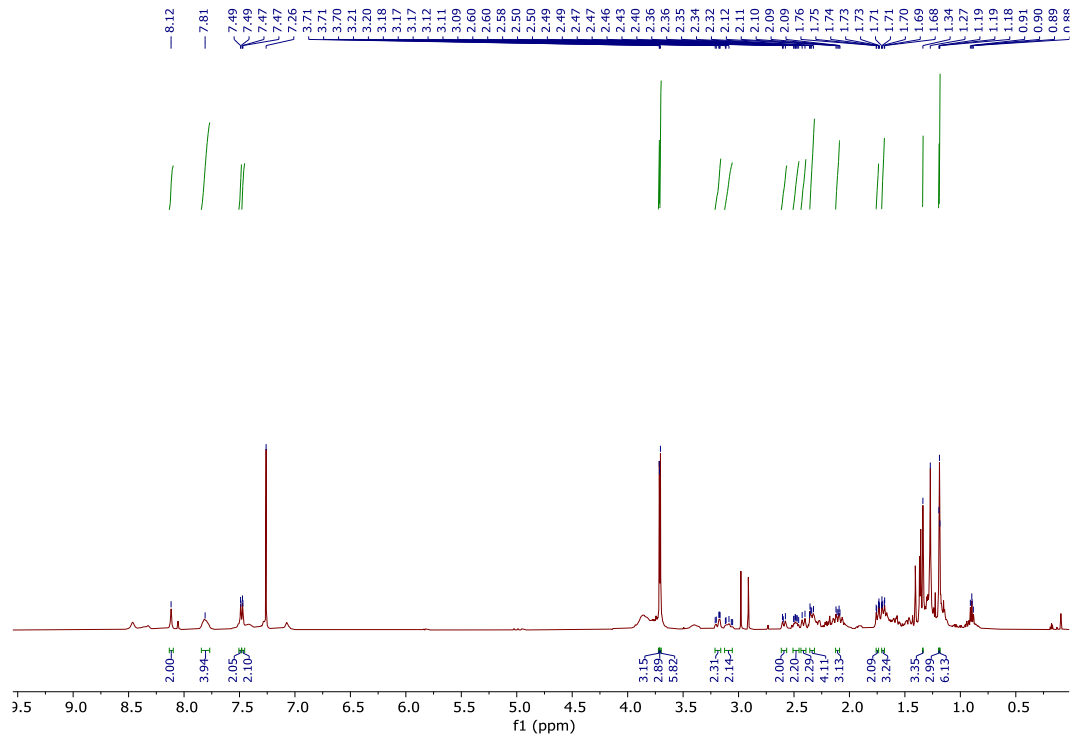

<sup>1</sup>H NMR (500 MHz, CDCl<sub>3</sub>) of (+)-10b

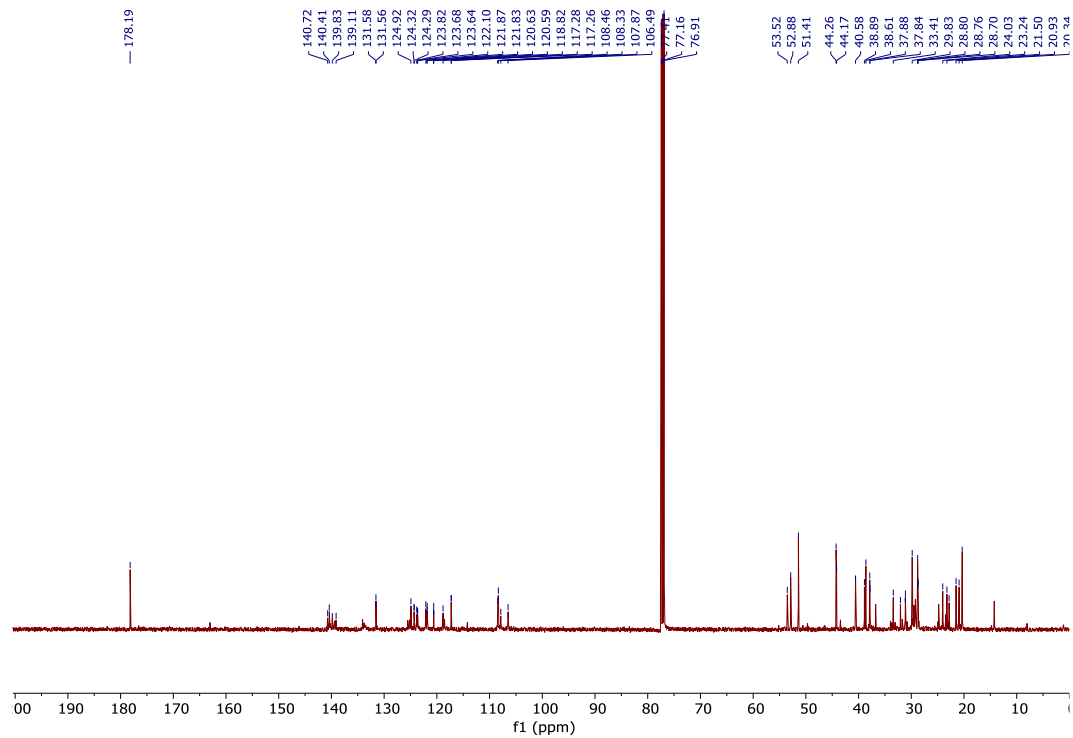

<sup>13</sup>C NMR (125 MHz, CDCl<sub>3</sub>) of (+)-10b

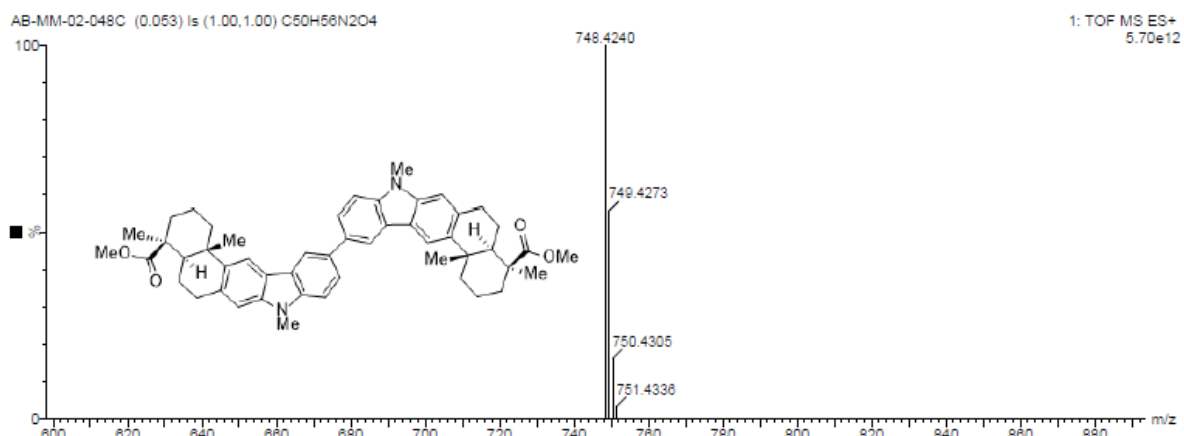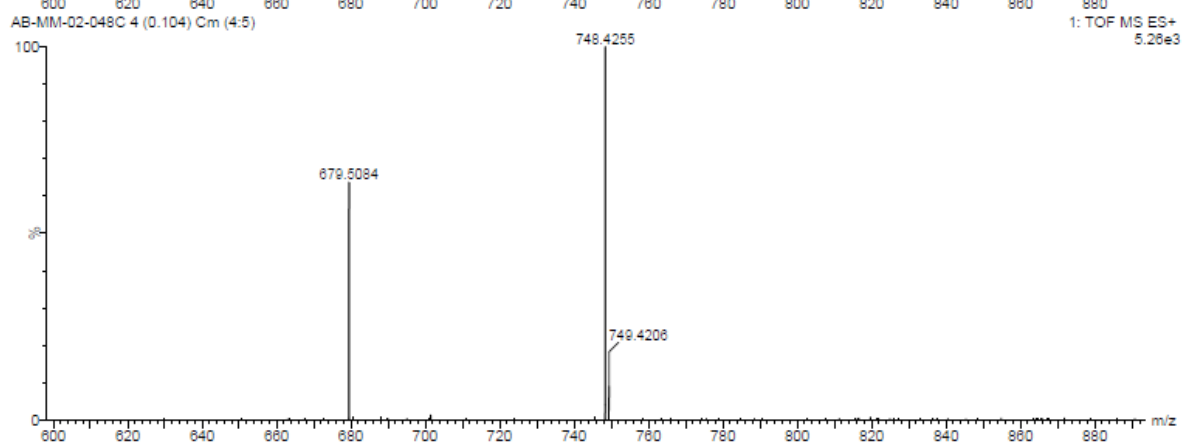

HRMS data of (+)-10b



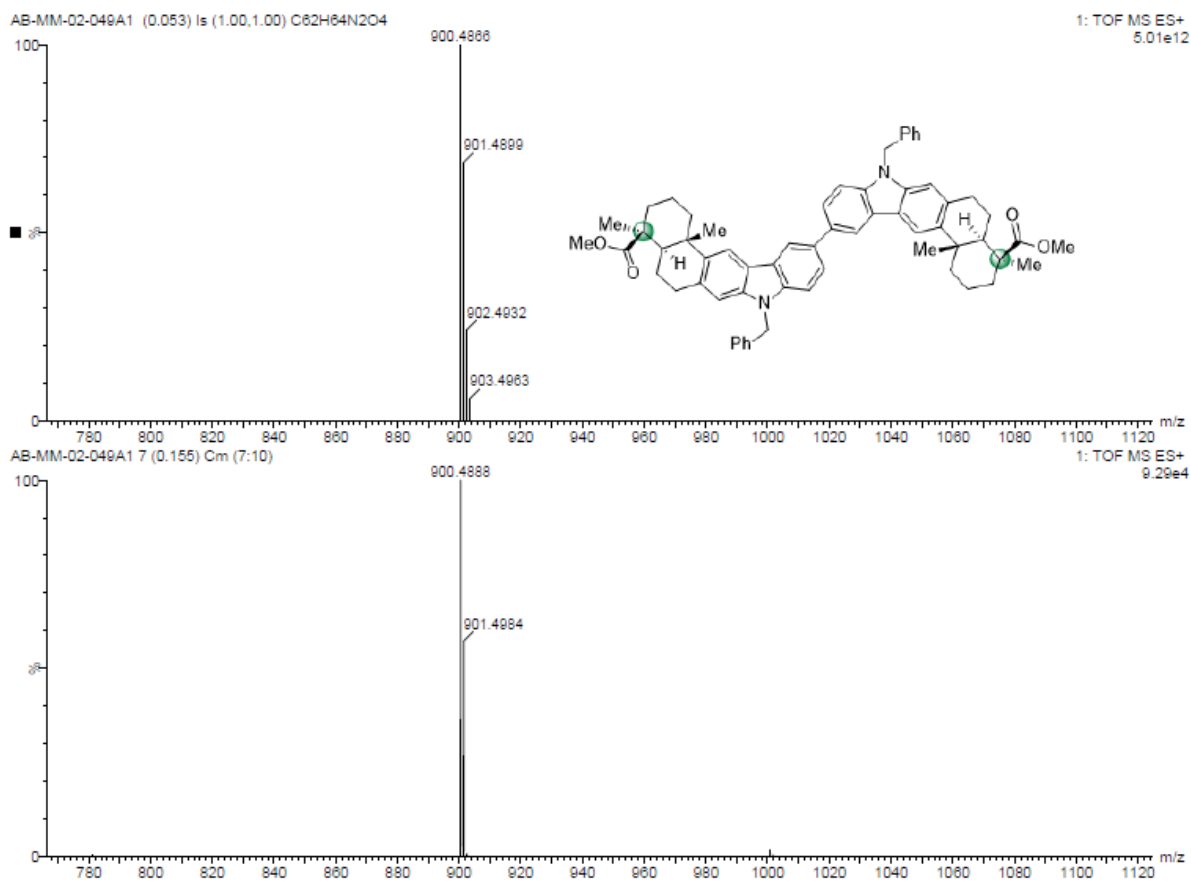



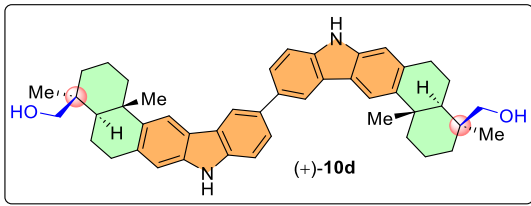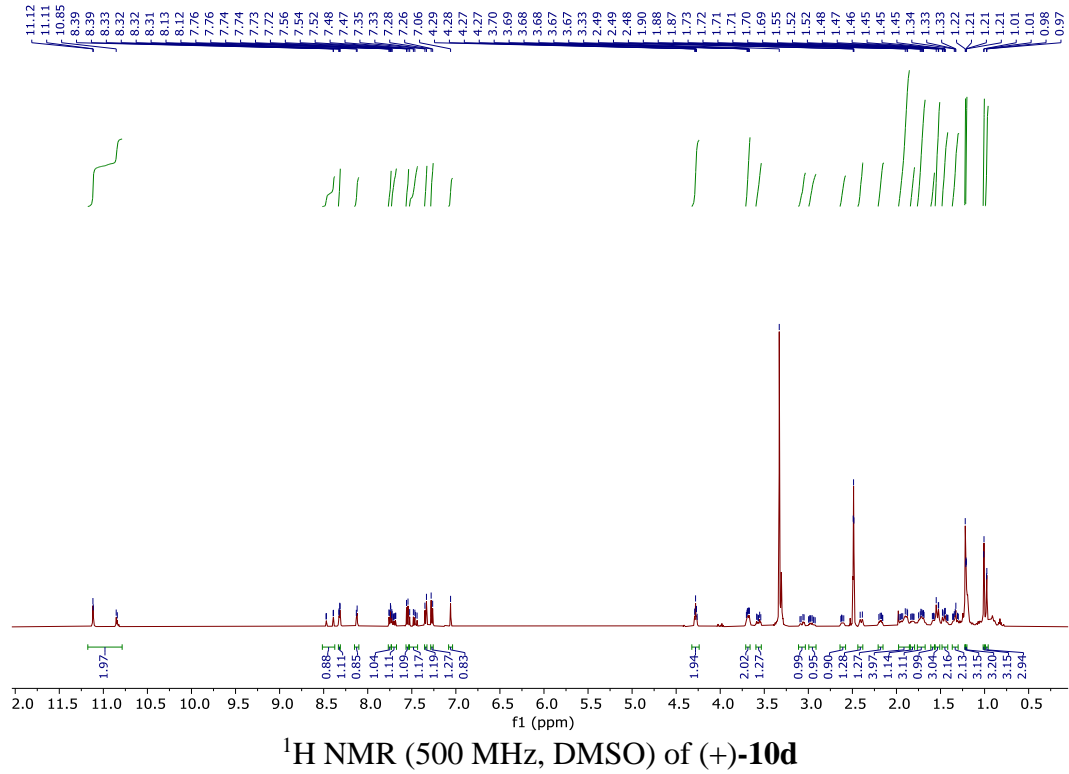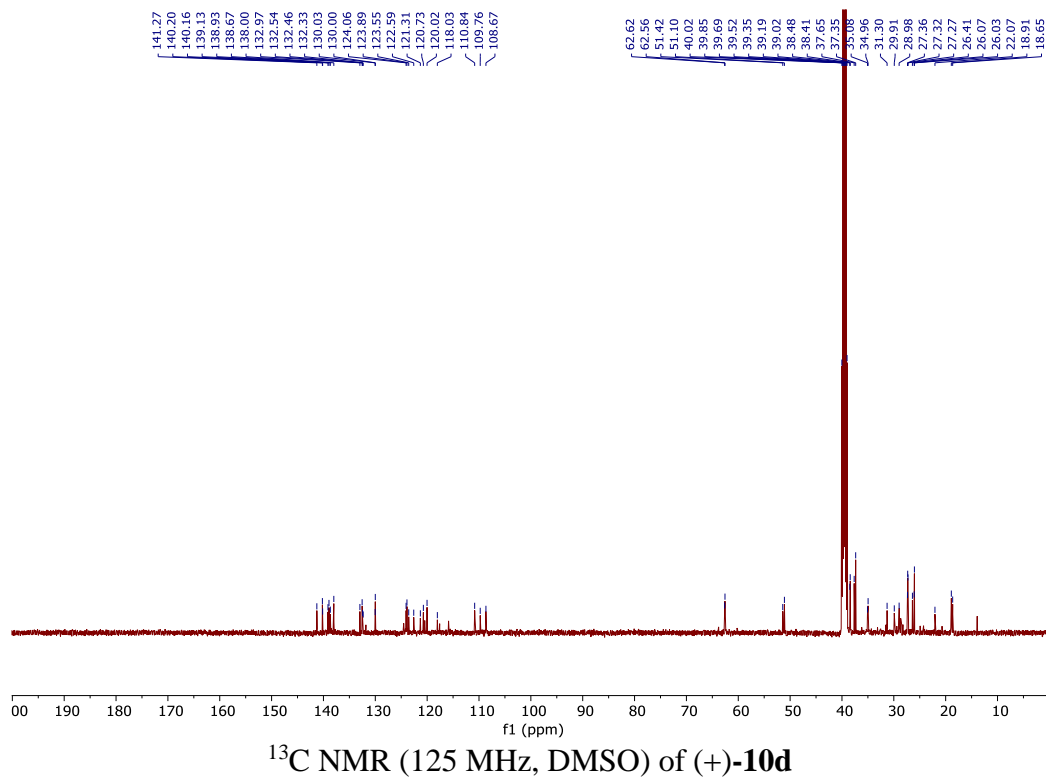

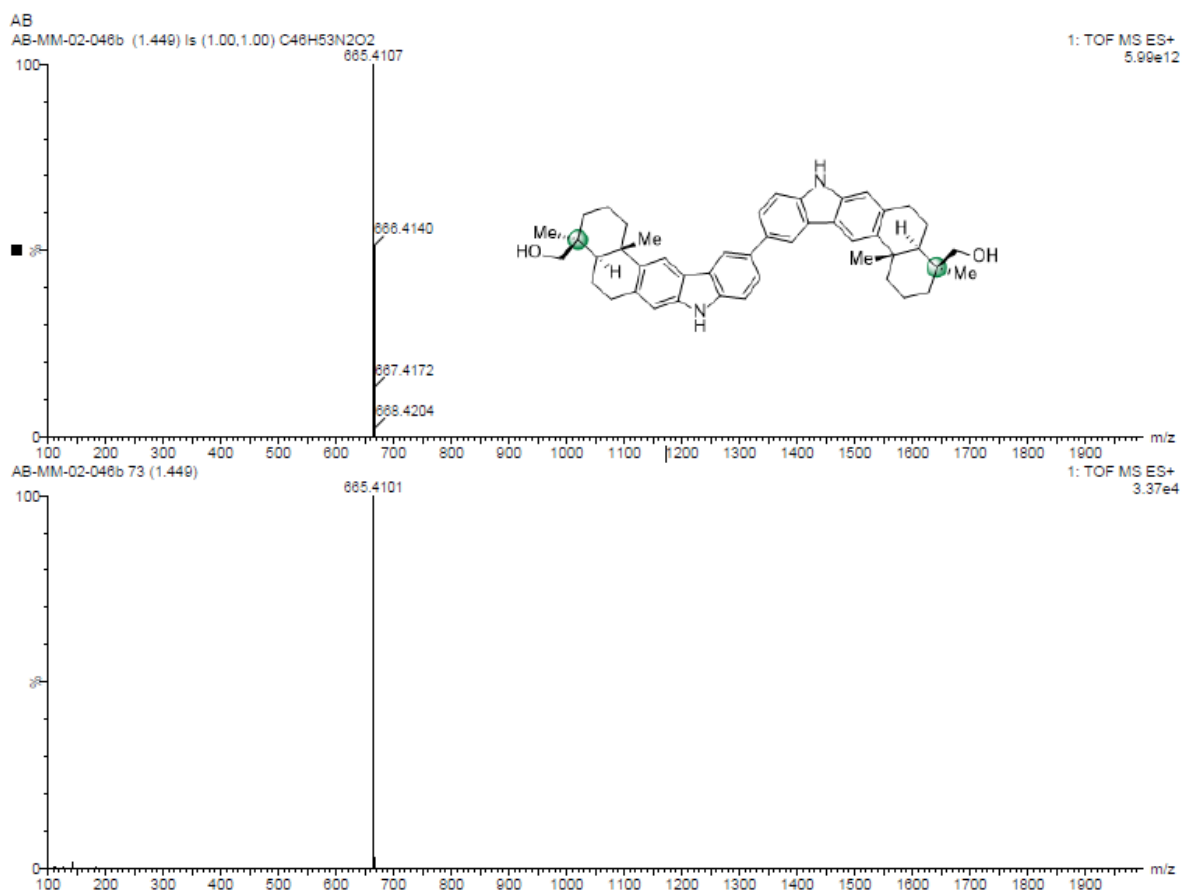

HRMS data of (+)-10d

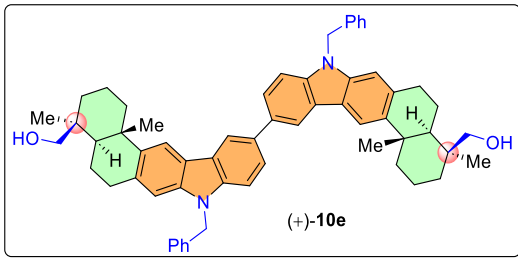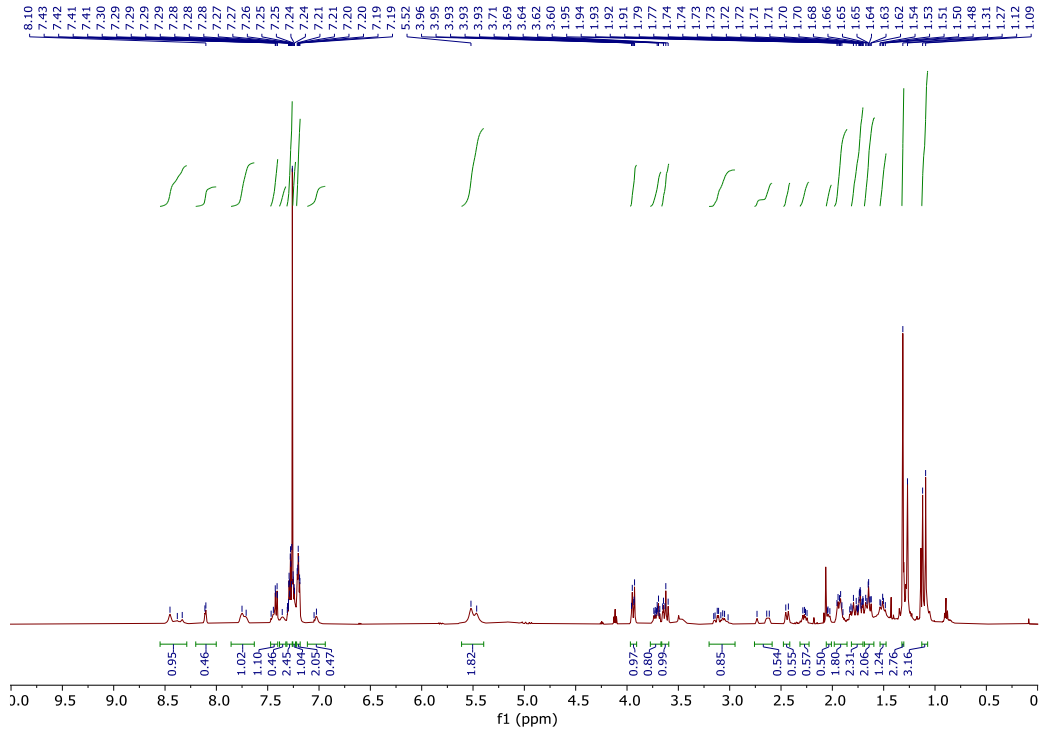

<sup>1</sup>H NMR (500 MHz, CDCl<sub>3</sub>) of (+)-10e

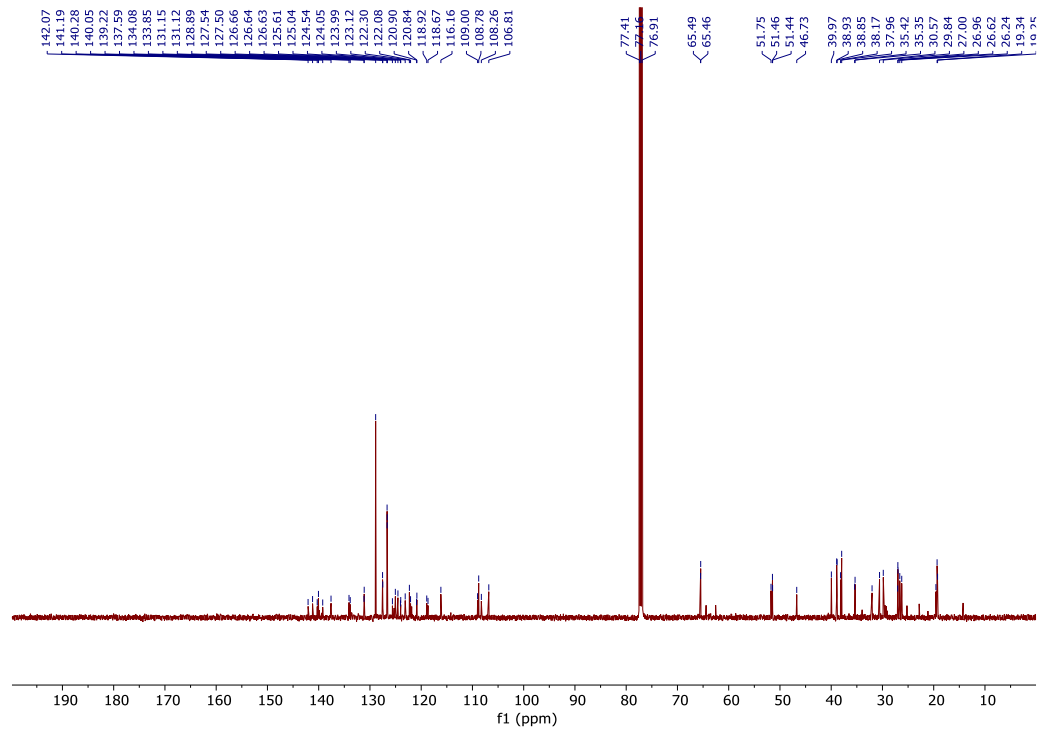

<sup>13</sup>C NMR (125 MHz, CDCl<sub>3</sub>) of (+)-10e

AB-MM-02-056C1 (0.053) Is (1.00,1.00) C<sub>28</sub>H<sub>34</sub>N<sub>2</sub>O<sub>2</sub>

1: TOF MS ES+  
5.14e12

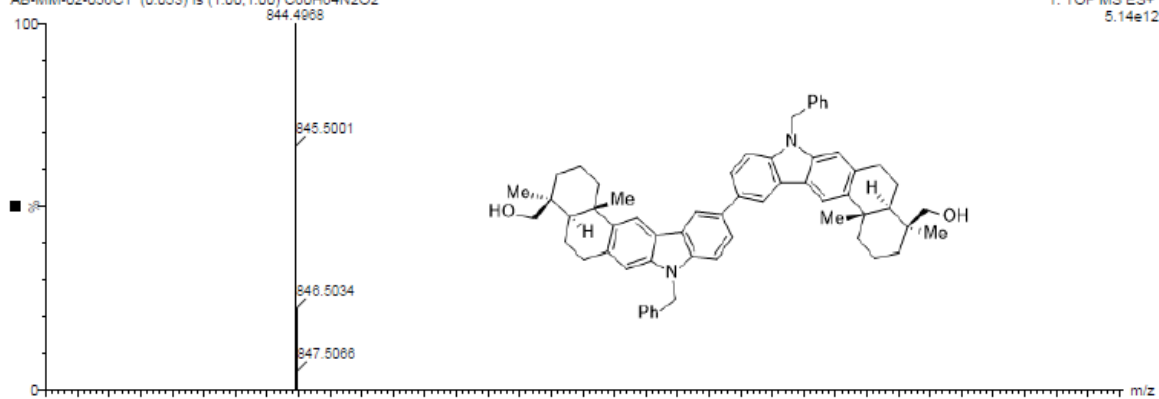

AB-MM-02-056C1 1 (0.053) Cm (1:8)

1: TOF MS ES+  
9.29e4

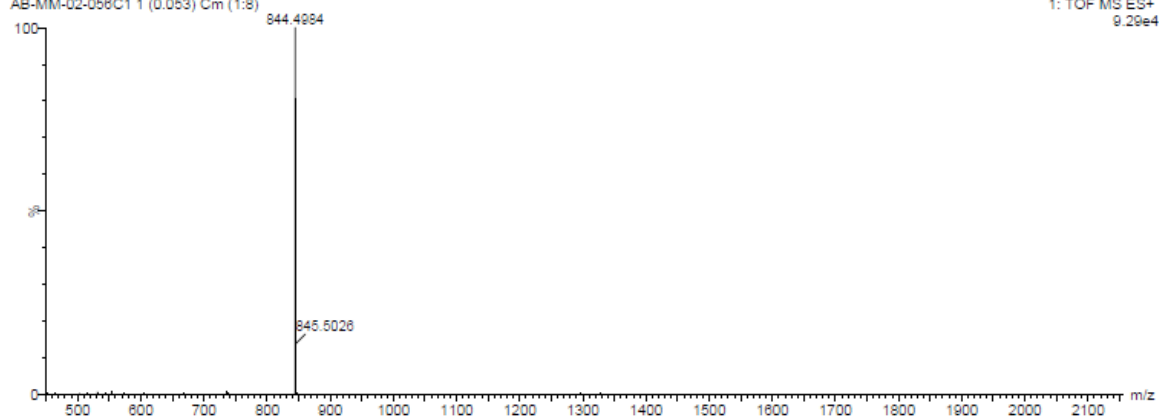

HRMS data of (+)-10e

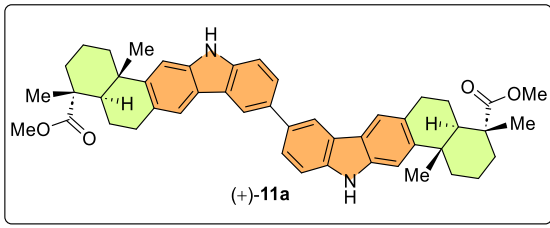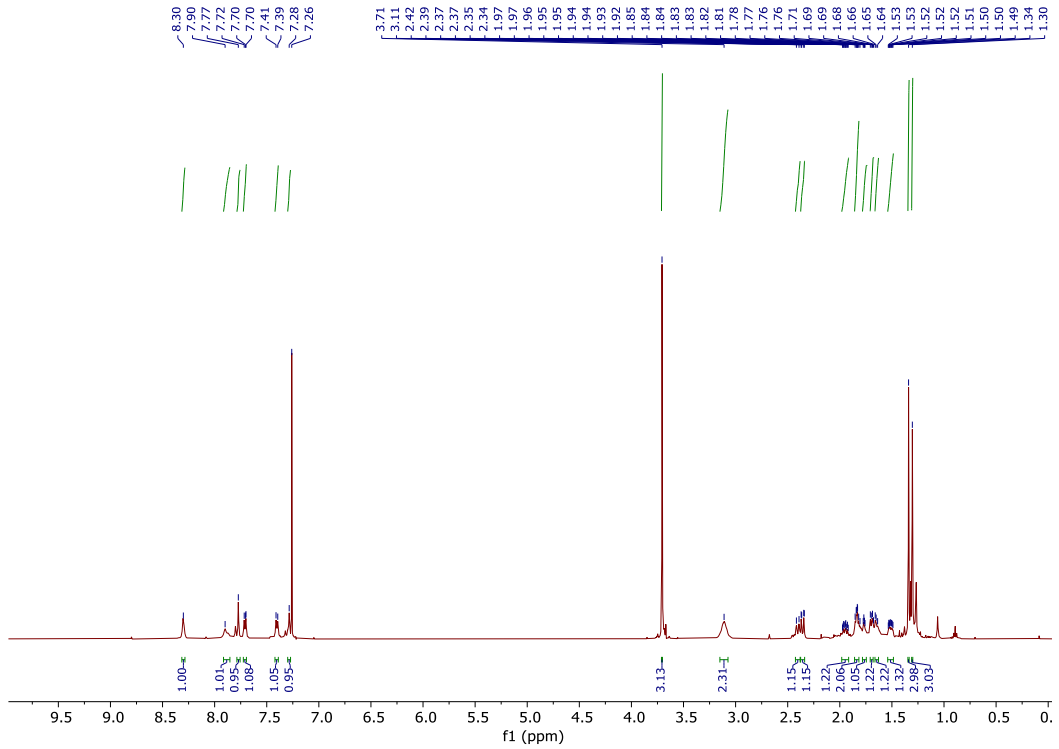

<sup>1</sup>H NMR (500 MHz, CDCl<sub>3</sub>) of (+)-11a

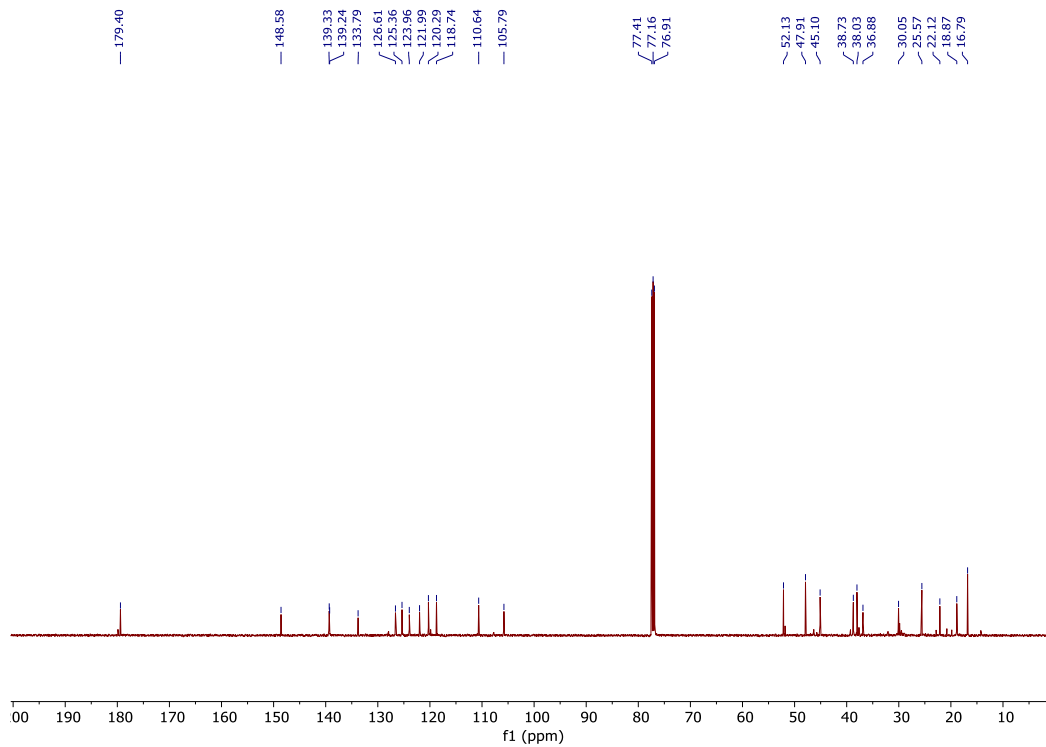

<sup>13</sup>C NMR (125 MHz, CDCl<sub>3</sub>) of (+)-11a

AB-MM-02-052A1 (0.053) Is (1.00,1.00) C<sub>48</sub>H<sub>52</sub>N<sub>2</sub>O<sub>4</sub>

1: TOF MS ES+  
5.83e12

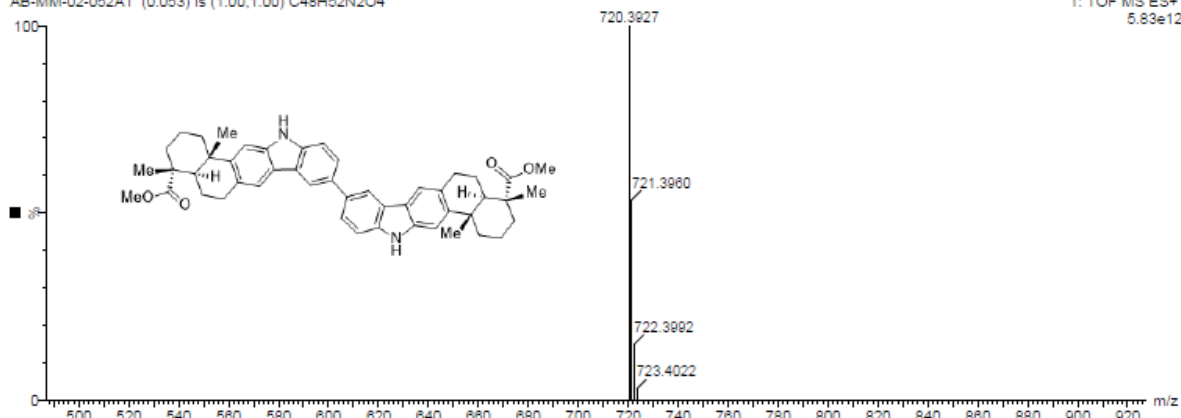

AB-MM-02-052A1 9 (0.208) Cm (9:14)

1: TOF MS ES+  
3.58e3

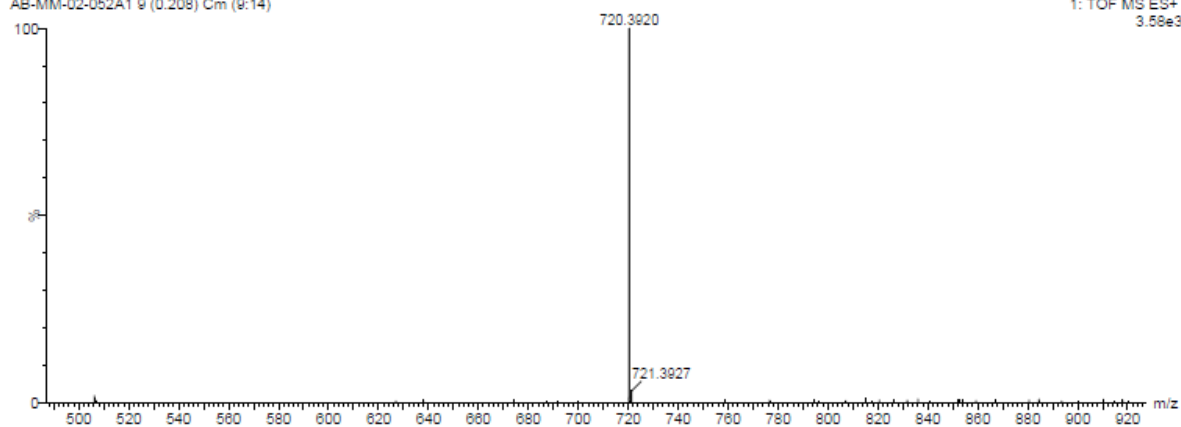

HRMS data of (+)-11a

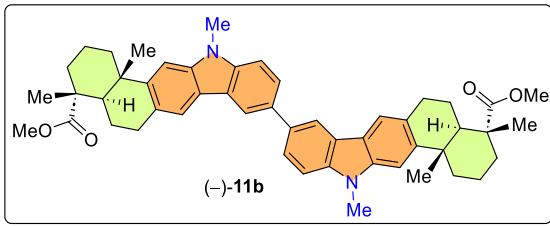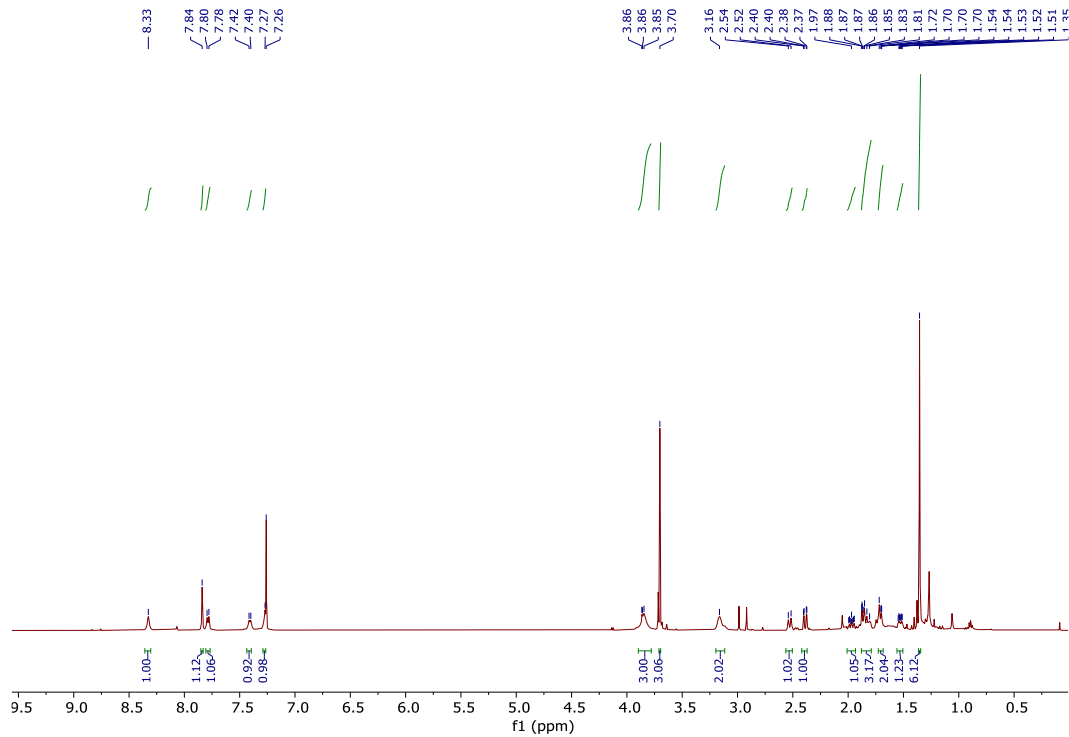

<sup>1</sup>H NMR (500 MHz, CDCl<sub>3</sub>) of (-)-11b

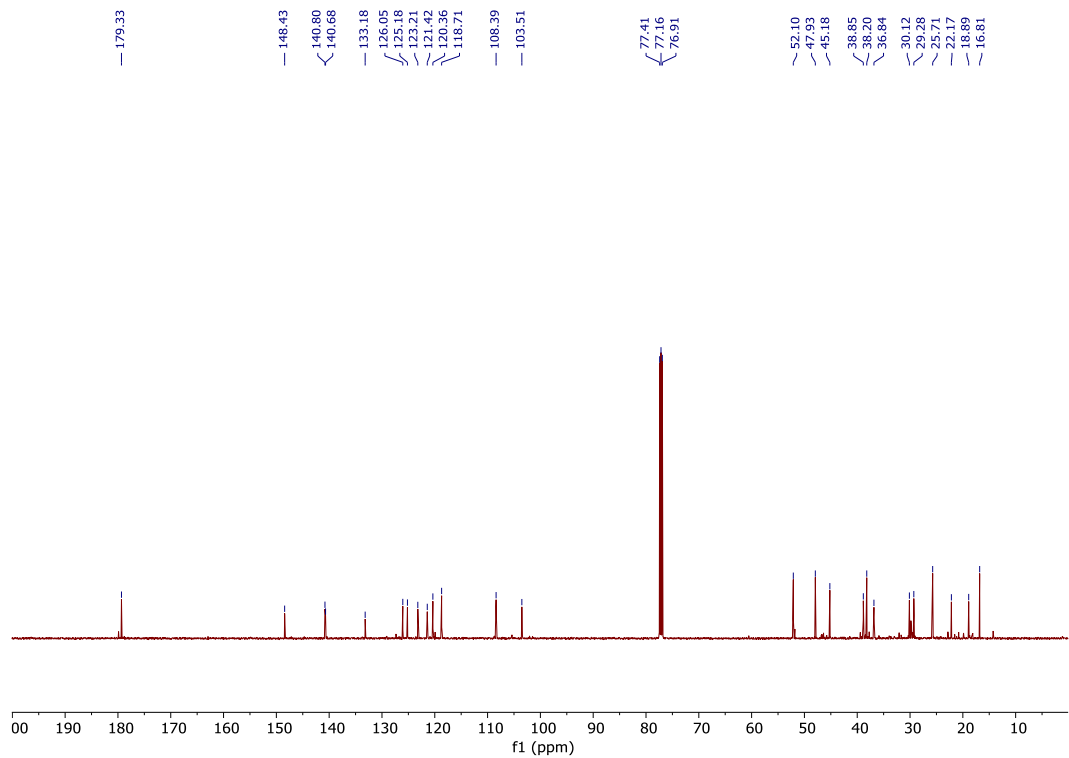

<sup>13</sup>C NMR (125 MHz, CDCl<sub>3</sub>) of (-)-11b

AB-MM-02-053C (0.053) Is (1.00, 1.00) C<sub>50</sub>H<sub>56</sub>N<sub>2</sub>O<sub>4</sub>

1: TOF MS ES+  
5.70e12

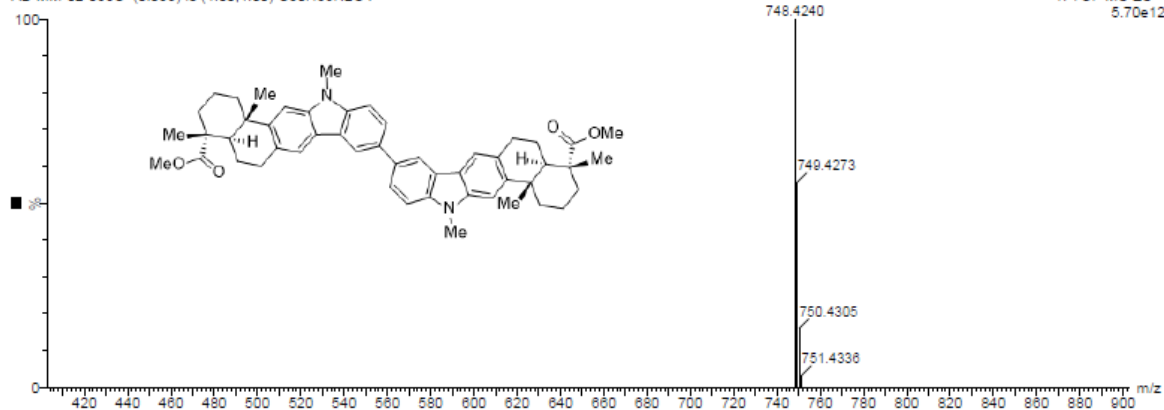

AB-MM-02-053C 2 (0.070) Cm (1:4)

1: TOF MS ES+  
1.41e3

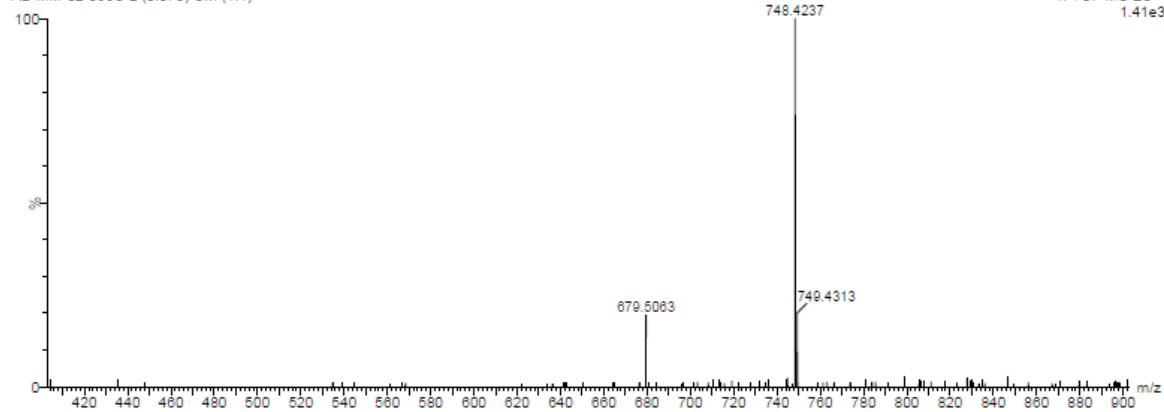

HRMS data of (-)-11b



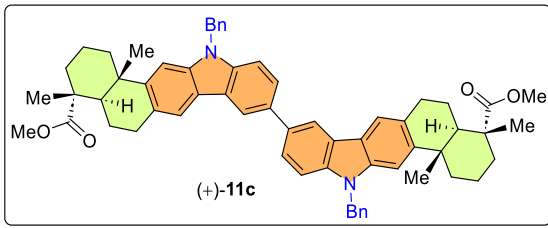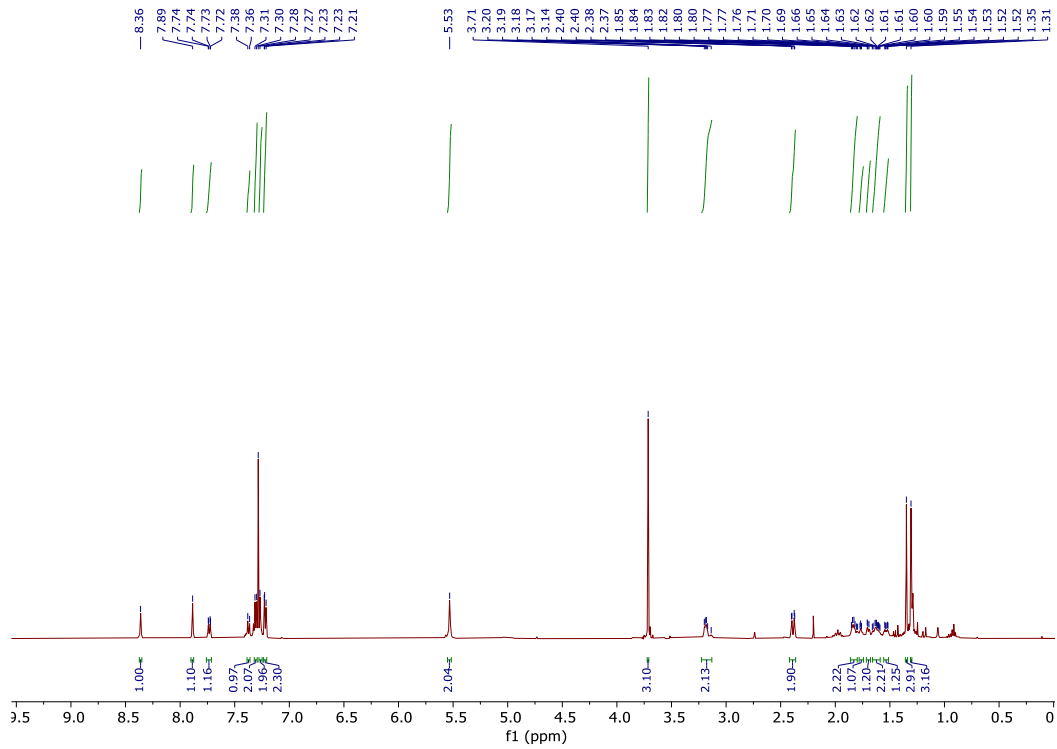

<sup>1</sup>H NMR (500 MHz, CDCl<sub>3</sub>) of (+)-11c

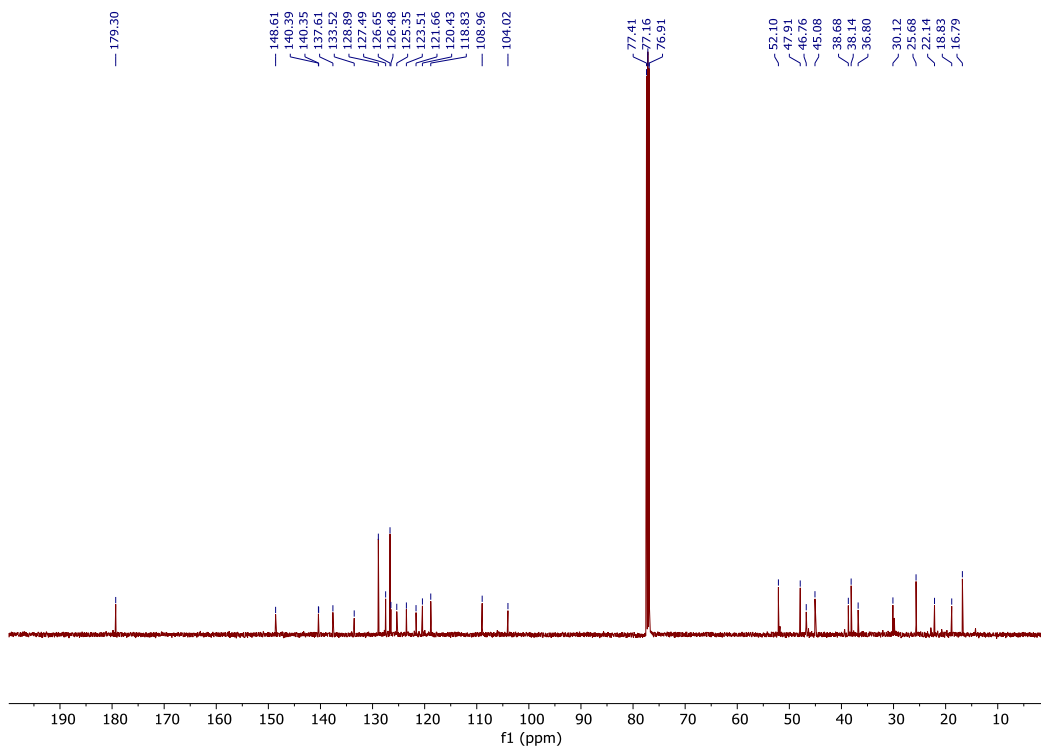

<sup>13</sup>C NMR (125 MHz, CDCl<sub>3</sub>) of (+)-11c

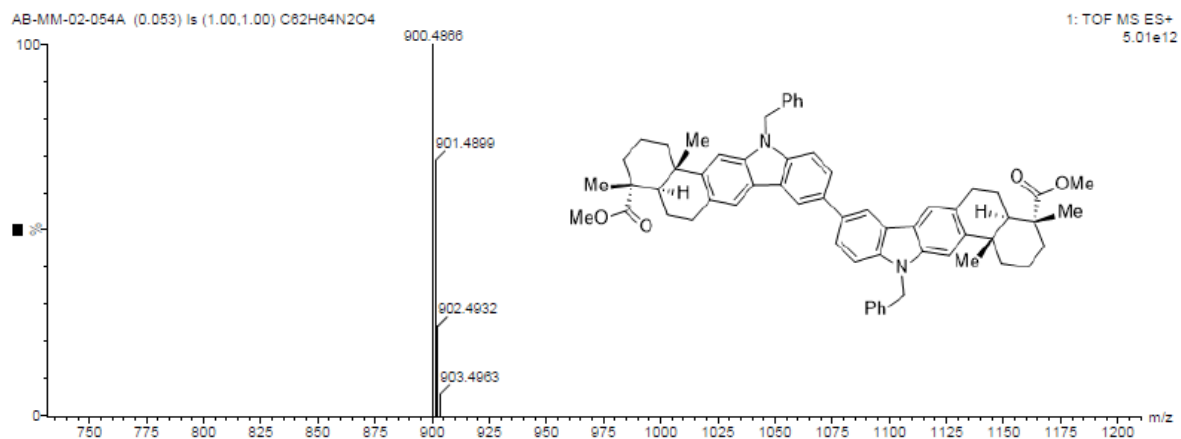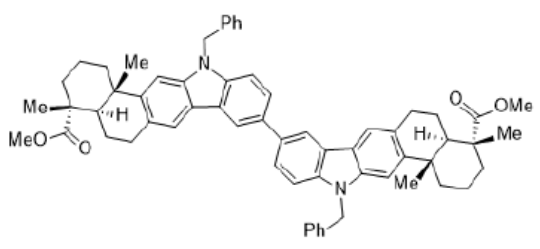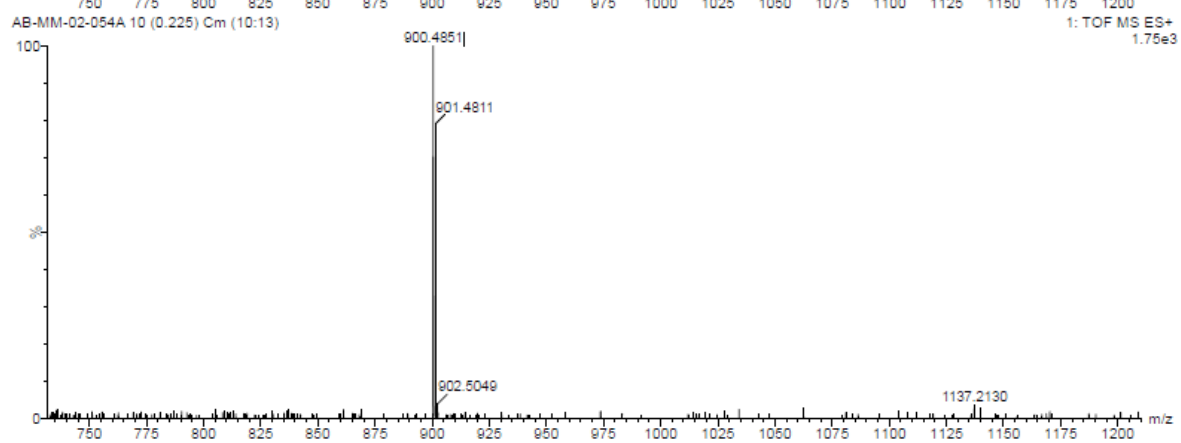

HRMS data of (+)-**11c**

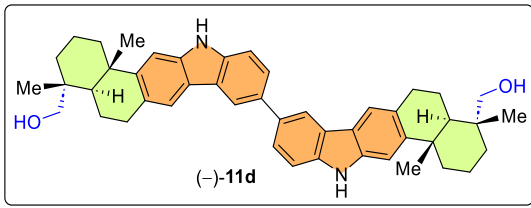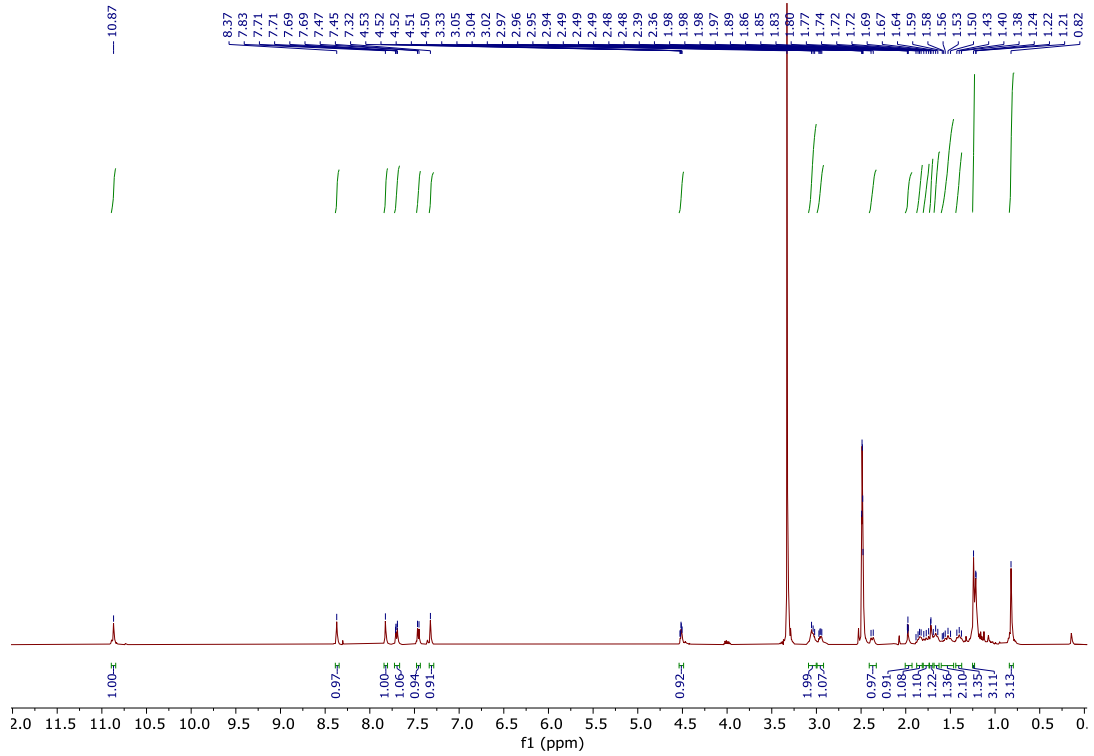

$^1\text{H}$  NMR (500 MHz, DMSO) of (-)-11d

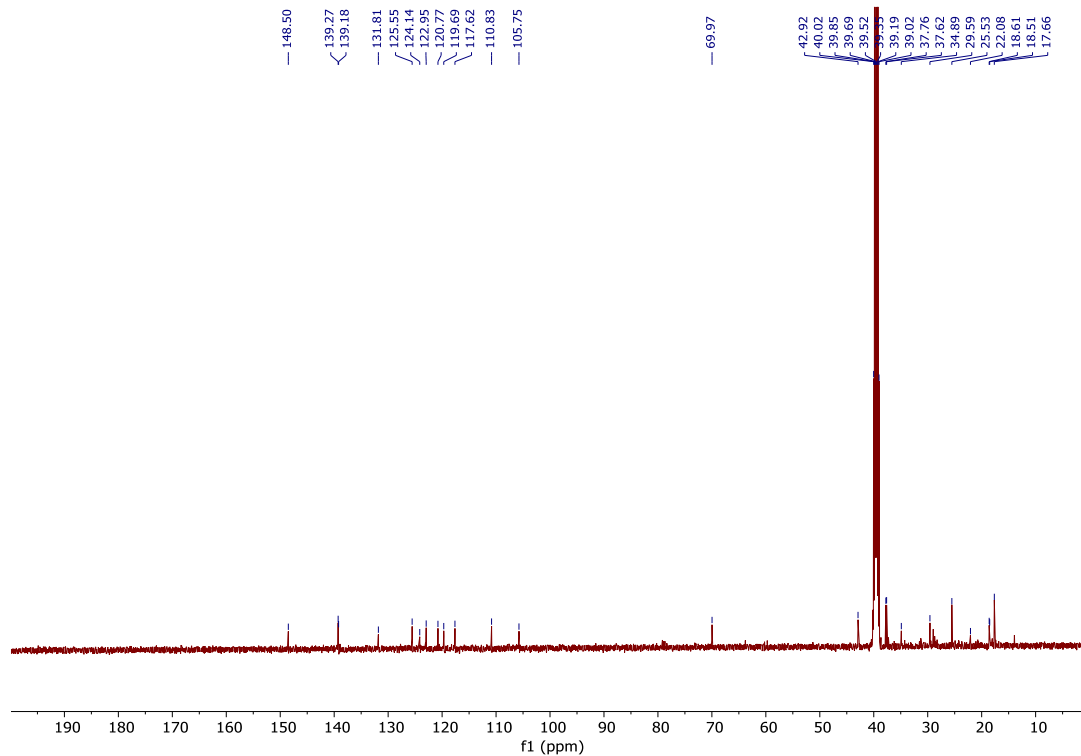

$^{13}\text{C}$  NMR (125 MHz, DMSO) of (-)-11d

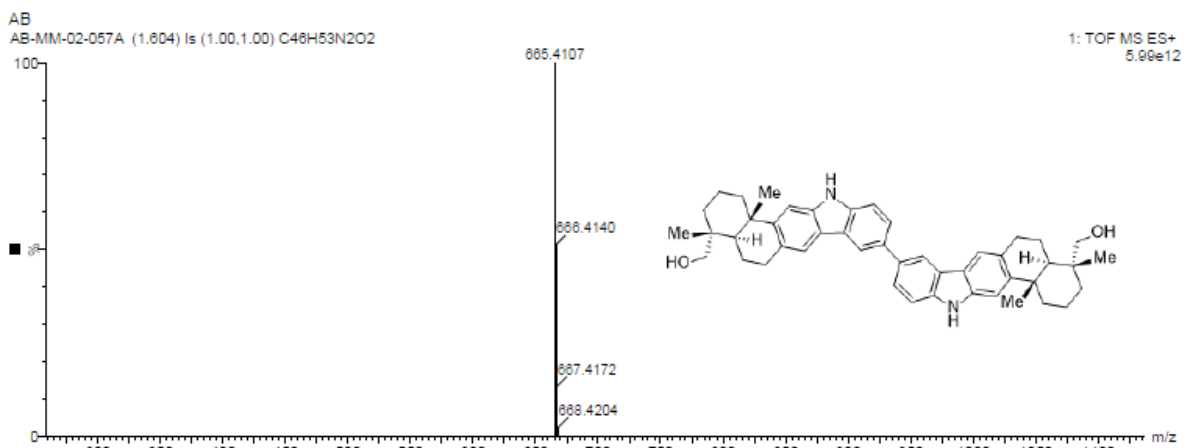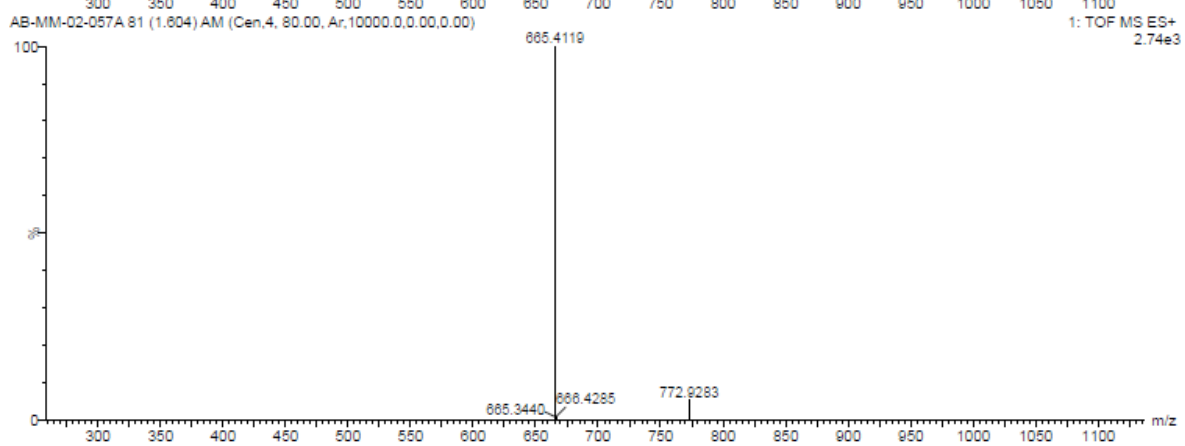

HRMS data of (-)-**11d**

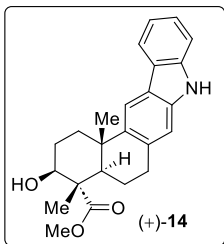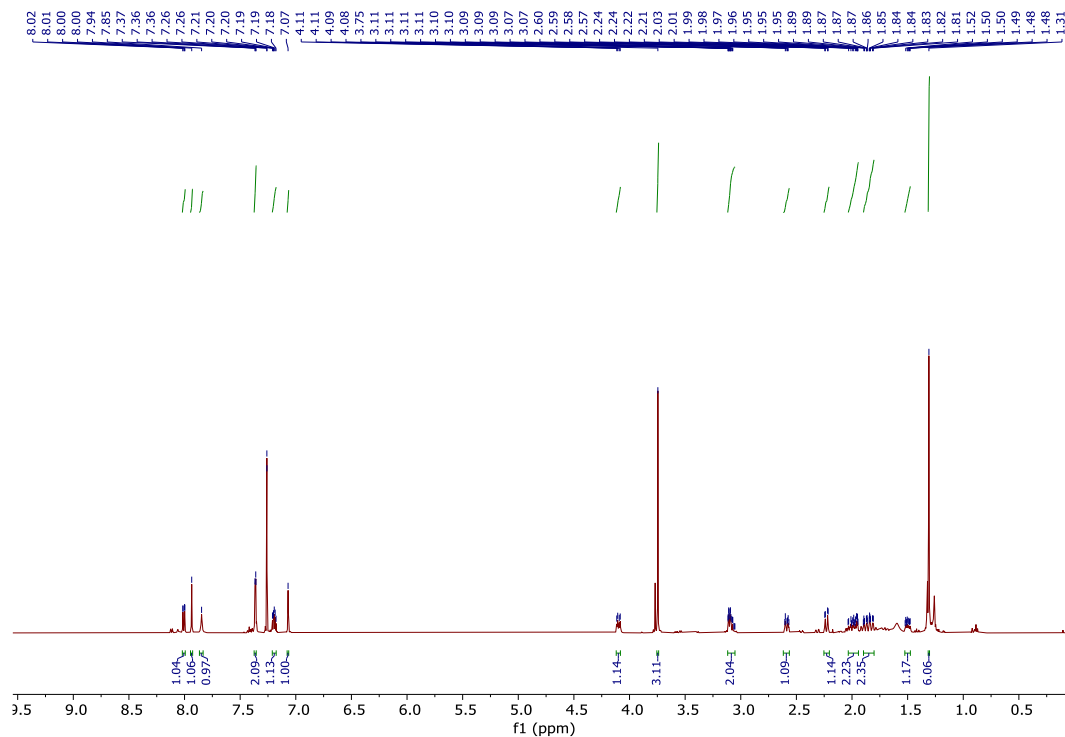

$^1\text{H NMR}$  (500 MHz,  $\text{CDCl}_3$ ) of (+)-14

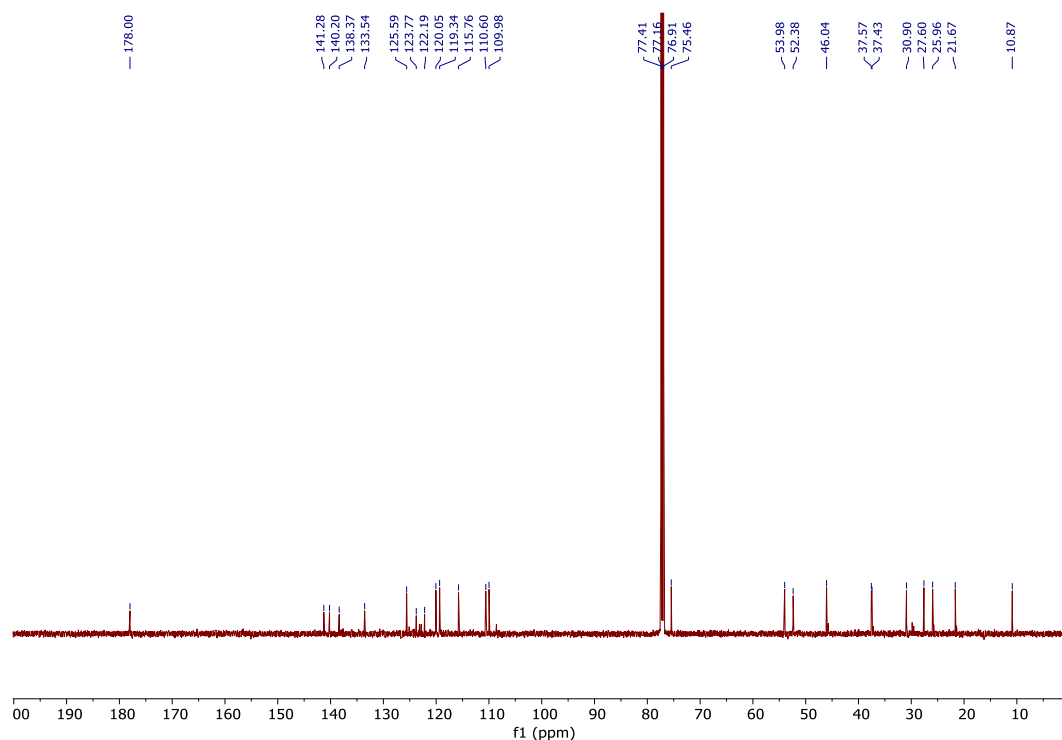

$^{13}\text{C NMR}$  (125 MHz,  $\text{CDCl}_3$ ) of (+)-14

## Display Report

**Analysis Info**

Analysis Name: D:\Data\User data\2023\JAN\lab\_mm\_02008.d  
 Method: Tune\_pos\_Standard\_July2022.new.m  
 Sample Name: ab\_mm\_02008  
 Comment:

Acquisition Date: 1/13/2023 11:18:59 AM

Operator: IISER Kolkata  
 Instrument: maXis impact 8282001.00127

**Acquisition Parameter**

|             |          |                      |          |                  |           |
|-------------|----------|----------------------|----------|------------------|-----------|
| Source Type | ESI      | Ion Polarity         | Positive | Set Nebulizer    | 0.4 Bar   |
| Focus       | Active   | Set Capillary        | 4500 V   | Set Dry Heater   | 200 °C    |
| Scan Begin  | 50 m/z   | Set End Plate Offset | -500 V   | Set Dry Gas      | 4.0 l/min |
| Scan End    | 1000 m/z | Set Charging Voltage | 2000 V   | Set Divert Valve | Source    |
|             |          | Set Corona           | 0 nA     | Set APCI Heater  | 0 °C      |

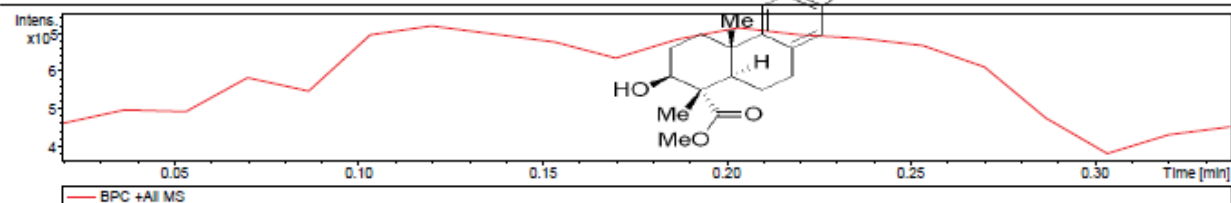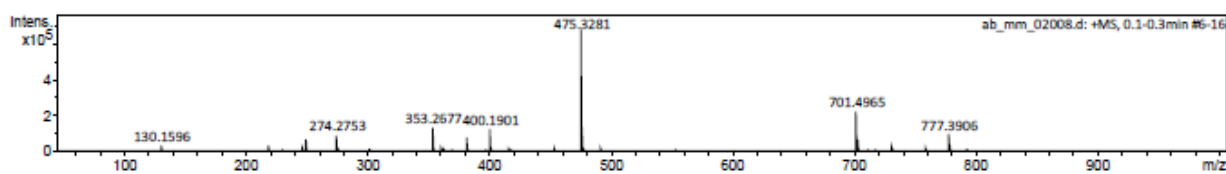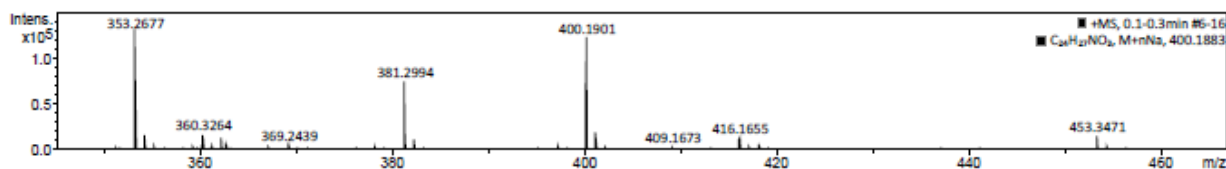

HRMS data of (+)-14

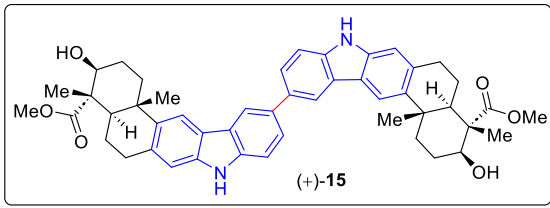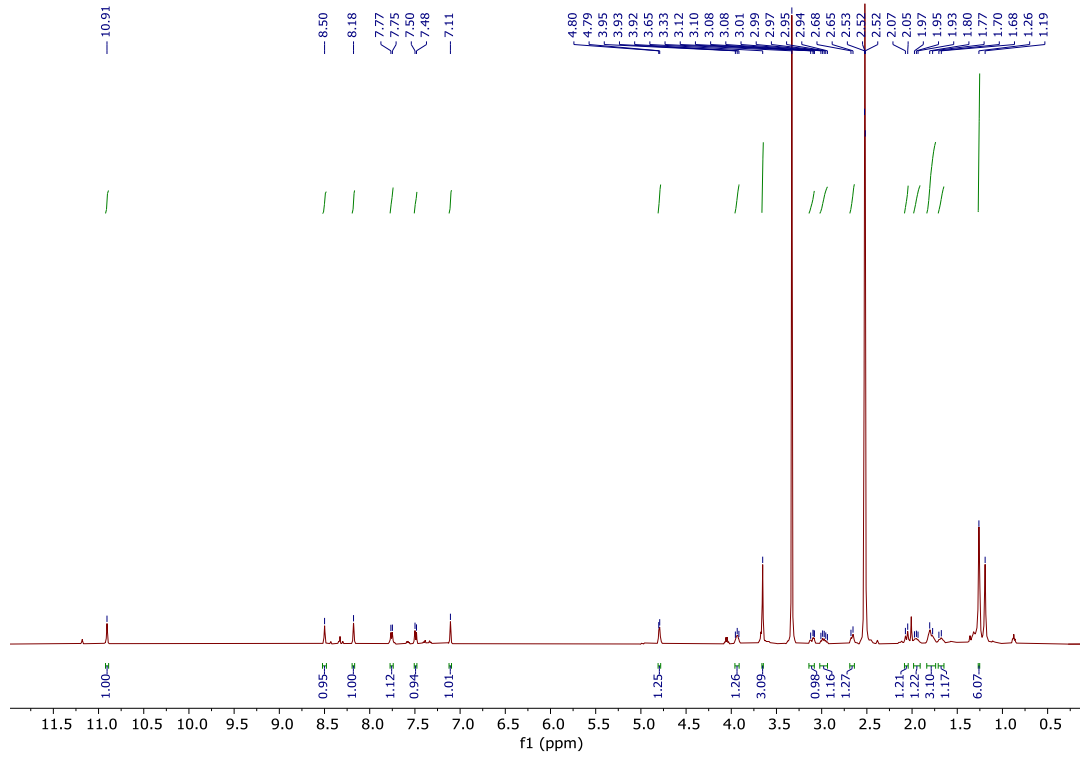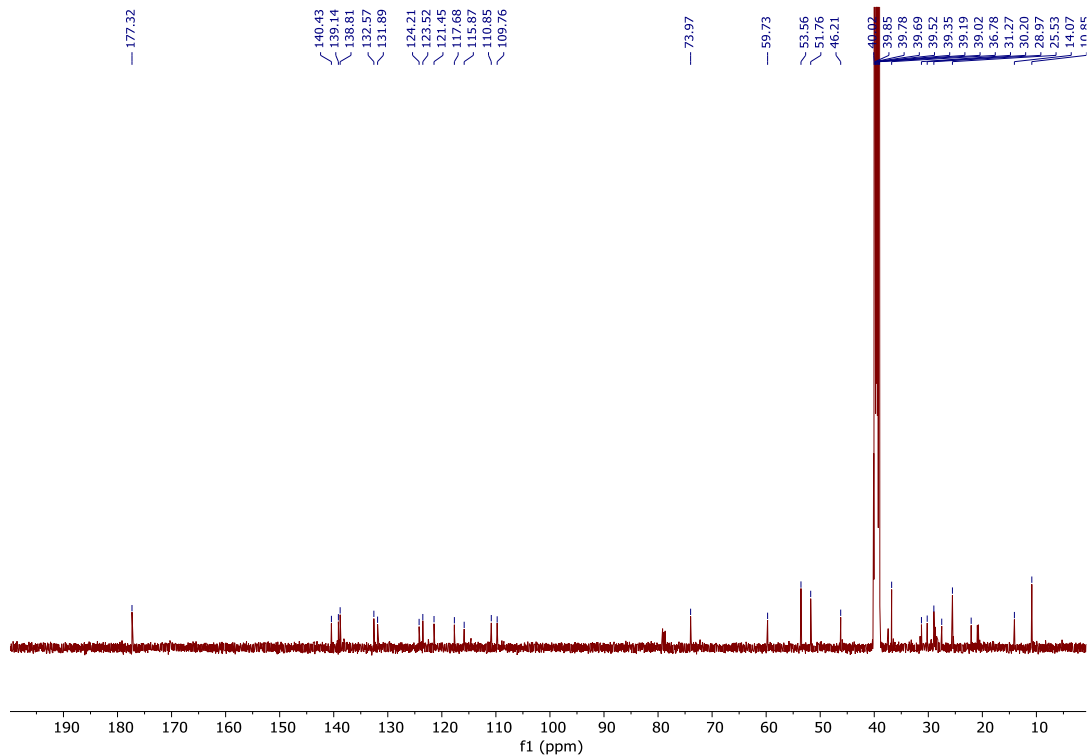

AB  
AB-MM-02-009 (0.053) Is (1.00,1.00) C<sub>48</sub>H<sub>53</sub>N<sub>2</sub>O<sub>8</sub> 1: TOF MS ES+ 5.80e12

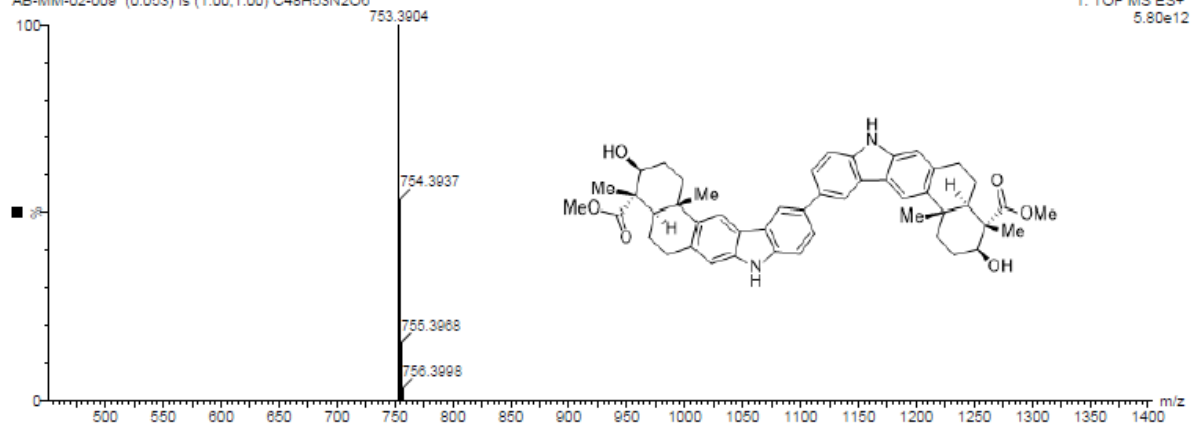

AB-MM-02-009 28 (0.569) AM2 (Ar,22000.0,556.28,0.00,LS 10) 1: TOF MS ES+ 9.51e3

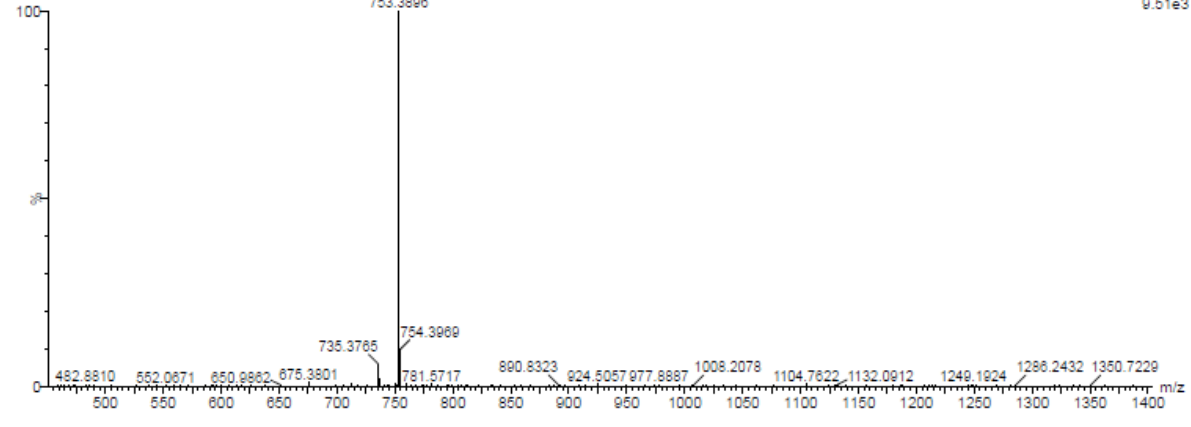

HRMS data of (+)-15



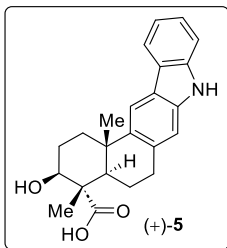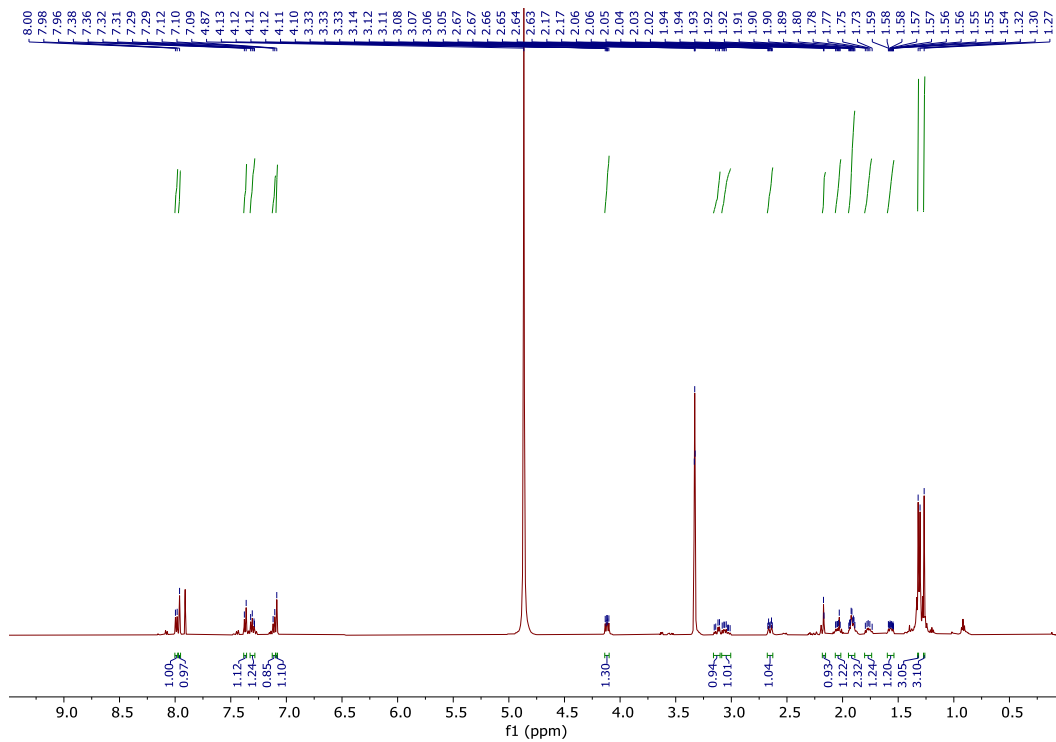

<sup>1</sup>H NMR (500 MHz, CD<sub>3</sub>OD) of (+)-5

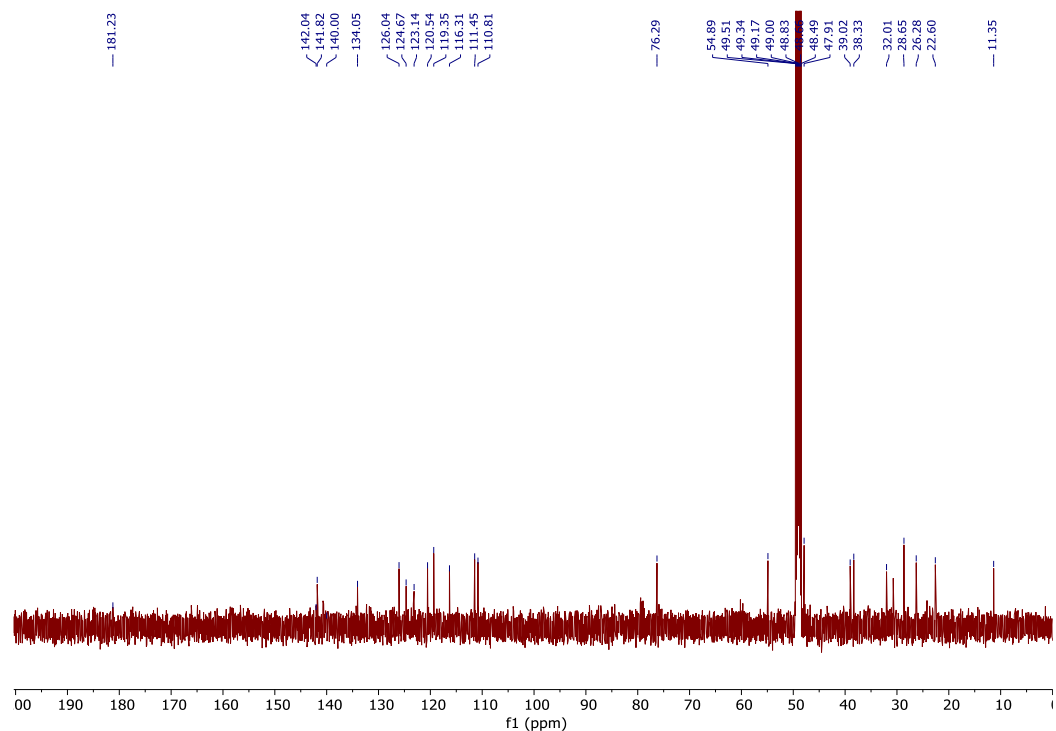

<sup>13</sup>C NMR (125 MHz, CD<sub>3</sub>OD) of (+)-5

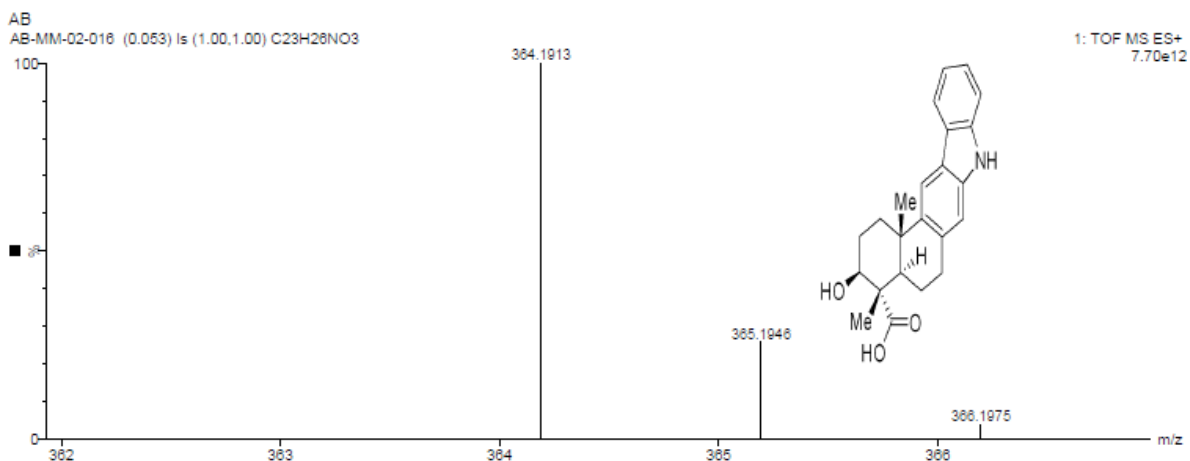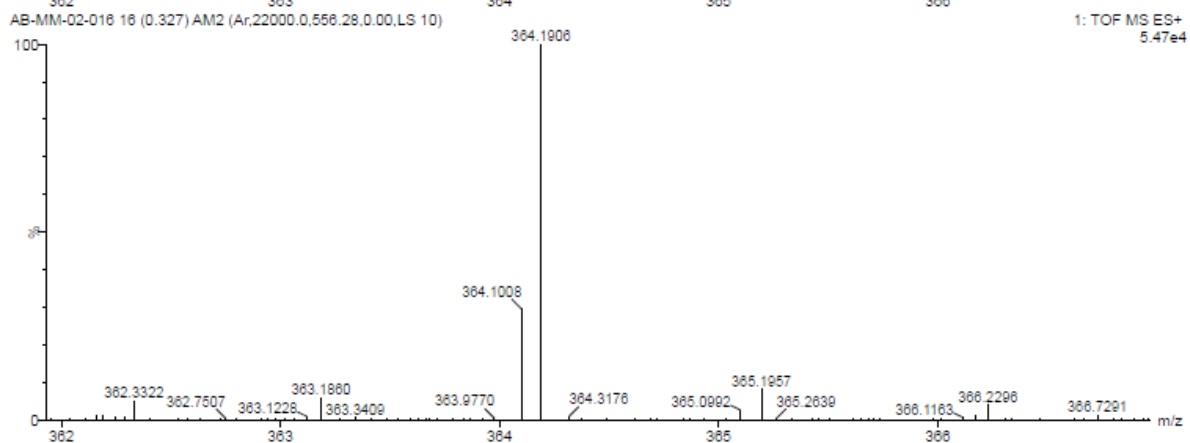

HRMS data of (+)-5

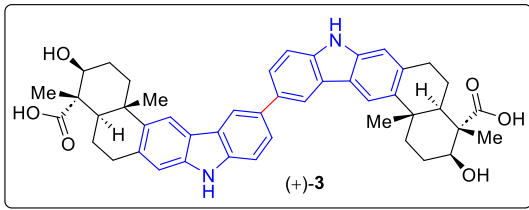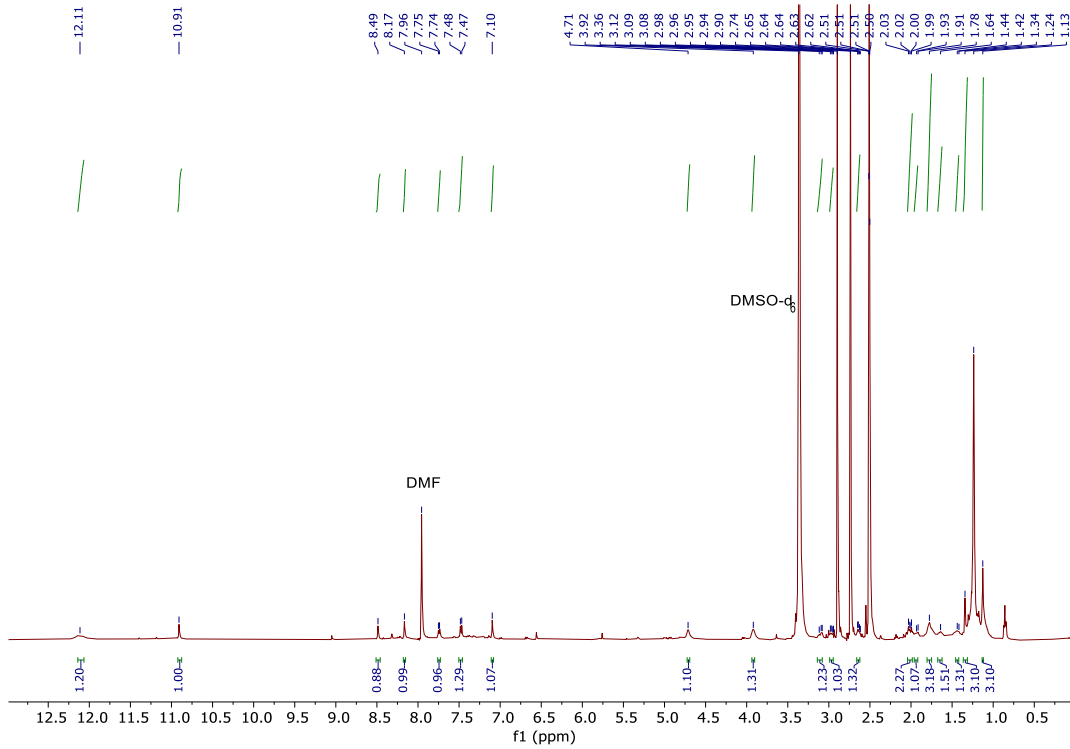

<sup>1</sup>H NMR (500 MHz, DMSO) of (+)-3

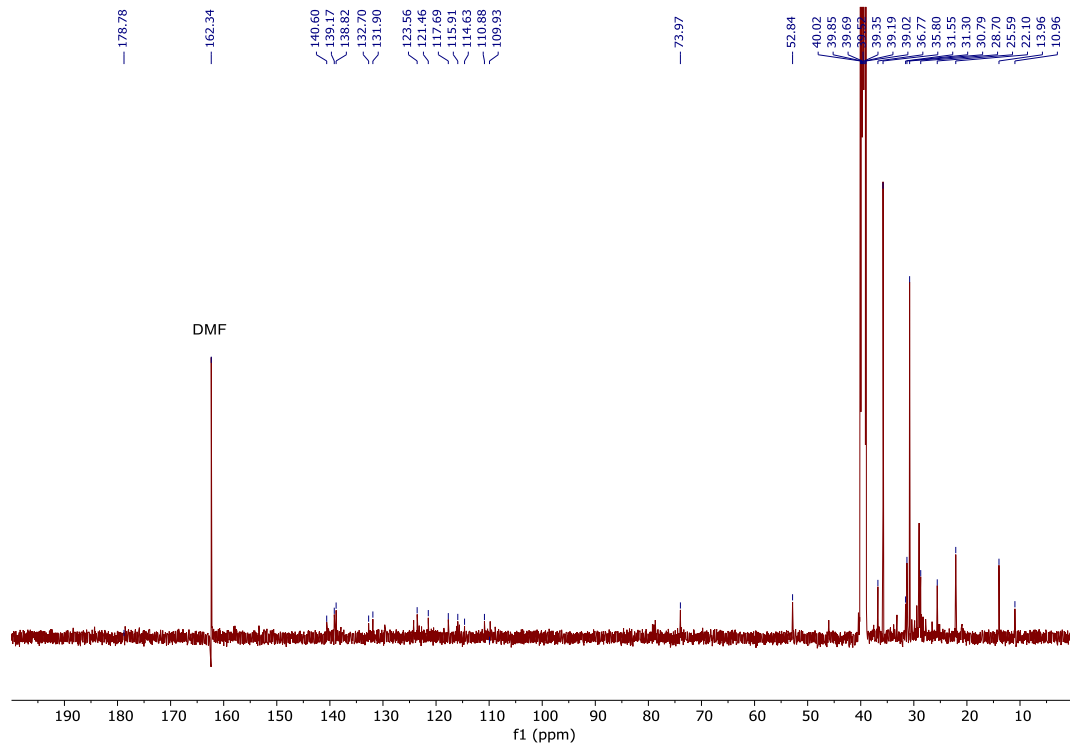

<sup>13</sup>C NMR (125 MHz, DMSO) of (+)-3

## Display Report

**Analysis Info**  
Analysis Name: D:\Data\User data\2023\UAN\lab\_mm\_02013r.d  
Method: Tune\_pos\_Mid\_July.m  
Sample Name: ab\_mm\_02013r  
Comment:  
Acquisition Date: 2/1/2023 10:51:15 AM  
Operator: IISER Kolkata  
Instrument: maXis impact  
8282001.00127

**Acquisition Parameter**

|             |          |                      |          |                  |           |
|-------------|----------|----------------------|----------|------------------|-----------|
| Source Type | ESI      | Ion Polarity         | Positive | Set Nebulizer    | 0.5 Bar   |
| Focus       | Active   | Set Capillary        | 3400 V   | Set Dry Heater   | 200 °C    |
| Scan Begin  | 50 m/z   | Set End Plate Offset | -500 V   | Set Dry Gas      | 4.0 l/min |
| Scan End    | 3000 m/z | Set Charging Voltage | 2000 V   | Set Divert Valve | Source    |
|             |          | Set Corona           | 0 nA     | Set APCI Heater  | 0 °C      |

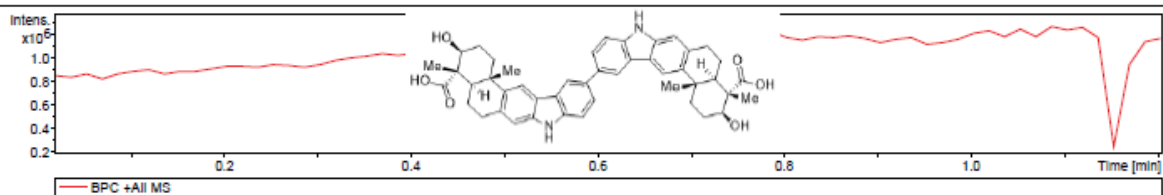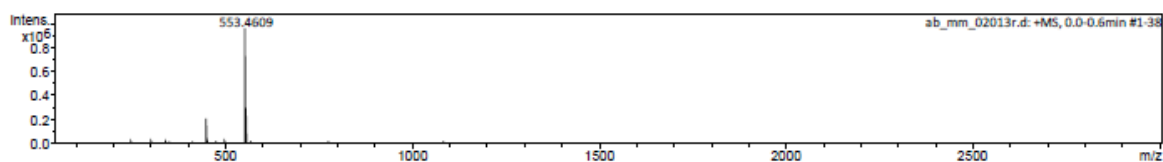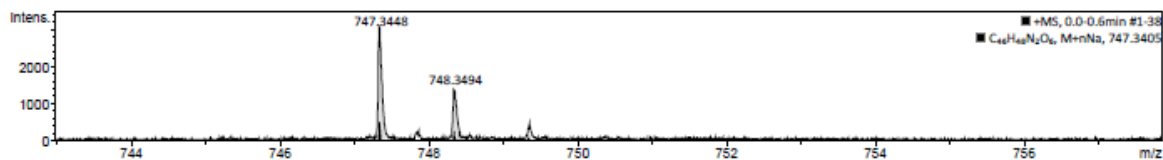

ab\_mm\_02013r.d  
Bruker Compass DataAnalysis 4.1 printed: 2/1/2023 10:58:58 AM by: IISER Kolkata Page 1 of 1

HRMS data of (+)-3

AB15-Apr-2024 14:53:36

IISER - KOLKATA

1: TOF MS ES+  
6.87e12

AB-TEMPO (0.053) Is (1.00,1.00) C<sub>33</sub>H<sub>45</sub>N<sub>2</sub>O<sub>3</sub>

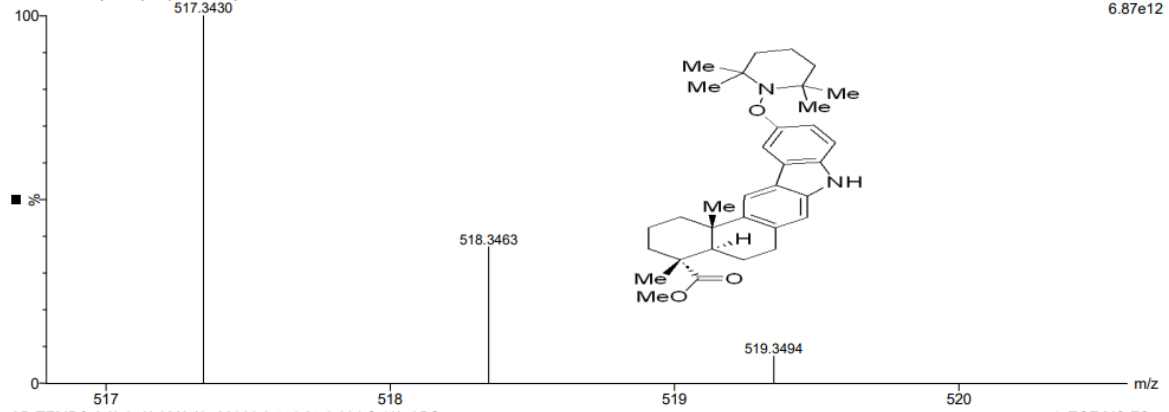

AB-TEMPO 2 (0.070) AM2 (Ar,22000.0,556.35,0.00,LS 10); ABS

1: TOF MS ES+  
1.52e4

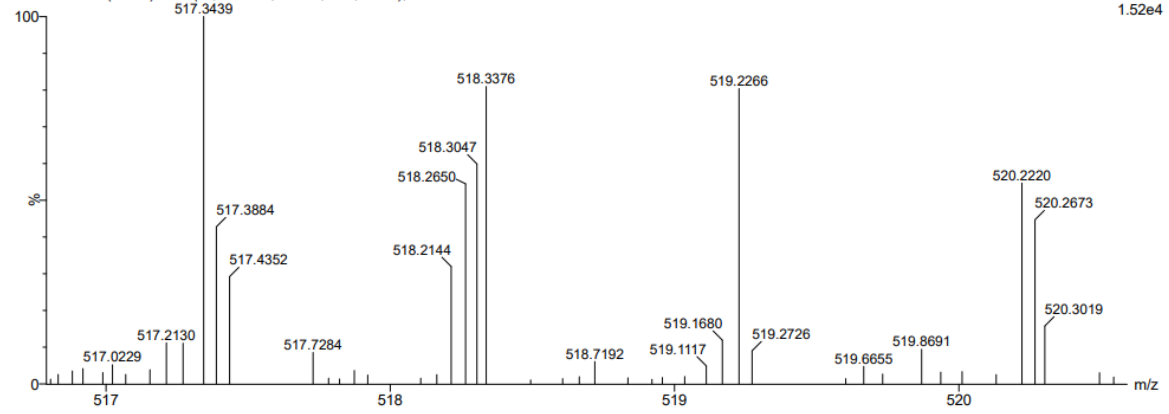

HRMS data of TEMPO-adduct with deoxy xiamycin A methyl ester

AB15-Apr-2024 14:53:36

IISER - KOLKATA

1: TOF MS ES+  
5.83e12

AB-TEMPO (0.053) Is (1.00,1.00) C<sub>48</sub>H<sub>53</sub>N<sub>2</sub>O<sub>4</sub>

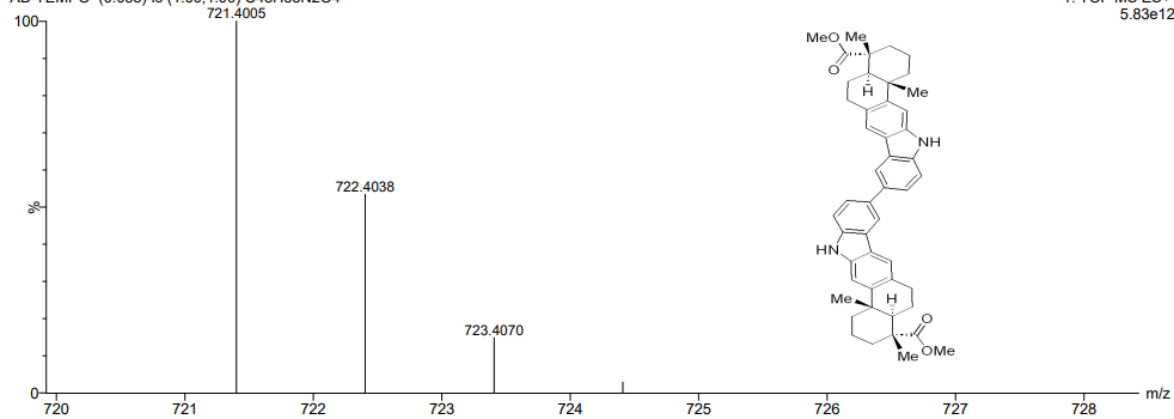

AB-TEMPO 3 (0.087) AM2 (Ar.22000.0.556.28,0.00,LS 10); ABS

1: TOF MS ES+  
1.57e5

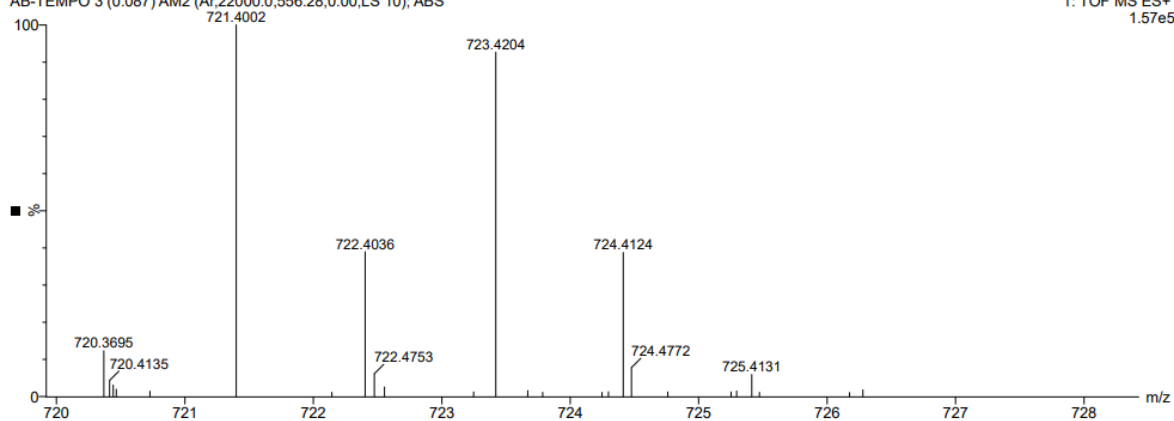

HRMS data of 9a
